# Supplementary material for: Effects of Different Storage Conditions on Lipid Stability in Mice Tissue Homogenates
Source: Metabolites. 2023 Mar 31;13(4):504. doi: 10.3390/metabo13040504 (PMC10144362; doi:10.3390/metabo13040504)
Supplement: Supplementary file 1 [file metabolites-13-00504-s001.zip]

Archive with 15 entries (15 files):
- Figure S10_dpi300_2023-03-24_ED.png
- Figure S11_dpi300_2023-03-24_ED.png
- Figure S12_dpi300_2023-03-23_ED.png
- Figure S13_dpi300_2023-03-24_ED.png
- Figure S1_w Sign_dpi300_2023-03-22_ED.png
- Figure S2_LPS-PS_LPEO-PEO_w Sign_dpi300_2023-03-22_ED.png
- Figure S3_dpi300_2023-03-24_ED.png
- Figure S4_dpi300_2023-03-24_ED.png
- Figure S5_dpi300_2023-03-24_ED.png
- Figure S6_dpi300_2023-03-24_ED.png
- Figure S7_dpi300_2023-03-24_ED.png
- Figure S8_dpi300_2023-03-24_ED.png
- Figure S9_dpi300_2023-03-24_ED.png
- Supplementary Material_Data S1_Lipid Data and Method Details_Rev_ED.xlsx
- Supplementary Material_Figures S1-S13_Rev_Cleaned_ED.pdf
