# Supplementary material for: Effects of Different Storage Conditions on Lipid Stability in Mice Tissue Homogenates
Source: Metabolites. 2023 Mar 31;13(4):504. doi: 10.3390/metabo13040504 (PMC10144362; doi:10.3390/metabo13040504)
Supplement: Supplementary file 1 [file metabolites-13-00504-s001.zip › Supplementary Material_Data S1_Lipid Data and Method Details_Rev_ED.xlsx]

## Sheet: Liver Data
Analyte	Class	Polarity	Adduct	Expected Mass (m/z)	Retention Time [min]	Internal Standard	Average Relative Change (Replicate Injections)	liver_ct_1	liver_ct_2	liver_ct_3	liver_ct_4	liver_ct_5	liver_Ice_035_1	liver_Ice_035_2	liver_Ice_035_3	liver_Ice_035_4	liver_Ice_035_5	liver_Ice_090_1	liver_Ice_090_2	liver_Ice_090_3	liver_Ice_090_4	liver_Ice_090_5	liver_Ice_120_1	liver_Ice_120_2	liver_Ice_120_3	liver_Ice_120_4	liver_Ice_120_5	liver_RT_035_1	liver_RT_035_2	liver_RT_035_3	liver_RT_035_4	liver_RT_035_5	liver_RT_090_1	liver_RT_090_2	liver_RT_090_3	liver_RT_090_4	liver_RT_090_5	liver_RT_120_1	liver_RT_120_2	liver_RT_120_3	liver_RT_120_4	liver_RT_120_5
Cer 18:0;O2/16:0	Cer	Positive	M+H	540.535	5.13	Cer d18:1/16:0-d7	0.0376185	0.0877	0.11	0.0791	0.1755	0.0691	0.107	0.116	0.0929	0.217	0.0726	0.106	0.125	0.123	0.167	0.0886	0.158	0.12	0.139	0.24	0.0882	0.198	0.212	0.155	0.263	0.172	0.211	0.273	0.301	0.313	0.29	0.285	0.236	0.241	0.443	0.361
Cer 18:0;O2/22:0	Cer	Positive	M+H	624.629	6.87	Cer d18:1/16:0-d7	0.0585527	0.0696	0.1075	0.05405	0.1052	0.0661	0.103	0.107	0.0592	0.104	0.0681	0.0971	0.132	0.0641	0.0961	0.0574	0.094	0.134	0.0683	0.119	0.075	0.117	0.135	0.0501	0.13	0.0744	0.0735	0.117	0.112	0.142	0.108	0.098	0.129	0.0895	0.159	0.106
Cer 18:0;O2/24:0	Cer	Positive	M+H	652.66	7.48	Cer d18:1/16:0-d7	0.0472207	0.116	0.179	0.09885	0.171	0.09845	0.154	0.159	0.0759	0.15	0.0981	0.122	0.155	0.115	0.165	0.112	0.166	0.143	0.118	0.188	0.0839	0.132	0.185	0.101	0.157	0.1	0.129	0.148	0.147	0.173	0.136	0.109	0.18	0.127	0.245	0.149
Cer 18:0;O2/24:1	Cer	Positive	M+H	650.645	6.89	Cer d18:1/16:0-d7	0.0399321	2.175	2.455	2.62	2.615	2.03	2.4	1.97	2.37	2.88	1.85	2.34	2.73	2.85	2.61	2.3	2.7	2.71	3.01	3.04	2.07	3.15	2.92	2.99	4.32	2.35	2.88	3.22	3.88	4.42	2.7	3.7	3.78	3.77	5.25	3.31
Cer 18:1;O2/16:0	Cer	Positive	M+H	538.519	4.92	Cer d18:1/16:0-d7	0.0343475	1.71	1.755	1.65	2.45	1.49	1.95	1.89	2.09	3.08	1.62	1.78	1.87	2.7	2.87	1.97	2.21	2.21	2.69	3.9	2.16	3.73	4.41	4.52	6.49	4.13	5.04	5.53	6.56	7.81	6.46	6.21	5.99	6.93	9.61	7.22
Cer 18:1;O2/18:0	Cer	Positive	M+H	566.551	5.48	Cer d18:1/16:0-d7	0.0507943	0.322	0.332	0.4045	0.6785	0.1595	0.37	0.308	0.34	0.754	0.172	0.331	0.341	0.425	0.616	0.227	0.541	0.411	0.504	0.802	0.225	0.834	0.636	0.747	1.33	0.366	0.962	0.753	0.955	1.41	0.545	1.18	0.789	1.02	1.96	0.608
Cer 18:1;O2/20:0	Cer	Positive	M+H	594.582	6.16	Cer d18:1/16:0-d7	0.135095	0.1465	0.177	0.2145	0.2515	0.1315	0.173	0.156	0.221	0.286	0.124	0.188	0.176	0.22	0.258	0.179	0.223	0.222	0.254	0.291	0.207	0.353	0.306	0.346	0.543	0.244	0.332	0.373	0.541	0.569	0.314	0.432	0.431	0.474	0.789	0.376
Cer 18:1;O2/21:0	Cer	Positive	M+H	608.598	6.45	Cer d18:1/16:0-d7	0.148108	0.05375	0.05375	0.0873	0.0813	0.0673	0.0617	0.0402	0.0735	0.093	0.0462	0.00735	0.0818	0.0961	0.0608	0.0695	0.0307	0.0745	0.103	0.111	0.0801	0.126	0.103	0.117	0.201	0.074	0.0758	0.121	0.163	0.168	0.112	0.112	0.136	0.172	0.258	0.131
Cer 18:1;O2/22:0	Cer	Positive	M+H	622.613	6.67	Cer d18:1/16:0-d7	0.0369571	1.265	1.465	1.6	1.585	1.275	1.23	1.16	1.45	1.73	1.17	1.22	1.44	1.75	1.54	1.46	1.53	1.64	1.86	2.01	1.44	1.86	2.02	2.12	3.18	1.64	1.86	2.22	2.77	3.15	2.13	2.31	2.65	2.71	4.71	2.41
Cer 18:1;O2/23:0	Cer	Positive	M+H	636.629	6.98	Cer d18:1/16:0-d7	0.069667	1.023	1.1	1.35	1.26	0.971	1.16	1.01	1.18	1.32	0.949	1.05	1.11	1.4	1.25	1.03	1.35	1.23	1.57	1.47	1.05	1.52	1.42	1.69	2.42	1.16	1.43	1.53	2.09	2.47	1.53	1.86	1.76	1.95	2.9	1.67
Cer 18:1;O2/24:0	Cer	Positive	M+H	650.645	7.27	Cer d18:1/16:0-d7	0.0399321	2.175	2.455	2.62	2.615	2.03	2.4	1.97	2.37	2.88	1.85	2.34	2.73	2.85	2.61	2.3	2.7	2.71	3.01	3.04	2.07	3.15	2.92	2.99	4.32	2.35	2.88	3.22	3.88	4.42	2.7	3.7	3.78	3.77	5.25	3.31
Cer 18:1;O2/24:1	Cer	Positive	M+H	648.629	6.69	Cer d18:1/16:0-d7	0.036269	4.765	5.55	5.44	5.73	4.76	4.91	4.7	4.8	7.23	4.47	4.76	5.57	6	6.35	5.61	6.04	6.49	6.91	8.52	5.45	6.73	7.11	6.51	9.37	5.62	6.33	7.22	8.37	8.99	7.33	7.62	8.15	7.79	13	8.29
Cer 18:1;O2/26:0	Cer	Positive	M+H	678.676	7.82	Cer d18:1/16:0-d7	0.0431697	0.02735	0.0282	0.0436	0.05845	0.02565	0.0427	0.0113	0.0575	0.0538	0.00903	0.0263	0.0365	0.0337	0.0538	0.0222	0.0408	0.026	0.0562	0.0437	0.0195	0.0593	0.0411	0.0318	0.0713	0.01	0.0291	0.0299	0.136	0.0702	0.0211	0.0361	0.0351	0.0292	0.0691	0.0251
Cer 18:2;O2/22:0	Cer	Positive	M+H	620.598	6.2	Cer d18:1/16:0-d7	0.0673379	0.1955	0.253	0.28	0.2575	0.2625	0.25	0.228	0.296	0.306	0.241	0.229	0.26	0.333	0.293	0.281	0.25	0.302	0.369	0.4	0.3	0.34	0.375	0.37	0.399	0.291	0.289	0.367	0.488	0.443	0.409	0.396	0.402	0.472	0.578	0.419
Cer 18:2;O2/23:0	Cer	Positive	M+H	634.613	6.51	Cer d18:1/16:0-d7	0.118285	0.265	0.347	0.4085	0.3305	0.3135	0.339	0.246	0.316	0.428	0.27	0.263	0.364	0.446	0.33	0.361	0.328	0.367	0.204	0.488	0.331	0.372	0.414	0.427	0.174	0.38	0.325	0.455	0.523	0.482	0.465	0.427	0.47	0.534	0.67	0.527
Cer 18:2;O2/24:1	Cer	Positive	M+H	646.613	6.21	Cer d18:1/16:0-d7	0.0393847	0.478	0.5885	0.5955	0.574	0.5185	0.541	0.58	0.571	0.741	0.51	0.528	0.621	0.651	0.692	0.652	0.674	0.697	0.727	0.837	0.678	0.738	0.753	0.66	0.797	0.66	0.665	0.786	0.839	0.852	0.84	0.799	0.902	0.902	1.04	0.856
SM 32:1;O2	SM	Positive	M+H	675.544	3.86	SM d18:1/18:1-d9	0.0447162	0.032	0.0273	0.0401	0.0313	0.02935	0.0299	0.0268	0.0376	0.033	0.0285	0.0313	0.0222	0.0411	0.0263	0.0252	0.0309	0.0232	0.0428	0.0291	0.028	0.0253	0.0234	0.0382	0.029	0.0245	0.0235	0.0199	0.0279	0.032	0.0238	0.0277	0.0191	0.0325	0.0283	0.0209
SM 33:1;O2	SM	Positive	M+H	689.559	4.06	SM d18:1/18:1-d9	0.022894	0.1035	0.0979	0.106	0.1035	0.07805	0.0898	0.0943	0.091	0.0993	0.0806	0.0953	0.0887	0.108	0.0849	0.0868	0.101	0.0838	0.123	0.103	0.0805	0.0836	0.0743	0.0889	0.113	0.072	0.0965	0.0773	0.0771	0.102	0.0747	0.097	0.0717	0.0869	0.0811	0.0646
SM 33:2;O3	SM	Positive	M+H	703.538	2.94	SM d18:1/18:1-d9	0.0554191	0.010475	0.00993	0.00984	0.0108	0.007635	0.0091	0.012	0.0234	0.0186	0.0172	0.0425	0.0513	0.0309	0.043	0.0282	0.0236	0.0392	0.0292	0.0478	0.0249	0.0197	0.0112	0.0154	0.0152	0.0249	0.023	0.0413	0.0221	0.0577	0.0215	0.0299	0.0412	0.0181	0.0259	0.0256
SM 34:0;O2	SM	Positive	M+H	705.591	4.45	SM d18:1/18:1-d9	0.0480045	0.1205	0.0973	0.1125	0.1195	0.08835	0.121	0.107	0.111	0.109	0.0783	0.126	0.113	0.106	0.121	0.0933	0.102	0.094	0.114	0.137	0.0911	0.101	0.0845	0.114	0.133	0.0744	0.104	0.0977	0.107	0.127	0.0857	0.124	0.0863	0.0946	0.104	0.0743
SM 34:1;O2	SM	Positive	M+H	703.575	4.25	SM d18:1/18:1-d9	0.0190354	2.87	2.67	3.04	2.305	1.995	3.06	2.16	2.17	2.61	1.96	2.84	2.44	2.62	2.46	2.41	2.37	2.62	2.54	2.94	2.08	2.5	2.23	2.37	3.04	2.06	2.71	2.11	2.41	2.81	1.96	2.75	2.11	2.46	2.11	1.81
SM 34:1;O3	SM	Positive	M+H	719.57	4.08	SM d18:1/18:1-d9	0.0694725	0.0176	0.01505	0.0205	0.02045	0.01725	0.0147	0.0121	0.0174	0.0238	0.0115	0.0172	0.0192	0.0143	0.016	0.0182	0.0182	0.0152	0.0225	0.0176	0.0138	0.0171	0.0159	0.0134	0.0209	0.0116	0.0117	0.0146	0.0192	0.0198	0.0166	0.0207	0.0104	0.016	0.0147	0.0113
SM 34:2;O2	SM	Positive	M+H	701.559	3.93	SM d18:1/18:1-d9	0.00959061	0.136	0.119	0.1255	0.128	0.0979	0.12	0.127	0.103	0.136	0.0998	0.117	0.0937	0.102	0.108	0.0854	0.108	0.0907	0.105	0.114	0.0994	0.108	0.0965	0.0997	0.125	0.0852	0.101	0.0845	0.0667	0.121	0.0724	0.115	0.0832	0.0708	0.105	0.0572
SM 35:1;O2	SM	Positive	M+H	717.591	4.48	SM d18:1/18:1-d9	0.0254452	0.04325	0.04255	0.05165	0.047	0.0262	0.0379	0.0377	0.0368	0.0541	0.0259	0.0423	0.033	0.0393	0.0504	0.0383	0.0363	0.0378	0.0483	0.0551	0.0248	0.0348	0.0277	0.0401	0.0559	0.0289	0.0424	0.0298	0.0378	0.0523	0.0239	0.0458	0.0306	0.0341	0.0419	0.0217
SM 36:0;O2	SM	Positive	M+H	733.622	4.92	SM d18:1/18:1-d9	0.0155164	0.0276	0.02035	0.02515	0.0346	0.01355	0.0261	0.0234	0.0241	0.035	0.0144	0.0262	0.0193	0.0259	0.0319	0.0133	0.0253	0.023	0.0284	0.0388	0.0167	0.0197	0.0185	0.0297	0.0421	0.014	0.0267	0.0215	0.0259	0.0444	0.0151	0.0278	0.0216	0.0268	0.0303	0.0113
SM 36:1;O2	SM	Positive	M+H	731.606	4.73	SM d18:1/18:1-d9	0.0326563	0.558	0.4535	0.578	0.734	0.35	0.591	0.517	0.491	0.684	0.364	0.636	0.478	0.577	0.655	0.406	0.617	0.539	0.671	0.8	0.308	0.5	0.45	0.498	0.773	0.388	0.556	0.431	0.538	0.774	0.349	0.602	0.396	0.571	0.629	0.346
SM 36:2;O2	SM	Positive	M+H	729.591	4.36	SM d18:1/18:1-d9	0.0155253	0.0366	0.02035	0.03505	0.034	0.0134	0.0235	0.0267	0.0341	0.0289	0.0172	0.0307	0.0156	0.036	0.0302	0.0181	0.027	0.0192	0.0269	0.0284	0.0173	0.0347	0.0198	0.0256	0.035	0.0205	0.0271	0.0128	0.0201	0.0241	0.0117	0.0259	0.0163	0.0199	0.0311	0.00863
SM 37:1;O2	SM	Positive	M+H	745.622	5.03	SM d18:1/18:1-d9	0.0160576	0.0308	0.03105	0.03415	0.0364	0.02025	0.0297	0.0319	0.0273	0.0358	0.0191	0.027	0.0268	0.0307	0.0329	0.0206	0.0289	0.0272	0.0359	0.0393	0.0174	0.0248	0.0267	0.0312	0.0424	0.0194	0.0282	0.0264	0.0262	0.0371	0.0189	0.0361	0.0242	0.0288	0.0317	0.0192
SM 38:0;O2	SM	Positive	M+H	761.653	5.51	SM d18:1/18:1-d9	0.121772	0.005505	0.005935	0.00733	0.008035	0.00438	0.00472	0.00561	0.00498	0.00732	0.0037	0.00442	0.00513	0.00601	0.00725	0.00411	0.00812	0.00432	0.00717	0.00846	0.00411	0.00512	0.00538	0.00725	0.00851	0.00436	0.00675	0.00538	0.0066	0.00945	0.00411	0.00717	0.00514	0.00769	0.00694	0.00485
SM 38:1;O2	SM	Positive	M+H	759.637	5.32	SM d18:1/18:1-d9	0.0628632	0.244	0.2415	0.31	0.2755	0.2085	0.235	0.223	0.251	0.266	0.209	0.244	0.236	0.275	0.281	0.237	0.251	0.249	0.325	0.318	0.224	0.218	0.239	0.3	0.333	0.208	0.238	0.214	0.264	0.324	0.214	0.289	0.215	0.29	0.227	0.224
SM 38:2;O2	SM	Positive	M+H	757.622	4.86	SM d18:1/18:1-d9	0.0221036	0.01975	0.01925	0.0265	0.0237	0.02025	0.0147	0.0163	0.0208	0.0203	0.0158	0.0172	0.019	0.0185	0.0201	0.0172	0.0206	0.0171	0.0255	0.0238	0.0124	0.0147	0.0159	0.0272	0.0208	0.0188	0.0181	0.0136	0.0249	0.0205	0.0184	0.021	0.0152	0.0209	0.0215	0.0135
SM 39:1;O2	SM	Positive	M+H	773.653	5.6	SM d18:1/18:1-d9	0.074364	0.0767	0.08965	0.1055	0.09055	0.0778	0.0759	0.0853	0.0884	0.0913	0.076	0.0807	0.0841	0.0911	0.09	0.0848	0.0912	0.0912	0.111	0.0952	0.0777	0.0729	0.0845	0.1	0.103	0.0708	0.0807	0.0856	0.0974	0.0986	0.0823	0.0932	0.0816	0.108	0.0772	0.0791
SM 40:0;O2	SM	Positive	M+H	789.684	6.03	SM d18:1/18:1-d9	0.134297	0.0303	0.0301	0.03905	0.03345	0.0261	0.0296	0.0261	0.037	0.0361	0.0255	0.0362	0.0265	0.0297	0.0391	0.0314	0.0314	0.0285	0.0405	0.041	0.0295	0.0311	0.0326	0.0404	0.0448	0.0254	0.0288	0.0285	0.0392	0.0409	0.03	0.0375	0.0273	0.0407	0.0329	0.0284
SM 40:1;O2	SM	Positive	M+H	787.669	5.82	SM d18:1/18:1-d9	0.126842	1.255	1.345	1.67	1.515	1.235	1.26	1.32	1.42	1.37	1.18	1.23	1.34	1.35	1.5	1.37	1.44	1.37	1.78	1.66	1.28	1.28	1.28	1.52	1.75	1.24	1.34	1.35	1.52	1.55	1.39	1.52	1.24	1.75	1.3	1.3
SM 40:2;O2	SM	Positive	M+H	785.653	5.37	SM d18:1/18:1-d9	0.0715673	0.1795	0.1915	0.259	0.185	0.182	0.171	0.18	0.206	0.177	0.173	0.18	0.185	0.216	0.175	0.194	0.185	0.181	0.262	0.205	0.18	0.164	0.178	0.244	0.227	0.178	0.173	0.167	0.217	0.204	0.187	0.21	0.165	0.237	0.16	0.18
SM 41:1;O2	SM	Positive	M+H	801.684	6.12	SM d18:1/18:1-d9	0.098185	0.872	0.814	1.055	0.8755	0.7375	0.787	0.787	0.898	0.862	0.694	0.897	0.862	0.845	0.945	0.87	1	0.839	1.07	1.11	0.793	0.91	0.748	0.932	1.09	0.73	0.874	0.76	0.988	0.996	0.813	1.05	0.793	1.11	0.8	0.777
SM 41:2;O2	SM	Positive	M+H	799.669	5.67	SM d18:1/18:1-d9	0.0954435	0.1755	0.21	0.2335	0.1865	0.1875	0.167	0.197	0.191	0.194	0.187	0.168	0.191	0.194	0.175	0.195	0.18	0.195	0.237	0.202	0.173	0.155	0.193	0.213	0.218	0.171	0.182	0.189	0.214	0.206	0.195	0.193	0.172	0.231	0.158	0.188
SM 41:3;O2	SM	Positive	M+H	797.653	5.12	SM d18:1/18:1-d9	0.000527803	0.004575	0.005515	0.00559	0.00459	0.003915	0.00356	0.0061	0.00456	0.00517	0.00344	0.00285	0.00489	0.00615	0.00462	0.00367	0.00505	0.00352	0.00601	0.0046	0.00459	0.00257	0.00392	0.00571	0.00633	0.00349	0.00362	0.00464	0.00413	0.00546	0.00405	0.00458	0.00398	0.0057	0.00396	0.00383
SM 42:0;O2	SM	Positive	M+H	817.716	6.65	SM d18:1/18:1-d9	0.0979536	0.0211	0.0182	0.02765	0.02375	0.01845	0.0178	0.0175	0.0226	0.0231	0.0164	0.0197	0.0198	0.0216	0.0223	0.0192	0.0218	0.0156	0.0317	0.0285	0.0168	0.0201	0.0195	0.0252	0.028	0.0149	0.0218	0.0183	0.0256	0.0279	0.0207	0.026	0.0153	0.0284	0.0249	0.0218
SM 42:0;O3	SM	Positive	M+H	833.711	6.16	SM d18:1/18:1-d9	0.144608	0.0183	0.0157	0.0216	0.01865	0.0164	0.0153	0.0154	0.0201	0.0173	0.018	0.0192	0.0167	0.0199	0.0187	0.0189	0.0187	0.0185	0.0271	0.0213	0.0187	0.0186	0.0138	0.0213	0.0216	0.0186	0.0189	0.0149	0.022	0.0241	0.0215	0.025	0.0148	0.0227	0.0174	0.019
SM 42:1;O3	SM	Positive	M+H	831.695	5.57	SM d18:1/18:1-d9	0.0995618	0.02265	0.023	0.0242	0.0237	0.0206	0.0222	0.019	0.02	0.0274	0.0203	0.0255	0.0222	0.023	0.0221	0.0207	0.0272	0.0187	0.0251	0.0226	0.0173	0.0202	0.0198	0.0224	0.0283	0.0155	0.0259	0.0195	0.0226	0.026	0.0206	0.0273	0.0161	0.0259	0.0172	0.0196
SM 42:2;O2	SM	Positive	M+H	813.684	5.84	SM d18:1/18:1-d9	0.121673	3.745	4.01	4.425	4.28	3.505	3.74	3.89	3.79	3.76	3.34	3.63	3.91	3.49	4.12	3.82	4.25	4.02	4.55	4.44	3.53	3.76	3.84	4.06	4.82	3.52	4.02	3.87	4	4.24	4.05	4.42	3.62	4.62	3.57	3.7
SM 42:3;O2	SM	Positive	M+H	811.669	5.37	SM d18:1/18:1-d9	0.0822274	0.341	0.3745	0.4105	0.3505	0.3135	0.301	0.354	0.317	0.337	0.287	0.319	0.344	0.339	0.331	0.332	0.346	0.339	0.413	0.373	0.306	0.305	0.344	0.378	0.434	0.302	0.315	0.321	0.35	0.364	0.311	0.389	0.319	0.378	0.316	0.302
SM 42:4;O2	SM	Positive	M+H	809.653	4.92	SM d18:1/18:1-d9	0.13982	0.0184	0.0161	0.0175	0.0184	0.0132	0.015	0.0173	0.0188	0.0149	0.0135	0.0115	0.0132	0.0166	0.0135	0.0122	0.0133	0.0118	0.0205	0.0163	0.0142	0.0145	0.0137	0.0182	0.0228	0.0144	0.0175	0.0137	0.0156	0.0216	0.0115	0.0168	0.0106	0.0139	0.0118	0.0126
SM 42:5;O2	SM	Positive	M+H	807.637	4.62	SM d18:1/18:1-d9	0.13625	0.00935	0.006235	0.009035	0.00962	0.002945	0.00799	0.00649	0.00672	0.000663	0.00217	0.00841	0.00642	0.00864	0.00874	0.00192	0.0103	0.00542	0.0101	0.00821	0.00208	0.00819	0.00841	0.00669	0.0108	0.00175	0.011	0.00618	0.00645	0.012	0.00161	0.00903	0.00496	0.00735	0.0121	0.00256
SM 43:1;O2	SM	Positive	M+H	829.716	6.64	SM d18:1/18:1-d9	0.0918389	0.0894	0.0777	0.0973	0.0869	0.06565	0.0916	0.0693	0.0883	0.0839	0.0724	0.0913	0.0758	0.0918	0.0893	0.0766	0.106	0.0805	0.107	0.104	0.0679	0.0815	0.0674	0.0967	0.102	0.0628	0.0906	0.0692	0.0954	0.0978	0.0717	0.115	0.0693	0.106	0.0837	0.0764
SM 43:2;O2	SM	Positive	M+H	827.7	6.05	SM d18:1/18:1-d9	0.119856	0.0457	0.0414	0.05095	0.0465	0.03595	0.0404	0.0353	0.0406	0.0418	0.0295	0.0424	0.0376	0.0356	0.0441	0.0377	0.05	0.0377	0.044	0.0487	0.0333	0.044	0.0375	0.0465	0.0559	0.0309	0.0435	0.0315	0.0419	0.0501	0.0376	0.0524	0.0328	0.0489	0.0369	0.0347
LPC 16:0	LPC	Positive	M+H	496.34	2.61	LPC 18:1-d7	0.0970123	2.54	1.915	1.93	2.07	2.19	2.44	1.73	1.87	2.34	2.22	2.65	2.25	2.21	1.96	2.36	2.65	1.74	1.88	1.95	2.27	2.96	1.97	2	2.44	2.4	3.05	2.05	2.15	2.56	2.37	3.33	2.32	2.21	2.29	2.89
LPC 17:0	LPC	Positive	M+H	510.355	2.68	LPC 18:1-d7	0.0999341	0.04525	0.03405	0.0354	0.0414	0.0352	0.0521	0.0367	0.0333	0.0455	0.0366	0.0458	0.0383	0.034	0.0408	0.0319	0.0497	0.0371	0.0399	0.0453	0.0318	0.0475	0.0297	0.0284	0.0401	0.0327	0.0586	0.0363	0.0371	0.0473	0.0351	0.0543	0.0408	0.0355	0.0415	0.037
LPC 18:0	LPC	Positive	M+H	524.371	2.78	LPC 18:1-d7	0.0426242	1.505	1.49	1.815	1.47	1.5	1.57	1.29	1.81	1.91	1.6	1.67	1.53	2.05	1.36	1.61	1.75	1.43	1.9	1.66	1.41	1.74	1.37	1.59	1.58	1.59	1.69	1.45	1.9	1.59	1.54	1.64	1.64	1.74	1.41	1.5
LPC 19:0	LPC	Positive	M+H	538.387	2.88	LPC 18:1-d7	0.000576901	0.01435	0.01285	0.0151	0.0146	0.01615	0.0143	0.0121	0.0144	0.0166	0.017	0.0145	0.0119	0.0149	0.012	0.0148	0.0142	0.0158	0.0153	0.0135	0.0161	0.0137	0.0121	0.0132	0.0154	0.0138	0.0156	0.0135	0.0135	0.0147	0.014	0.0135	0.0149	0.0127	0.0155	0.0165
LPC 20:0	LPC	Positive	M+H	552.402	3	LPC 18:1-d7	0.0146184	0.005135	0.005015	0.005895	0.005585	0.006185	0.00613	0.00492	0.00526	0.00603	0.00663	0.00494	0.00467	0.00689	0.00435	0.00726	0.00511	0.00459	0.0055	0.00574	0.0059	0.00653	0.00487	0.00592	0.00604	0.007	0.00578	0.00552	0.00511	0.00574	0.00617	0.00504	0.00534	0.00633	0.00514	0.00649
LPC 20:2	LPC	Positive	M+H	548.371	2.68	LPC 18:1-d7	0.0494588	0.006495	0.002475	0.007845	0.00458	0.00993	0.00581	0.0042	0.00813	0.00552	0.0125	0.00454	0.00392	0.00778	0.00323	0.011	0.00716	0.00205	0.0136	0.00745	0.0148	0.00895	0.00839	0.0162	0.00437	0.0191	0.0163	0.0106	0.0223	0.0103	0.0222	0.0139	0.0144	0.0204	0.0126	0.029
LPC 22:0	LPC	Positive	M+H	580.434	3.3	LPC 18:1-d7	0.0166847	0.00346	0.003055	0.00372	0.003875	0.003655	0.00405	0.00247	0.00262	0.00378	0.00323	0.00294	0.00313	0.0032	0.00337	0.00385	0.00293	0.00342	0.00303	0.0029	0.00322	0.00317	0.00427	0.00303	0.00328	0.00244	0.0037	0.00356	0.00354	0.00314	0.00327	0.00286	0.00349	0.00393	0.00356	0.00334
LPC 24:0	LPC	Positive	M+H	608.465	3.65	LPC 18:1-d7	0.0689748	0.005785	0.006345	0.00632	0.00553	0.005595	0.00669	0.00554	0.00569	0.00606	0.00554	0.00568	0.00472	0.00598	0.00464	0.006	0.00481	0.00597	0.00509	0.00441	0.00402	0.00604	0.00532	0.00468	0.00513	0.00521	0.00634	0.0054	0.00569	0.00474	0.00517	0.00538	0.00483	0.00492	0.00503	0.00482
LPC 24:1	LPC	Positive	M+H	606.449	3.3	LPC 18:1-d7	0.124775	0.001565	0.001225	0.001032	0.0011465	0.00131	0.00136	0.00103	0.00136	0.00143	0.000749	0.000881	0.00125	0.00129	0.000793	0.00241	0.00106	0.00143	0.00123	0.000906	0.00141	0.00111	0.000724	0.00114	0.00108	0.00105	0.000884	0.000922	0.00119	0.0015	0.00131	0.00136	0.000872	0.00111	0.0011	0.00113
PC 25:0	PC	Positive	M+H	636.46	3.2	PC 15:0/18:1-d7	0.0158038	3.53e-05	0.00016735	0.0001242	0.0001545	9.335e-05	0.000188	7.06e-05	0.000395	0.000105	0.000282	0.00114	0.000898	0.000517	0.000486	0.00029	0.000321	0.000495	0.000494	0.000431	0.000475	0.000266	3.53e-05	3.53e-05	0.000158	0.000772	0.000361	0.000608	0.000231	0.000711	0.000318	0.000448	0.00058	0.00051	0.000474	0.000507
PC 28:0	PC	Positive	M+H	678.507	3.8	PC 15:0/18:1-d7	0.0224343	0.000181	0.0001865	0.000333	0.0001865	0.000371	0.000231	0.000129	0.000307	0.000215	0.000433	6.45e-05	0.000138	0.000349	0.000146	0.000446	0.000272	0.000158	0.000294	0.000201	0.000355	0.000245	0.00024	0.000256	0.000149	0.000292	0.000255	0.000223	0.000263	0.000164	0.000377	0.000206	0.000207	0.000282	0.000265	0.00028
PC 30:0	PC	Positive	M+H	706.538	4.17	PC 15:0/18:1-d7	0.00256232	0.0263	0.0243	0.039	0.0298	0.0368	0.0296	0.0238	0.0336	0.03	0.0376	0.0291	0.0237	0.0389	0.0272	0.0337	0.034	0.0239	0.0402	0.0308	0.036	0.0304	0.0326	0.0394	0.0301	0.0342	0.0265	0.0268	0.0335	0.0254	0.0347	0.0256	0.0236	0.0397	0.0368	0.0348
PC 30:1	PC	Positive	M+H	704.522	3.87	PC 15:0/18:1-d7	0.0393257	0.005305	0.00442	0.00535	0.00471	0.0089	0.00538	0.00427	0.00471	0.00477	0.00837	0.00454	0.00414	0.0056	0.00375	0.00761	0.00572	0.00341	0.00558	0.00397	0.00909	0.00549	0.00448	0.0051	0.00461	0.00849	0.00493	0.0042	0.00526	0.00436	0.00885	0.00474	0.00435	0.00601	0.00481	0.00941
PC 31:0	PC	Positive	M+H	720.554	4.39	PC 15:0/18:1-d7	0.0468202	0.01735	0.011	0.0109	0.0153	0.01115	0.0172	0.0104	0.0119	0.0149	0.00942	0.0185	0.0116	0.0134	0.0127	0.0111	0.019	0.0102	0.0103	0.0125	0.0127	0.0217	0.0122	0.00999	0.0154	0.0103	0.0187	0.0121	0.0123	0.0129	0.0116	0.0167	0.0116	0.0113	0.0158	0.0133
PC 31:1	PC	Positive	M+H	718.538	4.05	PC 15:0/18:1-d7	0.0243503	0.00366	0.00224	0.001705	0.00219	0.003705	0.00374	0.00169	0.00176	0.00206	0.00299	0.00338	0.00189	0.00198	0.00182	0.00354	0.00371	0.00155	0.00212	0.00216	0.00331	0.00412	0.00179	0.00162	0.00239	0.00307	0.00387	0.00188	0.00234	0.00231	0.00337	0.00349	0.00176	0.00229	0.00235	0.00372
PC 31:2	PC	Positive	M+H	716.522	3.72	PC 15:0/18:1-d7	0.0317157	0.08345	0.113	0.127	0.1	0.119	0.0817	0.105	0.103	0.103	0.121	0.0544	0.081	0.103	0.0876	0.105	0.065	0.0852	0.109	0.0872	0.102	0.0657	0.104	0.119	0.102	0.115	0.0806	0.0876	0.103	0.0894	0.117	0.0641	0.0838	0.104	0.0998	0.107
PC 32:0	PC	Positive	M+H	734.569	4.59	PC 15:0/18:1-d7	0.0333389	0.816	0.639	0.658	0.767	0.6145	0.841	0.59	0.617	0.724	0.605	0.806	0.619	0.703	0.666	0.598	0.949	0.607	0.669	0.731	0.65	0.837	0.789	0.569	0.767	0.596	0.823	0.654	0.699	0.7	0.621	0.779	0.579	0.707	0.805	0.651
PC 32:1	PC	Positive	M+H	732.554	4.26	PC 15:0/18:1-d7	0.0127521	0.371	0.295	0.385	0.287	0.5135	0.419	0.24	0.304	0.309	0.485	0.36	0.264	0.38	0.269	0.539	0.359	0.297	0.339	0.306	0.523	0.399	0.318	0.304	0.358	0.535	0.38	0.291	0.359	0.307	0.545	0.333	0.275	0.388	0.319	0.553
PC 32:2	PC	Positive	M+H	730.538	3.93	PC 15:0/18:1-d7	0.00222114	0.09415	0.0734	0.0962	0.0823	0.111	0.0852	0.071	0.0841	0.0834	0.0982	0.0731	0.0617	0.0923	0.0674	0.095	0.0876	0.0591	0.0898	0.0696	0.106	0.0916	0.0812	0.0832	0.0832	0.108	0.0813	0.0715	0.0834	0.0791	0.109	0.082	0.0721	0.0917	0.0879	0.113
PC 33:0	PC	Positive	M+H	748.585	4.8	PC 15:0/18:1-d7	0.0848841	0.01605	0.010435	0.010585	0.013	0.0114	0.0156	0.0104	0.0091	0.0125	0.00947	0.0156	0.0106	0.0113	0.0118	0.0131	0.0195	0.0106	0.0106	0.0134	0.0109	0.017	0.012	0.00986	0.0135	0.0124	0.0173	0.0116	0.0118	0.0123	0.0111	0.0152	0.012	0.0134	0.0142	0.0113
PC 33:1	PC	Positive	M+H	746.569	4.47	PC 15:0/18:1-d7	0.00489884	0.1055	0.0645	0.0623	0.07375	0.08775	0.106	0.0613	0.0594	0.0765	0.0876	0.102	0.0568	0.0588	0.0701	0.0901	0.106	0.0607	0.0579	0.0753	0.0886	0.106	0.0623	0.0601	0.0799	0.0909	0.11	0.0584	0.0614	0.076	0.0952	0.104	0.06	0.0605	0.0807	0.0921
PC 33:2	PC	Positive	M+H	744.554	4.14	PC 15:0/18:1-d7	0.00241934	0.04255	0.0316	0.02315	0.0383	0.0259	0.0438	0.0283	0.0221	0.0421	0.0251	0.0383	0.0278	0.0235	0.0342	0.0272	0.0495	0.0247	0.024	0.0336	0.0263	0.0471	0.0362	0.0223	0.0378	0.0263	0.0429	0.0306	0.0217	0.0347	0.0274	0.0407	0.0275	0.0273	0.0426	0.025
PC 33:3	PC	Positive	M+H	742.538	3.77	PC 15:0/18:1-d7	0.0222248	0.1385	0.1535	0.1655	0.167	0.139	0.133	0.128	0.134	0.149	0.132	0.0819	0.101	0.15	0.129	0.107	0.127	0.0947	0.145	0.138	0.126	0.117	0.168	0.144	0.155	0.132	0.116	0.112	0.143	0.138	0.123	0.0964	0.106	0.147	0.148	0.126
PC 34:0	PC	Positive	M+H	762.601	5.1	PC 15:0/18:1-d7	0.046686	0.0897	0.0853	0.0922	0.0919	0.075	0.101	0.0834	0.083	0.0835	0.068	0.0961	0.0871	0.0928	0.0775	0.0763	0.118	0.0839	0.102	0.0884	0.0798	0.107	0.0963	0.0831	0.102	0.072	0.108	0.09	0.0926	0.0865	0.0765	0.105	0.0842	0.102	0.0932	0.0842
PC 34:1	PC	Positive	M+H	760.585	4.69	PC 15:0/18:1-d7	0.0228594	5.295	3.91	4.525	5.165	5.625	6.26	4.06	4.12	4.72	5.49	6.23	4.12	5	4.28	5.87	6.3	4.6	5.37	5.06	5.11	5.86	4.74	4.25	5.34	5.96	5.88	4.51	4.79	5.34	5.81	5.67	3.79	5.33	5.16	6.25
PC 34:2	PC	Positive	M+H	758.569	4.33	PC 15:0/18:1-d7	0.0110921	4.22	3.75	3.92	4.92	3.765	4.54	3.75	3.9	4.87	3.49	3.61	3.52	4.08	4.21	3.46	4.31	3.52	3.93	4.31	3.91	4.84	4.39	3.62	4.66	3.78	4.48	4.2	3.59	3.87	3.78	3.3	3.69	3.89	5.44	3.83
PC 34:3	PC	Positive	M+H	756.554	4.03	PC 15:0/18:1-d7	0.0246442	0.347	0.333	0.396	0.39	0.3495	0.332	0.316	0.367	0.38	0.321	0.256	0.276	0.383	0.334	0.319	0.343	0.261	0.42	0.339	0.321	0.344	0.36	0.355	0.388	0.331	0.316	0.332	0.35	0.346	0.345	0.288	0.297	0.387	0.392	0.33
PC 34:4	PC	Positive	M+H	754.538	3.9	PC 15:0/18:1-d7	0.054215	0.0366	0.0335	0.0421	0.03655	0.0383	0.0336	0.0295	0.0353	0.0361	0.0351	0.0206	0.0249	0.0406	0.0286	0.0297	0.0323	0.0211	0.0429	0.0292	0.0366	0.031	0.0352	0.0398	0.0362	0.0374	0.0294	0.0267	0.0319	0.0329	0.0365	0.0238	0.0286	0.0409	0.0371	0.0362
PC 35:1	PC	Positive	M+H	774.601	4.94	PC 15:0/18:1-d7	0.0229998	0.0903	0.0617	0.0689	0.0794	0.07095	0.0887	0.0605	0.0676	0.0754	0.0709	0.0815	0.0538	0.073	0.068	0.0709	0.0975	0.0575	0.0725	0.0733	0.0714	0.0939	0.064	0.0665	0.0906	0.0703	0.096	0.062	0.0683	0.0768	0.0727	0.0894	0.0596	0.0784	0.0765	0.0742
PC 35:2	PC	Positive	M+H	772.585	4.56	PC 15:0/18:1-d7	0.0104178	0.114	0.0962	0.0971	0.1095	0.0976	0.113	0.0829	0.089	0.0989	0.0951	0.101	0.0781	0.0969	0.0985	0.0858	0.121	0.0775	0.0974	0.104	0.0986	0.116	0.106	0.0891	0.107	0.0958	0.112	0.0826	0.0932	0.104	0.0957	0.102	0.0806	0.106	0.109	0.0985
PC 35:3	PC	Positive	M+H	770.569	4.23	PC 15:0/18:1-d7	0.00189586	0.02735	0.02455	0.02785	0.02615	0.02365	0.0294	0.0211	0.0221	0.0265	0.0235	0.024	0.019	0.0243	0.0224	0.02	0.0265	0.0189	0.0263	0.0261	0.0219	0.0277	0.0268	0.0241	0.0262	0.0225	0.0242	0.021	0.0214	0.0247	0.0212	0.0215	0.021	0.0245	0.0302	0.0232
PC 35:4	PC	Positive	M+H	768.554	4.08	PC 15:0/18:1-d7	0.00162016	0.0304	0.01845	0.0159	0.025	0.0155	0.0267	0.018	0.0134	0.0236	0.0133	0.0171	0.0147	0.0152	0.0205	0.0136	0.0283	0.013	0.0171	0.0201	0.0139	0.027	0.0199	0.0127	0.0267	0.0146	0.0254	0.0188	0.0121	0.0214	0.0134	0.0205	0.0158	0.0158	0.025	0.0159
PC 36:0	PC	Positive	M+H	790.632	5.62	PC 15:0/18:1-d7	0.0997509	0.0052	0.005795	0.00649	0.005395	0.004355	0.00546	0.00529	0.00609	0.00534	0.0039	0.00521	0.00519	0.00624	0.0051	0.00481	0.00664	0.00585	0.00729	0.00551	0.00489	0.00657	0.0062	0.00624	0.006	0.00406	0.00598	0.0061	0.00727	0.00516	0.00506	0.00579	0.0055	0.00824	0.00548	0.00551
PC 36:1	PC	Positive	M+H	788.616	5.21	PC 15:0/18:1-d7	0.0743678	0.6915	0.652	1.1495	0.6705	0.8345	0.738	0.582	0.975	0.669	0.82	0.648	0.64	1.06	0.591	0.856	0.838	0.686	1.26	0.677	0.781	0.768	0.73	1.07	0.791	0.786	0.738	0.632	1.08	0.682	0.806	0.745	0.664	1.16	0.661	0.913
PC 36:2	PC	Positive	M+H	786.601	4.81	PC 15:0/18:1-d7	0.0340174	3.205	3.04	3.985	3.37	3.175	3.01	2.98	3.49	3.15	2.78	2.79	2.86	4.01	2.75	3.24	3.88	2.94	3.86	3.16	2.9	3.45	3.3	3.72	3.11	3.23	3.44	3.09	4.16	3.02	3.08	3	3.13	4.64	3.69	3.12
PC 36:3	PC	Positive	M+H	784.585	4.46	PC 15:0/18:1-d7	0.00137469	2.225	1.965	2.4	2.285	2.425	2.27	1.86	2.37	2.14	2.19	1.87	1.87	2.53	1.9	1.96	2.17	1.62	2.36	2.11	2.38	2.24	2.04	2.31	2.29	2.16	2.05	1.81	2.34	1.91	2.3	1.9	1.84	2.2	2.22	2.39
PC 36:4	PC	Positive	M+H	782.569	4.28	PC 15:0/18:1-d7	0.0150402	4.675	4.53	4.855	4.005	3.455	5.02	3.52	3.53	4.22	3.23	3.09	3.54	4.53	3.66	3.32	3.76	3.71	4.26	4.22	3.32	4.02	4.91	4.09	4.98	3.65	4.28	3.87	4.1	4.15	3.51	3.17	3.87	4.53	4.42	3.56
PC 36:5	PC	Positive	M+H	780.554	3.98	PC 15:0/18:1-d7	0.00940057	0.293	0.2415	0.381	0.2735	0.357	0.242	0.221	0.333	0.279	0.3	0.144	0.171	0.35	0.23	0.274	0.226	0.148	0.359	0.232	0.315	0.217	0.252	0.345	0.262	0.325	0.205	0.212	0.287	0.249	0.329	0.183	0.217	0.351	0.306	0.328
PC 36:6	PC	Positive	M+H	778.538	3.74	PC 15:0/18:1-d7	0.0733692	0.0227	0.02255	0.0269	0.02565	0.0235	0.0223	0.0223	0.0257	0.0263	0.0227	0.0172	0.0202	0.0248	0.0226	0.0211	0.0251	0.0177	0.0297	0.0232	0.023	0.023	0.0242	0.0243	0.0264	0.023	0.0219	0.0222	0.0238	0.0241	0.0246	0.0206	0.0211	0.0259	0.0249	0.0235
PC 37:1	PC	Positive	M+H	802.632	5.48	PC 15:0/18:1-d7	0.0842903	0.006565	0.00602	0.009995	0.006325	0.00835	0.00661	0.00555	0.00839	0.0062	0.00757	0.00616	0.00583	0.00883	0.0055	0.00822	0.00782	0.00592	0.0105	0.00606	0.00793	0.0068	0.00668	0.00896	0.0069	0.0076	0.00712	0.00601	0.00901	0.00573	0.00832	0.00695	0.00577	0.0103	0.00626	0.00933
PC 37:2	PC	Positive	M+H	800.616	5.06	PC 15:0/18:1-d7	0.0661061	0.0244	0.0266	0.03335	0.0244	0.03105	0.0259	0.0252	0.0295	0.0228	0.0291	0.0215	0.0235	0.0335	0.0206	0.0291	0.0281	0.024	0.0353	0.0226	0.0314	0.0267	0.0286	0.0309	0.0261	0.0288	0.0257	0.0249	0.0313	0.0222	0.0295	0.0252	0.0241	0.0368	0.0245	0.0331
PC 37:3	PC	Positive	M+H	798.601	4.66	PC 15:0/18:1-d7	0.0298302	0.01555	0.01505	0.0211	0.0138	0.0211	0.0165	0.0134	0.019	0.0129	0.0203	0.0126	0.0128	0.019	0.011	0.0203	0.0165	0.0121	0.0235	0.0117	0.0214	0.0133	0.0166	0.0195	0.014	0.0186	0.0142	0.0144	0.0201	0.0143	0.0205	0.0154	0.0118	0.0205	0.0158	0.0211
PC 37:4	PC	Positive	M+H	796.585	4.51	PC 15:0/18:1-d7	0.0119045	0.123	0.1075	0.111	0.113	0.07095	0.12	0.0986	0.0947	0.114	0.0694	0.078	0.0797	0.1	0.101	0.0632	0.101	0.0769	0.102	0.107	0.0627	0.0992	0.101	0.109	0.118	0.0686	0.112	0.0866	0.0928	0.107	0.0684	0.0912	0.0849	0.0955	0.118	0.0647
PC 37:6	PC	Positive	M+H	792.554	3.93	PC 15:0/18:1-d7	0.0129055	0.0531	0.02605	0.02255	0.0377	0.0189	0.0431	0.0293	0.0242	0.0384	0.0164	0.0221	0.0171	0.0198	0.0295	0.0143	0.0449	0.0151	0.0199	0.0299	0.0165	0.038	0.0288	0.0202	0.0389	0.0186	0.0372	0.0201	0.0152	0.0351	0.0173	0.0315	0.0216	0.0184	0.0401	0.0176
PC 38:0	PC	Positive	M+H	818.663	6.21	PC 15:0/18:1-d7	0.0854287	0.0001965	0.000188	0.0001475	0.0001775	0.0001765	0.000134	9.28e-05	0.000213	0.000175	0.000123	0.000264	0.000207	0.000116	8.64e-05	0.000163	0.000251	0.000129	6.53e-05	0.00013	0.000203	0.000282	0.00014	0.000127	0.000156	0.000229	0.000192	0.000116	0.000124	0.000172	0.00021	0.000216	0.000154	0.000213	0.000207	8.58e-05
PC 38:1	PC	Positive	M+H	816.648	5.68	PC 15:0/18:1-d7	0.103889	0.01145	0.01165	0.01885	0.01185	0.01525	0.0124	0.0104	0.0167	0.011	0.014	0.0107	0.0102	0.0175	0.00986	0.0148	0.0133	0.0113	0.0181	0.0108	0.0143	0.0124	0.0124	0.0161	0.0122	0.0142	0.0119	0.0109	0.0189	0.0112	0.0155	0.0112	0.0102	0.0224	0.0113	0.0181
PC 38:2	PC	Positive	M+H	814.632	5.24	PC 15:0/18:1-d7	0.075238	0.0546	0.05365	0.09675	0.0544	0.0878	0.0556	0.0476	0.0796	0.0528	0.0815	0.0498	0.0494	0.0912	0.0472	0.0861	0.0616	0.0529	0.103	0.0535	0.0843	0.0588	0.0617	0.0889	0.0626	0.085	0.0553	0.0508	0.0892	0.0547	0.0818	0.0565	0.0502	0.101	0.0513	0.0957
PC 38:3	PC	Positive	M+H	812.616	4.93	PC 15:0/18:1-d7	0.0014803	0.5335	0.5815	0.867	0.5645	0.6515	0.514	0.566	0.921	0.534	0.629	0.403	0.48	0.851	0.45	0.594	0.535	0.494	0.996	0.497	0.628	0.497	0.612	0.792	0.631	0.632	0.545	0.539	0.88	0.533	0.628	0.459	0.521	1.03	0.527	0.634
PC 38:4	PC	Positive	M+H	810.601	4.75	PC 15:0/18:1-d7	0.0379701	3.075	3.235	4.21	3.315	2.35	3.22	3.35	3.73	3.15	2.16	2.36	2.75	4.6	2.7	2.18	3.13	3.13	4.75	3.19	1.96	2.94	3.78	3.68	3.38	2.47	3.06	3.13	3.79	3.08	2.1	2.59	2.9	4.46	3.44	2.46
PC 38:5	PC	Positive	M+H	808.585	4.39	PC 15:0/18:1-d7	0.00779666	2.25	1.765	2.48	1.96	1.78	2.23	1.63	2.29	1.91	1.59	1.3	1.41	2.46	1.56	1.44	1.81	1.24	2.34	1.61	1.68	2.01	1.94	2.26	1.87	1.67	1.87	1.62	1.89	1.52	1.67	1.35	1.54	2.19	2.04	1.65
PC 38:6	PC	Positive	M+H	806.569	4.14	PC 15:0/18:1-d7	0.00609075	3.935	3.205	3.53	3.67	2.71	3.42	2.8	3.07	3.88	2.49	2	2.35	3.1	3.01	2.32	3.45	2	3.62	2.78	2.29	3.25	3.37	3.08	3.69	2.6	3.35	2.71	2.66	3.03	2.5	2.62	2.5	3.38	3.53	2.38
PC 38:7	PC	Positive	M+H	804.554	3.85	PC 15:0/18:1-d7	0.0124014	0.0991	0.07925	0.1135	0.094	0.09145	0.0868	0.071	0.0881	0.0928	0.0894	0.0428	0.0507	0.103	0.0736	0.0688	0.0744	0.0406	0.115	0.0716	0.0814	0.0716	0.0834	0.108	0.0927	0.0902	0.0711	0.0582	0.0751	0.0793	0.0837	0.0502	0.0627	0.0908	0.0959	0.0802
PC 39:2	PC	Positive	M+H	828.648	5.6	PC 15:0/18:1-d7	0.0668006	0.0003795	0.0003965	0.0006645	0.0005195	0.000564	0.000415	0.00033	0.000564	0.000523	0.000638	0.000369	0.000376	0.000779	0.000503	0.000679	0.000498	0.000409	0.000785	0.000615	0.000758	0.000335	0.00051	0.000518	0.000703	0.000604	0.000687	0.000286	0.000551	0.000788	0.000481	0.000624	0.000308	0.000734	0.00079	0.000887
PC 39:3	PC	Positive	M+H	826.632	5.19	PC 15:0/18:1-d7	0.119704	0.001245	0.001425	0.002255	0.001255	0.002265	0.00119	0.00116	0.00185	0.00104	0.00231	0.00101	0.00133	0.00223	0.000827	0.00202	0.00134	0.00139	0.00204	0.00105	0.00323	0.00119	0.00136	0.00206	0.00136	0.00174	0.00121	0.00123	0.00165	0.00124	0.0025	0.00107	0.00136	0.00228	0.00119	0.00236
PC 39:4	PC	Positive	M+H	824.616	5.01	PC 15:0/18:1-d7	0.0428452	0.02245	0.02385	0.02785	0.02075	0.01795	0.0215	0.0218	0.0251	0.0196	0.0171	0.0141	0.0188	0.0268	0.0169	0.015	0.0202	0.0173	0.0284	0.0178	0.0167	0.0204	0.0248	0.0264	0.0221	0.0164	0.0212	0.0204	0.0237	0.0186	0.0169	0.0182	0.0203	0.0281	0.0197	0.0166
PC 39:5	PC	Positive	M+H	822.601	4.55	PC 15:0/18:1-d7	0.004946	0.0145	0.0121	0.01695	0.01185	0.01465	0.0128	0.0112	0.0147	0.0104	0.0124	0.00847	0.00809	0.0169	0.00905	0.0117	0.0122	0.00783	0.0176	0.0102	0.0137	0.0119	0.0135	0.0161	0.0113	0.013	0.0104	0.00912	0.0133	0.00961	0.0147	0.0106	0.00864	0.0165	0.00719	0.0127
PC 39:6	PC	Positive	M+H	820.585	4.31	PC 15:0/18:1-d7	0.0323189	0.0533	0.0282	0.03555	0.04525	0.0243	0.0547	0.03	0.0304	0.0439	0.0231	0.0282	0.0213	0.0311	0.037	0.0197	0.0414	0.0199	0.0318	0.0379	0.0227	0.0498	0.0363	0.0344	0.0405	0.0249	0.0482	0.0281	0.0264	0.0348	0.0243	0.0293	0.0251	0.0292	0.047	0.0228
PC 39:7	PC	Positive	M+H	818.569	4.02	PC 15:0/18:1-d7	0.0164835	0.0146	0.00735	0.01175	0.01015	0.0126	0.0114	0.00975	0.0159	0.0125	0.00852	0.00514	0.00483	0.00955	0.00878	0.0114	0.00947	0.00427	0.0106	0.0119	0.00731	0.00876	0.00875	0.00985	0.00982	0.00907	0.00816	0.007	0.00805	0.00856	0.0101	0.00773	0.00595	0.0158	0.00965	0.00826
PC 40:4	PC	Positive	M+H	838.632	5.25	PC 15:0/18:1-d7	0.0549212	0.0285	0.02955	0.04295	0.0319	0.03515	0.0286	0.0268	0.0387	0.0263	0.0339	0.0184	0.0247	0.0391	0.0268	0.0338	0.028	0.0231	0.0423	0.0263	0.0325	0.0258	0.0309	0.0365	0.0364	0.0299	0.026	0.025	0.0346	0.0258	0.0348	0.0238	0.0237	0.0395	0.028	0.037
PC 40:6	PC	Positive	M+H	834.601	4.56	PC 15:0/18:1-d7	0.00667836	1.21	1.115	1.45	1.215	0.985	1.14	0.932	1.22	1.08	0.964	0.695	0.738	1.35	0.992	0.736	1.07	0.686	1.33	1.04	0.873	0.988	1.18	1.36	1.16	0.935	0.999	0.782	1.22	1.05	0.914	0.829	0.819	1.35	1.12	0.888
PC 40:7	PC	Positive	M+H	832.585	4.2	PC 15:0/18:1-d7	0.0293472	1.028	0.6985	1.125	0.816	0.8025	1	0.676	0.87	0.828	0.78	0.499	0.461	0.902	0.665	0.557	0.78	0.402	1.02	0.781	0.674	0.78	0.874	1.03	0.835	0.702	0.677	0.564	0.638	0.696	0.683	0.553	0.565	0.881	0.901	0.649
PC 40:8	PC	Positive	M+H	830.569	3.93	PC 15:0/18:1-d7	0.0417558	0.2185	0.208	0.25	0.23	0.233	0.177	0.182	0.192	0.231	0.202	0.0704	0.117	0.207	0.173	0.156	0.14	0.092	0.221	0.171	0.197	0.133	0.216	0.226	0.236	0.219	0.134	0.137	0.146	0.207	0.205	0.103	0.16	0.199	0.232	0.208
PC 42:10	PC	Positive	M+H	854.569	3.81	PC 15:0/18:1-d7	0.00494055	0.0251	0.02725	0.02825	0.0347	0.03325	0.0213	0.024	0.0203	0.0328	0.034	0.00517	0.0123	0.0222	0.0231	0.0208	0.0142	0.0102	0.0272	0.0218	0.0258	0.0145	0.0286	0.0263	0.0328	0.0324	0.0164	0.0134	0.0132	0.0251	0.0281	0.00813	0.0186	0.0171	0.032	0.0262
PC 42:4	PC	Positive	M+H	866.663	5.6	PC 15:0/18:1-d7	0.126185	0.001875	0.001815	0.00227	0.00237	0.00159	0.00188	0.00143	0.00155	0.00226	0.0012	0.00117	0.00151	0.00167	0.00168	0.00132	0.002	0.00142	0.00189	0.00189	0.0014	0.0017	0.00184	0.00159	0.00228	0.0014	0.0018	0.00157	0.00173	0.00194	0.00139	0.00143	0.00144	0.00186	0.0021	0.0017
PC 42:5	PC	Positive	M+H	864.648	5.1	PC 15:0/18:1-d7	0.0220473	0.002885	0.00275	0.002925	0.003125	0.00241	0.00269	0.00234	0.00212	0.0031	0.00211	0.00192	0.00215	0.00237	0.00246	0.0022	0.00254	0.00216	0.00292	0.00311	0.00218	0.00274	0.00308	0.0025	0.00353	0.00232	0.00255	0.00231	0.00223	0.00294	0.00215	0.00212	0.00234	0.00295	0.00258	0.00228
PC 42:7	PC	Positive	M+H	860.616	4.62	PC 15:0/18:1-d7	0.0116138	0.0189	0.0145	0.0234	0.0134	0.0198	0.0148	0.0111	0.0201	0.0148	0.0178	0.0073	0.00892	0.021	0.0119	0.0131	0.0143	0.00809	0.0213	0.0136	0.0166	0.0116	0.0172	0.02	0.0154	0.0166	0.0117	0.0105	0.0162	0.0127	0.0174	0.00992	0.011	0.019	0.0155	0.0149
PC 42:8	PC	Positive	M+H	858.601	4.23	PC 15:0/18:1-d7	0.0509664	0.01068	0.008235	0.01305	0.00896	0.008625	0.00977	0.00636	0.00483	0.00722	0.00704	0.001235	0.001235	0.00645	0.00479	0.00362	0.00353	0.001235	0.00755	0.00473	0.00406	0.00394	0.00773	0.00764	0.0097	0.00689	0.00533	0.001235	0.00272	0.0066	0.00452	0.00258	0.00247	0.00518	0.00601	0.00464
PC 44:11	PC	Positive	M+H	880.585	3.91	PC 15:0/18:1-d7	0.0536459	0.00294	0.002525	0.002455	0.00311	0.003965	0.00237	0.00212	0.00181	0.00337	0.00348	0.000474	0.00101	0.00169	0.00231	0.00194	0.00126	0.000778	0.00166	0.00169	0.00263	0.00163	0.00246	0.0024	0.00273	0.00339	0.00209	0.0015	0.000666	0.00228	0.00289	0.00149	0.0013	0.00139	0.00306	0.00274
PC 44:12	PC	Positive	M+H	878.569	3.6	PC 15:0/18:1-d7	0.0537175	0.002205	0.00206	0.00228	0.00348	0.003775	0.00203	0.00164	0.00566	0.00305	0.00335	0.0022	0.000689	0.00148	0.00215	0.00236	0.0038	0.00261	0.0066	0.00221	0.0032	0.00416	0.00219	0.00201	0.00358	0.00331	0.00132	0.0011	0.00442	0.00282	0.00311	0.00289	0.00342	0.00496	0.00307	0.00284
PC 44:8	PC	Positive	M+H	886.632	4.58	PC O-18:0/18:1-d9	0.136223	0.0004865	0.000635	0.000186	0.0007605	0.00010365	9.54e-05	0.000173	0.000263	0.000583	0.000148	2.36e-05	9.1e-05	0.000114	0.000735	0.000126	0.000268	0.000121	0.000255	0.000402	0.000197	5.45e-05	0.000549	2.36e-05	0.000355	5.83e-05	0.000159	0.000218	0.000125	0.000595	0.000197	2.36e-05	0.000291	4.72e-05	0.000625	0.000159
LPE 20:0	LPE	Negative	M-H	508.341	3.06	LPE 18:1-d7	0.00835067	0.2135	0.196	0.249	0.2	0.203	0.238	0.17	0.296	0.169	0.2	0.334	0.221	0.238	0.226	0.25	0.278	0.223	0.255	0.237	0.213	0.253	0.178	0.261	0.221	0.206	0.299	0.215	0.289	0.214	0.223	0.267	0.242	0.295	0.255	0.241
LPE 20:2	LPE	Negative	M-H	504.31	2.74	LPE 18:1-d7	0.147981	0.076	0.07325	0.08715	0.1145	0.07745	0.0723	0.0691	0.0869	0.142	0.0806	0.0994	0.0958	0.102	0.154	0.104	0.128	0.0789	0.144	0.19	0.106	0.173	0.141	0.149	0.196	0.174	0.24	0.212	0.222	0.215	0.236	0.226	0.259	0.223	0.0847	0.256
PE 32:0	PE	Negative	M-H	690.508	4.82	PE 15:0/18:1-d7	0.0609645	0.172	0.145	0.14	0.139	0.171	0.17	0.14	0.122	0.133	0.158	0.189	0.143	0.133	0.121	0.178	0.152	0.146	0.121	0.144	0.183	0.186	0.138	0.127	0.154	0.172	0.164	0.146	0.139	0.134	0.197	0.181	0.157	0.134	0.136	0.192
PE 32:1	PE	Negative	M-H	688.492	4.42	PE 15:0/18:1-d7	0.0843182	0.3485	0.369	0.489	0.3055	0.9145	0.342	0.346	0.459	0.353	0.86	0.347	0.353	0.457	0.285	0.948	0.34	0.326	0.499	0.316	0.952	0.344	0.357	0.446	0.3	0.902	0.378	0.359	0.489	0.295	0.898	0.316	0.369	0.508	0.323	0.951
PE 34:1	PE	Negative	M-H	716.524	4.9	PE 15:0/18:1-d7	0.0207197	6.48	5.425	6.405	5.08	9.565	6.11	5.11	5.97	4.65	8.9	6.5	5.06	6.26	4.29	9	5.89	4.93	6.24	4.78	9.34	6.78	5.18	6.16	5.27	8.8	6.34	5.53	6.01	4.7	9.38	5.83	5.18	5.86	4.97	9.66
PE 34:2	PE	Negative	M-H	714.508	4.51	PE 15:0/18:1-d7	0.0114394	7.075	9.39	10.35	8.245	10.25	6.96	9.58	9.01	8.24	9.15	6.7	8.6	10.1	7.07	10.1	6.34	8.74	9.63	8.29	10.1	6.69	9.67	9.5	8.36	9.67	7.25	8.74	9.21	7.69	9.94	5.98	8.98	9.91	7.86	10.6
PE 34:3	PE	Negative	M-H	712.492	4.16	PE 15:0/18:1-d7	0.0620759	0.428	0.6545	0.75	0.522	0.8795	0.425	0.566	0.58	0.526	0.808	0.391	0.582	0.658	0.485	0.846	0.433	0.53	0.677	0.508	0.819	0.41	0.622	0.651	0.567	0.814	0.406	0.556	0.62	0.484	0.791	0.374	0.611	0.627	0.532	0.829
PE 35:2	PE	Negative	M-H	728.524	4.74	PE 15:0/18:1-d7	0.0614592	0.2595	0.259	0.221	0.246	0.212	0.217	0.253	0.191	0.256	0.192	0.198	0.224	0.182	0.156	0.208	0.205	0.231	0.192	0.195	0.231	0.23	0.236	0.189	0.235	0.218	0.219	0.196	0.141	0.201	0.206	0.183	0.191	0.188	0.159	0.232
PE 36:1	PE	Negative	M-H	744.555	5.41	PE 15:0/18:1-d7	0.00178232	3.045	2.435	3.12	2.815	2.8	2.67	2.38	2.63	2.77	2.64	2.8	2.45	3.03	2.67	2.49	2.61	2.15	2.79	2.84	2.93	2.72	2.51	2.81	3.53	2.57	2.91	2.49	2.78	3.06	3.03	3	2.65	2.89	3.25	2.99
PE 36:2	PE	Negative	M-H	742.539	4.99	PE 15:0/18:1-d7	0.0154475	13.4	12.75	14	13.65	11.7	12.8	12.3	13	13.5	10.4	12	11.8	13.7	12.1	11.2	11	11	14.2	13.5	11.6	11.7	12.5	13.5	15.2	10.6	12.4	12.2	12.4	13	12.3	12.3	12.5	13.5	14	11.9
PE 36:3	PE	Negative	M-H	740.524	4.59	PE 15:0/18:1-d7	0.0069073	11.6	12.4	13.9	12.95	11.5	11.2	11.6	12.2	13.1	10.5	9.92	10.8	13.1	11.2	11.1	10.7	10.6	12.7	12.3	11.1	10.8	12.1	12.9	13.3	10.9	11.3	11.1	11.8	11.8	11.2	9.41	11.3	11.9	12.7	11.3
PE 36:4	PE	Negative	M-H	738.508	4.43	PE 15:0/18:1-d7	0.0538214	26.95	31.75	38.55	25.25	38.95	25.4	29.9	33.3	28.4	34.2	20.1	26.4	33.8	22.8	35.1	22.3	22.8	33.8	25.3	36.7	24.1	31.5	34	27.7	37.6	26.2	28	32.7	23.9	36.2	20.3	27.7	34.8	26.2	38.3
PE 36:5	PE	Negative	M-H	736.492	4.1	PE 15:0/18:1-d7	0.0668827	1.5	1.695	2.655	1.57	2.79	1.32	1.5	2.14	1.59	2.51	0.922	1.27	2.31	1.43	2.4	1.09	1.14	2.31	1.45	2.62	1.19	1.62	2.45	1.74	2.74	1.18	1.32	1.87	1.44	2.61	1	1.48	2.11	1.55	2.44
PE 37:4	PE	Negative	M-H	752.524	4.66	PE 15:0/18:1-d7	0.0225508	1.605	1.23	1.295	1.28	1.23	1.39	1.17	1.2	1.34	1.13	1.07	1.01	1.22	1.04	1.04	1.29	0.956	1.15	1.18	1.07	1.4	1.19	1.19	1.35	1.13	1.47	1.02	1.04	1.22	1.07	1.21	1.11	1.1	1.33	1.16
PE 38:2	PE	Negative	M-H	770.571	5.52	PE 15:0/18:1-d7	0.0201631	0.6605	0.514	0.8295	0.6045	0.7905	0.576	0.495	0.685	0.595	0.663	0.539	0.474	0.799	0.537	0.715	0.526	0.414	0.744	0.613	0.781	0.61	0.512	0.792	0.706	0.726	0.594	0.512	0.697	0.663	0.818	0.606	0.554	0.768	0.666	0.76
PE 38:4	PE	Negative	M-H	766.539	4.92	PE 15:0/18:1-d7	0.0293588	83.65	85.5	91.75	87.3	75.35	76.8	79.3	84.2	80.4	67.8	65.9	70.4	87.5	72	64.2	64.7	65.2	88.8	81.4	71.2	76.3	80.2	92.7	94.3	66.6	76.5	77.1	77.9	83.6	72.8	69.6	74.9	81.5	92.2	71.5
PE 38:6	PE	Negative	M-H	762.508	4.27	PE 15:0/18:1-d7	0.0467543	45.4	42.65	54.5	48.75	41.85	42.1	42.1	44.1	48.7	39.4	34.2	37.3	46.5	42.3	37.3	38.2	34.1	47.5	43.5	41.3	39.2	44.5	47	55.3	39.9	44	40.2	43.3	41.4	41.6	33.9	40.6	44.3	44.1	42.7
PE 40:5	PE	Negative	M-H	792.555	4.89	PE 15:0/18:1-d7	0.00331055	3.35	2.675	3.59	2.92	2.85	2.98	2.54	3.02	2.87	2.51	2.26	2.23	3.3	2.56	2.41	2.57	1.99	3.38	2.82	2.59	2.76	2.68	3.31	3.56	2.66	3.12	2.43	2.85	3.11	2.89	2.67	2.66	3.05	3.25	2.81
PE 40:6	PE	Negative	M-H	790.539	4.74	PE 15:0/18:1-d7	0.00861157	13.05	11.15	12.65	13.3	8.94	11.6	10.6	10.8	14.3	8.54	9.09	8.9	10.4	11.4	8	10.3	8.47	11.7	13.6	8.12	11.8	10.8	11.7	15.2	9.22	14	9.88	9.22	15.3	9.1	11.2	10.9	11.3	16.8	9.54
PE 40:7	PE	Negative	M-H	788.524	4.36	PE 15:0/18:1-d7	0.0171911	14.25	11.85	16.35	14.1	11.3	13.2	11.7	13.6	14.7	9.54	8.05	8.75	13.8	12.6	9.31	10.6	7.86	14.1	12.2	10.6	10.5	11.7	15	15	10	11.8	9.63	11.2	11.8	10.6	9.15	10.2	13.1	14.2	10.9
PE 40:8	PE	Negative	M-H	786.508	4.07	PE 15:0/18:1-d7	0.0456207	0.692	0.76	0.8625	0.82	0.6925	0.635	0.662	0.628	0.832	0.575	0.327	0.485	0.655	0.687	0.501	0.45	0.427	0.704	0.687	0.537	0.465	0.727	0.709	0.954	0.648	0.563	0.531	0.482	0.768	0.624	0.397	0.58	0.597	0.873	0.578
PE 42:10	PE	Negative	M-H	810.508	3.95	PE 15:0/18:1-d7	0.057928	0.0715	0.0835	0.08455	0.08805	0.0895	0.0547	0.0546	0.0536	0.0881	0.0548	0.0111	0.0256	0.0639	0.0704	0.048	0.0332	0.0263	0.0647	0.0644	0.0626	0.0491	0.0835	0.0643	0.0985	0.0753	0.0608	0.0457	0.0327	0.0957	0.0789	0.0464	0.064	0.0486	0.0782	0.074
PE 42:7	PE	Negative	M-H	816.555	4.81	PE 15:0/18:1-d7	0.0619429	0.2365	0.19	0.264	0.2	0.1925	0.211	0.165	0.242	0.227	0.178	0.116	0.142	0.212	0.186	0.168	0.161	0.114	0.229	0.193	0.177	0.177	0.183	0.235	0.214	0.185	0.206	0.134	0.152	0.186	0.175	0.168	0.151	0.204	0.192	0.166
PE 42:8	PE	Negative	M-H	814.539	4.23	PE 15:0/18:1-d7	0.0993507	0.172	0.1555	0.196	0.168	0.12	0.154	0.124	0.141	0.165	0.0911	0.0577	0.0901	0.141	0.124	0.0905	0.105	0.0848	0.155	0.131	0.0923	0.115	0.142	0.158	0.157	0.114	0.131	0.0979	0.101	0.134	0.084	0.0769	0.0991	0.142	0.15	0.114
DG 34:2	DG	Positive	M+NH4	610.54	5.48	DG 15:0/18:1-d7	0.118682	9.905	7.765	10.91	26.45	7.23	8.25	8.05	11.9	24.7	7.19	9.12	9.76	11	11.7	7.45	11.4	11.2	8.49	14.6	6.98	11	10.8	11	16.1	8.05	10.5	9.22	8.74	6.09	8.6	10	7.57	8.82	8.39	7.21
DG 34:3	DG	Positive	M+NH4	608.525	5.05	DG 15:0/18:1-d7	0.0100132	3.465	3.44	4.155	13.2	1.845	3.11	3.63	6.17	11.1	2.54	3.06	3.53	4.89	5.34	1.75	2.43	4.33	3.87	6.05	1.91	4.06	4.62	5.2	6.34	2.12	3.87	4.93	3.81	2.98	2.56	3.45	3.46	3.71	3.29	1.83
DG 36:3	DG	Positive	M+NH4	636.556	5.6	DG 15:0/18:1-d7	0.0924906	27.05	25.4	32.7	168	9.585	23.4	32.7	37	159	10.4	25.7	35.5	33.1	76.7	9.31	30.8	44.4	28.3	120	8.7	29.7	40.6	38.4	101	11.4	36.4	39.2	26.2	43	10.7	29	34.1	33.4	61.2	8.56
DG 38:4	DG	Positive	M+NH4	662.572	5.9	DG 15:0/18:1-d7	0.0675032	9.245	8.075	11.295	15.9	5.355	10	7.52	14.1	16.6	7.12	8.93	7.81	11.9	11	6.59	10.9	11	10.2	18.5	6.09	11.7	10.4	14.1	17.3	7.29	11.2	10.3	11.4	9.21	9.26	9.86	8.89	15	11.2	6.11
DG 38:5	DG	Positive	M+NH4	660.556	5.38	DG 15:0/18:1-d7	0.0109167	11.6	11.85	11.75	48.85	8.98	9.79	13.4	12.8	57.1	9.13	11.9	15.8	12.3	31.8	8.93	11.1	19	9.3	43.9	8.85	12	19	13.9	57.7	9.74	11.4	25.8	9.14	26.2	11.8	11.3	28.9	11.4	40.1	8.39
DG 40:7	DG	Positive	M+NH4	684.556	5.19	DG 15:0/18:1-d7	0.0477611	10.6	13.1	15.35	50.5	6.575	8.2	15.1	18	58	6.88	7.84	15.7	13.8	28.7	6.63	9.19	21.5	12.5	42.8	6.18	10	19.2	16.8	51.5	6.75	9.02	22.7	10.2	22.4	7.38	7.88	28.1	11	28	5.08
DG 40:8	DG	Positive	M+NH4	682.54	4.76	DG 15:0/18:1-d7	0.138614	0.2855	2.475	2.63	24.65	0.2105	0.665	6.27	4.45	28.3	0.059	0.35	4.06	3.58	13.1	0.259	0.118	7.24	3.11	18	0.472	0.17	8.22	2.94	23.2	0.059	0.348	9.19	1.7	10.7	0.059	0.938	11.9	1.49	15.7	0.059
TG 46:0	TG	Positive	M+NH4	796.739	9.16	TG 15:0/18:1-d7/15:0	0.0491638	0.02775	0.0184	0.0351	0.04015	0.0257	0.0311	0.0183	0.0313	0.034	0.0261	0.0237	0.00915	0.0295	0.0318	0.0284	0.0354	0.00915	0.0332	0.0321	0.0321	0.0339	0.00915	0.0303	0.0218	0.0264	0.0305	0.00915	0.0338	0.0201	0.0257	0.0319	0.00915	0.0285	0.00915	0.0293
TG 46:1	TG	Positive	M+NH4	794.723	8.82	TG 15:0/18:1-d7/15:0	0.0466581	0.05835	0.0278	0.0865	0.037	0.0566	0.0721	0.0279	0.0743	0.023	0.0483	0.0643	0.0177	0.0807	0.0174	0.0561	0.0547	0.0162	0.0788	0.0141	0.0589	0.0593	0.026	0.0701	0.0151	0.0566	0.0629	0.00705	0.0781	0.00705	0.0624	0.0659	0.00705	0.0746	0.00705	0.0575
TG 48:0	TG	Positive	M+NH4	824.77	9.53	TG 15:0/18:1-d7/15:0	0.0433282	0.1545	0.09545	0.1625	0.1765	0.129	0.182	0.1	0.146	0.177	0.125	0.17	0.0845	0.156	0.144	0.131	0.175	0.0829	0.136	0.151	0.137	0.177	0.104	0.157	0.1	0.13	0.183	0.0684	0.152	0.0756	0.137	0.176	0.0521	0.129	0.0636	0.134
TG 48:1	TG	Positive	M+NH4	822.755	9.2	TG 15:0/18:1-d7/15:0	0.0120204	0.7115	0.3295	0.863	0.3075	0.611	0.705	0.285	0.855	0.231	0.607	0.709	0.232	0.847	0.151	0.654	0.682	0.202	0.87	0.137	0.621	0.767	0.271	0.843	0.0956	0.634	0.757	0.145	0.833	0.0579	0.667	0.761	0.0933	0.851	0.051	0.657
TG 48:2	TG	Positive	M+NH4	820.739	8.86	TG 15:0/18:1-d7/15:0	0.0350774	0.7485	0.2715	0.9245	0.2485	0.5295	0.811	0.243	0.778	0.155	0.456	0.764	0.172	0.818	0.112	0.53	0.771	0.145	0.791	0.0916	0.542	0.681	0.23	0.75	0.0811	0.513	0.76	0.131	0.835	0.0462	0.578	0.82	0.075	0.755	0.0348	0.59
TG 48:3	TG	Positive	M+NH4	818.723	8.48	TG 14:0/16:1/14:0-d5	0.00288837	0.1965	0.0747	0.185	0.0723	0.09095	0.177	0.0675	0.16	0.047	0.0806	0.164	0.0527	0.183	0.0316	0.0751	0.167	0.0428	0.177	0.0295	0.0992	0.18	0.0589	0.163	0.0294	0.0875	0.166	0.0297	0.16	0.0131	0.0861	0.173	0.0189	0.143	0.0137	0.0892
TG 48:4	TG	Positive	M+NH4	816.708	8.09	TG 14:0/16:1/14:0-d5	0.0254557	0.0205	0.0117	0.02035	0.01054	0.00745	0.0207	0.00938	0.0179	0.00572	0.0066	0.0179	0.00613	0.019	0.00093	0.00186	0.022	0.00254	0.0168	0.00496	0.00429	0.0184	0.00841	0.0161	0.00266	0.00718	0.0182	0.00093	0.0152	0.00093	0.00788	0.0177	0.00093	0.0185	0.00093	0.00093
TG 49:0	TG	Positive	M+NH4	838.786	9.7	TG 15:0/18:1-d7/15:0	0.110015	0.005095	0.002275	0.00537	0.007225	0.0072	0.00783	0.00455	0.00653	0.00564	0.00701	0.00705	0.00476	0.00521	0.00772	0.00573	0.00666	0.00566	0.00729	0.00509	0.00688	0.00775	0.00474	0.00512	0.00587	0.0067	0.00932	0.00491	0.00663	0.0065	0.00695	0.00833	0.002275	0.00652	0.002275	0.00539
TG 49:1	TG	Positive	M+NH4	836.77	9.39	TG 15:0/18:1-d7/15:0	0.0447485	0.1575	0.05265	0.0954	0.0573	0.08785	0.192	0.0515	0.0973	0.0404	0.0793	0.162	0.0402	0.106	0.0263	0.0835	0.168	0.0373	0.091	0.0244	0.0863	0.162	0.0557	0.107	0.0206	0.0857	0.169	0.0389	0.0999	0.0124	0.0867	0.181	0.0186	0.0983	0.0117	0.0832
TG 49:3	TG	Positive	M+NH4	832.739	8.7	TG 14:0/16:1/14:0-d5	0.0193027	0.05425	0.01775	0.0393	0.0172	0.0196	0.0601	0.0161	0.0346	0.00934	0.0182	0.0573	0.0133	0.0357	0.00718	0.0168	0.0551	0.00935	0.0378	0.0055	0.0239	0.0582	0.0131	0.033	0.00268	0.0209	0.0556	0.00607	0.0337	0.000639	0.0231	0.0556	0.00245	0.0344	0.00179	0.0176
TG 50:1	TG	Positive	M+NH4	850.786	9.57	TG 15:0/18:1-d7/15:0	0.0403794	4.385	2.29	4.205	2.165	2.875	5.12	2.03	3.92	1.65	2.82	4.7	1.7	3.72	1.17	3.04	5.29	1.61	3.59	1.16	3.01	5.14	2.03	4.04	0.848	3.04	4.82	1.46	4.04	0.552	3.05	4.93	0.937	3.42	0.422	3.16
TG 50:2	TG	Positive	M+NH4	848.77	9.25	TG 15:0/18:1-d7/15:0	0.0262654	7.97	3.4	8.165	3.005	5.08	8.83	2.97	8.59	2.15	4.85	7.28	2.49	8.07	1.48	5.63	8.47	2.29	7.72	1.26	5.62	8.05	3.16	7.47	1.02	5.55	8.42	1.84	8.44	0.676	6.25	8.88	1.08	8.02	0.465	6.1
TG 50:3	TG	Positive	M+NH4	846.755	8.9	TG 15:0/18:1-d7/15:0	0.0483135	5.065	1.55	4.175	1.395	1.635	5.35	1.47	3.72	0.926	1.42	4.51	1.05	3.79	0.655	1.6	4.73	0.836	3.78	0.507	1.62	4.06	1.49	3.6	0.432	1.62	4.75	0.836	3.78	0.26	1.76	4.8	0.439	3.33	0.188	1.73
TG 50:4	TG	Positive	M+NH4	844.739	8.54	TG 14:0/16:1/14:0-d5	0.0200173	0.8675	0.2735	0.6505	0.2635	0.214	0.811	0.245	0.615	0.183	0.191	0.745	0.194	0.603	0.121	0.185	0.739	0.156	0.622	0.117	0.226	0.777	0.223	0.566	0.0991	0.212	0.731	0.113	0.536	0.051	0.224	0.753	0.0705	0.533	0.0499	0.211
TG 51:0	TG	Positive	M+NH4	866.817	10.02	TG 20:0/20:1/20:0-d5	0.0817678	0.002195	0.00127	0.00139	0.001885	0.000884	0.00253	0.00066	0.00149	0.00189	0.00161	0.00198	0.00108	0.000936	0.00145	0.00112	0.00223	0.00024	0.00155	0.00123	0.00172	0.00313	0.000992	0.0014	0.000538	0.00122	0.00181	0.00113	0.00102	0.000571	0.00152	0.00322	0.00048	0.00149	0.000642	0.00195
TG 51:1	TG	Positive	M+NH4	864.801	9.74	TG 15:0/18:1-d7/15:0	0.0122395	0.211	0.0738	0.144	0.07975	0.0956	0.261	0.0635	0.135	0.0593	0.0874	0.214	0.0562	0.141	0.0388	0.0957	0.201	0.0521	0.133	0.0378	0.101	0.212	0.0706	0.129	0.0261	0.094	0.232	0.0452	0.133	0.0174	0.102	0.234	0.0258	0.129	0.0153	0.0979
TG 51:2	TG	Positive	M+NH4	862.786	9.45	TG 15:0/18:1-d7/15:0	0.0155952	1.58	0.448	1.085	0.393	0.689	1.91	0.389	1.02	0.268	0.658	1.66	0.305	1.12	0.171	0.642	1.59	0.294	0.957	0.144	0.738	1.47	0.43	1.06	0.12	0.653	1.66	0.251	1.06	0.0659	0.668	1.74	0.123	1.03	0.0576	0.676
TG 51:3	TG	Positive	M+NH4	860.77	9.11	TG 15:0/18:1-d7/15:0	0.0394467	0.973	0.2365	0.5525	0.228	0.2	1.08	0.215	0.465	0.145	0.196	0.856	0.164	0.521	0.0932	0.222	0.867	0.147	0.444	0.0856	0.235	0.903	0.219	0.475	0.0588	0.217	1.02	0.111	0.5	0.0294	0.237	0.966	0.0587	0.467	0.0296	0.218
TG 51:4	TG	Positive	M+NH4	858.755	8.75	TG 14:0/16:1/14:0-d5	0.0238991	0.1545	0.04605	0.0969	0.04245	0.0298	0.172	0.0443	0.0803	0.0273	0.0269	0.142	0.0304	0.0794	0.0158	0.0297	0.138	0.0244	0.0856	0.016	0.0349	0.134	0.0397	0.0928	0.0131	0.0315	0.158	0.0188	0.0788	0.00778	0.0357	0.177	0.0127	0.0807	0.00632	0.0338
TG 52:0	TG	Positive	M+NH4	880.833	10.17	TG 20:0/20:1/20:0-d5	0.0722146	0.0137	0.009475	0.0117	0.0166	0.009175	0.0171	0.00965	0.0125	0.015	0.00897	0.0139	0.00813	0.0109	0.0119	0.00712	0.0166	0.00625	0.012	0.012	0.0114	0.0138	0.00875	0.0119	0.00846	0.00842	0.0166	0.00776	0.0107	0.00599	0.00959	0.0172	0.00494	0.0097	0.00448	0.00923
TG 52:1	TG	Positive	M+NH4	878.817	9.91	TG 20:0/20:1/20:0-d5	0.0157066	1.61	0.762	1.455	0.9375	0.86	1.94	0.67	1.35	0.742	0.759	1.76	0.555	1.56	0.542	0.888	1.81	0.559	1.41	0.454	0.927	1.45	0.83	1.53	0.327	0.945	1.71	0.522	1.46	0.223	0.881	1.99	0.305	1.38	0.168	0.87
TG 52:2	TG	Positive	M+NH4	876.801	9.61	TG 15:0/18:1-d7/15:0	0.00222692	33.2	15.55	36.05	14.45	19.55	44.5	15.9	35.6	9.86	17.5	37.9	11.6	29.1	7.19	19.4	36.7	11.7	30.1	7.47	18.6	32.7	14.7	34.4	5.34	19.3	36.8	11.2	30.3	4.22	21	37.7	6.64	31.9	2.88	21.5
TG 52:3	TG	Positive	M+NH4	874.786	9.29	TG 15:0/18:1-d7/15:0	0.000251245	32.25	15.1	28.8	14.6	11.75	41.4	13.5	29.5	10.5	11.3	31	11.6	26.3	7.33	11.8	38	10.8	24.6	6.91	12.6	31.9	14.3	26.5	5.62	12.6	34.4	9.99	28.9	3.6	13.4	40.6	5.39	26.3	2.51	13.5
TG 52:4	TG	Positive	M+NH4	872.77	8.95	TG 15:0/18:1-d7/15:0	0.00864161	15.65	5.2	10.205	5.13	2.745	17.4	4.69	9.51	3.57	2.44	13.1	3.48	9.62	2.53	2.61	14	3.07	9.37	2.06	2.88	12.9	4.94	9.6	1.71	2.86	14.3	2.92	8.87	1.01	2.86	13.7	1.61	8.42	0.812	2.87
TG 52:5	TG	Positive	M+NH4	870.755	8.6	TG 14:0/16:1/14:0-d5	0.0557378	2.465	0.8765	1.69	0.8505	0.371	2.36	0.786	1.53	0.641	0.285	2.16	0.616	1.52	0.423	0.382	2.18	0.523	1.58	0.397	0.308	2.38	0.725	1.51	0.347	0.446	2.07	0.383	1.41	0.19	0.483	2.17	0.241	1.45	0.176	0.269
TG 52:6	TG	Positive	M+NH4	868.739	8.35	TG 14:0/16:1/14:0-d5	0.0281135	0.22	0.1035	0.1735	0.1085	0.05395	0.222	0.0908	0.155	0.0792	0.0524	0.196	0.0706	0.0154	0.0578	0.0478	0.209	0.0622	0.164	0.057	0.0537	0.216	0.0827	0.154	0.0528	0.053	0.209	0.0502	0.162	0.0308	0.0587	0.193	0.0373	0.148	0.031	0.0541
TG 53:3	TG	Positive	M+NH4	888.801	9.47	TG 15:0/18:1-d7/15:0	0.0194436	2.01	0.5575	1.275	0.5515	0.536	2.28	0.481	1.19	0.403	0.495	2.02	0.404	1.25	0.265	0.507	1.95	0.374	1.04	0.225	0.527	1.92	0.54	1.17	0.169	0.543	1.98	0.312	1.19	0.101	0.546	2.1	0.173	1.06	0.0847	0.54
TG 53:4	TG	Positive	M+NH4	886.786	9.1	TG 15:0/18:1-d7/15:0	0.0272444	0.8225	0.2395	0.4695	0.2295	0.1385	0.954	0.205	0.41	0.153	0.131	0.675	0.157	0.43	0.109	0.146	0.806	0.143	0.387	0.101	0.168	0.768	0.203	0.402	0.0755	0.152	0.806	0.115	0.433	0.041	0.158	0.79	0.0634	0.395	0.0388	0.157
TG 53:5	TG	Positive	M+NH4	884.77	8.8	TG 15:0/18:1-d7/15:0	0.00885943	0.1515	0.0567	0.1045	0.0516	0.0334	0.184	0.0544	0.0941	0.0362	0.0315	0.15	0.0384	0.0958	0.0203	0.0299	0.152	0.0329	0.0869	0.0219	0.0341	0.148	0.0495	0.0905	0.02	0.0334	0.153	0.0306	0.0907	0.0104	0.0361	0.163	0.0177	0.0845	0.00737	0.032
TG 54:3	TG	Positive	M+NH4	902.817	9.67	TG 15:0/18:1-d7/15:0	0.015461	33.05	12.2	23.1	14.8	9.53	39.3	11.7	21.5	9.98	8.24	35.5	9.85	19.7	8.11	9.22	35.1	8.8	19.7	7.99	9.58	29.3	11.9	22.7	5.72	9.09	35.1	9.01	21.7	4.29	9.65	39.8	5.66	19.8	3.09	10.3
TG 54:4	TG	Positive	M+NH4	900.801	9.33	TG 15:0/18:1-d7/15:0	0.00405241	29.1	12	18	13.9	6.225	36.4	10.9	19.4	9.68	5.94	30.1	9.7	16.6	7.64	5.88	31.8	8.39	15.4	6.75	6.24	28.9	11.5	17.3	5.02	6.33	31.7	7.98	18.9	3.29	6.56	37.3	4.43	16.5	2.59	6.63
TG 54:5	TG	Positive	M+NH4	898.786	9.05	TG 15:0/18:1-d7/15:0	0.000907509	14.3	5.57	7.855	5.975	2.425	15.9	5.03	6.95	4.19	2.27	12.1	3.96	7.47	2.81	2.37	13.5	3.45	6.78	2.5	2.71	12.3	5.1	7.59	2.16	2.52	13.2	3.1	7	1.27	2.57	14.2	1.77	6.43	1.06	2.61
TG 54:7	TG	Positive	M+NH4	894.755	8.46	TG 14:0/16:1/14:0-d5	0.0107108	0.3425	0.22	0.307	0.204	0.0965	0.323	0.202	0.281	0.0264	0.0866	0.0264	0.165	0.297	0.0264	0.0739	0.309	0.135	0.292	0.0264	0.0955	0.318	0.19	0.266	0.102	0.0915	0.307	0.104	0.255	0.0264	0.0952	0.289	0.0662	0.245	0.0528	0.0903
TG 55:4	TG	Positive	M+NH4	914.817	9.53	TG 15:0/18:1-d7/15:0	0.0225047	0.4505	0.1435	0.236	0.1545	0.0962	0.522	0.137	0.217	0.113	0.0862	0.448	0.11	0.23	0.0793	0.0987	0.452	0.103	0.194	0.067	0.0969	0.44	0.144	0.227	0.049	0.098	0.457	0.086	0.212	0.0313	0.0984	0.48	0.0507	0.186	0.0286	0.0994
TG 55:5	TG	Positive	M+NH4	912.801	9.28	TG 15:0/18:1-d7/15:0	0.0128818	0.168	0.078	0.1055	0.07025	0.04715	0.192	0.0733	0.101	0.0516	0.0476	0.15	0.0609	0.102	0.0376	0.0482	0.161	0.0572	0.0885	0.0358	0.054	0.17	0.0744	0.0907	0.0276	0.054	0.173	0.0485	0.0936	0.0193	0.0593	0.179	0.0308	0.0897	0.0149	0.0557
TG 55:6	TG	Positive	M+NH4	910.786	9	TG 15:0/18:1-d7/15:0	0.0378125	0.0875	0.04495	0.0562	0.0397	0.0221	0.0953	0.0431	0.0524	0.0293	0.0165	0.0735	0.0326	0.056	0.0166	0.0178	0.0778	0.0272	0.0497	0.0155	0.0209	0.069	0.0434	0.0525	0.0187	0.0205	0.0826	0.0224	0.0522	0.011	0.0221	0.0836	0.0146	0.0449	0.00689	0.0202
TG 56:3	TG	Positive	M+NH4	930.848	9.98	TG 20:0/20:1/20:0-d5	0.145021	2.585	0.939	1.48	1.042	0.8275	2.58	0.698	1.27	0.71	0.689	2.57	0.738	1.29	0.537	0.782	2.57	0.559	1.57	0.501	0.753	2.21	0.858	1.43	0.365	0.736	2.5	0.511	1.39	0.217	0.665	3.08	0.284	1.54	0.24	0.806
TG 56:4	TG	Positive	M+NH4	928.833	9.69	TG 15:0/18:1-d7/15:0	0.0255717	3.145	1.385	2.095	1.555	1.0125	3.66	1.28	1.92	1.1	0.912	3.12	1.06	1.9	0.848	0.948	3.22	1	1.8	0.822	1.05	2.86	1.38	2.01	0.613	0.965	3.35	1.01	1.95	0.438	1.03	3.68	0.629	1.81	0.332	1.03
TG 56:6	TG	Positive	M+NH4	924.801	9.2	TG 15:0/18:1-d7/15:0	0.025753	3.99	2.515	2.69	2.17	1.06	4.34	2.33	2.46	1.68	0.984	3.65	1.91	2.6	1.15	1.05	3.79	1.7	2.45	1.16	1.11	3.84	2.36	2.5	0.999	1.07	4.07	1.44	2.49	0.647	1.18	4	0.985	2.35	0.594	1.11
TG 56:7	TG	Positive	M+NH4	922.786	8.92	TG 15:0/18:1-d7/15:0	0.0205825	1.935	1.66	1.8	1.26	0.542	2.23	1.55	1.62	0.941	0.476	1.71	1.12	1.64	0.67	0.51	1.82	0.969	1.55	0.612	0.537	1.63	1.58	1.57	0.591	0.533	1.81	0.991	1.51	0.397	0.568	1.86	0.64	1.41	0.31	0.57
TG 56:8	TG	Positive	M+NH4	920.77	8.57	TG 14:0/16:1/14:0-d5	0.0172005	0.5565	0.5405	0.6145	0.3695	0.1605	0.51	0.496	0.556	0.292	0.156	0.437	0.381	0.569	0.199	0.137	0.457	0.321	0.552	0.201	0.176	0.495	0.475	0.542	0.184	0.172	0.43	0.263	0.491	0.113	0.172	0.453	0.185	0.501	0.106	0.157
TG 56:9	TG	Positive	M+NH4	918.755	8.21	TG 14:0/16:1/14:0-d5	0.00752446	0.04385	0.0516	0.0663	0.03635	0.0123	0.0412	0.0414	0.051	0.0254	0.0113	0.0352	0.0327	0.0603	0.0207	0.0108	0.0402	0.0301	0.0537	0.0187	0.0141	0.0395	0.0408	0.0554	0.0205	0.012	0.0395	0.0255	0.0536	0.0123	0.0102	0.0345	0.0194	0.0534	0.0107	0.0111
TG 57:3	TG	Positive	M+NH4	944.864	10.13	TG 15:0/18:1-d7/15:0	0.0366533	0.0379	0.01135	0.0186	0.01055	0.00965	0.0464	0.00969	0.0173	0.00878	0.00783	0.0343	0.00729	0.0192	0.00552	0.00869	0.038	0.00584	0.0163	0.00421	0.0109	0.0336	0.0103	0.0201	0.00399	0.00962	0.0402	0.00478	0.0165	0.00167	0.0108	0.0384	0.00314	0.0169	0.00195	0.0101
TG 57:4	TG	Positive	M+NH4	942.848	9.85	TG 15:0/18:1-d7/15:0	0.104165	0.041	0.01415	0.0224	0.0138	0.013	0.0563	0.0124	0.0205	0.0106	0.00955	0.0425	0.0112	0.0206	0.00614	0.0107	0.0412	0.00783	0.0208	0.00696	0.0108	0.0366	0.0144	0.0239	0.00336	0.0118	0.0452	0.00755	0.0224	0.00199	0.0127	0.0419	0.00566	0.0196	0.00199	0.0112
TG 58:6	TG	Positive	M+NH4	952.833	9.47	TG 15:0/18:1-d7/15:0	0.00110386	0.789	0.5625	0.5765	0.4635	0.3165	0.939	0.523	0.533	0.361	0.292	0.781	0.416	0.566	0.254	0.293	0.8	0.399	0.499	0.222	0.31	0.737	0.573	0.542	0.197	0.302	0.793	0.374	0.541	0.122	0.321	0.815	0.235	0.483	0.103	0.306
TG 58:7	TG	Positive	M+NH4	950.817	9.17	TG 15:0/18:1-d7/15:0	0.000376466	0.804	0.74	0.6515	0.6115	0.272	0.958	0.701	0.625	0.462	0.27	0.704	0.569	0.605	0.351	0.27	0.843	0.5	0.559	0.345	0.288	0.76	0.696	0.582	0.302	0.285	0.815	0.478	0.605	0.205	0.306	0.85	0.306	0.554	0.164	0.302
TG 58:8	TG	Positive	M+NH4	948.801	9	TG 15:0/18:1-d7/15:0	0.00834859	0.855	0.8265	0.874	0.685	0.2265	0.951	0.798	0.772	0.517	0.201	0.684	0.598	0.803	0.376	0.208	0.779	0.538	0.751	0.325	0.232	0.708	0.842	0.828	0.332	0.23	0.751	0.535	0.73	0.217	0.225	0.809	0.339	0.678	0.179	0.235
TG 58:9	TG	Positive	M+NH4	946.786	8.66	TG 14:0/16:1/14:0-d5	0.00359985	0.3665	0.396	0.398	0.299	0.0856	0.352	0.367	0.349	0.242	0.0825	0.292	0.294	0.374	0.16	0.072	0.304	0.241	0.36	0.178	0.0965	0.333	0.364	0.359	0.169	0.09	0.306	0.193	0.294	0.103	0.0966	0.304	0.144	0.312	0.0937	0.0843
TG 59:4	TG	Positive	M+NH4	970.88	10.15	TG 15:0/18:1-d7/15:0	0.149092	0.00427	0.000835	0.001375	0.001061	0.0007265	0.00511	0.00115	0.00202	0.000494	0.0012	0.00466	0.000891	0.00137	9.45e-05	0.000754	0.00483	0.000204	0.00185	0.000198	0.000937	0.00365	0.000189	0.00195	9.45e-05	0.000497	0.00447	0.00023	0.00146	9.45e-05	0.00039	0.00327	0.00047	0.00162	9.45e-05	0.000514
TG 60:10	TG	Positive	M+NH4	972.801	8.85	TG 15:0/18:1-d7/15:0	0.0148479	0.0752	0.0708	0.0711	0.05845	0.0227	0.088	0.0685	0.0604	0.0457	0.0192	0.062	0.05	0.0655	0.0319	0.0192	0.0673	0.0422	0.0587	0.0296	0.0219	0.0623	0.069	0.0655	0.0319	0.0225	0.0724	0.0457	0.059	0.022	0.0223	0.0786	0.0392	0.0577	0.0188	0.0192
TG 60:11	TG	Positive	M+NH4	970.786	8.53	TG 15:0/18:1-d7/15:0	0.071429	0.0398	0.04145	0.03815	0.03585	0.010695	0.044	0.0412	0.0318	0.0282	0.00884	0.0274	0.0281	0.0377	0.0144	0.00837	0.0353	0.0212	0.031	0.0182	0.00851	0.0302	0.0423	0.037	0.0183	0.0102	0.0371	0.0259	0.0288	0.0154	0.01	0.039	0.0205	0.028	0.0119	0.00977
TG 60:4	TG	Positive	M+NH4	984.895	10.29	TG 20:0/20:1/20:0-d5	0.0792295	0.03235	0.016	0.01925	0.01405	0.0145	0.0402	0.014	0.0191	0.0103	0.0145	0.0308	0.0134	0.022	0.00556	0.0143	0.0305	0.0105	0.0166	0.00537	0.0212	0.0293	0.0149	0.0215	0.0032	0.0154	0.0317	0.0123	0.0197	0.00206	0.0158	0.0329	0.00826	0.0195	0.00117	0.0159
TG 60:5	TG	Positive	M+NH4	982.88	10.02	TG 15:0/18:1-d7/15:0	0.00103139	0.0496	0.0266	0.03295	0.0195	0.0219	0.0577	0.025	0.0286	0.0165	0.0211	0.0455	0.0198	0.0301	0.0111	0.0219	0.0453	0.0157	0.027	0.00937	0.0259	0.045	0.0271	0.031	0.00701	0.0219	0.0463	0.0174	0.0305	0.00485	0.0253	0.0512	0.0107	0.0269	0.00355	0.0258
TG 60:6	TG	Positive	M+NH4	980.864	9.75	TG 15:0/18:1-d7/15:0	0.0369553	0.1085	0.0701	0.0696	0.0609	0.03835	0.133	0.0609	0.0616	0.0446	0.034	0.0977	0.0521	0.0669	0.0296	0.0346	0.0983	0.0484	0.0597	0.0337	0.0422	0.0976	0.0688	0.0668	0.023	0.0384	0.111	0.0434	0.061	0.0158	0.0383	0.114	0.0282	0.0586	0.0121	0.0393
TG 60:7	TG	Positive	M+NH4	978.848	9.59	TG 15:0/18:1-d7/15:0	0.00319602	0.1655	0.1295	0.0993	0.1115	0.0497	0.197	0.119	0.0884	0.0935	0.0472	0.156	0.0909	0.097	0.0608	0.0476	0.174	0.0925	0.0844	0.0608	0.0464	0.161	0.131	0.0892	0.0529	0.0502	0.169	0.0796	0.0885	0.0346	0.0511	0.18	0.0564	0.0784	0.0299	0.0494
TG 60:8	TG	Positive	M+NH4	976.833	9.28	TG 15:0/18:1-d7/15:0	0.00360506	0.186	0.165	0.1355	0.149	0.0632	0.199	0.158	0.132	0.115	0.0305	0.158	0.131	0.128	0.0862	0.0633	0.177	0.11	0.127	0.0797	0.0597	0.178	0.164	0.129	0.0722	0.0644	0.193	0.106	0.124	0.0494	0.0712	0.184	0.0729	0.121	0.0421	0.0593
TG 70:3	TG	Positive	M+NH4	1127.07	11.71	TG 15:0/18:1-d7/15:0	0.0863944	0.05655	0.01485	0.0195	0.01775	0.013	0.0656	0.0132	0.0213	0.0136	0.013	0.0557	0.0102	0.0214	0.00981	0.0125	0.0594	0.0102	0.016	0.00932	0.0145	0.0508	0.0129	0.0193	0.00761	0.0131	0.0539	0.0107	0.0192	0.00529	0.0149	0.0579	0.00544	0.0157	0.00385	0.0128
TG 72:3	TG	Positive	M+NH4	1155.1	11.93	TG 15:0/18:1-d7/15:0	0.0604412	0.03305	0.00861	0.0124	0.0114	0.008295	0.0381	0.00858	0.0103	0.00827	0.00803	0.0284	0.00725	0.0115	0.00521	0.00766	0.0303	0.00701	0.00988	0.00422	0.0091	0.0287	0.00923	0.0127	0.00452	0.00927	0.0368	0.00638	0.0124	0.00278	0.00872	0.0318	0.00455	0.00924	0.0022	0.00909
TG O-50:1	TG	Positive	M+NH4	836.807	10.04	TG 15:0/18:1-d7/15:0	0.0525064	0.02545	0.01495	0.01965	0.015	0.01825	0.0312	0.0173	0.0211	0.013	0.0162	0.0243	0.0148	0.0203	0.0105	0.0171	0.0251	0.013	0.0207	0.00984	0.0229	0.0261	0.018	0.0229	0.0115	0.0196	0.0269	0.0155	0.0195	0.00951	0.0202	0.0288	0.0118	0.0195	0.00803	0.0204
TG O-50:2	TG	Positive	M+NH4	862.822	10.06	TG 15:0/18:1-d7/15:0	0.0788481	0.0643	0.03705	0.05085	0.03685	0.04425	0.0717	0.0433	0.0504	0.0332	0.036	0.0593	0.033	0.0548	0.0308	0.0387	0.0622	0.0314	0.0536	0.0302	0.0517	0.0535	0.042	0.0559	0.0313	0.0451	0.0662	0.034	0.0511	0.0281	0.05	0.0682	0.0285	0.0514	0.0251	0.0473
TG O-50:3	TG	Positive	M+NH4	860.807	9.78	TG 15:0/18:1-d7/15:0	0.0216215	0.02055	0.0135	0.02055	0.0156	0.01655	0.0254	0.0129	0.0191	0.0137	0.0147	0.0194	0.0133	0.0205	0.0107	0.015	0.0223	0.0118	0.0173	0.0135	0.0152	0.0184	0.014	0.0213	0.0105	0.0154	0.0202	0.0121	0.0202	0.0116	0.0169	0.0216	0.0124	0.019	0.0109	0.0163
TG O-52:3	TG	Positive	M+NH4	888.838	10.09	TG 15:0/18:1-d7/15:0	0.0469517	0.02805	0.0166	0.0265	0.01715	0.0187	0.0326	0.0197	0.0277	0.0148	0.0159	0.0277	0.0145	0.0268	0.0131	0.0167	0.0279	0.0135	0.0271	0.0121	0.0243	0.0243	0.0189	0.0282	0.0141	0.0186	0.0293	0.0147	0.0259	0.0113	0.0213	0.0317	0.0108	0.0241	0.0115	0.0182
LPI 16:0	LPI	Negative	M-H	571.289	2.5	LPI 17:1	0.50046	0.369	0.379	0.4205	0.208	0.816	0.321	0.333	0.415	0.273	0.744	0.419	0.38	0.358	0.252	0.813	0.528	0.322	0.428	0.292	0.859	0.438	0.299	0.316	0.251	0.881	0.578	0.318	0.413	0.348	0.754	0.577	0.424	0.359	0.274	1.11
LPI 18:0	LPI	Negative	M-H	599.32	2.65	LPI 17:1	0.428647	5.835	5.64	5.245	4.52	7.65	5.51	5.32	4.65	4.71	6.33	6.13	5.14	3.99	4.06	6.97	8.37	5.07	4.78	4.52	7.62	6.11	4.05	3.7	3.41	7.02	7.26	4.68	4.11	4.65	5.74	7.74	5.4	4.22	3.63	8.65
LPI 18:1	LPI	Negative	M-H	597.305	2.53	LPI 17:1	0.272383	0.533	0.548	0.4135	0.4995	0.843	0.497	0.48	0.406	0.783	0.75	0.618	0.607	0.356	0.821	0.762	0.823	0.576	0.405	1	0.86	0.669	0.378	0.336	0.83	0.898	0.871	0.547	0.414	1.17	0.744	0.844	0.704	0.425	1.17	1.16
LPI 18:2	LPI	Negative	M-H	595.289	2.44	LPI 17:1	0.651214	0.101	0.0945	0.0704	0.06005	0.0553	0.0533	0.0508	0.0498	0.141	0.0391	0.0467	0.0647	0.04	0.146	0.0447	0.102	0.0451	0.0754	0.194	0.0621	0.1	0.0764	0.0728	0.216	0.0955	0.172	0.1	0.112	0.327	0.143	0.177	0.147	0.126	0.293	0.145
LPI 20:3	LPI	Negative	M-H	621.305	2.49	LPI 17:1	0.361011	0.2265	0.163	0.3255	0.194	0.4475	0.202	0.156	0.29	0.199	0.389	0.153	0.111	0.26	0.218	0.431	0.233	0.0726	0.382	0.228	0.416	0.245	0.218	0.41	0.212	0.534	0.334	0.278	0.445	0.382	0.631	0.285	0.241	0.53	0.295	0.834
LPI 20:4	LPI	Negative	M-H	619.289	2.43	LPI 17:1	0.494996	2.985	2.66	2.775	3.065	2.395	2.31	2.32	2.09	3.4	2.14	1.2	2.17	2.1	3.16	1.94	2.42	1.33	2.98	3.49	2.46	2.72	2.71	2.85	4.45	3.43	3.28	2.45	2.83	5.65	3.63	2.74	4.03	3.44	5.29	4.14
PI 32:0	PI	Negative	M-H	809.519	4.04	PI 15:0/18:1-d7	0.00584328	0.7395	0.641	0.916	0.5945	0.929	0.669	0.58	0.758	0.567	0.933	0.378	0.473	0.74	0.484	0.803	0.501	0.394	0.841	0.494	0.871	0.481	0.554	0.777	0.485	0.83	0.46	0.449	0.655	0.38	0.799	0.329	0.353	0.624	0.355	0.661
PI 32:1	PI	Negative	M-H	807.503	3.78	PI 15:0/18:1-d7	0.0383698	1.63	1.38	1.34	1.425	1.455	1.27	1.26	1.06	1.08	1.46	0.791	1.03	0.917	0.984	1.28	1.17	0.867	1.29	0.976	1.42	1.02	1.16	1.13	1.1	1.1	0.97	0.884	0.838	0.638	1.04	0.654	0.671	0.939	0.576	0.959
PI 34:0	PI	Negative	M-H	837.55	4.43	PI 15:0/18:1-d7	0.0266174	0.813	0.7045	0.725	0.7735	0.7195	0.737	0.684	0.832	0.631	0.688	0.438	0.544	0.774	0.659	0.636	0.605	0.484	0.863	0.586	0.674	0.58	0.553	0.843	0.581	0.645	0.568	0.482	0.678	0.494	0.662	0.442	0.49	0.722	0.397	0.545
PI 34:1	PI	Negative	M-H	835.534	4.12	PI 15:0/18:1-d7	0.000461502	5.68	4.685	5.31	5.39	4.505	5.14	4.42	4.73	4.95	4.52	3.31	3.55	4.32	4.29	4.16	4.49	3.11	5.03	4.03	4.32	4.31	4.14	4.69	3.99	3.91	3.99	3.05	4.04	3.21	4.17	3.31	3.02	4.05	2.68	3.74
PI 34:2	PI	Negative	M-H	833.519	3.83	PI 15:0/18:1-d7	0.0266325	2.115	1.87	1.995	1.795	2.11	1.97	1.82	1.8	1.61	2.16	1.81	1.65	1.81	1.56	2.1	1.97	1.68	2.09	1.68	2.09	1.97	1.77	1.85	1.85	2.02	2.09	1.67	1.81	1.65	2.19	1.98	1.72	1.72	1.57	2.11
PI 35:2	PI	Negative	M-H	847.534	4.01	PI 15:0/18:1-d7	0.119424	0.113	0.0653	0.04515	0.05805	0.05935	0.1	0.067	0.0414	0.0559	0.0548	0.0805	0.0411	0.0354	0.0454	0.0539	0.111	0.0561	0.0488	0.0461	0.0549	0.0909	0.0568	0.0467	0.0614	0.0508	0.111	0.0501	0.0291	0.0478	0.059	0.0972	0.0499	0.0607	0.0667	0.0427
PI 36:1	PI	Negative	M-H	863.566	4.54	PI 15:0/18:1-d7	0.069514	0.5665	0.3975	0.374	0.4485	0.5345	0.546	0.397	0.36	0.416	0.555	0.564	0.366	0.379	0.402	0.58	0.594	0.413	0.451	0.418	0.594	0.662	0.388	0.371	0.423	0.51	0.623	0.367	0.329	0.41	0.617	0.572	0.404	0.318	0.378	0.581
PI 36:2	PI	Negative	M-H	861.55	4.21	PI 15:0/18:1-d7	0.0454785	4.14	3.14	3.06	3.36	2.72	3.99	3.23	3.01	3.18	2.89	4.03	3.21	2.91	3.07	2.81	4.42	3.11	3.36	3.2	3.11	4.29	3.15	2.88	3.26	2.78	4.46	3.03	3.05	3.24	3.25	4.49	3.55	2.98	2.9	3.03
PI 36:3	PI	Negative	M-H	859.534	3.93	PI 15:0/18:1-d7	0.0172586	3.49	3.235	4.215	3.26	4.695	3.17	2.98	3.93	2.99	4.56	2.61	2.86	3.86	2.81	4.63	3.08	2.68	4.25	2.95	4.82	3.26	3.1	3.95	3.23	4.75	3.32	2.95	3.63	2.98	5.17	3.03	3.15	3.74	2.93	4.58
PI 36:4	PI	Negative	M-H	857.519	3.79	PI 15:0/18:1-d7	0.00368177	13.4	13.25	18.45	11.75	19.1	11.8	12.2	16	10.3	19.2	8.45	11.1	15.4	9.81	18	11.3	10.4	18.2	10.2	18.7	11.2	12.6	17.1	11.2	18.9	12.8	11	14.5	10.3	19.7	10.5	11.5	16.2	9.76	19.2
PI 36:5	PI	Negative	M-H	855.503	3.55	PI 15:0/18:1-d7	0.0461396	0.3185	0.254	0.409	0.2115	0.6025	0.244	0.217	0.316	0.189	0.579	0.0838	0.137	0.303	0.193	0.43	0.157	0.106	0.347	0.179	0.524	0.168	0.239	0.383	0.188	0.513	0.189	0.136	0.213	0.152	0.519	0.131	0.166	0.238	0.143	0.471
PI 37:4	PI	Negative	M-H	871.534	3.97	PI 15:0/18:1-d7	0.0511054	1.425	1.09	1.065	1.255	1.0435	1.46	0.993	0.943	1.16	1.05	0.964	0.98	0.919	1.04	0.972	1.27	0.906	0.969	1.18	1.02	1.27	1.05	0.991	1.21	1.08	1.37	0.961	0.843	1.15	1.09	1.17	1.04	0.882	1.21	1.04
PI 38:3	PI	Negative	M-H	887.566	4.31	PI 15:0/18:1-d7	0.0322871	5.33	4.045	4.9	4.305	4.71	5.13	4.15	4.79	4.1	4.83	4.72	3.68	4.81	3.93	5.14	5.7	3.85	5.42	3.88	5.51	5.56	3.85	4.94	4.34	4.62	6.02	3.88	4.91	3.97	5.51	5.43	4.11	5.08	3.95	5.32
PI 38:4	PI	Negative	M-H	885.55	4.17	PI 15:0/18:1-d7	0.00960457	152	148.5	165	162.5	116.5	142	141	148	152	121	109	131	142	147	113	141	121	171	144	117	141	145	160	163	108	140	130	139	157	123	139	144	147	145	115
PI 38:5	PI	Negative	M-H	883.534	3.87	PI 15:0/18:1-d7	0.0439549	15.3	13.05	14.6	12.9	15.95	12.9	12.4	12.4	11.3	15.9	8.12	10.3	12.6	10.9	13.8	11.5	8.43	14.9	11.3	15	11.4	12.4	13.6	13.2	15.3	12.7	10.7	10.9	12.1	16.2	10.2	11.5	11.5	11.4	15.4
PI 38:6	PI	Negative	M-H	881.519	3.68	PI 15:0/18:1-d7	0.053433	1.19	1.145	1.34	1.016	1.665	1.12	0.986	1.2	0.907	1.71	0.532	0.714	1.03	0.767	1.24	0.823	0.634	1.24	0.729	1.5	0.826	1.07	1.29	0.892	1.51	0.998	0.724	0.881	0.712	1.52	0.662	0.833	1.02	0.652	1.41
PI 40:5	PI	Negative	M-H	911.566	4.14	PI 15:0/18:1-d7	0.0182141	1.27	0.9905	1.35	1.095	1.535	1.22	0.993	1.17	0.977	1.59	0.818	0.937	1.05	0.897	1.5	1.16	0.878	1.27	0.621	1.69	1.1	0.971	1.34	0.982	1.49	1.25	1.01	1.09	0.901	1.74	1.11	0.98	1.16	0.927	1.58
PI 40:6	PI	Negative	M-H	909.55	4.02	PI 15:0/18:1-d7	0.0239747	2.07	1.765	2.005	1.775	1.77	1.81	1.56	1.84	1.59	1.73	1.14	1.43	1.69	1.48	1.55	1.68	1.27	1.94	1.57	1.69	1.68	1.67	1.87	1.84	1.77	1.81	1.45	1.5	1.61	1.78	1.5	1.54	1.67	1.58	1.65
PI O-18:1_20:4	PI	Negative	M-H	869.555	4.12	PI 15:0/18:1-d7	0.255769	0.169	0.131	0.155	0.13045	0.0775	0.11	0.12	0.0496	0.153	0.0403	0.0228	0.0524	0.115	0.0835	0.0317	0.101	0.0396	0.144	0.161	0.149	0.0307	0.14	0.15	0.0916	0.0587	0.0852	0.0833	0.0709	0.1	0.0436	0.0675	0.168	0.101	0.147	0.0752
LPG 18:1	LPG	Negative	M-H	509.288	2.57	LPG 17:1	0.0209244	0.5275	0.395	0.498	0.466	0.622	0.428	0.283	0.407	0.305	0.418	0.365	0.21	0.405	0.2	0.313	0.323	0.182	0.366	0.186	0.285	0.463	0.341	0.501	0.376	0.552	0.454	0.329	0.52	0.372	0.439	0.35	0.311	0.439	0.318	0.426
LPG 18:2	LPG	Negative	M-H	507.273	2.47	LPG 17:1	0.0731942	0.1115	0.09215	0.0983	0.1305	0.07645	0.0713	0.0426	0.0833	0.0834	0.0397	0.0467	0.0442	0.0704	0.0614	0.0228	0.0398	0.025	0.077	0.0543	0.0277	0.105	0.11	0.114	0.141	0.0851	0.0997	0.0984	0.121	0.154	0.08	0.0923	0.119	0.116	0.155	0.0855
PG 32:0	PG	Negative	M-H	721.503	4.07	PG 15:0/18:1-d7	0.110638	0.018	0.031	0.0345	0.01265	0.04265	0.0239	0.0255	0.0338	0.002435	0.0378	0.0173	0.0262	0.0356	0.0116	0.0437	0.0193	0.0198	0.0363	0.00487	0.0443	0.0137	0.0287	0.0357	0.0166	0.0303	0.002435	0.0158	0.0344	0.0136	0.041	0.0194	0.002435	0.0371	0.0127	0.0413
PG 32:1	PG	Negative	M-H	719.487	3.87	PG 15:0/18:1-d7	0.0313306	0.0265	0.03065	0.0513	0.0194	0.08445	0.0213	0.0282	0.0455	0.0211	0.0879	0.0225	0.0317	0.0582	0.0167	0.0901	0.0195	0.0313	0.0552	0.0178	0.0866	0.0167	0.031	0.0475	0.0238	0.0894	0.0187	0.0342	0.0492	0.0158	0.0837	0.0214	0.0315	0.0486	0.0145	0.0791
PG 34:2	PG	Negative	M-H	745.503	3.95	PG 15:0/18:1-d7	0.0323599	0.3185	0.3845	0.442	0.3125	0.375	0.309	0.358	0.379	0.326	0.318	0.227	0.345	0.434	0.288	0.338	0.255	0.319	0.436	0.295	0.35	0.283	0.404	0.421	0.345	0.35	0.311	0.353	0.384	0.303	0.398	0.291	0.338	0.402	0.288	0.341
PG 36:1	PG	Negative	M-H	775.549	5.02	PG 15:0/18:1-d7	0.0467496	0.718	0.3845	0.4365	0.632	0.353	0.588	0.369	0.356	0.631	0.328	0.261	0.221	0.36	0.45	0.225	0.375	0.198	0.413	0.495	0.28	0.381	0.391	0.431	0.636	0.289	0.472	0.225	0.274	0.453	0.312	0.35	0.251	0.314	0.498	0.254
PG 36:2	PG	Negative	M-H	773.534	4.6	PG 15:0/18:1-d7	0.0601156	1.475	0.9935	1.285	1.295	1.575	1.37	0.913	1.22	1.37	1.55	1.31	0.935	1.28	1.32	1.55	1.35	0.858	1.37	1.28	1.63	1.44	0.991	1.34	1.39	1.65	1.5	0.909	1.22	1.26	1.68	1.5	0.984	1.29	1.23	1.52
PG 36:3	PG	Negative	M-H	771.518	4.23	PG 15:0/18:1-d7	0.0123586	0.8455	0.6035	0.6655	0.96	0.6205	0.784	0.568	0.599	0.924	0.621	0.659	0.521	0.634	0.851	0.555	0.748	0.51	0.676	0.909	0.608	0.761	0.593	0.651	0.962	0.578	0.762	0.526	0.595	0.778	0.612	0.715	0.533	0.641	0.836	0.59
PG 38:4	PG	Negative	M-H	797.534	4.23	PG 15:0/18:1-d7	0.0455808	0.0582	0.0618	0.05705	0.06635	0.04215	0.0656	0.0772	0.0718	0.0816	0.055	0.0365	0.0331	0.0724	0.0692	0.037	0.0424	0.0492	0.0702	0.0597	0.0343	0.0672	0.0795	0.0776	0.101	0.0374	0.0944	0.0709	0.066	0.0568	0.0726	0.0327	0.0676	0.0774	0.0766	0.0544
PG 38:5	PG	Negative	M-H	795.518	3.76	PG 15:0/18:1-d7	0.0213213	0.6555	0.4335	0.492	0.6315	0.45	0.552	0.408	0.423	0.595	0.397	0.301	0.297	0.432	0.561	0.336	0.386	0.231	0.486	0.513	0.396	0.413	0.464	0.516	0.608	0.405	0.431	0.301	0.327	0.495	0.439	0.381	0.366	0.429	0.527	0.383
PG 38:6	PG	Negative	M-H	793.503	3.5	PG 15:0/18:1-d7	0.0373931	0.2305	0.172	0.178	0.26	0.1455	0.202	0.153	0.156	0.294	0.15	0.0891	0.108	0.17	0.239	0.117	0.139	0.0865	0.179	0.244	0.122	0.138	0.176	0.18	0.276	0.139	0.151	0.12	0.118	0.227	0.142	0.119	0.121	0.15	0.237	0.119
PG 40:6	PG	Negative	M-H	821.534	3.95	PG 15:0/18:1-d7	0.0350858	0.82	0.5155	0.6165	0.7045	0.67	0.66	0.457	0.574	0.745	0.606	0.437	0.509	0.679	0.882	0.562	0.532	0.317	0.738	0.768	0.617	0.55	0.532	0.611	0.862	0.597	0.566	0.43	0.479	0.857	0.667	0.58	0.544	0.545	0.73	0.68
PG 40:7	PG	Negative	M-H	819.518	3.65	PG 15:0/18:1-d7	0.0150095	1.565	1.21	1.88	1.79	1.16	1.36	1.04	1.6	1.85	1.08	0.569	0.686	1.58	1.62	0.802	0.906	0.555	1.75	1.41	0.927	0.94	1.17	1.91	1.81	1.02	1.03	0.745	1.09	1.36	0.979	0.724	0.8	1.44	1.41	0.865
PG 40:8	PG	Negative	M-H	817.503	3.46	PG 15:0/18:1-d7	0.00582667	0.4795	0.3875	0.5125	0.672	0.225	0.38	0.361	0.424	0.696	0.213	0.148	0.253	0.546	0.625	0.166	0.252	0.149	0.488	0.542	0.205	0.257	0.394	0.519	0.71	0.187	0.294	0.252	0.292	0.686	0.211	0.201	0.287	0.36	0.603	0.171
LPC O-16:0	LPC-O	Negative	M+HCO2	526.351	2.69	LPC O-16:0-d4	0.0360169	0.1445	0.159	0.1385	0.151	0.131	0.143	0.123	0.166	0.163	0.142	0.144	0.131	0.14	0.16	0.143	0.143	0.125	0.142	0.166	0.159	0.141	0.115	0.122	0.161	0.138	0.139	0.126	0.121	0.167	0.141	0.133	0.122	0.122	0.16	0.134
LPC O-18:0	LPC-O	Negative	M+HCO2	554.383	2.89	LPC O-16:0-d4	0.0610396	0.06615	0.07495	0.0685	0.07575	0.06915	0.0618	0.0783	0.0643	0.0794	0.0488	0.0736	0.0942	0.0674	0.066	0.0564	0.0596	0.0695	0.0696	0.0599	0.0697	0.0787	0.0398	0.0595	0.0606	0.0716	0.0929	0.0657	0.0709	0.0815	0.0704	0.0544	0.0639	0.0401	0.0733	0.0707
LPC O-18:1	LPC-O	Negative	M+HCO2	552.367	2.76	LPC O-16:0-d4	0.121187	0.1275	0.1205	0.10245	0.144	0.1295	0.123	0.12	0.0976	0.133	0.113	0.119	0.124	0.0918	0.132	0.131	0.102	0.107	0.12	0.127	0.143	0.13	0.119	0.111	0.154	0.128	0.155	0.123	0.121	0.128	0.147	0.156	0.123	0.109	0.154	0.127
PC O-16:0_16:0	PC-O	Positive	M+H	720.59	4.94	PC O-18:0/18:1-d9	0.0222939	0.406	0.4205	0.448	0.4445	0.4185	0.403	0.401	0.443	0.407	0.399	0.465	0.436	0.519	0.426	0.435	0.378	0.442	0.432	0.439	0.452	0.441	0.351	0.415	0.439	0.397	0.424	0.472	0.464	0.451	0.442	0.428	0.465	0.454	0.454	0.433
PC O-16:0_18:2	PC-O	Positive	M+H	744.59	5.02	PC O-18:0/18:1-d9	0.096142	0.00879	0.00533	0.006475	0.00964	0.00734	0.0115	0.00445	0.00604	0.00746	0.00459	0.0087	0.00462	0.0112	0.00925	0.00778	0.00862	0.00561	0.00565	0.00896	0.0065	0.00701	0.00717	0.00666	0.0105	0.00513	0.00638	0.00569	0.00393	0.0106	0.00317	0.00699	0.00287	0.00613	0.00826	0.00455
PC O-16:0_20:4	PC-O	Positive	M+H	768.59	4.59	PC O-18:0/18:1-d9	0.0953151	0.4155	0.4475	0.4255	0.4905	0.3995	0.389	0.409	0.378	0.414	0.368	0.327	0.408	0.456	0.461	0.355	0.338	0.366	0.371	0.458	0.388	0.334	0.437	0.376	0.399	0.398	0.339	0.428	0.412	0.443	0.393	0.307	0.396	0.367	0.492	0.356
PC O-16:1_16:0	PC-O	Positive	M+H	718.575	4.89	PC O-18:0/18:1-d9	0.00384769	0.08985	0.06215	0.0738	0.0882	0.06235	0.0901	0.0678	0.0653	0.0711	0.0572	0.0825	0.0469	0.0763	0.0689	0.0483	0.0723	0.0632	0.0586	0.0754	0.0542	0.0864	0.0555	0.0742	0.0818	0.0641	0.0934	0.0567	0.0661	0.0797	0.0605	0.0831	0.0602	0.066	0.0763	0.0487
PC O-16:1_18:1	PC-O	Positive	M+H	744.59	4.66	PC O-18:0/18:1-d9	0.0107056	0.07605	0.06495	0.07985	0.0729	0.07475	0.0797	0.0666	0.0687	0.0687	0.0747	0.0845	0.0761	0.0859	0.0633	0.0764	0.0664	0.0814	0.0748	0.0808	0.0791	0.0747	0.0729	0.0761	0.0595	0.0675	0.063	0.0795	0.0849	0.0788	0.0859	0.0835	0.0719	0.085	0.0792	0.0626
PC O-16:1_20:4	PC-O	Positive	M+H	766.575	4.53	PC O-18:0/18:1-d9	0.127465	0.191	0.175	0.171	0.2345	0.11055	0.199	0.178	0.132	0.231	0.11	0.113	0.127	0.152	0.189	0.0878	0.163	0.112	0.124	0.223	0.0619	0.166	0.13	0.124	0.199	0.112	0.159	0.142	0.0916	0.188	0.105	0.136	0.145	0.106	0.246	0.0822
PC O-18:0_20:4	PC-O	Positive	M+H	796.621	5.1	PC O-18:0/18:1-d9	0.0210182	0.1355	0.1485	0.1495	0.174	0.1375	0.145	0.142	0.129	0.15	0.104	0.122	0.146	0.168	0.155	0.122	0.128	0.144	0.144	0.164	0.135	0.147	0.142	0.136	0.157	0.121	0.134	0.144	0.136	0.147	0.121	0.127	0.14	0.125	0.165	0.127
PC O-18:1_18:1	PC-O	Positive	M+H	772.621	5.16	PC O-18:0/18:1-d9	0.0218668	0.115	0.10505	0.1295	0.1155	0.116	0.118	0.104	0.114	0.105	0.104	0.135	0.117	0.14	0.107	0.128	0.125	0.117	0.138	0.12	0.12	0.125	0.0927	0.124	0.116	0.105	0.114	0.118	0.128	0.113	0.114	0.13	0.127	0.117	0.121	0.118
PC O-18:1_18:2	PC-O	Positive	M+H	770.606	4.75	PC O-18:0/18:1-d9	0.0664111	0.04875	0.04615	0.0586	0.047	0.06135	0.0398	0.0565	0.0441	0.0408	0.0509	0.0565	0.0524	0.0598	0.045	0.0599	0.0288	0.055	0.0593	0.058	0.0556	0.0493	0.044	0.0382	0.0458	0.0649	0.0412	0.0387	0.0478	0.0484	0.0489	0.0493	0.052	0.0585	0.051	0.0512
PC O-18:1_20:4	PC-O	Positive	M+H	794.606	4.65	PC O-18:0/18:1-d9	0.0719615	0.8475	0.815	0.8295	0.85	0.7315	0.83	0.78	0.717	0.731	0.688	0.641	0.816	0.842	0.733	0.733	0.602	0.669	0.776	0.828	0.699	0.672	0.769	0.7	0.723	0.681	0.655	0.875	0.673	0.852	0.776	0.592	0.716	0.672	0.914	0.669
PC O-36:0	PC-O	Positive	M+H	776.653	4.9	PC O-18:0/18:1-d9	0.126391	0.009135	0.005345	0.008415	0.007295	0.005795	0.00844	0.00505	0.00886	0.00469	0.00515	0.00942	0.00325	0.00738	0.0091	0.00702	0.0093	0.00456	0.00795	0.00672	0.00588	0.0102	0.00404	0.00731	0.00716	0.0059	0.0108	0.00474	0.00892	0.00691	0.00962	0.0116	0.00688	0.00669	0.00666	0.00637
PC O-40:11	PC-O	Positive	M+H	810.543	4.15	PC O-18:0/18:1-d9	0.14952	0.306	0.243	0.2495	0.2645	0.265	0.327	0.209	0.234	0.238	0.234	0.322	0.216	0.27	0.238	0.249	0.261	0.194	0.188	0.257	0.262	0.339	0.222	0.246	0.217	0.257	0.284	0.225	0.234	0.257	0.239	0.275	0.182	0.214	0.307	0.204
PC O-40:4	PC-O	Positive	M+H	824.653	5.36	PC O-18:0/18:1-d9	0.0012184	0.05025	0.03415	0.04535	0.049	0.0275	0.0483	0.0307	0.0383	0.0409	0.0283	0.0362	0.033	0.0488	0.0506	0.0264	0.0508	0.0307	0.0436	0.0446	0.0279	0.0476	0.0266	0.0406	0.0458	0.0245	0.05	0.0373	0.038	0.0419	0.0347	0.0389	0.0288	0.0455	0.044	0.0299
PC O-40:6	PC-O	Positive	M+H	820.621	4.65	PC O-18:0/18:1-d9	0.139524	0.01355	0.013655	0.02015	0.0153	0.01315	0.00605	0.00962	0.0155	0.0145	0.00997	0.00649	0.0118	0.0208	0.0115	0.00202	0.00691	0.00528	0.013	0.00889	0.00202	0.00202	0.011	0.0134	0.00735	0.00874	0.00653	0.00202	0.0105	0.00993	0.012	0.00404	0.0103	0.0093	0.0134	0.00916
HexCer 18:1;O2/18:0	HexCer	Positive	M+H	728.603	4.94	LacCer d18:1/17:0	0.0554404	0.485	0.243	0.4355	0.4685	0.236	0.55	0.211	0.396	0.473	0.224	0.426	0.248	0.439	0.316	0.227	0.521	0.234	0.388	0.39	0.256	0.464	0.253	0.278	0.2	0.25	0.532	0.206	0.339	0.0401	0.208	0.336	0.165	0.407	0.0367	0.204
HexCer 18:1;O2/20:0	HexCer	Positive	M+H	756.635	5.52	LacCer d18:1/17:0	0.141266	0.2265	0.1875	0.275	0.326	0.215	0.216	0.144	0.217	0.317	0.173	0.204	0.225	0.213	0.203	0.211	0.318	0.188	0.237	0.255	0.192	0.245	0.181	0.194	0.117	0.00632	0.277	0.149	0.195	0.0434	0.184	0.226	0.0839	0.214	0.0134	0.17
HexCer 18:1;O2/24:0;O	HexCer	Positive	M+H	828.692	6.6	LacCer d18:1/17:0	0.0401572	0.1755	0.0609	0.246	0.12705	0.104	0.142	0.018	0.285	0.018	0.0699	0.104	0.0825	0.235	0.036	0.092	0.144	0.0501	0.265	0.0722	0.018	0.185	0.0586	0.189	0.158	0.0665	0.123	0.018	0.263	0.0629	0.101	0.132	0.018	0.307	0.0991	0.097
LPS 18:0	LPS	Negative	M-H	524.299	2.62	LPI 17:1	1.00456	1.765	1.85	2.38	1.65	1.6	1.99	2.14	2.51	2.01	1.45	2.65	2.47	2.21	1.86	1.94	3.88	2.5	2.93	2.2	2.56	2.69	1.94	2.51	1.91	1.88	3.98	3.31	3.38	2.97	1.64	3.65	3.6	3.85	2.73	3.18
LPS 18:1	LPS	Negative	M-H	522.284	2.45	LPI 17:1	1.54175	0.1167	0.11365	0.15715	0.12245	0.1625	0.116	0.0994	0.177	0.157	0.154	0.219	0.176	0.172	0.197	0.154	0.283	0.12	0.253	0.281	0.181	0.264	0.165	0.191	0.256	0.199	0.419	0.239	0.367	0.442	0.242	0.363	0.341	0.375	0.439	0.348
LPS 20:4	LPS	Negative	M-H	544.268	2.37	LPI 17:1	0.805306	1.268	1.468	1.619	1.42	1.315	1.08	1.23	1.29	2.21	1.09	0.567	1.09	1.2	2.27	1.05	1.16	0.737	1.84	2.85	1.44	1.46	1.9	2.23	3.19	2.03	2.09	1.99	2.2	4.29	2.4	1.55	3.23	2.76	4.83	2.53
PS 34:1	PS	Negative	M-H	760.513	4.17	PS 15:0/18:1-d7	0.0593227	0.896	0.6255	0.996	0.923	0.6975	1.31	0.636	1.05	0.857	0.582	1.02	0.543	1.15	0.797	0.723	0.984	0.542	0.848	0.946	0.787	1.12	0.725	0.722	0.693	0.624	1.13	0.456	0.972	0.565	0.629	0.755	0.511	1.03	0.728	0.627
PS 36:1	PS	Negative	M-H	788.545	4.59	PS 15:0/18:1-d7	0.0241233	6.705	5.24	7.045	9.885	5.775	9.25	5.84	7.15	7.43	5.74	6.37	5.4	8.22	6.33	5.75	6.66	6.14	7.49	7.63	5.31	7.65	6.16	5.64	7.73	5.51	6.99	4.94	5.84	8.46	5.38	5.34	4.97	6.31	7.12	5.15
PS 36:2	PS	Negative	M-H	786.529	4.27	PS 15:0/18:1-d7	0.00410837	4.565	3.565	4.85	4.875	4.395	6.15	3.97	5.04	4.07	4.28	4.22	3.76	5.29	3.74	4.09	4.43	3.87	4.93	4.25	4.3	4.82	4.02	3.84	4.06	3.92	4.76	3.63	4.58	4.47	3.7	3.12	3.18	4.69	4	3.76
PS 36:4	PS	Negative	M-H	782.498	3.84	PS 15:0/18:1-d7	0.0134254	11.9	10.25	11.1	11.45	12.55	15.8	9.94	10.2	9.6	11.1	8.05	9.57	12.4	8.45	9.93	9.86	8.58	11.1	9.45	11.1	9.65	11.3	8.46	10.1	10.4	9.78	8.69	8.27	9.72	9.9	6.4	7.78	9.28	9.13	8.73
PS 38:1	PS	Negative	M-H	816.576	5.02	PS 15:0/18:1-d7	0.0266113	0.2625	0.16	0.2965	0.282	0.259	0.294	0.0515	0.0515	0.207	0.175	0.132	0.0515	0.277	0.198	0.156	0.134	0.0515	0.283	0.0515	0.147	0.161	0.159	0.184	0.405	0.187	0.172	0.103	0.106	0.273	0.202	0.179	0.113	0.295	0.168	0.147
PS 38:2	PS	Negative	M-H	814.56	4.71	PS 15:0/18:1-d7	0.198603	0.408	0.34	0.5355	0.561	0.4385	0.492	0.353	0.48	0.404	0.464	0.439	0.359	0.666	0.504	0.333	0.502	0.314	0.619	0.449	0.41	0.335	0.343	0.572	0.559	0.372	0.454	0.348	0.508	0.614	0.36	0.335	0.245	0.425	0.447	0.336
PS 38:3	PS	Negative	M-H	812.545	4.39	PS 15:0/18:1-d7	0.130022	3.93	3.345	5.165	4.69	5.205	4.63	3.48	5.42	3.69	5.25	3.6	3.11	5.83	3.5	4.18	3.34	3.58	5.7	3.7	4.45	3.54	3.53	3.95	4.39	4.01	4.27	3.18	4.76	4.46	4.17	2.72	3.24	4.52	3.49	4.19
PS 38:4	PS	Negative	M-H	810.529	4.22	PS 15:0/18:1-d7	0.017494	112	96.8	129	119	97.25	144	105	113	104	86.4	79	89.5	134	88.8	79.7	98.6	89.5	124	94.6	84.6	101	109	103	106	78.2	104	90.6	96.5	102	74.6	63	79.2	107	91.5	73.9
PS 40:2	PS	Negative	M-H	842.592	5.1	PS 15:0/18:1-d7	0.0666031	0.3355	0.23	0.4525	0.3875	0.2365	0.439	0.211	0.416	0.307	0.258	0.193	0.084	0.487	0.215	0.27	0.224	0.194	0.323	0.284	0.22	0.318	0.264	0.414	0.39	0.168	0.296	0.202	0.212	0.239	0.256	0.168	0.178	0.31	0.084	0.192
PS 40:4	PS	Negative	M-H	838.56	4.5	PS 15:0/18:1-d7	0.0778965	5.83	4.42	5.29	7.165	4.51	7.25	4.85	5.04	5.83	4.38	3.66	4.14	5.95	5.06	3.61	4.97	3.59	6.04	5.24	3.93	4.89	5.16	4.44	6	4.08	5.38	4.04	3.82	6.33	3.85	3.5	3.93	4.26	5.31	3.24
PS 40:5	PS	Negative	M-H	836.545	4.36	PS 15:0/18:1-d7	0.00209107	6.64	5.06	6.75	6.935	5.935	8.13	4.36	5.91	5.8	5.32	3.86	4.23	6.26	4.77	4.52	4.81	3.63	7.53	5.1	4.3	4.21	5.42	5.8	5.24	5.35	5.44	3.84	5.23	4.82	3.76	2.89	3.21	5.32	4.64	4.17
PS 40:6	PS	Negative	M-H	834.529	4.06	PS 15:0/18:1-d7	0.0235205	45.25	32.3	44.55	48.6	34.4	56.8	33	39.9	42.1	31.2	27.2	27.4	44.1	33.8	26.1	35.8	25.7	43.7	36.3	28	34.8	35.7	35.6	37.5	25.8	33.6	25.4	31.5	33.2	23.5	21.5	22.2	32.7	26.6	22.4
PS 40:7	PS	Negative	M-H	832.513	3.77	PS 15:0/18:1-d7	0.0317433	2.385	1.53	2.07	1.89	2.485	2.61	1.31	1.75	1.5	2.22	0.948	1.19	2.31	1.38	1.81	1.33	0.876	2.25	1.37	1.8	1.38	1.45	1.65	1.54	1.83	1.22	0.861	1.35	1.38	1.48	0.666	0.762	1.37	0.86	1.14
LPE O-16:1	LPE-O	Negative	M-H	436.283	2.73	LPE 18:1-d7	1.08622	0.2015	0.19	0.201	0.177	0.156	0.162	0.142	0.206	0.19	0.115	0.218	0.166	0.145	0.157	0.134	0.308	0.14	0.262	0.16	0.156	0.211	0.142	0.174	0.18	0.167	0.434	0.141	0.219	0.238	0.15	0.385	0.249	0.23	0.156	0.241
LPE O-18:1	LPE-O	Negative	M-H	464.315	2.95	LPE 18:1-d7	1.04261	0.14535	0.13165	0.1376	0.144	0.10225	0.122	0.0961	0.135	0.118	0.0781	0.151	0.105	0.101	0.119	0.0839	0.215	0.0943	0.155	0.141	0.106	0.138	0.103	0.121	0.161	0.11	0.284	0.103	0.136	0.208	0.0993	0.245	0.158	0.14	0.147	0.154
LPE O-18:2	LPE-O	Negative	M-H	462.299	2.76	LPE 18:1-d7	1.22678	0.0905	0.07595	0.0876	0.0608	0.0612	0.0735	0.0437	0.0937	0.0592	0.0511	0.0955	0.0698	0.0713	0.0655	0.0505	0.133	0.0587	0.112	0.0498	0.0652	0.0919	0.0574	0.0701	0.0596	0.0571	0.189	0.0535	0.0894	0.0943	0.0704	0.164	0.0914	0.11	0.0708	0.0871
LPE O-20:1	LPE-O	Negative	M-H	492.346	3.21	LPE 18:1-d7	0.404483	0.04045	0.022	0.02855	0.0399	0.0279	0.0323	0.0163	0.0291	0.0378	0.0172	0.0325	0.00815	0.0238	0.0354	0.00815	0.0437	0.0203	0.0332	0.0287	0.0219	0.0375	0.0224	0.0313	0.0385	0.0197	0.058	0.00815	0.0288	0.0395	0.00815	0.052	0.0273	0.0253	0.032	0.0258
PE O-16:1_16:0	PE-O	Negative	M-H	674.513	5.15	PE 15:0/18:1-d7	0.0724795	0.0277	0.0174	0.02505	0.0198	0.01795	0.0362	0.0053	0.0156	0.0221	0.0137	0.0127	0.0053	0.0216	0.0147	0.0106	0.0164	0.0053	0.0307	0.0053	0.0143	0.0171	0.0174	0.0259	0.0218	0.0173	0.0239	0.0053	0.0053	0.0174	0.0137	0.0299	0.012	0.017	0.0178	0.0195
PE O-16:1_18:1	PE-O	Negative	M-H	700.529	5.26	PE 15:0/18:1-d7	0.0271667	0.491	0.3245	0.4715	0.453	0.379	0.407	0.29	0.387	0.436	0.314	0.337	0.248	0.469	0.379	0.283	0.394	0.246	0.419	0.402	0.311	0.388	0.324	0.417	0.499	0.35	0.398	0.259	0.377	0.371	0.335	0.353	0.292	0.381	0.393	0.326
PE O-16:1_18:2	PE-O	Negative	M-H	698.513	4.8	PE 15:0/18:1-d7	0.00403017	0.08	0.0802	0.1083	0.08475	0.0965	0.0764	0.0645	0.0753	0.0847	0.0837	0.0594	0.053	0.094	0.072	0.0716	0.0692	0.0427	0.0917	0.0671	0.0735	0.0599	0.0637	0.0889	0.0867	0.0858	0.0728	0.0553	0.0774	0.0611	0.0864	0.0632	0.0548	0.0812	0.0801	0.0755
PE O-16:1_20:4	PE-O	Negative	M-H	722.513	4.71	PE 15:0/18:1-d7	0.00376303	3.38	3.13	3.265	3.36	2.82	2.87	2.85	2.65	3.53	2.6	2.01	2.23	2.47	2.57	2.24	2.47	2.1	2.79	3.17	2.26	2.58	2.87	2.88	3.39	2.63	2.93	2.17	2.19	2.91	2.31	2.34	2.32	2.61	3.2	2.45
PE O-16:1_22:6	PE-O	Negative	M-H	746.513	4.54	PE 15:0/18:1-d7	0.0387916	1.555	1.11	1.33	1.5	1.045	1.38	0.966	0.96	1.51	0.914	0.825	0.691	1.05	1.14	0.726	0.972	0.717	1.07	1.27	0.796	1.04	1.13	1.1	1.5	0.897	1.24	0.792	0.826	1.23	0.859	0.801	0.831	0.964	1.31	0.819
PE O-18:1_18:1	PE-O	Negative	M-H	728.56	5.77	PE 15:0/18:1-d7	0.0106496	0.218	0.155	0.256	0.21	0.172	0.178	0.142	0.189	0.205	0.158	0.151	0.125	0.24	0.157	0.15	0.147	0.114	0.234	0.179	0.153	0.204	0.148	0.215	0.235	0.16	0.183	0.112	0.193	0.178	0.18	0.158	0.124	0.203	0.191	0.143
PE O-18:1_18:2	PE-O	Negative	M-H	726.544	5.32	PE 15:0/18:1-d7	0.000301965	0.3425	0.234	0.3835	0.295	0.254	0.306	0.198	0.303	0.299	0.241	0.226	0.165	0.331	0.254	0.199	0.229	0.159	0.311	0.254	0.225	0.236	0.221	0.319	0.334	0.239	0.28	0.162	0.282	0.26	0.225	0.245	0.188	0.304	0.262	0.239
PE O-18:1_20:4	PE-O	Negative	M-H	750.544	5.24	PE 15:0/18:1-d7	0.00161766	4.07	3.055	3.54	3.945	3.245	3.34	2.78	2.95	3.88	2.69	2.26	2.33	3.3	3.08	2.48	2.77	2.06	3.17	3.56	2.42	3.03	3.09	3.23	4.5	2.89	3.31	2.38	2.41	3.31	2.57	2.5	2.65	2.74	3.54	2.54
PE O-18:1_22:6	PE-O	Negative	M-H	774.544	5.06	PE 15:0/18:1-d7	0.0126466	1.405	0.83	1.011	1.215	0.7345	1.19	0.741	0.759	1.24	0.639	0.737	0.544	0.791	0.925	0.547	0.822	0.493	0.866	1.08	0.605	0.919	0.766	0.878	1.33	0.643	1.03	0.576	0.633	1.01	0.644	0.815	0.632	0.691	1.14	0.619
PE O-18:2_18:2	PE-O	Negative	M-H	724.529	4.89	PE 15:0/18:1-d7	0.0320769	0.2515	0.2175	0.3075	0.308	0.251	0.218	0.198	0.281	0.313	0.223	0.108	0.134	0.054	0.29	0.207	0.135	0.122	0.27	0.313	0.155	0.194	0.218	0.054	0.342	0.226	0.163	0.159	0.203	0.254	0.054	0.112	0.131	0.242	0.336	0.167
PE O-18:2_20:4	PE-O	Negative	M-H	748.529	4.81	PE 15:0/18:1-d7	0.0163663	2.08	1.725	2	2.075	1.73	1.85	1.54	1.64	1.97	1.51	1.12	1.18	1.65	1.62	1.26	1.46	1.06	1.79	1.76	1.39	1.45	1.61	1.82	2.2	1.57	1.68	1.19	1.37	1.65	1.53	1.31	1.28	1.58	1.85	1.48
PE O-38:3	PE-O	Negative	M-H	754.576	5.9	PE 15:0/18:1-d7	0.0222743	0.056	0.0466	0.09455	0.06505	0.0605	0.0511	0.0287	0.0631	0.0473	0.0414	0.0367	0.0404	0.082	0.049	0.0303	0.027	0.0135	0.088	0.0583	0.0312	0.0459	0.0433	0.0702	0.0554	0.0437	0.0522	0.0135	0.0604	0.0316	0.0285	0.0379	0.0135	0.066	0.0411	0.0383
PE O-38:4	PE-O	Negative	M-H	752.56	5.45	PE 15:0/18:1-d7	0.0470155	0.333	0.302	0.4305	0.483	0.287	0.285	0.252	0.344	0.438	0.241	0.215	0.228	0.296	0.37	0.23	0.246	0.112	0.33	0.374	0.285	0.235	0.325	0.315	0.49	0.267	0.266	0.222	0.256	0.377	0.288	0.233	0.226	0.311	0.389	0.322
PE O-40:5	PE-O	Negative	M-H	778.576	5.79	PE 15:0/18:1-d7	0.125078	0.9365	0.69	0.818	0.6915	0.721	0.896	0.589	0.61	0.898	0.578	0.328	0.521	0.439	0.39	0.336	0.687	0.274	0.382	0.867	0.406	0.714	0.388	0.713	0.525	0.344	0.481	0.506	0.347	0.729	0.606	0.686	0.555	0.604	0.737	0.391
PE O-40:6	PE-O	Negative	M-H	776.56	5.24	PE 15:0/18:1-d7	0.00813322	0.829	0.6595	0.8255	0.7835	0.637	0.689	0.546	0.609	0.736	0.532	0.44	0.464	0.713	0.651	0.486	0.581	0.428	0.734	0.709	0.568	0.57	0.602	0.727	0.906	0.577	0.626	0.503	0.545	0.686	0.571	0.493	0.537	0.584	0.702	0.555
PE O-40:8	PE-O	Negative	M-H	772.529	4.58	PE 15:0/18:1-d7	0.0158866	0.664	0.4545	0.594	0.6535	0.4245	0.563	0.405	0.452	0.602	0.35	0.275	0.27	0.461	0.486	0.325	0.407	0.232	0.441	0.512	0.323	0.42	0.454	0.502	0.674	0.357	0.469	0.293	0.346	0.486	0.36	0.32	0.331	0.381	0.558	0.299
PE O-42:6	PE-O	Negative	M-H	804.591	5.76	PE 15:0/18:1-d7	0.230309	0.02455	0.02605	0.0358	0.009545	0.0115	0.0424	0.00985	0.0222	0.0397	0.00547	0.002715	0.00626	0.0383	0.0368	0.0168	0.0243	0.002715	0.0314	0.0461	0.00903	0.0257	0.0106	0.0338	0.0241	0.0136	0.0332	0.0121	0.00543	0.0213	0.00942	0.0216	0.002715	0.031	0.0251	0.002715

## Sheet: Kidney Data
Analyte	Class	Polarity	Adduct	Expected Mass (m/z)	Retention Time [min]	Internal Standard	QC RSD	kidney_ct_1	kidney_ct_2	kidney_ct_3	kidney_ct_4	kidney_ct_5	kidney_Ice_035_1	kidney_Ice_035_2	kidney_Ice_035_3	kidney_Ice_035_4	kidney_Ice_035_5	kidney_Ice_090_1	kidney_Ice_090_2	kidney_Ice_090_3	kidney_Ice_090_4	kidney_Ice_090_5	kidney_Ice_120_1	kidney_Ice_120_2	kidney_Ice_120_3	kidney_Ice_120_4	kidney_Ice_120_5	kidney_RT_035_1	kidney_RT_035_2	kidney_RT_035_3	kidney_RT_035_4	kidney_RT_035_5	kidney_RT_090_1	kidney_RT_090_2	kidney_RT_090_3	kidney_RT_090_4	kidney_RT_090_5	kidney_RT_120_1	kidney_RT_120_2	kidney_RT_120_3	kidney_RT_120_4	kidney_RT_120_5
Cer 18:0;O2/16:0	Cer	Positive	M+H	540.535	5.13	Cer d18:1/16:0-d7	0.173549	0.263	0.201	0.172	0.31	0.204	0.285	0.296	0.243	0.323	0.268	0.322	0.27	0.224	0.4	0.363	0.243	0.193	0.169	0.31	0.242	1.19	1.13	1.21	1.01	1.05	1.86	1.51	1.51	1.39	1.64	1.56	1.32	1.2	1.11	1.43
Cer 18:0;O2/22:0	Cer	Positive	M+H	624.629	6.87	Cer d18:1/16:0-d7	0.175915	0.076	0.0662	0.0715	0.108	0.0667	0.0695	0.0789	0.063	0.0828	0.0926	0.0628	0.0657	0.0514	0.108	0.092	0.0657	0.0603	0.0462	0.0769	0.062	0.0832	0.103	0.117	0.143	0.102	0.134	0.12	0.0988	0.137	0.119	0.102	0.0949	0.0926	0.0996	0.12
Cer 18:1;O2/16:0	Cer	Positive	M+H	538.519	4.92	Cer d18:1/16:0-d7	0.0422768	4.42	4.12	3.93	5.09	4	5.57	5.44	4.37	5.68	5.82	5.22	5.14	4.29	6.48	5.9	4.03	3.65	3.89	4.94	4.77	18.6	18.1	16.4	15.7	16.7	24.1	24.3	20.7	21.1	24.6	20.9	20.6	17.8	18.8	22.1
Cer 18:1;O2/18:0	Cer	Positive	M+H	566.551	5.48	Cer d18:1/16:0-d7	0.144544	0.198	0.159	0.152	0.281	0.185	0.229	0.246	0.184	0.276	0.239	0.22	0.242	0.189	0.349	0.291	0.181	0.153	0.131	0.259	0.193	0.668	0.692	0.651	0.79	0.737	1.05	0.925	0.745	0.946	0.911	0.842	0.765	0.618	0.787	0.914
Cer 18:1;O2/20:0	Cer	Positive	M+H	594.582	6.16	Cer d18:1/16:0-d7	0.127841	0.227	0.191	0.196	0.278	0.22	0.253	0.259	0.224	0.3	0.295	0.228	0.249	0.222	0.324	0.346	0.183	0.157	0.17	0.259	0.232	0.461	0.56	0.561	0.596	0.624	0.752	0.664	0.603	0.658	0.72	0.563	0.586	0.502	0.548	0.664
Cer 18:1;O2/22:0	Cer	Positive	M+H	622.613	6.67	Cer d18:1/16:0-d7	0.0974985	0.892	0.814	0.867	1.12	0.871	0.934	0.988	0.89	0.949	1.04	0.82	0.912	0.865	1.21	1.21	0.653	0.531	0.66	0.862	0.757	1.38	1.53	1.57	1.72	1.78	1.83	1.88	1.57	1.67	1.84	1.45	1.43	1.33	1.35	1.58
Cer 18:1;O2/23:0	Cer	Positive	M+H	636.629	6.98	Cer d18:1/16:0-d7	0.103207	0.37	0.288	0.344	0.44	0.335	0.384	0.344	0.329	0.382	0.374	0.343	0.364	0.327	0.476	0.448	0.284	0.204	0.285	0.354	0.294	0.452	0.529	0.562	0.586	0.577	0.573	0.555	0.515	0.551	0.56	0.46	0.421	0.436	0.425	0.505
Cer 18:1;O2/24:0	Cer	Positive	M+H	650.645	7.27	Cer d18:1/16:0-d7	0.130358	2.02	1.77	1.96	2.27	1.9	2	2.16	1.87	2.07	2.4	1.73	1.91	1.89	2.47	2.4	1.37	1.09	1.45	1.73	1.77	2.21	2.72	2.97	2.91	2.96	2.87	2.63	2.66	2.6	2.91	2.22	2.33	2.24	2.21	2.48
Cer 18:1;O2/24:1	Cer	Positive	M+H	648.629	6.69	Cer d18:1/16:0-d7	0.108574	1.42	1.24	1.33	1.77	1.28	1.55	1.66	1.48	1.65	1.68	1.49	1.64	1.5	2.09	1.99	1.22	0.983	1.15	1.58	1.27	2.23	2.4	2.42	2.68	2.75	2.92	2.87	2.39	2.67	2.76	2.33	2.26	2.05	2.12	2.38
Cer 18:1;O2/26:0	Cer	Positive	M+H	678.676	7.82	Cer d18:1/16:0-d7	0.187405	0.119	0.121	0.115	0.126	0.125	0.122	0.146	0.136	0.123	0.178	0.107	0.149	0.118	0.165	0.179	0.104	0.0902	0.105	0.109	0.114	0.112	0.182	0.194	0.137	0.183	0.136	0.159	0.159	0.14	0.164	0.121	0.127	0.134	0.102	0.178
Cer 18:2;O2/16:0	Cer	Positive	M+H	536.504	4.37	Cer d18:1/16:0-d7	0.0790353	1.24	0.954	1.24	1.35	1.19	1.6	1.86	1.51	1.71	1.89	1.52	1.84	1.43	1.9	1.96	1.33	1.13	1.07	1.65	1.49	4.6	5.43	4.88	5.07	5.03	8.15	7.92	6.87	6.05	6.92	5.96	5.9	5.48	5.12	6.19
Cer 18:2;O2/22:0	Cer	Positive	M+H	620.598	6.2	Cer d18:1/16:0-d7	0.106658	0.649	0.533	0.593	0.704	0.625	0.7	0.736	0.641	0.634	0.748	0.705	0.744	0.67	0.793	0.847	0.606	0.433	0.503	0.585	0.558	0.946	1.12	1.18	0.982	1.18	1.39	1.27	1.28	1.05	1.31	1.11	1.12	1.01	0.892	1.17
Cer 18:2;O2/23:0	Cer	Positive	M+H	634.613	6.51	Cer d18:1/16:0-d7	0.121543	0.253	0.224	0.199	0.284	0.23	0.277	0.285	0.22	0.272	0.281	0.266	0.286	0.232	0.355	0.342	0.209	0.163	0.167	0.245	0.218	0.333	0.402	0.368	0.4	0.396	0.438	0.434	0.335	0.404	0.394	0.356	0.342	0.283	0.322	0.366
Cer 18:2;O2/24:1	Cer	Positive	M+H	646.613	6.21	Cer d18:1/16:0-d7	0.098461	1.23	0.991	1.1	1.31	1.18	1.33	1.45	1.26	1.23	1.4	1.37	1.4	1.3	1.47	1.58	1.17	0.832	0.984	1.13	1.07	1.81	2.07	2.22	1.79	2.21	2.45	2.29	2.34	1.91	2.33	1.96	2.04	1.82	1.58	2.11
DG 34:1	DG	Positive	M+NH4	612.556	5.9	DG 15:0/18:1-d7	0.178078	3.95	2.56	1.93	7.82	1.58	3.8	3.37	2.11	13	1.59	4.14	4.53	2.1	16.1	1.57	2.54	3.37	2.01	14.6	1.26	4.23	4.2	2.54	13.6	2.04	4.43	4.38	2.25	15.6	1.94	3.99	3.35	1.97	13.4	1.53
DG 34:2	DG	Positive	M+NH4	610.54	5.48	DG 15:0/18:1-d7	0.12726	10.3	6.97	4.84	18.5	3.41	10.2	6.96	4.69	26.3	3.38	11.2	12.2	4.46	34.9	3.32	6.01	9.59	4.15	33.5	2.89	8.82	8.49	5.07	29.3	4.24	10.1	11.5	5.35	31	5.39	9.6	7.98	4.24	26.4	3.33
DG 34:3	DG	Positive	M+NH4	608.525	5.05	DG 15:0/18:1-d7	0.143582	3.5	2.14	1.91	7.5	0.996	4.21	3.02	1.82	13.9	1.14	4.09	4.56	1.96	19.4	1.13	2.58	4.12	1.82	13.9	1.06	3.96	3.79	2.28	14.4	2.03	3.91	3.96	1.96	15.6	1.18	3.29	3.7	1.97	12.7	1.28
DG 36:1	DG	Positive	M+NH4	640.587	6.5	DG 15:0/18:1-d7	0.120531	0.54	0.479	0.246	1.38	0.327	0.559	0.594	0.238	2.29	0.349	0.633	0.794	0.256	2.6	0.379	0.447	0.638	0.268	2.75	0.248	0.654	0.79	0.364	2.44	0.404	0.625	0.863	0.434	2.73	0.415	0.553	0.691	0.336	2.22	0.329
DG 36:2	DG	Positive	M+NH4	638.572	6.05	DG 15:0/18:1-d7	0.13328	10.6	6.64	5.26	27.9	3.97	10.2	11.1	5.74	52.9	4.02	13.5	14.5	5.33	61.4	4.54	8.36	11.3	5.37	51.7	3.47	12.5	11	6.26	43.9	5.91	12.5	13.5	6.11	47.4	5.28	11.9	10.5	5.27	39.3	4.52
DG 36:3	DG	Positive	M+NH4	636.556	5.6	DG 15:0/18:1-d7	0.103642	20	12.4	10.8	57.8	7.2	24.4	22.5	11.8	89.1	7.19	23.5	31.9	9.61	119	8.1	16.5	26	10.5	109	6.55	20.9	22.6	12.5	89.1	11.6	25.6	28.4	11.7	115	10.6	22.2	22.7	10.9	83.4	9.19
DG 36:4	DG	Positive	M+NH4	634.54	5.09	DG 15:0/18:1-d7	0.135697	8.66	6.99	4.58	24.3	3.06	9.89	11	5.28	43.3	3.18	11.9	16.4	5.41	57.2	4.48	6.86	13.5	6.34	63.5	3.59	11.2	12.1	6.8	40.7	6.12	10.4	13.6	6.48	53.4	5.1	11	11.9	5.19	41.3	4.58
DG 38:4	DG	Positive	M+NH4	662.572	5.9	DG 15:0/18:1-d7	0.103009	20.2	22.9	19.9	22.7	19.8	19.2	20.4	18.3	28.9	19.8	22.4	23.9	19.8	31.1	22	16.3	15.3	18.5	27.8	19.5	24.6	25.8	22.9	32.3	27.4	27.7	28.1	25.1	36.4	29.6	27.6	23.4	21.9	30.8	24.2
DG 38:5	DG	Positive	M+NH4	660.556	5.38	DG 15:0/18:1-d7	0.101253	5.55	4.75	5.04	7.47	3.71	5.61	5.54	4.63	10.2	4.36	5.97	6.17	4.61	11.6	4.29	4.51	4.2	4.27	12.2	3.82	6.07	7.17	5.57	11.2	5.33	6.29	7.31	6.44	12.2	5.5	6.48	6.81	5.1	10.3	4.82
DG 40:7	DG	Positive	M+NH4	684.556	5.19	DG 15:0/18:1-d7	0.137079	4.08	2.86	3.17	5.01	1.95	3.53	3.37	3.16	6.86	1.95	3.78	3.97	2.99	8.5	2.33	2.86	3.01	2.57	8.95	1.94	4	3.99	2.92	6.83	2.79	4.21	4.46	3.95	8.24	2.71	3.35	3.54	2.96	6.42	2.42
HexCer 18:1;O2/22:0	HexCer	Positive	M+H	784.666	6.07	LacCer d18:1/17:0	0.0969275	0.997	0.796	1.11	1.08	1.04	1.12	0.721	0.57	0.692	0.668	0.768	0.639	0.563	0.956	0.848	0.63	0.379	0.607	0.57	0.589	0.68	0.628	0.827	1.03	0.768	0.762	0.785	0.611	0.67	0.65	0.608	0.508	0.386	0.526	0.532
LPC 14:0	LPC	Positive	M+H	468.308	2.45	LPC 18:1-d7	0.179909	0.00516	0.00483	0.00587	0.00509	0.00537	0.00427	0.00408	0.00544	0.00498	0.00685	0.0037	0.00456	0.0049	0.00465	0.00603	0.00328	0.00322	0.00383	0.00283	0.00518	0.0083	0.00839	0.00974	0.0077	0.00849	0.00961	0.0116	0.0108	0.0117	0.0114	0.00766	0.00997	0.0116	0.0101	0.0093
LPC 15:0	LPC	Positive	M+H	482.324	2.53	LPC 18:1-d7	0.0911256	0.0298	0.0252	0.0261	0.0263	0.0279	0.0289	0.0126	0.0299	0.0126	0.0295	0.0258	0.0126	0.0126	0.0297	0.028	0.0126	0.0313	0.0258	0.0126	0.0126	0.0272	0.0353	0.0284	0.0297	0.0324	0.0299	0.0391	0.027	0.0329	0.0334	0.0336	0.03	0.0358	0.0382	0.0292
LPC 16:0	LPC	Positive	M+H	496.34	2.61	LPC 18:1-d7	0.0763501	2.55	2.71	2.69	2.53	2.47	2.39	2.38	2.53	2.47	3.28	2.23	2.26	2.14	2.58	2.66	1.88	1.67	1.59	1.79	2.04	3.18	3.22	2.84	2.94	3.34	3.07	3.26	2.6	3.23	3.59	2.22	2.41	2.29	2.63	2.64
LPC 16:1	LPC	Positive	M+H	494.324	2.49	LPC 18:1-d7	0.102623	0.0338	0.0262	0.034	0.0243	0.0306	0.0269	0.0227	0.0295	0.0247	0.0384	0.0225	0.0219	0.0239	0.0261	0.0338	0.019	0.019	0.0207	0.0151	0.0255	0.046	0.0476	0.0514	0.0446	0.052	0.0595	0.0572	0.0559	0.0575	0.0643	0.0473	0.0458	0.0629	0.0544	0.0509
LPC 17:0	LPC	Positive	M+H	510.355	2.68	LPC 18:1-d7	0.083872	0.0446	0.0411	0.0345	0.0382	0.0393	0.0409	0.0361	0.033	0.0415	0.042	0.0388	0.0326	0.0295	0.0338	0.0399	0.0315	0.0213	0.018	0.0285	0.0268	0.0361	0.0403	0.0365	0.0453	0.0433	0.0385	0.0373	0.0296	0.0392	0.0376	0.028	0.025	0.0277	0.0346	0.0276
LPC 18:0	LPC	Positive	M+H	524.371	2.78	LPC 18:1-d7	0.104935	1.71	1.8	2.21	1.68	1.77	1.64	1.46	1.8	1.8	2.17	1.27	1.73	1.6	1.77	1.69	1.2	1.14	1.12	1.18	1.24	1.41	1.84	1.9	1.76	1.88	1.64	1.65	1.54	1.8	1.76	1.01	1.39	1.23	1.49	1.41
LPC 18:1	LPC	Positive	M+H	522.355	2.65	LPC 18:1-d7	0.0412864	0.66	0.605	0.678	0.615	0.676	0.663	0.588	0.625	0.588	0.767	0.613	0.564	0.553	0.575	0.721	0.447	0.378	0.446	0.432	0.538	1.09	0.922	0.949	0.964	1.1	1.23	1.16	1.03	1.14	1.28	0.985	0.912	0.907	0.972	1.05
LPC 18:2	LPC	Positive	M+H	520.34	2.53	LPC 18:1-d7	0.0831071	0.473	0.409	0.411	0.407	0.501	0.403	0.389	0.498	0.435	0.611	0.381	0.404	0.378	0.442	0.563	0.314	0.363	0.334	0.271	0.382	0.627	0.806	0.705	0.703	0.888	0.826	0.947	0.737	0.948	0.995	0.757	0.76	0.836	0.96	0.845
LPC 18:3	LPC	Positive	M+H	518.324	2.45	LPC 18:1-d7	0.121294	0.211	0.197	0.176	0.212	0.0446	0.166	0.183	0.0726	0.183	0.294	0.214	0.181	0.192	0.15	0.253	0.0223	0.164	0.0898	0.16	0.0994	0.254	0.249	0.247	0.236	0.294	0.238	0.194	0.199	0.269	0.263	0.187	0.0223	0.213	0.188	0.248
LPC 19:0	LPC	Positive	M+H	538.387	2.88	LPC 18:1-d7	0.114197	0.0157	0.0175	0.0183	0.015	0.0179	0.0153	0.0147	0.0147	0.0163	0.0196	0.0117	0.0158	0.0136	0.0158	0.019	0.0129	0.0113	0.0118	0.0114	0.0126	0.015	0.0188	0.0159	0.0145	0.0184	0.0135	0.017	0.0132	0.0165	0.0179	0.0102	0.0132	0.0123	0.0124	0.0127
LPC 20:0	LPC	Positive	M+H	552.402	3	LPC 18:1-d7	0.118071	0.00701	0.00967	0.00917	0.00791	0.00967	0.00773	0.00723	0.0083	0.00842	0.011	0.006	0.00839	0.00696	0.0083	0.0101	0.00583	0.00618	0.00517	0.00534	0.00766	0.00784	0.00903	0.00827	0.00759	0.0105	0.0075	0.00918	0.00728	0.00827	0.0107	0.00539	0.00652	0.00732	0.00661	0.00821
LPC 20:1	LPC	Positive	M+H	550.387	2.81	LPC 18:1-d7	0.103617	0.0116	0.012	0.0152	0.0115	0.0159	0.0102	0.0112	0.0146	0.0126	0.0191	0.00958	0.0119	0.0115	0.0117	0.0164	0.00804	0.00903	0.00987	0.009	0.0122	0.0135	0.017	0.0172	0.0154	0.0198	0.0179	0.0159	0.0147	0.0189	0.0224	0.0123	0.0145	0.0149	0.0156	0.0165
LPC 20:2	LPC	Positive	M+H	548.371	2.68	LPC 18:1-d7	0.123304	0.00665	0.00668	0.00837	0.00701	0.0117	0.0068	0.00701	0.00771	0.00885	0.0135	0.00619	0.00813	0.00704	0.00643	0.0129	0.00474	0.00518	0.00565	0.00591	0.00911	0.0106	0.0122	0.0132	0.014	0.0196	0.0139	0.0144	0.0168	0.0173	0.0219	0.0131	0.0124	0.0155	0.0141	0.0183
LPC 20:3	LPC	Positive	M+H	546.355	2.78	LPC 18:1-d7	0.0944519	0.0285	0.0296	0.0343	0.0305	0.0461	0.0268	0.0285	0.0439	0.0314	0.0632	0.0301	0.0316	0.0384	0.0378	0.0614	0.0255	0.0263	0.0317	0.0248	0.0437	0.0464	0.057	0.0626	0.0579	0.0869	0.0577	0.0587	0.0744	0.0811	0.105	0.0505	0.0528	0.0693	0.0733	0.091
LPC 20:4	LPC	Positive	M+H	544.34	2.52	LPC 18:1-d7	0.104653	0.766	0.654	0.638	0.659	0.597	0.583	0.606	0.729	0.64	0.725	0.661	0.632	0.603	0.701	0.695	0.497	0.624	0.592	0.409	0.528	0.99	1.28	1.22	1.08	1.19	1.32	1.48	1.33	1.56	1.5	1.42	1.39	1.7	1.57	1.36
LPC 22:0	LPC	Positive	M+H	580.434	3.3	LPC 18:1-d7	0.156044	0.00407	0.00503	0.00385	0.00453	0.00442	0.00341	0.00389	0.00418	0.00424	0.00586	0.00255	0.00406	0.00367	0.00452	0.00551	0.00304	0.00315	0.00226	0.00349	0.00403	0.00355	0.00513	0.00443	0.00407	0.00523	0.00367	0.00445	0.00364	0.00478	0.00462	0.00263	0.00347	0.00324	0.0041	0.00339
LPC 22:4	LPC	Positive	M+H	572.371	2.64	LPC 18:1-d7	0.137778	0.00546	0.00834	0.00724	0.00742	0.00645	0.00707	0.00862	0.00884	0.00718	0.00898	0.00836	0.00749	0.00772	0.00851	0.00805	0.00567	0.00683	0.00745	0.0066	0.00764	0.0151	0.0161	0.0142	0.0147	0.0149	0.0163	0.0183	0.0191	0.0239	0.0202	0.0178	0.0205	0.0186	0.0213	0.0213
LPC 22:5	LPC	Positive	M+H	570.355	2.53	LPC 18:1-d7	0.113096	0.0154	0.0182	0.018	0.0175	0.0189	0.0176	0.0193	0.0245	0.019	0.0269	0.0206	0.0187	0.0203	0.0213	0.0254	0.0196	0.0183	0.0203	0.0144	0.0189	0.0335	0.0453	0.039	0.0359	0.0464	0.0463	0.0482	0.0556	0.0599	0.0574	0.0503	0.0517	0.063	0.0571	0.0553
LPC 22:6	LPC	Positive	M+H	568.34	2.49	LPC 18:1-d7	0.125852	0.333	0.271	0.256	0.291	0.259	0.248	0.281	0.307	0.303	0.325	0.322	0.31	0.269	0.336	0.313	0.287	0.284	0.258	0.208	0.303	0.552	0.613	0.589	0.51	0.548	0.709	0.726	0.739	0.907	0.732	0.817	0.834	0.967	0.883	0.715
LPC 24:0	LPC	Positive	M+H	608.465	3.65	LPC 18:1-d7	0.111836	0.0058	0.00789	0.00628	0.0064	0.00648	0.00534	0.00606	0.00624	0.00681	0.00812	0.00513	0.0066	0.00492	0.00606	0.00742	0.0049	0.00461	0.00356	0.00435	0.00512	0.00527	0.00718	0.00583	0.00649	0.00669	0.00535	0.00719	0.00518	0.00621	0.00703	0.00404	0.00528	0.00463	0.00516	0.00519
LPC O-16:0	LPC-O	Negative	M+HCO2	526.351	2.69	LPC O-16:0-d4	0.159449	1.32	1.38	1.27	1.24	1.22	1.41	1.46	1.18	1.17	1.34	1.22	1.34	1.1	1.14	1.39	0.808	0.828	0.838	0.844	1.01	1.39	1.35	1.25	1.28	1.45	1.46	1.38	0.99	1.14	1.2	0.916	0.786	0.735	0.742	0.922
LPC O-16:1	LPC-O	Negative	M+HCO2	524.336	2.69	LPC O-16:0-d4	0.138447	0.131	0.0907	0.102	0.136	0.101	0.107	0.157	0.124	0.143	0.145	0.125	0.126	0.103	0.154	0.168	0.11	0.0718	0.0891	0.121	0.129	0.105	0.14	0.105	0.0418	0.11	0.01765	0.0353	0.143	0.01765	0.0911	0.01765	0.01765	0.01765	0.108	0.0653
LPC O-18:0	LPC-O	Negative	M+HCO2	554.383	2.89	LPC O-16:0-d4	0.149499	0.184	0.202	0.18	0.18	0.191	0.209	0.215	0.178	0.16	0.186	0.152	0.17	0.124	0.179	0.249	0.129	0.113	0.11	0.133	0.147	0.183	0.188	0.2	0.179	0.23	0.204	0.243	0.15	0.17	0.179	0.14	0.114	0.102	0.129	0.157
LPC O-18:1	LPC-O	Negative	M+HCO2	552.367	2.76	LPC O-16:0-d4	0.199078	0.506	0.548	0.524	0.428	0.446	0.642	0.572	0.508	0.429	0.525	0.485	0.517	0.432	0.391	0.619	0.341	0.328	0.332	0.299	0.389	0.816	0.677	0.654	0.614	0.688	0.895	0.888	0.566	0.604	0.693	0.599	0.477	0.424	0.46	0.462
LPC O-18:2	LPC-O	Negative	M+HCO2	550.351	2.72	LPC O-16:0-d4	0.197344	0.089	0.101	0.0964	0.0969	0.0965	0.128	0.132	0.108	0.103	0.104	0.104	0.104	0.105	0.103	0.115	0.0651	0.0846	0.0738	0.0904	0.105	0.183	0.191	0.185	0.171	0.217	0.261	0.261	0.205	0.225	0.242	0.176	0.166	0.156	0.161	0.161
LPE 16:0	LPE	Negative	M-H	452.278	2.64	LPE 18:1-d7	0.0768681	4.75	5.33	5.42	5.15	4.55	5.32	4.87	3.9	3.77	4.01	4.21	4.21	3.46	3.89	4.29	2.29	2.84	2.84	2.56	3.2	6.03	5.47	4.59	5.4	5.54	6.66	7.33	4.15	5.12	5.67	4.93	4.33	3.58	3.91	4.41
LPE 16:1	LPE	Negative	M-H	450.263	2.53	LPE 18:1-d7	0.14167	0.394	0.381	0.474	0.32	0.329	0.426	0.344	0.267	0.305	0.284	0.348	0.264	0.313	0.29	0.249	0.112	0.15	0.212	0.186	0.145	0.4	0.337	0.347	0.41	0.342	0.509	0.496	0.281	0.288	0.342	0.311	0.183	0.222	0.227	0.21
LPE 17:0	LPE	Negative	M-H	466.294	2.73	LPE 18:1-d7	0.107543	0.0694	0.0723	0.0985	0.079	0.0884	0.099	0.0798	0.0835	0.0761	0.0835	0.087	0.0678	0.0699	0.0704	0.102	0.0558	0.0478	0.0561	0.0579	0.0592	0.109	0.0992	0.101	0.109	0.112	0.143	0.147	0.0913	0.104	0.13	0.111	0.0909	0.0738	0.0789	0.101
LPE 18:0	LPE	Negative	M-H	480.31	2.82	LPE 18:1-d7	0.0800102	4.32	5.02	5.56	4.98	4.87	5.71	5.67	5.68	4.43	5.42	5.3	5.41	4.61	4.82	5.56	3.65	3.4	3.86	3.65	4.35	7.05	7.38	7.19	7.21	8.22	9.54	10.3	7.55	7.99	9.01	7.64	6.52	5.69	6.6	6.75
LPE 18:1	LPE	Negative	M-H	478.294	2.69	LPE 18:1-d7	0.0955253	7.64	8.83	9.05	7.66	7.02	8.65	7.26	5.32	5.68	6.09	6.49	6.5	5.69	6.14	6.37	3.44	4.31	4.61	3.94	4.76	8.64	7.9	7.39	9.04	8.11	9.53	10.7	6.36	7.91	8.85	7.85	6.55	5.71	5.92	7.03
LPE 18:2	LPE	Negative	M-H	476.278	2.57	LPE 18:1-d7	0.090249	2.43	2.76	2.82	2.23	2.46	2.51	2.37	1.88	1.8	2.37	2.26	2.17	1.9	2.05	2.28	1.14	1.28	1.36	1.29	1.51	2.58	2.92	2.35	2.94	2.83	2.87	3.6	2.16	2.58	3.29	2.43	2.14	1.81	2.18	2.3
LPE 20:0	LPE	Negative	M-H	508.341	3.06	LPE 18:1-d7	0.0776292	0.239	0.281	0.338	0.304	0.253	0.256	0.27	0.25	0.264	0.255	0.233	0.252	0.216	0.242	0.266	0.183	0.165	0.163	0.185	0.188	0.228	0.267	0.298	0.238	0.289	0.24	0.282	0.261	0.244	0.271	0.17	0.166	0.159	0.192	0.172
LPE 20:1	LPE	Negative	M-H	506.325	2.86	LPE 18:1-d7	0.0998532	0.0681	0.0567	0.0617	0.0784	0.0702	0.0789	0.0784	0.0771	0.0721	0.0724	0.0852	0.0753	0.0667	0.0695	0.0862	0.0421	0.0422	0.0448	0.0441	0.0614	0.142	0.122	0.121	0.0974	0.129	0.154	0.147	0.123	0.145	0.145	0.119	0.0951	0.101	0.102	0.123
LPE 20:3	LPE	Negative	M-H	502.294	2.62	LPE 18:1-d7	0.107599	0.378	0.396	0.529	0.442	0.445	0.396	0.356	0.345	0.309	0.343	0.351	0.345	0.381	0.328	0.401	0.166	0.239	0.313	0.2	0.275	0.387	0.401	0.456	0.417	0.479	0.4	0.513	0.361	0.397	0.498	0.341	0.321	0.343	0.303	0.397
LPE 20:4	LPE	Negative	M-H	500.278	2.54	LPE 18:1-d7	0.102044	35.6	38.9	39.8	33.1	35.8	33.5	34	26.3	28.1	22.9	31.2	30.4	29.8	30.8	30.7	15.4	20.7	21.3	19.6	20	29.9	37.3	30.8	37.8	34.3	33.7	45.1	25.8	31	37.5	30.4	27.3	23.6	25.5	26.7
LPE 20:5	LPE	Negative	M-H	498.263	2.45	LPE 18:1-d7	0.119813	0.178	0.173	0.231	0.223	0.168	0.142	0.175	0.141	0.155	0.135	0.127	0.132	0.156	0.153	0.154	0.0543	0.0915	0.146	0.0983	0.0876	0.157	0.16	0.17	0.197	0.194	0.137	0.241	0.148	0.161	0.182	0.122	0.11	0.13	0.133	0.143
LPE 22:4	LPE	Negative	M-H	528.31	2.68	LPE 18:1-d7	0.127413	1.6	1.93	1.91	1.8	1.53	1.52	1.6	1.01	1.27	1.14	1.28	1.39	1.18	1.4	1.29	0.624	1.03	1	0.877	0.923	1.43	1.47	1.42	1.59	1.4	1.45	1.9	0.867	1.42	1.43	1.22	1.07	0.915	1.04	1.12
LPE 22:5	LPE	Negative	M-H	526.294	2.55	LPE 18:1-d7	0.125757	1.29	1.39	1.55	1.29	1.2	1.19	1.36	1.04	0.917	1	1.11	1.29	1.07	1.02	1.15	0.552	0.828	0.909	0.638	0.784	1.13	1.49	1.21	1.18	1.25	1.09	1.65	0.93	1.07	1.29	1.01	0.99	0.859	0.873	0.94
LPE 22:6	LPE	Negative	M-H	524.278	2.51	LPE 18:1-d7	0.0839078	22.1	21.9	20.7	19.7	20.9	21.4	20.6	14.5	18.6	16.8	19.9	17.2	16	20	16.8	9.83	12.6	13	12	11.1	17.6	20	15.2	20.4	18.9	19.5	25	12.7	16.6	19.3	17	13.6	11.6	12.1	14.6
LPE O-16:1	LPE-O	Negative	M-H	436.283	2.73	LPE 18:1-d7	0.0568042	0.795	0.838	0.924	0.895	0.812	1.13	0.898	1.07	0.837	0.893	0.995	0.911	0.778	0.828	0.97	0.609	0.592	0.673	0.666	0.662	1.42	1.3	1.32	1.32	1.4	1.76	1.65	1.4	1.3	1.5	1.36	1.12	1.11	1.14	1.07
LPE O-18:1	LPE-O	Negative	M-H	464.315	2.95	LPE 18:1-d7	0.0769222	0.723	0.753	0.776	0.884	0.742	0.943	0.944	0.889	0.725	0.851	0.85	0.773	0.645	0.737	0.894	0.558	0.542	0.551	0.642	0.597	1.11	1.15	1.07	1.14	1.26	1.36	1.4	1.08	1.16	1.23	1.12	0.926	0.825	0.966	0.937
LPE O-18:2	LPE-O	Negative	M-H	462.299	2.76	LPE 18:1-d7	0.070159	0.875	0.841	0.994	0.856	0.786	1.21	0.92	1.02	0.825	0.943	1.09	0.967	0.714	0.853	1.09	0.763	0.596	0.65	0.633	0.714	1.45	1.23	1.27	1.29	1.39	1.76	1.66	1.48	1.22	1.6	1.36	1.1	1.05	1.18	1.13
LPE O-20:1	LPE-O	Negative	M-H	492.346	3.21	LPE 18:1-d7	0.261702	0.0398	0.0342	0.0482	0.0407	0.0424	0.0499	0.0421	0.0403	0.0444	0.0487	0.0398	0.0308	0.0208	0.0426	0.0417	0.039	0.0253	0.0265	0.0333	0.0318	0.0438	0.0413	0.0447	0.0473	0.0525	0.0554	0.0526	0.041	0.0541	0.0618	0.0452	0.0348	0.0363	0.0402	0.0472
LPG 16:0	LPG	Negative	M-H	483.273	2.53	LPG 17:1	0.0620584	0.0911	0.0962	0.0863	0.0926	0.0841	0.103	0.122	0.112	0.0883	0.126	0.122	0.118	0.0986	0.0916	0.129	0.103	0.0946	0.0843	0.0776	0.0974	0.359	0.332	0.31	0.331	0.297	0.47	0.446	0.387	0.43	0.405	0.423	0.478	0.344	0.452	0.359
LPG 18:1	LPG	Negative	M-H	509.288	2.57	LPG 17:1	0.113933	0.208	0.249	0.243	0.274	0.161	0.218	0.258	0.231	0.197	0.217	0.23	0.272	0.207	0.207	0.224	0.17	0.145	0.152	0.171	0.173	0.529	0.561	0.522	0.547	0.415	0.599	0.588	0.527	0.586	0.546	0.545	0.517	0.48	0.626	0.474
LPG 18:2	LPG	Negative	M-H	507.273	2.47	LPG 17:1	0.0911471	0.0931	0.0915	0.0927	0.103	0.0715	0.0817	0.144	0.11	0.0812	0.0818	0.0836	0.126	0.0873	0.0938	0.0892	0.0672	0.0751	0.0674	0.0648	0.0609	0.164	0.181	0.165	0.177	0.168	0.181	0.226	0.194	0.178	0.175	0.178	0.187	0.162	0.178	0.163
LPI 18:0	LPI	Negative	M-H	599.32	2.65	LPI 17:1	0.100785	0.203	0.301	0.337	0.306	0.424	0.286	0.288	0.25	0.266	0.293	0.266	0.233	0.213	0.275	0.327	0.157	0.173	0.163	0.182	0.247	0.0953	0.119	0.0761	0.122	0.101	0.111	0.141	0.0691	0.0884	0.118	0.0793	0.0871	0.0717	0.0587	0.0921
LPI 20:4	LPI	Negative	M-H	619.289	2.43	LPI 17:1	0.0773613	0.56	0.485	0.479	0.696	0.673	0.422	0.453	0.653	0.548	0.703	0.592	0.588	0.486	0.635	0.706	0.444	0.401	0.447	0.426	0.482	0.128	0.124	0.192	0.161	0.191	0.119	0.129	0.12	0.122	0.135	0.12	0.124	0.0963	0.0823	0.101
LPS 18:0	LPS	Negative	M-H	524.299	2.62	LPI 17:1	0.109336	2.34	2.4	2.5	2.61	2.24	3.8	3.22	3.54	3.06	3.86	4.83	4.5	3.63	3.32	4.17	4.48	3.58	3.94	2.83	4.37	8.02	7.96	7.53	7.31	6.51	12	10	9.06	12.2	9.06	12.4	13	10.1	10.2	10.2
LPS 18:1	LPS	Negative	M-H	522.284	2.45	LPI 17:1	0.117636	0.416	0.457	0.467	0.395	0.374	0.499	0.39	0.462	0.388	0.523	0.577	0.518	0.473	0.434	0.505	0.492	0.364	0.441	0.342	0.419	1.16	1.12	1.2	1.04	0.986	1.62	1.34	1.28	1.54	1.33	1.58	1.54	1.34	1.41	1.24
LPS 20:4	LPS	Negative	M-H	544.268	2.37	LPI 17:1	0.094545	0.877	0.866	0.914	1.18	0.918	0.809	0.921	1.28	1.03	1.13	1.16	1.15	0.974	1.23	1.33	1.04	0.924	0.93	0.988	1.12	2.22	2.21	2.64	2.14	2.63	2.85	2.65	3.35	3.63	3.23	3.24	3.14	3.24	3.21	3.02
PC 29:0	PC	Positive	M+H	692.522	3.98	PC 15:0/18:1-d7	0.176788	0.000645	0.000689	0.000768	0.000598	0.000812	0.000427	0.000429	0.000624	0.000468	0.000895	0.000568	0.000679	0.000589	0.000677	0.000833	0.000404	0.000344	0.000634	0.000589	0.000602	0.000578	0.000606	0.000903	0.000689	0.000795	0.00046	0.000789	0.000611	0.000806	0.000753	0.000485	0.000638	0.000404	0.000551	0.000647
PC 30:0	PC	Positive	M+H	706.538	4.17	PC 15:0/18:1-d7	0.126174	0.0835	0.105	0.088	0.0876	0.0945	0.0667	0.0823	0.0898	0.0887	0.0703	0.0796	0.0891	0.0826	0.0964	0.092	0.0496	0.0571	0.0812	0.0727	0.0721	0.0772	0.105	0.118	0.0913	0.111	0.0695	0.103	0.09	0.0816	0.0903	0.0528	0.0679	0.0629	0.0709	0.0718
PC 30:1	PC	Positive	M+H	704.522	3.87	PC 15:0/18:1-d7	0.059904	0.00316	0.00455	0.00397	0.00408	0.004	0.00274	0.00412	0.00374	0.00322	0.00331	0.00334	0.00403	0.00325	0.00394	0.00417	0.00226	0.00261	0.00347	0.00302	0.00337	0.00268	0.00426	0.00465	0.00352	0.00413	0.0025	0.0037	0.00412	0.00396	0.00413	0.00215	0.00353	0.00247	0.00308	0.00324
PC 31:0	PC	Positive	M+H	720.554	4.39	PC 15:0/18:1-d7	0.0987904	0.0505	0.0478	0.0557	0.0454	0.0458	0.0508	0.0467	0.0462	0.0456	0.0379	0.0496	0.044	0.0381	0.0564	0.0536	0.0367	0.0331	0.0389	0.0395	0.0364	0.0513	0.0435	0.0561	0.0467	0.0595	0.0462	0.0415	0.0458	0.0426	0.0512	0.0408	0.0407	0.0315	0.0348	0.0387
PC 31:2	PC	Positive	M+H	716.522	3.72	PC 15:0/18:1-d7	0.042255	0.0292	0.0266	0.0299	0.033	0.0355	0.0281	0.0325	0.0308	0.0366	0.0422	0.0321	0.0321	0.0258	0.0347	0.0409	0.0241	0.0192	0.0229	0.0283	0.0342	0.031	0.0311	0.0309	0.0348	0.0428	0.0287	0.0304	0.0341	0.0354	0.0408	0.0221	0.0246	0.0235	0.0267	0.0317
PC 32:0	PC	Positive	M+H	734.569	4.59	PC 15:0/18:1-d7	0.118853	3.6	3.43	3.25	3.04	4.37	2.9	3.41	3	2.87	2.91	3.63	3.16	2.82	3.41	3.37	2.33	2.39	2.71	2.41	2.88	3.27	3.21	3.61	3.4	4.56	2.73	3.16	2.87	3.08	3.64	2.87	2.29	2.26	2.56	2.84
PC 32:1	PC	Positive	M+H	732.554	4.26	PC 15:0/18:1-d7	0.0910551	0.228	0.232	0.253	0.239	0.213	0.217	0.22	0.236	0.196	0.174	0.207	0.198	0.213	0.239	0.242	0.151	0.145	0.216	0.203	0.171	0.232	0.241	0.281	0.202	0.249	0.199	0.199	0.237	0.205	0.277	0.189	0.174	0.137	0.167	0.186
PC 32:2	PC	Positive	M+H	730.538	3.93	PC 15:0/18:1-d7	0.0593194	0.0189	0.0211	0.0201	0.0206	0.0244	0.0163	0.0197	0.0199	0.0163	0.0214	0.0183	0.0197	0.018	0.022	0.0256	0.0135	0.0121	0.0182	0.0184	0.0184	0.0162	0.0211	0.0263	0.0215	0.0266	0.0134	0.0191	0.0212	0.0277	0.0265	0.0124	0.0194	0.0147	0.0164	0.0207
PC 33:0	PC	Positive	M+H	748.585	4.8	PC 15:0/18:1-d7	0.073325	0.044	0.0458	0.0378	0.0407	0.0414	0.0416	0.0385	0.0341	0.0333	0.0394	0.04	0.0377	0.029	0.0379	0.0426	0.03	0.0224	0.0315	0.0273	0.0361	0.0391	0.0372	0.0391	0.0376	0.0452	0.0355	0.0333	0.0324	0.0326	0.0443	0.0275	0.0304	0.0249	0.027	0.0351
PC 33:1	PC	Positive	M+H	746.569	4.47	PC 15:0/18:1-d7	0.0324884	0.027	0.0257	0.0298	0.0283	0.0279	0.0278	0.026	0.0257	0.028	0.0282	0.0274	0.0262	0.0228	0.0269	0.0282	0.0191	0.0156	0.0185	0.0212	0.0221	0.0267	0.0265	0.0262	0.0285	0.0303	0.0267	0.026	0.0263	0.0265	0.0268	0.0197	0.02	0.0188	0.0202	0.0224
PC 33:2	PC	Positive	M+H	744.554	4.14	PC 15:0/18:1-d7	0.0906028	0.00833	0.00764	0.00717	0.00778	0.0092	0.00626	0.00785	0.00668	0.00724	0.0063	0.00811	0.00676	0.00684	0.00757	0.00883	0.00548	0.00488	0.00563	0.00625	0.00748	0.00936	0.00855	0.00807	0.00759	0.01	0.0065	0.00748	0.00709	0.00834	0.00966	0.00638	0.00593	0.00419	0.00634	0.00766
PC 33:3	PC	Positive	M+H	742.538	3.77	PC 15:0/18:1-d7	0.11487	0.0607	0.0573	0.0597	0.0608	0.0977	0.0527	0.0665	0.0703	0.0677	0.0755	0.0758	0.0667	0.0591	0.0806	0.0929	0.0508	0.0471	0.0599	0.0543	0.0766	0.0651	0.0654	0.0804	0.0701	0.116	0.0529	0.0609	0.0662	0.0768	0.0894	0.0617	0.0523	0.0505	0.0624	0.0758
PC 34:0	PC	Positive	M+H	762.601	5.1	PC 15:0/18:1-d7	0.0965145	0.28	0.326	0.248	0.297	0.308	0.243	0.311	0.247	0.268	0.286	0.293	0.289	0.223	0.33	0.375	0.187	0.201	0.23	0.249	0.292	0.283	0.319	0.344	0.284	0.387	0.233	0.278	0.29	0.332	0.376	0.213	0.266	0.176	0.223	0.279
PC 34:1	PC	Positive	M+H	760.585	4.69	PC 15:0/18:1-d7	0.0624211	2.96	3.04	3.03	2.79	3.2	2.73	3.28	2.67	2.45	2.55	3.22	2.56	2.47	2.55	3.13	2.01	1.88	2.32	2.34	2.26	2.86	3.31	3.5	2.97	3.77	2.6	2.67	2.93	2.71	3.26	2.1	2.4	1.98	2.17	2.47
PC 34:2	PC	Positive	M+H	758.569	4.33	PC 15:0/18:1-d7	0.100172	1.7	1.84	1.76	1.74	1.84	1.51	1.82	1.63	1.63	1.65	1.52	1.68	1.44	2.22	2.2	1.2	1.16	1.5	1.58	1.44	1.72	1.89	1.91	1.59	2.37	1.42	1.62	1.72	1.62	2.3	1.36	1.57	1.07	1.33	1.45
PC 34:3	PC	Positive	M+H	756.554	4.03	PC 15:0/18:1-d7	0.0615064	0.0688	0.0746	0.0696	0.0703	0.0858	0.0584	0.0698	0.0692	0.0694	0.0744	0.0686	0.0745	0.0595	0.0837	0.097	0.0494	0.0465	0.061	0.0621	0.076	0.0631	0.0823	0.101	0.0725	0.101	0.0563	0.0687	0.0722	0.0852	0.0874	0.05	0.0658	0.0494	0.0608	0.0784
PC 34:4	PC	Positive	M+H	754.538	3.9	PC 15:0/18:1-d7	0.0565235	0.00469	0.00501	0.00514	0.00525	0.00645	0.00373	0.00528	0.00516	0.00458	0.00645	0.00542	0.005	0.00471	0.00568	0.00724	0.00385	0.00331	0.00549	0.00462	0.00585	0.00408	0.00593	0.00736	0.00493	0.00773	0.00358	0.00437	0.00606	0.00573	0.00669	0.00357	0.00506	0.00397	0.0048	0.00577
PC 35:0	PC	Positive	M+H	776.616	5.3	PC 15:0/18:1-d7	0.140576	0.00336	0.00327	0.00277	0.00301	0.00351	0.00268	0.0031	0.00221	0.0028	0.00306	0.00304	0.00288	0.00214	0.00298	0.00367	0.00222	0.00179	0.00219	0.00233	0.0028	0.00287	0.00308	0.00322	0.00267	0.00421	0.00259	0.00276	0.00262	0.00276	0.00353	0.00234	0.00293	0.00179	0.00222	0.0029
PC 35:1	PC	Positive	M+H	774.601	4.94	PC 15:0/18:1-d7	0.0945056	0.0622	0.0589	0.0534	0.0547	0.0582	0.0602	0.0525	0.0474	0.0507	0.0578	0.0642	0.0488	0.0423	0.0611	0.0618	0.04	0.0349	0.0474	0.0392	0.0577	0.0673	0.0558	0.0622	0.051	0.0712	0.0458	0.0476	0.049	0.055	0.064	0.0419	0.0427	0.0343	0.0416	0.0508
PC 35:2	PC	Positive	M+H	772.585	4.56	PC 15:0/18:1-d7	0.109974	0.027	0.0249	0.0247	0.0248	0.0338	0.0229	0.0226	0.0245	0.0261	0.0234	0.0286	0.0236	0.0206	0.0305	0.0311	0.0189	0.0161	0.0206	0.0204	0.0248	0.0273	0.0248	0.0292	0.0261	0.0361	0.0217	0.0239	0.0237	0.0303	0.0307	0.0228	0.0184	0.0168	0.0207	0.0238
PC 35:3	PC	Positive	M+H	770.569	4.23	PC 15:0/18:1-d7	0.11283	0.00431	0.00476	0.00391	0.0048	0.00516	0.00385	0.00373	0.00409	0.00419	0.00402	0.0049	0.00396	0.00385	0.00414	0.0058	0.00285	0.00284	0.00376	0.00405	0.00377	0.00449	0.005	0.00535	0.00436	0.00585	0.00364	0.00395	0.00388	0.00418	0.00575	0.00334	0.00309	0.00233	0.00357	0.00461
PC 35:4	PC	Positive	M+H	768.554	4.08	PC 15:0/18:1-d7	0.106393	0.00744	0.00602	0.0061	0.00669	0.00685	0.00658	0.00611	0.00625	0.00628	0.00577	0.00762	0.00617	0.00549	0.00768	0.00857	0.00555	0.00428	0.00496	0.0059	0.00613	0.00666	0.00759	0.008	0.00632	0.00902	0.00616	0.00588	0.00648	0.00816	0.00949	0.00647	0.00627	0.00463	0.00562	0.00692
PC 36:0	PC	Positive	M+H	790.632	5.62	PC 15:0/18:1-d7	0.0748245	0.011	0.0144	0.0125	0.014	0.0159	0.00992	0.0124	0.0105	0.0111	0.0146	0.0109	0.013	0.0107	0.0146	0.0169	0.00765	0.00846	0.0105	0.0105	0.0138	0.012	0.0134	0.0152	0.0126	0.0186	0.0105	0.0122	0.0118	0.014	0.0167	0.00855	0.012	0.00952	0.0109	0.0128
PC 36:1	PC	Positive	M+H	788.616	5.21	PC 15:0/18:1-d7	0.100828	0.839	0.856	0.771	0.814	0.913	0.665	0.787	0.722	0.751	0.828	0.767	0.757	0.677	0.896	1.01	0.574	0.49	0.687	0.703	0.816	0.759	0.806	0.908	0.788	1.08	0.678	0.741	0.807	0.836	0.985	0.549	0.678	0.545	0.621	0.827
PC 36:2	PC	Positive	M+H	786.601	4.81	PC 15:0/18:1-d7	0.0783626	1.71	1.85	1.5	1.71	1.76	1.57	1.78	1.52	1.57	1.67	1.52	1.73	1.31	1.71	1.83	1.2	0.949	1.32	1.28	1.43	1.44	1.66	1.71	1.62	1.86	1.3	1.4	1.41	1.43	1.76	1.06	1.26	1.04	1.22	1.54
PC 36:3	PC	Positive	M+H	784.585	4.46	PC 15:0/18:1-d7	0.069512	0.692	0.75	0.729	0.772	0.863	0.689	0.764	0.831	0.747	0.815	0.728	0.756	0.636	0.8	0.955	0.575	0.554	0.606	0.645	0.711	0.674	0.754	0.812	0.78	0.984	0.676	0.656	0.793	0.802	0.877	0.524	0.645	0.561	0.63	0.72
PC 36:4	PC	Positive	M+H	782.569	4.28	PC 15:0/18:1-d7	0.121789	2.9	2.88	2.7	2.92	2.75	2.67	3.06	2.73	2.4	2.51	2.79	2.68	2.58	3.14	3.54	2.21	2.18	2.8	2.49	2.73	3	3.1	3.35	2.3	3.64	2.54	2.52	2.96	2.8	4.31	2.74	2.66	1.74	2.25	2.96
PC 36:5	PC	Positive	M+H	780.554	3.98	PC 15:0/18:1-d7	0.0753888	0.0685	0.0632	0.0659	0.0702	0.0925	0.0546	0.0659	0.0756	0.0655	0.0947	0.0707	0.0703	0.067	0.0877	0.11	0.0551	0.0467	0.0702	0.0692	0.0858	0.0616	0.076	0.0988	0.0728	0.106	0.0514	0.0685	0.082	0.101	0.102	0.0524	0.0741	0.0574	0.0642	0.0897
PC 37:1	PC	Positive	M+H	802.632	5.48	PC 15:0/18:1-d7	0.0941744	0.00686	0.0066	0.00672	0.00692	0.00816	0.00616	0.00638	0.00581	0.0058	0.00669	0.0066	0.0064	0.00505	0.00714	0.00785	0.0047	0.00406	0.00518	0.005	0.0064	0.00636	0.00614	0.00762	0.00644	0.00899	0.00575	0.00593	0.00615	0.00651	0.00866	0.00494	0.0054	0.0042	0.005	0.00649
PC 37:2	PC	Positive	M+H	800.616	5.06	PC 15:0/18:1-d7	0.0869927	0.0123	0.0125	0.0117	0.012	0.0134	0.0113	0.0126	0.0113	0.0113	0.0133	0.0134	0.0119	0.0103	0.0145	0.0174	0.00856	0.00817	0.0112	0.0107	0.0145	0.0121	0.0128	0.0166	0.0126	0.0195	0.0104	0.01	0.0128	0.0137	0.0168	0.00951	0.0108	0.00849	0.0106	0.0136
PC 37:4	PC	Positive	M+H	796.585	4.51	PC 15:0/18:1-d7	0.0525519	0.0491	0.0396	0.0483	0.0449	0.0519	0.0426	0.0466	0.0427	0.049	0.0507	0.051	0.047	0.0391	0.0492	0.0556	0.0375	0.0277	0.0351	0.0427	0.0473	0.0484	0.0461	0.053	0.0496	0.0587	0.0426	0.0432	0.0541	0.0494	0.0509	0.0359	0.0369	0.0348	0.0361	0.0427
PC 37:6	PC	Positive	M+H	792.554	3.93	PC 15:0/18:1-d7	0.0836623	0.0222	0.0178	0.0147	0.0204	0.0183	0.0197	0.019	0.0189	0.0168	0.0186	0.028	0.0185	0.0155	0.023	0.0252	0.0203	0.0126	0.018	0.0208	0.0168	0.0212	0.019	0.024	0.0209	0.0231	0.0168	0.0167	0.0216	0.0296	0.0241	0.018	0.0207	0.0139	0.0194	0.0179
PC 38:0	PC	Positive	M+H	818.663	6.21	PC 15:0/18:1-d7	0.0862912	0.000779	0.000978	0.000807	0.000927	0.00123	0.000739	0.00102	0.000728	0.000795	0.000991	0.000805	0.000951	0.000788	0.00101	0.0012	0.000567	0.000525	0.00073	0.000687	0.000895	0.000792	0.00109	0.00101	0.000775	0.00135	0.00068	0.000893	0.00089	0.000957	0.00115	0.000578	0.000886	0.000668	0.000742	0.000879
PC 38:1	PC	Positive	M+H	816.648	5.68	PC 15:0/18:1-d7	0.0462802	0.0129	0.0154	0.0146	0.0155	0.0184	0.0117	0.0146	0.0128	0.0125	0.0161	0.013	0.0136	0.0133	0.0161	0.0201	0.00896	0.00896	0.0124	0.0109	0.0147	0.0139	0.0153	0.0175	0.0142	0.0218	0.0119	0.0135	0.0145	0.0147	0.0195	0.01	0.0119	0.0116	0.0111	0.0142
PC 38:2	PC	Positive	M+H	814.632	5.24	PC 15:0/18:1-d7	0.116083	0.0586	0.0641	0.0636	0.0613	0.0763	0.0459	0.0615	0.0565	0.0559	0.0738	0.0555	0.0591	0.0538	0.0663	0.0892	0.0413	0.0358	0.0557	0.053	0.0661	0.0538	0.0617	0.0768	0.0555	0.0895	0.049	0.0535	0.066	0.0589	0.0805	0.0421	0.0525	0.0438	0.0485	0.0701
PC 38:3	PC	Positive	M+H	812.616	4.93	PC 15:0/18:1-d7	0.093317	0.21	0.225	0.235	0.23	0.305	0.195	0.213	0.227	0.22	0.31	0.22	0.193	0.183	0.264	0.316	0.14	0.147	0.231	0.173	0.314	0.217	0.224	0.289	0.211	0.374	0.154	0.169	0.246	0.227	0.351	0.138	0.183	0.172	0.181	0.272
PC 38:4	PC	Positive	M+H	810.601	4.75	PC 15:0/18:1-d7	0.102985	2.04	1.88	1.85	2.28	2.59	1.77	2.32	2.04	1.89	2.21	1.94	2.08	1.99	2.06	2.47	1.32	1.37	1.83	1.74	1.87	1.96	2.16	2.68	2.3	2.63	1.52	1.82	2.25	1.87	2.25	1.43	1.92	1.75	1.88	2.04
PC 38:5	PC	Positive	M+H	808.585	4.39	PC 15:0/18:1-d7	0.0804738	1.14	1.03	1.14	1.06	1.14	0.955	1.17	1.3	1.11	1.14	1.16	1.18	1.1	1.43	1.45	1.01	0.884	1.16	1.07	1.02	1.15	1.22	1.46	0.998	1.58	0.939	0.993	1.35	1.11	1.45	1.04	1.11	0.934	0.94	1.1
PC 38:6	PC	Positive	M+H	806.569	4.14	PC 15:0/18:1-d7	0.0778827	4.07	3.46	3	3.39	3.89	2.88	3.51	3.59	3.51	3.41	4.38	3.46	3.51	4.07	4.12	3.14	2.59	3.12	3.15	3.57	4.04	4.17	4.8	3.15	4.51	3.21	3.26	3.93	4.14	3.95	3.25	3.49	2.58	3.12	3.64
PC 38:7	PC	Positive	M+H	804.554	3.85	PC 15:0/18:1-d7	0.0598968	0.0399	0.0324	0.0334	0.0375	0.0393	0.0279	0.0386	0.0396	0.0365	0.0408	0.0465	0.037	0.0357	0.045	0.0464	0.0341	0.0254	0.0378	0.0367	0.0389	0.0354	0.0398	0.0483	0.0335	0.0488	0.0299	0.0288	0.0463	0.0429	0.0409	0.0299	0.0355	0.0314	0.0325	0.0378
PC 39:4	PC	Positive	M+H	824.616	5.01	PC 15:0/18:1-d7	0.15156	0.0156	0.0159	0.0156	0.0161	0.0185	0.0144	0.0168	0.0169	0.0166	0.0188	0.0184	0.0163	0.0147	0.02	0.023	0.0129	0.0115	0.0161	0.0132	0.0202	0.0155	0.021	0.0225	0.0169	0.0254	0.0132	0.014	0.018	0.0193	0.0208	0.0115	0.0155	0.0129	0.0153	0.0185
PC 39:5	PC	Positive	M+H	822.601	4.55	PC 15:0/18:1-d7	0.148859	0.00407	0.00415	0.00466	0.00409	0.00567	0.00302	0.00433	0.00572	0.00503	0.004	0.00531	0.0045	0.00463	0.0055	0.00545	0.0037	0.00331	0.00424	0.00426	0.00547	0.00446	0.00495	0.0065	0.00478	0.00594	0.00354	0.00365	0.00587	0.00539	0.00588	0.00417	0.00394	0.00379	0.00395	0.00508
PC 39:6	PC	Positive	M+H	820.585	4.31	PC 15:0/18:1-d7	0.102684	0.0224	0.0185	0.0171	0.0195	0.0206	0.0187	0.0196	0.0208	0.0197	0.0206	0.0227	0.0179	0.0169	0.0272	0.0264	0.018	0.0136	0.0187	0.0197	0.0179	0.0235	0.022	0.0241	0.017	0.0282	0.0185	0.0169	0.0226	0.0203	0.0286	0.0198	0.0184	0.0132	0.0174	0.0179
PC 39:7	PC	Positive	M+H	818.569	4.02	PC 15:0/18:1-d7	0.0873261	0.00225	0.00196	0.00188	0.00233	0.00269	0.00192	0.00208	0.00263	0.00228	0.00312	0.00287	0.00257	0.00213	0.00293	0.004	0.00229	0.00149	0.0024	0.00242	0.00295	0.00228	0.00256	0.00374	0.00215	0.00348	0.00196	0.00214	0.00318	0.00348	0.00375	0.0021	0.00274	0.00235	0.00241	0.0032
PC 40:0	PC	Positive	M+H	846.695	6.81	PC 15:0/18:1-d7	0.126715	0.00117	0.00149	0.0013	0.0014	0.00161	0.00105	0.00141	0.00105	0.00113	0.00142	0.00103	0.00133	0.00106	0.00133	0.00169	0.000757	0.000817	0.00098	0.000887	0.00125	0.00106	0.00144	0.00157	0.00116	0.00198	0.00103	0.00143	0.00125	0.00119	0.00161	0.000936	0.00122	0.00086	0.000954	0.0013
PC 40:4	PC	Positive	M+H	838.632	5.25	PC 15:0/18:1-d7	0.0723147	0.0265	0.0315	0.0257	0.0327	0.0301	0.0224	0.0318	0.0277	0.0305	0.0316	0.033	0.0312	0.0253	0.0387	0.0442	0.0214	0.0234	0.0291	0.0296	0.0337	0.0279	0.0339	0.0389	0.0311	0.0462	0.0223	0.0266	0.0325	0.0378	0.0381	0.0222	0.0285	0.0207	0.0276	0.0325
PC 40:6	PC	Positive	M+H	834.601	4.56	PC 15:0/18:1-d7	0.10896	0.593	0.549	0.536	0.564	0.74	0.468	0.544	0.621	0.648	0.579	0.702	0.624	0.531	0.741	0.764	0.485	0.443	0.563	0.518	0.625	0.597	0.607	0.727	0.609	0.882	0.497	0.533	0.652	0.725	0.763	0.548	0.495	0.466	0.567	0.626
PC 40:7	PC	Positive	M+H	832.585	4.2	PC 15:0/18:1-d7	0.11999	0.31	0.262	0.219	0.28	0.317	0.221	0.27	0.332	0.328	0.291	0.376	0.316	0.275	0.343	0.376	0.258	0.222	0.311	0.328	0.291	0.3	0.388	0.41	0.281	0.433	0.25	0.284	0.376	0.293	0.353	0.25	0.291	0.24	0.275	0.298
PC 40:8	PC	Positive	M+H	830.569	3.93	PC 15:0/18:1-d7	0.0918821	0.165	0.154	0.129	0.166	0.221	0.124	0.197	0.193	0.149	0.243	0.236	0.191	0.158	0.206	0.282	0.183	0.139	0.192	0.18	0.227	0.161	0.208	0.25	0.156	0.277	0.137	0.161	0.233	0.245	0.273	0.159	0.221	0.159	0.185	0.234
PC 42:1	PC	Positive	M+H	872.71	6.94	PC 15:0/18:1-d7	0.120702	0.00133	0.00155	0.0015	0.0015	0.00188	0.0012	0.00152	0.00128	0.00121	0.00151	0.00113	0.00148	0.00107	0.00131	0.00184	0.000893	0.000868	0.00116	0.00123	0.00148	0.00112	0.00152	0.00159	0.00126	0.00218	0.00105	0.00137	0.00135	0.00132	0.00172	0.001	0.00127	0.000996	0.000996	0.00152
PC 42:10	PC	Positive	M+H	854.569	3.81	PC 15:0/18:1-d7	0.0467936	0.0244	0.0219	0.0199	0.0224	0.0319	0.0169	0.0306	0.0339	0.0273	0.0375	0.0372	0.0333	0.0268	0.0333	0.0442	0.0296	0.0194	0.0314	0.0276	0.0359	0.0256	0.0317	0.0393	0.0219	0.0473	0.0225	0.0217	0.0397	0.0326	0.0386	0.025	0.0315	0.0282	0.0263	0.0377
PC 42:2	PC	Positive	M+H	870.695	6.47	PC 15:0/18:1-d7	0.12198	0.000954	0.0011	0.000946	0.000981	0.00104	0.000952	0.00099	0.000801	0.000907	0.00102	0.000944	0.000826	0.000662	0.00096	0.00128	0.000728	0.000576	0.000733	0.000822	0.000873	0.000829	0.000948	0.00119	0.000899	0.00137	0.000786	0.000896	0.000886	0.000912	0.00129	0.000663	0.000872	0.000638	0.000677	0.000869
PC 42:4	PC	Positive	M+H	866.663	5.6	PC 15:0/18:1-d7	0.0970454	0.00154	0.00156	0.00169	0.002	0.00221	0.00163	0.00186	0.00181	0.00164	0.00185	0.00187	0.00182	0.00154	0.00224	0.00226	0.00127	0.00126	0.00147	0.00169	0.00223	0.00151	0.00162	0.00224	0.00195	0.00243	0.00136	0.0016	0.00183	0.00185	0.00269	0.00123	0.00158	0.00102	0.00156	0.00203
PC 42:7	PC	Positive	M+H	860.616	4.62	PC 15:0/18:1-d7	0.116752	0.00677	0.0057	0.00633	0.00625	0.011	0.00449	0.0071	0.00832	0.00749	0.00865	0.00829	0.00802	0.00739	0.00825	0.0113	0.00631	0.00583	0.00739	0.00629	0.00858	0.0065	0.00699	0.0093	0.00711	0.0116	0.00527	0.00597	0.00888	0.00795	0.0106	0.00599	0.00563	0.00692	0.00675	0.00866
PC 42:8	PC	Positive	M+H	858.601	4.23	PC 15:0/18:1-d7	0.103164	0.00318	0.00159	0.00116	0.00399	0.00569	0.00195	0.00548	0.00913	0.00667	0.00762	0.00672	0.00647	0.00522	0.00612	0.0104	0.00617	0.00511	0.00835	0.00865	0.00853	0.0055	0.00834	0.00801	0.00378	0.00985	0.00378	0.00338	0.0101	0.00609	0.0102	0.00498	0.00796	0.00534	0.00697	0.00869
PC 44:10	PC	Positive	M+H	882.601	4.23	PC 15:0/18:1-d7	0.162167	0.000447	0.000422	0.00024	0.000536	0.000509	0.000344	0.00066	0.00112	0.000927	0.000973	0.000807	0.000749	0.00074	0.00111	0.00171	0.000824	0.000771	0.000757	0.000936	0.000992	0.000533	0.000861	0.000956	0.000718	0.00142	0.000471	0.000657	0.00138	0.00095	0.00111	0.000724	0.00122	0.000803	0.000924	0.00125
PC 44:11	PC	Positive	M+H	880.585	3.91	PC 15:0/18:1-d7	0.123136	0.00109	0.000844	0.000596	0.000959	0.00134	0.000957	0.00145	0.00173	0.0011	0.00219	0.00168	0.00145	0.00122	0.00144	0.00216	0.00194	0.00111	0.00153	0.00131	0.00179	0.00133	0.00152	0.00187	0.00112	0.00223	0.000797	0.00118	0.00233	0.00219	0.00233	0.00124	0.00194	0.00149	0.00132	0.00233
PC 44:4	PC	Positive	M+H	894.695	6.35	PC 15:0/18:1-d7	0.142684	0.00151	0.00205	0.00184	0.0019	0.00245	0.00155	0.00227	0.00179	0.00172	0.00247	0.00172	0.00208	0.00169	0.00209	0.00346	0.00136	0.00125	0.00158	0.00182	0.00223	0.00167	0.00228	0.0024	0.00187	0.00332	0.00154	0.00185	0.00203	0.0021	0.00263	0.00129	0.00199	0.00159	0.00158	0.00218
PC 44:5	PC	Positive	M+H	892.679	5.81	PC 15:0/18:1-d7	0.110975	0.00221	0.00236	0.00221	0.00211	0.00296	0.0018	0.0026	0.00208	0.00209	0.00258	0.00231	0.00242	0.00194	0.00293	0.00348	0.00179	0.00182	0.00212	0.00201	0.00276	0.00213	0.0028	0.00303	0.00196	0.0038	0.00199	0.00245	0.00242	0.0025	0.00343	0.00189	0.00247	0.00195	0.00225	0.0024
PC 44:8	PC	Positive	M+H	886.632	4.58	PC O-18:0/18:1-d9	0.154649	0.00172	0.00242	0.00177	0.00228	0.00383	0.00169	0.00223	0.00326	0.00249	0.00322	0.00351	0.00324	0.00247	0.00314	0.00366	0.00262	0.00233	0.00283	0.00259	0.00291	0.00232	0.00263	0.00303	0.0026	0.005	0.00198	0.00251	0.00337	0.0035	0.00384	0.00263	0.00291	0.00235	0.00309	0.00336
PC O-16:0_16:0	PC-O	Positive	M+H	720.59	4.94	PC O-18:0/18:1-d9	0.132003	3.89	5.05	3.68	3.9	3.37	3.96	3.26	2.49	3.34	3.52	3.59	3.19	2.56	3.43	3.33	2.09	2.16	2.23	2.09	2.8	3.99	3.98	2.8	3.57	3.46	2.8	3.58	2.5	3.05	2.93	2.48	2.41	1.92	2.16	2.48
PC O-16:0_18:2	PC-O	Positive	M+H	744.59	5.02	PC O-18:0/18:1-d9	0.0947831	0.792	0.946	0.887	0.89	0.803	0.795	0.852	0.805	0.866	0.877	0.887	0.85	0.734	0.875	0.952	0.57	0.547	0.633	0.613	0.681	0.855	1.12	0.857	0.899	0.913	0.72	0.84	0.817	0.84	0.763	0.6	0.695	0.595	0.625	0.696
PC O-16:1_18:1	PC-O	Positive	M+H	744.59	4.66	PC O-18:0/18:1-d9	0.114923	1.16	1.54	1.33	1.05	1.39	1.06	1.33	1.02	1.03	1.11	1.16	1.13	0.973	0.944	1.16	0.72	0.797	0.795	0.828	0.814	1.05	1.29	0.992	1.16	1.34	0.917	1.24	0.964	0.894	1.17	0.805	0.805	0.725	0.713	0.89
PC O-16:1_18:2	PC-O	Positive	M+H	742.575	4.6	PC O-18:0/18:1-d9	0.123266	0.183	0.189	0.175	0.144	0.237	0.15	0.186	0.186	0.149	0.192	0.205	0.168	0.165	0.147	0.178	0.103	0.122	0.135	0.112	0.153	0.18	0.175	0.0515	0.197	0.226	0.145	0.186	0.168	0.17	0.143	0.147	0.131	0.128	0.121	0.14
PC O-18:1_18:1	PC-O	Positive	M+H	772.621	5.16	PC O-18:0/18:1-d9	0.111142	0.585	0.707	0.563	0.584	0.573	0.511	0.544	0.465	0.485	0.567	0.53	0.537	0.452	0.487	0.599	0.358	0.339	0.35	0.371	0.411	0.542	0.604	0.466	0.486	0.545	0.45	0.608	0.474	0.476	0.487	0.354	0.429	0.332	0.338	0.407
PC O-18:1_18:2	PC-O	Positive	M+H	770.606	4.75	PC O-18:0/18:1-d9	0.0897001	0.616	0.775	0.662	0.701	0.755	0.553	0.709	0.57	0.54	0.706	0.518	0.605	0.593	0.472	0.676	0.326	0.351	0.432	0.401	0.461	0.568	0.686	0.571	0.668	0.631	0.434	0.666	0.579	0.445	0.564	0.403	0.463	0.465	0.408	0.51
PC O-33:1	PC-O	Positive	M+H	732.59	4.59	PC O-18:0/18:1-d9	0.158924	0.0989	0.118	0.0928	0.0911	0.0775	0.1	0.0858	0.0746	0.079	0.087	0.0783	0.077	0.065	0.064	0.0645	0.0619	0.0417	0.0504	0.0507	0.0489	0.0937	0.077	0.0653	0.0724	0.0591	0.0716	0.0673	0.0598	0.0568	0.0499	0.0539	0.0489	0.047	0.045	0.0573
PC O-36:0	PC-O	Positive	M+H	776.653	4.9	PC O-18:0/18:1-d9	0.138784	0.0136	0.0182	0.0148	0.0171	0.0175	0.0129	0.0148	0.0126	0.0158	0.0172	0.0121	0.0133	0.0111	0.0144	0.0184	0.00765	0.00791	0.00977	0.0116	0.0122	0.013	0.0149	0.0124	0.0165	0.0199	0.0112	0.0142	0.0114	0.0119	0.0164	0.00793	0.0102	0.00794	0.0103	0.0108
PC O-36:1	PC-O	Positive	M+H	774.637	5.51	PC O-18:0/18:1-d9	0.144596	0.0866	0.115	0.0914	0.104	0.0976	0.0803	0.0838	0.0686	0.0813	0.0896	0.0688	0.0879	0.0659	0.0797	0.0941	0.0493	0.0568	0.0526	0.057	0.0652	0.075	0.0947	0.0727	0.0825	0.0898	0.0704	0.0897	0.0628	0.0809	0.08	0.0558	0.0631	0.0531	0.0616	0.0671
PC O-38:3	PC-O	Positive	M+H	798.637	4.9	PC O-18:0/18:1-d9	0.134189	0.0198	0.0259	0.023	0.0201	0.0177	0.0141	0.0134	0.0154	0.0173	0.0259	0.0179	0.0191	0.0194	0.0155	0.0234	0.0087	0.00765	0.0155	0.0104	0.0181	0.0184	0.021	0.0208	0.0121	0.0269	0.0135	0.0195	0.0222	0.0132	0.0199	0.0147	0.016	0.0149	0.012	0.0174
PE 32:0	PE	Negative	M-H	690.508	4.82	PE 15:0/18:1-d7	0.104318	0.439	0.566	0.572	0.634	0.498	0.533	0.548	0.419	0.542	0.453	0.493	0.534	0.422	0.527	0.545	0.387	0.294	0.345	0.487	0.368	0.445	0.608	0.579	0.533	0.558	0.508	0.502	0.523	0.57	0.467	0.357	0.343	0.377	0.394	0.386
PE 32:1	PE	Negative	M-H	688.492	4.42	PE 15:0/18:1-d7	0.0832563	0.167	0.181	0.273	0.239	0.203	0.172	0.191	0.211	0.212	0.237	0.18	0.129	0.171	0.181	0.278	0.133	0.101	0.161	0.186	0.152	0.173	0.151	0.221	0.195	0.246	0.19	0.161	0.206	0.257	0.215	0.127	0.12	0.158	0.112	0.163
PE 34:1	PE	Negative	M-H	716.524	4.9	PE 15:0/18:1-d7	0.0877564	5.22	5.43	6.46	6.52	5.32	5.09	5.7	4.83	5.1	5.33	5.18	5.31	4.62	5.01	5.94	4.29	3.37	4.27	4.39	4.1	4.89	5.3	5.81	5.31	6.29	5.48	5.48	5.03	5.62	5.47	4.09	3.49	4.28	3.83	4.6
PE 34:2	PE	Negative	M-H	714.508	4.51	PE 15:0/18:1-d7	0.0774223	3.43	3.23	3.92	4.54	3.75	3.17	3.47	3.4	3.77	4.11	3.27	3.22	2.73	3.37	4.6	2.55	2.02	2.43	3.31	2.98	3.01	3.35	3.78	3.92	5.03	3.47	3.22	3.43	4.01	4.08	2.42	2.3	2.67	2.64	3.11
PE 34:3	PE	Negative	M-H	712.492	4.16	PE 15:0/18:1-d7	0.140744	0.182	0.187	0.274	0.287	0.292	0.205	0.239	0.198	0.225	0.335	0.183	0.177	0.234	0.225	0.298	0.18	0.117	0.207	0.215	0.228	0.146	0.172	0.275	0.238	0.371	0.196	0.144	0.237	0.245	0.298	0.125	0.14	0.204	0.195	0.225
PE 35:2	PE	Negative	M-H	728.524	4.74	PE 15:0/18:1-d7	0.181096	0.0876	0.0968	0.121	0.113	0.121	0.119	0.093	0.0799	0.0942	0.106	0.104	0.0721	0.084	0.0925	0.115	0.0859	0.0507	0.0597	0.0842	0.103	0.0953	0.0981	0.106	0.103	0.122	0.0934	0.0946	0.0851	0.121	0.116	0.062	0.0619	0.0731	0.0729	0.0999
PE 36:2	PE	Negative	M-H	742.539	4.99	PE 15:0/18:1-d7	0.1331	15.2	15.4	18.5	19.3	18.4	14.6	16.3	15	16.8	19.3	14	16.5	13.8	15.9	21.6	12.4	9.79	13	13.9	16	14.8	17.1	17.7	15.3	21.9	14.7	15.4	15.7	17.8	19.7	11	10.9	12.8	11.5	15.3
PE 36:3	PE	Negative	M-H	740.524	4.59	PE 15:0/18:1-d7	0.0657217	5.97	6.3	6.47	7.49	7.39	6.21	6.25	6.52	7.13	7.55	5.82	6.14	5.84	6.37	8.07	4.96	4.1	5.1	5.79	6	5.84	6.82	6.44	6.52	8.74	5.79	5.57	5.73	7.37	7.76	4.52	4.31	5.13	5.19	6.69
PE 36:4	PE	Negative	M-H	738.508	4.43	PE 15:0/18:1-d7	0.0860538	29.3	31.4	35.4	38.8	34.8	28.2	34.7	34.2	34.4	41.2	32.3	29.3	28.4	31.1	42.1	25.3	20.6	25	32.4	27.4	28.9	33.8	36.6	34	44.9	32.3	31.9	36.3	42.1	38.2	21.7	26	26.8	23.7	27.9
PE 36:5	PE	Negative	M-H	736.492	4.1	PE 15:0/18:1-d7	0.145628	1.3	1.28	1.81	1.7	1.29	1.08	1.42	1.72	1.59	1.47	1.32	1.45	1.54	1.64	1.55	1.29	0.936	1.47	1.5	1.11	1.18	1.51	2.15	1.43	1.78	1.35	1.32	1.98	1.65	1.34	1.03	1.17	1.54	1.35	1.29
PE 37:4	PE	Negative	M-H	752.524	4.66	PE 15:0/18:1-d7	0.0571322	1.19	1.16	1.32	1.35	1.5	1.18	1.43	1.32	1.37	1.47	1.37	1.35	1.2	1.2	1.72	1.15	0.775	1.07	1.11	1.26	1.23	1.4	1.45	1.29	1.68	1.29	1.33	1.41	1.37	1.47	0.962	0.961	0.996	1.05	1.24
PE 38:4	PE	Negative	M-H	766.539	4.92	PE 15:0/18:1-d7	0.0648605	113	118	142	142	123	103	131	109	121	135	114	130	107	110	145	93	82.4	94.8	103	103	98.5	128	131	110	161	112	119	119	139	146	94.2	89.1	110	94.8	106
PE 38:6	PE	Negative	M-H	762.508	4.27	PE 15:0/18:1-d7	0.107999	15.1	15	17.1	19.3	14.5	15.9	19.5	15.7	17.2	17.8	14.7	15.9	13.7	14.7	18	13.6	10.6	13.6	14.2	12.7	15.8	17.2	18.6	15.5	18.2	15.2	15.1	16.8	17.6	16.2	10.9	12.1	14.2	12.7	15.2
PE 40:5	PE	Negative	M-H	792.555	4.89	PE 15:0/18:1-d7	0.141614	3.99	4.29	5.31	5.43	4.9	3.67	5.27	5.08	4.77	5.72	4.44	5.24	4.32	4.64	6.33	3.91	3.16	4.2	4.3	4.52	4.02	5.33	5.76	4.41	6.51	4.24	4.93	5.22	5.12	5.56	3.09	3.71	4.28	3.6	4.54
PE 40:6	PE	Negative	M-H	790.539	4.74	PE 15:0/18:1-d7	0.0594832	10.7	12.4	11.7	14.1	13.6	11.6	13.9	12.3	11.9	12.8	13.4	13.2	10.9	11.9	14.7	10.8	7.59	9.27	11.3	10.4	12.5	13.2	13.4	11.6	15.6	12.7	11.7	12.6	14.8	13.8	9.49	9.53	9.62	10.6	11.7
PE 40:7	PE	Negative	M-H	788.524	4.36	PE 15:0/18:1-d7	0.0787406	10.4	8.63	10.2	11.8	9.37	9.56	11.8	11.6	11.4	12	11.3	11.6	9.56	10.8	12.2	10.4	7.4	8.64	10.2	8.74	10	11.2	11.9	10.2	12.8	10	9.94	12	13.6	10.7	8.47	8.31	9.3	8.84	9.55
PE 40:8	PE	Negative	M-H	786.508	4.07	PE 15:0/18:1-d7	0.18782	1.46	1.34	1.46	1.84	1.67	1.17	1.8	1.88	1.85	2	1.83	1.73	1.51	1.72	2.48	1.64	1.16	1.54	1.72	1.68	1.39	1.79	2.13	1.41	2.52	1.47	1.41	2.06	1.99	1.8	1.3	1.36	1.68	1.6	1.81
PE 42:7	PE	Negative	M-H	816.555	4.81	PE 15:0/18:1-d7	0.100213	0.124	0.137	0.119	0.147	0.127	0.103	0.133	0.151	0.116	0.151	0.137	0.143	0.114	0.158	0.164	0.118	0.0906	0.0997	0.14	0.116	0.119	0.157	0.161	0.134	0.156	0.15	0.113	0.158	0.164	0.118	0.0927	0.101	0.127	0.114	0.13
PE 42:8	PE	Negative	M-H	814.539	4.23	PE 15:0/18:1-d7	0.17888	0.0877	0.107	0.0422	0.115	0.0858	0.103	0.185	0.127	0.18	0.266	0.164	0.138	0.0861	0.0724	0.186	0.174	0.111	0.0973	0.206	0.202	0.167	0.102	0.197	0.0918	0.218	0.128	0.0862	0.201	0.22	0.163	0.047	0.159	0.197	0.13	0.199
PE O-16:1_16:0	PE-O	Negative	M-H	674.513	5.15	PE 15:0/18:1-d7	0.205503	0.17	0.159	0.146	0.225	0.149	0.186	0.201	0.164	0.195	0.18	0.185	0.186	0.115	0.196	0.196	0.16	0.107	0.117	0.18	0.145	0.18	0.177	0.17	0.18	0.205	0.195	0.188	0.159	0.204	0.179	0.123	0.137	0.118	0.158	0.135
PE O-16:1_18:1	PE-O	Negative	M-H	700.529	5.26	PE 15:0/18:1-d7	0.153293	6.08	6.09	6.24	7.49	5.92	6.43	7.59	6.59	7.44	7.41	7.07	6.74	5.02	6.59	7.66	6.03	4.34	5.16	6.09	5.18	6.92	7.5	6.97	6.56	7.91	6.86	6.68	6.82	7.87	6.55	4.58	5.46	4.73	5.49	5.8
PE O-16:1_18:2	PE-O	Negative	M-H	698.513	4.8	PE 15:0/18:1-d7	0.0857139	0.88	0.949	0.969	1.1	0.954	0.886	1.11	0.948	0.959	1.06	1.07	1.08	0.821	0.998	1.15	0.944	0.617	0.799	0.882	0.806	0.906	1.1	1.11	0.954	1.13	1.06	0.947	1.15	1.03	0.856	0.696	0.721	0.792	0.776	0.902
PE O-16:1_20:4	PE-O	Negative	M-H	722.513	4.71	PE 15:0/18:1-d7	0.0576174	16.2	19.9	18.8	22.6	20.8	18.1	24.3	22.7	21.4	20.9	22.4	23.4	19.5	20.1	24.4	18.7	13.7	16.8	19.9	17	21.4	22.9	23.8	19.5	25.3	20.7	20.1	22.9	25.6	22.1	15.6	16.9	17.2	19.5	19.2
PE O-16:1_22:6	PE-O	Negative	M-H	746.513	4.54	PE 15:0/18:1-d7	0.038387	11.2	10.3	10.6	13.9	10.6	10.9	12.1	12.9	12.9	13.7	12	13	10.4	11	15.5	11.7	7.91	9.94	12.4	10.5	11.2	12.3	12.9	11.6	14.9	12.7	11.3	12.5	14.4	13	9.63	8.67	10.3	10.2	10.6
PE O-18:1_16:0	PE-O	Negative	M-H	702.544	5.67	PE 15:0/18:1-d7	0.292163	0.209	0.223	0.2	0.291	0.214	0.217	0.253	0.201	0.259	0.258	0.226	0.221	0.172	0.239	0.312	0.187	0.126	0.141	0.219	0.191	0.242	0.268	0.219	0.231	0.295	0.238	0.227	0.207	0.302	0.245	0.167	0.165	0.151	0.186	0.197
PE O-18:1_18:1	PE-O	Negative	M-H	728.56	5.77	PE 15:0/18:1-d7	0.2014	1.7	1.77	1.85	2.37	1.95	1.77	2.12	2.02	2.2	2.2	2.01	2.03	1.52	1.94	2.47	1.71	1.12	1.45	1.89	1.61	1.88	2.18	2.05	1.99	2.54	2	1.9	1.92	2.28	2.07	1.25	1.47	1.47	1.7	1.86
PE O-18:1_18:2	PE-O	Negative	M-H	726.544	5.32	PE 15:0/18:1-d7	0.193816	3.52	3.57	3.93	4.79	3.8	3.49	4.29	4.24	4.26	4.82	3.98	3.89	3.13	4	5.1	3.65	2.42	2.97	3.86	3.51	3.7	4.29	4.59	3.87	5.41	3.87	3.99	4.23	4.66	4.34	2.64	3.16	3.41	3.35	3.83
PE O-18:1_20:4	PE-O	Negative	M-H	750.544	5.24	PE 15:0/18:1-d7	0.15643	23	23.3	25.7	30.4	24.4	21.9	30.8	30.2	30.5	31.8	27.3	27.6	21.8	28	33.7	23.7	17.8	23.1	26	23.6	25.5	30.2	31.7	26.3	35.2	24.2	26.1	30.9	32.7	29	17.2	22.9	21.7	23.5	25.8
PE O-18:1_22:6	PE-O	Negative	M-H	774.544	5.06	PE 15:0/18:1-d7	0.15085	14.6	14.5	13.8	18.4	15.5	13.5	17.6	15.6	17.6	18	15.9	17.8	13.2	15.6	20.2	15.4	10.8	13.1	15.8	14.3	15.6	17.2	16.8	14.4	21.2	14.7	15.2	17.5	18.8	17.6	11.8	12.9	13	13.5	14.8
PE O-18:2_14:0	PE-O	Negative	M-H	672.497	4.74	PE 15:0/18:1-d7	0.115416	0.114	0.0998	0.121	0.132	0.0905	0.122	0.126	0.14	0.107	0.106	0.155	0.111	0.105	0.114	0.124	0.122	0.0548	0.0762	0.11	0.089	0.154	0.116	0.123	0.114	0.135	0.137	0.114	0.133	0.144	0.12	0.0837	0.0764	0.0868	0.116	0.0807
PE O-18:2_18:2	PE-O	Negative	M-H	724.529	4.89	PE 15:0/18:1-d7	0.0760152	1.7	1.93	2.1	2.42	1.97	1.68	2.24	1.97	2.08	2.27	1.95	2.14	1.81	2.06	2.46	1.77	1.36	1.69	1.85	1.75	1.7	2.14	2.3	1.94	2.53	1.9	1.98	2.19	2.33	2.17	1.47	1.51	1.74	1.68	1.88
PE O-18:2_20:4	PE-O	Negative	M-H	748.529	4.81	PE 15:0/18:1-d7	0.0560654	11.2	12.8	12.6	15.7	13.9	11	16	14.8	15	16.1	15.1	16.4	12.9	15.1	18	13.7	9.57	12.3	13.9	12.7	11.9	16.2	17	13.1	17.4	13.3	12.9	17.9	16.5	14	10.6	11.6	13	12.5	14.1
PE O-35:2	PE-O	Negative	M-H	714.544	5.52	PE 15:0/18:1-d7	0.250545	0.152	0.157	0.157	0.191	0.158	0.145	0.19	0.165	0.202	0.182	0.178	0.169	0.126	0.172	0.208	0.153	0.0979	0.121	0.16	0.14	0.159	0.174	0.17	0.163	0.231	0.16	0.163	0.159	0.213	0.175	0.11	0.129	0.133	0.146	0.15
PE O-35:3	PE-O	Negative	M-H	712.529	5.05	PE 15:0/18:1-d7	0.258302	0.0588	0.0587	0.0681	0.0708	0.0714	0.0654	0.0772	0.0706	0.0695	0.0797	0.0659	0.0698	0.0492	0.0625	0.0862	0.0568	0.039	0.0572	0.0619	0.0628	0.0587	0.0737	0.0802	0.0625	0.0937	0.0668	0.068	0.0724	0.0607	0.0746	0.0384	0.053	0.0524	0.0582	0.0588
PE O-36:6	PE-O	Negative	M-H	720.497	4.35	PE 15:0/18:1-d7	0.135834	0.0861	0.0991	0.113	0.12	0.0976	0.062	0.0954	0.153	0.128	0.118	0.123	0.0893	0.136	0.11	0.107	0.0982	0.0714	0.106	0.116	0.0946	0.0888	0.0914	0.139	0.111	0.162	0.1	0.0991	0.147	0.13	0.122	0.0769	0.0651	0.117	0.094	0.104
PE O-38:3	PE-O	Negative	M-H	754.576	5.9	PE 15:0/18:1-d7	0.233994	0.288	0.301	0.352	0.439	0.386	0.284	0.356	0.412	0.41	0.434	0.358	0.34	0.314	0.349	0.523	0.323	0.212	0.309	0.382	0.322	0.329	0.381	0.421	0.379	0.533	0.337	0.323	0.388	0.419	0.451	0.21	0.267	0.321	0.335	0.365
PE O-38:4	PE-O	Negative	M-H	752.56	5.45	PE 15:0/18:1-d7	0.23063	0.989	1.16	1.39	1.92	1.23	1	1.33	1.33	1.62	1.5	1.11	1.23	1.06	1.48	1.58	0.932	0.746	1	1.42	1.09	1.03	1.3	1.54	1.4	1.77	1.03	1.16	1.43	1.63	1.36	0.761	0.952	1.15	1.28	1.24
PE O-40:8	PE-O	Negative	M-H	772.529	4.58	PE 15:0/18:1-d7	0.0791139	11.1	10.1	8.57	12.9	10.8	9.92	12.5	13.1	14.1	13.8	13.8	12.9	10.8	13	14	12.5	8.98	10.1	12.2	10.5	12	13.7	12.4	11.1	14.5	11.7	10.2	13.2	15.3	12.9	9.8	10.7	10.9	12	11.7
PG 32:0	PG	Negative	M-H	721.503	4.07	PG 15:0/18:1-d7	0.180661	0.358	0.464	0.416	0.412	0.469	0.385	0.469	0.388	0.406	0.547	0.325	0.422	0.425	0.373	0.417	0.254	0.249	0.282	0.267	0.348	0.323	0.426	0.394	0.45	0.491	0.308	0.443	0.348	0.37	0.494	0.227	0.305	0.29	0.26	0.35
PG 32:1	PG	Negative	M-H	719.487	3.87	PG 15:0/18:1-d7	0.247195	0.0642	0.0926	0.0971	0.102	0.0972	0.0775	0.0913	0.0879	0.102	0.129	0.0667	0.0893	0.0896	0.0799	0.106	0.0521	0.047	0.0634	0.0665	0.0804	0.0705	0.0907	0.0902	0.102	0.113	0.0616	0.0875	0.106	0.0953	0.123	0.0513	0.0731	0.0657	0.0733	0.0872
PG 34:1	PG	Negative	M-H	747.518	4.52	PG 15:0/18:1-d7	0.256688	3.1	2.81	2.52	3.48	3.04	3.26	3.29	4.21	3.79	4.57	3.69	3.92	3.34	3.26	4.02	3.36	2.44	2.87	3.04	3.34	3.33	3.56	3.31	3.33	3.93	3.51	3.42	3.72	4.04	4.6	3.08	2.74	2.76	2.83	3.02
PG 36:1	PG	Negative	M-H	775.549	5.02	PG 15:0/18:1-d7	0.102627	4.51	4.19	3.48	5.06	4.86	4.29	5.26	5.44	5.6	6.44	5.08	5.73	4.64	5.01	5.87	4.8	3.64	3.94	4.2	4.77	5.34	5.39	4.66	4.63	5.88	4.49	4.77	5.62	5.65	6.58	3.94	4.51	3.79	3.97	4.61
PG 36:2	PG	Negative	M-H	773.534	4.6	PG 15:0/18:1-d7	0.0809569	0.225	0.215	0.218	0.26	0.163	0.205	0.189	0.185	0.23	0.201	0.202	0.2	0.157	0.256	0.174	0.158	0.118	0.131	0.181	0.14	0.203	0.199	0.189	0.236	0.182	0.194	0.21	0.176	0.232	0.18	0.136	0.149	0.116	0.169	0.149
PG 36:3	PG	Negative	M-H	771.518	4.23	PG 15:0/18:1-d7	0.097157	0.275	0.255	0.24	0.35	0.211	0.258	0.295	0.268	0.296	0.288	0.241	0.275	0.23	0.296	0.239	0.226	0.159	0.199	0.227	0.19	0.266	0.295	0.255	0.316	0.263	0.242	0.274	0.267	0.295	0.254	0.182	0.234	0.177	0.204	0.199
PG 38:5	PG	Negative	M-H	795.518	3.76	PG 15:0/18:1-d7	0.079877	0.171	0.157	0.144	0.198	0.164	0.152	0.183	0.209	0.201	0.207	0.19	0.204	0.176	0.191	0.17	0.155	0.118	0.146	0.158	0.144	0.183	0.207	0.202	0.24	0.199	0.168	0.2	0.217	0.226	0.199	0.143	0.177	0.159	0.17	0.165
PG 38:6	PG	Negative	M-H	793.503	3.5	PG 15:0/18:1-d7	0.129846	0.128	0.132	0.115	0.17	0.127	0.112	0.153	0.175	0.16	0.18	0.148	0.184	0.154	0.162	0.161	0.131	0.104	0.11	0.126	0.137	0.13	0.16	0.149	0.136	0.147	0.113	0.137	0.172	0.171	0.158	0.11	0.14	0.122	0.121	0.134
PG 40:6	PG	Negative	M-H	821.534	3.95	PG 15:0/18:1-d7	0.233187	0.392	0.469	0.333	0.444	0.443	0.352	0.457	0.425	0.438	0.593	0.409	0.471	0.353	0.392	0.483	0.35	0.266	0.319	0.334	0.38	0.367	0.487	0.39	0.404	0.513	0.358	0.443	0.433	0.445	0.482	0.284	0.424	0.359	0.354	0.392
PG 40:7	PG	Negative	M-H	819.518	3.65	PG 15:0/18:1-d7	0.1373	0.533	0.475	0.384	0.58	0.495	0.472	0.579	0.67	0.621	0.716	0.549	0.642	0.532	0.579	0.622	0.545	0.384	0.445	0.502	0.49	0.499	0.634	0.541	0.539	0.601	0.453	0.533	0.613	0.656	0.632	0.434	0.513	0.454	0.465	0.522
PI 36:3	PI	Negative	M-H	859.534	3.93	PI 15:0/18:1-d7	0.054766	1.04	0.949	0.973	1.2	1.14	0.975	1.09	1.01	1.11	1.29	1.03	1.07	0.922	1.1	1.25	0.823	0.7	0.736	0.856	0.934	0.93	1.13	0.986	1.15	1.25	0.896	1.02	0.985	1.1	1.19	0.731	0.842	0.723	0.859	0.941
PI 37:4	PI	Negative	M-H	871.534	3.97	PI 15:0/18:1-d7	0.160136	0.304	0.248	0.255	0.255	0.278	0.258	0.249	0.258	0.242	0.283	0.271	0.249	0.227	0.239	0.32	0.205	0.173	0.197	0.18	0.223	0.261	0.264	0.254	0.275	0.278	0.243	0.234	0.232	0.262	0.274	0.197	0.181	0.17	0.182	0.236
PS 34:1	PS	Negative	M-H	760.513	4.17	PS 15:0/18:1-d7	0.1482	7.99	6.34	7.05	7.25	5.98	7.64	6.38	7.05	6.67	7.8	7.05	6.91	6.11	5.33	6.77	4.31	4.35	4.82	4.31	4.74	6.6	6.59	5.52	7.64	6.06	6.07	6.46	5.51	7.29	7.59	4.12	4.27	4.77	4.3	4.95
PS 36:1	PS	Negative	M-H	788.545	4.59	PS 15:0/18:1-d7	0.113522	46.4	50	43	50.7	46.9	46.8	43.1	45.3	44.9	46.1	55.1	53.6	41.9	41.7	47.6	29.9	28.9	31.3	31.1	32.1	44.2	44.9	37.2	51.9	41.8	41.8	45.5	37.9	51.3	52.6	31.5	30	29.1	32.1	32.7
PS 36:2	PS	Negative	M-H	786.529	4.27	PS 15:0/18:1-d7	0.153875	18.7	15.1	15.8	16.8	15.8	16	14.4	17.1	16.9	18.9	18.5	16.9	14.3	14.5	17.3	10	10.2	10.5	11.2	12.1	15.1	14.5	13.5	18.3	16	13.3	14.5	13.1	18.7	19.4	10.1	10.7	10.4	10.3	12
PS 36:4	PS	Negative	M-H	782.498	3.84	PS 15:0/18:1-d7	0.250504	48.2	39.8	38	48.4	43.8	42.3	43.7	45.5	56.4	59.2	58.6	53.3	39.9	42.4	54.5	37	26.9	33.5	36	37.9	43.4	46.7	39.8	49.4	47.3	40.3	41	42.5	54.7	54.6	32.3	35.6	33.5	39.1	34.9
PS 38:1	PS	Negative	M-H	816.576	5.02	PS 15:0/18:1-d7	0.15093	1.68	1.57	1.49	1.79	1.62	1.45	1.39	1.67	1.65	1.92	1.82	1.68	1.43	1.52	1.86	0.929	0.935	1.09	1.07	1.16	1.48	1.53	1.31	1.85	1.6	1.23	1.61	1.33	1.81	1.95	0.97	1.12	1.02	1.11	1.17
PS 38:2	PS	Negative	M-H	814.56	4.71	PS 15:0/18:1-d7	0.114101	0.929	1.12	1.05	1.13	1.17	0.999	0.917	1.08	0.917	1.07	1.2	1	0.905	0.975	1.26	0.598	0.69	0.887	0.715	0.774	0.852	0.917	0.831	1.34	1.19	0.992	1.08	0.891	1.16	1.17	0.673	0.6	0.738	0.612	0.747
PS 38:3	PS	Negative	M-H	812.545	4.39	PS 15:0/18:1-d7	0.1662	6.33	4.85	5.91	6.21	6.67	4.74	4.03	7.13	4.49	7.23	4.79	6.2	5.78	5.42	7.48	3.18	3.23	4.56	3.9	4.9	4.57	4.87	5.49	6.82	6.47	4.55	5.07	4.7	6.23	7.99	3.46	3.23	4.43	3.5	4.85
PS 38:4	PS	Negative	M-H	810.529	4.22	PS 15:0/18:1-d7	0.197435	208	157	171	187	170	175	168	202	187	218	203	206	167	159	200	122	122	133	121	138	167	178	145	201	172	151	177	160	208	226	124	126	135	131	140
PS 40:1	PS	Negative	M-H	844.607	5.64	PS 15:0/18:1-d7	0.240781	0.901	0.99	0.96	1.1	0.819	0.784	0.875	0.974	0.889	0.956	1.05	1.01	0.697	0.819	1.05	0.461	0.535	0.657	0.664	0.678	0.798	0.896	0.675	0.99	0.938	0.78	0.929	0.591	1.04	1.1	0.51	0.684	0.619	0.678	0.72
PS 40:2	PS	Negative	M-H	842.592	5.1	PS 15:0/18:1-d7	0.214027	0.992	0.871	0.78	1.01	0.779	0.825	0.812	0.92	0.901	1.03	1.03	0.899	0.753	0.836	0.909	0.533	0.518	0.627	0.59	0.697	0.763	0.804	0.728	1.03	0.837	0.726	0.833	0.778	1.05	1.01	0.493	0.589	0.588	0.602	0.66
PS 40:4	PS	Negative	M-H	838.56	4.5	PS 15:0/18:1-d7	0.141474	8.75	8.01	6.41	8.43	7.86	7.67	7.17	7.86	9.16	9.43	9.32	9.46	8.69	7.99	8.46	5.69	5.81	5.77	5.58	6.35	7.66	8.82	6.2	9.11	7.69	6.78	8.12	6.68	9.09	11.4	5.31	6.34	5.33	6.03	6.19
PS 40:5	PS	Negative	M-H	836.545	4.36	PS 15:0/18:1-d7	0.153214	6.56	5.8	5.23	6.72	6.17	4.86	5.59	6.7	6.66	7.14	6.92	6.92	5.08	5.45	7.17	3.65	4.36	4	4.14	4.63	5.09	5.64	4.83	6.99	6.48	4.8	5.27	5.43	7.09	7.52	3.73	4.42	4.03	4.08	4.45
PS 40:6	PS	Negative	M-H	834.529	4.06	PS 15:0/18:1-d7	0.210773	27.4	20.5	17.7	26	23.3	23	22.9	21.1	26.9	29.3	29.3	27.2	22.4	23.6	23.8	17.7	15.3	16.9	16.1	18.6	22.6	21.8	17.4	25.6	21.8	18.9	21.8	18.9	28.2	28.2	15.2	16.5	15.5	17.4	17
PS 40:7	PS	Negative	M-H	832.513	3.77	PS 15:0/18:1-d7	0.118918	2.82	1.86	1.69	2.82	2.32	2.23	2.28	2.53	2.97	3.14	3.52	3.07	2.31	2.53	3.02	2.2	1.68	1.88	2.05	2.15	2.33	2.35	2.24	2.88	2.56	2.13	2.03	2.39	3.31	2.9	1.88	2.04	1.93	2.29	2.08
SM 32:1;O2	SM	Positive	M+H	675.544	3.86	SM d18:1/18:1-d9	0.0771753	0.0599	0.0635	0.0682	0.0726	0.072	0.0516	0.0654	0.0552	0.0523	0.0744	0.07	0.0551	0.0552	0.0488	0.0668	0.0413	0.0319	0.0486	0.042	0.0605	0.0465	0.0591	0.0652	0.0572	0.0625	0.0484	0.0525	0.0536	0.0584	0.0545	0.032	0.0381	0.041	0.0435	0.0466
SM 32:2;O2	SM	Positive	M+H	673.528	3.57	SM d18:1/18:1-d9	0.125578	0.00365	0.00477	0.00385	0.00434	0.00391	0.00389	0.00345	0.0036	0.00308	0.00392	0.0038	0.00334	0.00314	0.00236	0.00362	0.00236	0.00198	0.00246	0.00231	0.00359	0.00246	0.00309	0.00321	0.00341	0.00353	0.00234	0.00252	0.00342	0.00286	0.00307	0.00144	0.00163	0.00171	0.00154	0.00237
SM 33:1;O2	SM	Positive	M+H	689.559	4.06	SM d18:1/18:1-d9	0.123092	0.207	0.235	0.194	0.231	0.215	0.216	0.207	0.189	0.194	0.201	0.216	0.226	0.161	0.172	0.238	0.14	0.109	0.118	0.14	0.176	0.168	0.218	0.206	0.207	0.217	0.181	0.196	0.157	0.215	0.187	0.113	0.129	0.116	0.136	0.173
SM 34:0;O2	SM	Positive	M+H	705.591	4.45	SM d18:1/18:1-d9	0.0556953	0.62	0.643	0.539	0.686	0.628	0.678	0.59	0.607	0.589	0.719	0.668	0.562	0.48	0.428	0.61	0.481	0.356	0.351	0.397	0.482	0.514	0.536	0.463	0.64	0.55	0.631	0.546	0.493	0.6	0.474	0.338	0.356	0.375	0.422	0.425
SM 34:1;O2	SM	Positive	M+H	703.575	4.25	SM d18:1/18:1-d9	0.0856733	14.9	15.9	13.3	16.1	14.4	14.9	14.6	12.8	12.4	14.4	14.7	13.2	11.9	10.3	14.3	9.66	8.54	9.57	11.1	12	13.7	15.5	12.6	13.1	13.3	13.4	13.9	11.4	12.8	15.3	9.82	9.14	7.22	9.3	11.7
SM 34:1;O3	SM	Positive	M+H	719.57	4.08	SM d18:1/18:1-d9	0.107285	0.0826	0.0997	0.0736	0.0844	0.0897	0.0738	0.0814	0.0596	0.0714	0.0878	0.0827	0.075	0.0751	0.0622	0.083	0.053	0.0492	0.0427	0.0501	0.0637	0.0727	0.0879	0.0718	0.0743	0.0813	0.0674	0.0813	0.0607	0.075	0.0704	0.0456	0.0515	0.0377	0.0478	0.000517
SM 34:2;O2	SM	Positive	M+H	701.559	3.93	SM d18:1/18:1-d9	0.0834637	4.49	5.24	3.95	4.82	5.4	4.34	4.78	3.72	3.53	5.81	5.09	4.2	3.42	3.35	5.2	3.28	2.5	2.97	3.34	4.13	3.5	4.25	4.1	4.53	4.46	3.16	4.06	3.53	4.95	4.39	2.16	3.08	2.42	2.99	3.42
SM 35:1;O2	SM	Positive	M+H	717.591	4.48	SM d18:1/18:1-d9	0.102879	0.104	0.102	0.107	0.111	0.11	0.107	0.109	0.0938	0.11	0.151	0.106	0.105	0.0833	0.0761	0.1	0.0694	0.0523	0.0593	0.0724	0.0898	0.0921	0.102	0.0741	0.119	0.097	0.102	0.11	0.0862	0.109	0.0847	0.0572	0.0635	0.0649	0.0719	0.0745
SM 36:0;O2	SM	Positive	M+H	733.622	4.92	SM d18:1/18:1-d9	0.161327	0.0635	0.0617	0.0458	0.0658	0.0561	0.0638	0.0517	0.0408	0.0606	0.0661	0.0687	0.047	0.034	0.0475	0.0495	0.0387	0.0307	0.0346	0.0368	0.0466	0.0645	0.0501	0.0405	0.0537	0.0484	0.049	0.0485	0.0395	0.0563	0.0498	0.0323	0.0338	0.0268	0.0422	0.0405
SM 36:1;O2	SM	Positive	M+H	731.606	4.73	SM d18:1/18:1-d9	0.0914665	0.755	0.741	0.648	0.916	0.881	0.717	0.818	0.579	0.687	0.825	0.813	0.67	0.625	0.532	0.78	0.482	0.417	0.444	0.539	0.601	0.717	0.761	0.663	0.922	0.786	0.664	0.728	0.616	0.712	0.641	0.424	0.502	0.479	0.58	0.617
SM 36:2;O2	SM	Positive	M+H	729.591	4.36	SM d18:1/18:1-d9	0.0412678	0.142	0.133	0.121	0.148	0.121	0.138	0.136	0.106	0.14	0.143	0.139	0.122	0.101	0.129	0.142	0.0979	0.0843	0.0869	0.1	0.0965	0.125	0.112	0.106	0.13	0.133	0.118	0.114	0.0985	0.129	0.116	0.0768	0.0822	0.0643	0.0921	0.0844
SM 37:1;O2	SM	Positive	M+H	745.622	5.03	SM d18:1/18:1-d9	0.169152	0.0645	0.065	0.0563	0.0686	0.0702	0.0678	0.0631	0.0546	0.0626	0.0821	0.0747	0.0623	0.0509	0.0557	0.078	0.0458	0.0381	0.0446	0.0403	0.0702	0.0632	0.0717	0.0607	0.0688	0.0786	0.0602	0.0624	0.0549	0.0687	0.0635	0.0388	0.0443	0.0432	0.0451	0.057
SM 38:0;O2	SM	Positive	M+H	761.653	5.51	SM d18:1/18:1-d9	0.117251	0.0329	0.0293	0.0282	0.0368	0.0329	0.0313	0.0296	0.024	0.0294	0.0323	0.035	0.0279	0.0225	0.0262	0.0295	0.022	0.0169	0.0178	0.0209	0.0284	0.0284	0.0275	0.0272	0.032	0.0319	0.0309	0.0298	0.0244	0.0355	0.029	0.0193	0.02	0.0189	0.0246	0.0262
SM 38:1;O2	SM	Positive	M+H	759.637	5.32	SM d18:1/18:1-d9	0.12339	1.09	1.2	1.01	1.2	1.16	0.924	1.1	0.911	1.04	1.38	1.1	1.04	0.89	0.867	1.28	0.742	0.546	0.75	0.839	0.981	0.927	1.06	1.02	1.09	1.13	1.03	1.04	0.985	1.11	1.05	0.639	0.765	0.712	0.815	1.03
SM 38:2;O2	SM	Positive	M+H	757.622	4.86	SM d18:1/18:1-d9	0.0904554	0.209	0.21	0.173	0.233	0.207	0.217	0.188	0.164	0.182	0.244	0.223	0.187	0.145	0.148	0.207	0.153	0.101	0.128	0.127	0.185	0.171	0.168	0.155	0.202	0.193	0.175	0.167	0.147	0.177	0.183	0.109	0.12	0.123	0.135	0.164
SM 39:1;O2	SM	Positive	M+H	773.653	5.6	SM d18:1/18:1-d9	0.0684065	0.132	0.136	0.116	0.144	0.137	0.124	0.131	0.106	0.119	0.144	0.138	0.119	0.0999	0.103	0.131	0.0887	0.0747	0.0826	0.0839	0.114	0.109	0.115	0.122	0.133	0.132	0.124	0.127	0.103	0.143	0.124	0.0763	0.0933	0.087	0.0997	0.108
SM 39:2;O2	SM	Positive	M+H	771.637	5.12	SM d18:1/18:1-d9	0.125741	0.0151	0.0145	0.0109	0.0145	0.0152	0.0144	0.0151	0.0104	0.013	0.0167	0.0178	0.0143	0.0104	0.0123	0.017	0.0105	0.00752	0.00878	0.0103	0.0141	0.0139	0.0137	0.013	0.0147	0.016	0.0143	0.0127	0.0126	0.0157	0.0139	0.00958	0.0116	0.00844	0.00956	0.0127
SM 40:0;O2	SM	Positive	M+H	789.684	6.03	SM d18:1/18:1-d9	0.0797276	0.134	0.137	0.124	0.151	0.143	0.129	0.135	0.106	0.141	0.168	0.144	0.12	0.0984	0.114	0.143	0.0912	0.071	0.0791	0.0994	0.127	0.115	0.131	0.123	0.148	0.153	0.129	0.127	0.109	0.145	0.128	0.082	0.0939	0.0882	0.108	0.115
SM 40:1;O2	SM	Positive	M+H	787.669	5.82	SM d18:1/18:1-d9	0.093419	3.73	4.34	3.86	4.31	4.52	3.64	4.06	3.02	3.72	4.44	4.05	3.57	3.07	3.39	4.12	2.53	2.34	2.68	2.59	3.63	3.74	3.76	3.81	4.34	4.49	4.11	4.37	3.45	4.27	4.37	2.65	2.94	2.95	3.34	3.39
SM 40:2;O2	SM	Positive	M+H	785.653	5.37	SM d18:1/18:1-d9	0.0891986	1.46	1.38	1.22	1.46	1.48	1.24	1.33	1.08	1.33	1.71	1.54	1.32	1.02	1.03	1.44	0.999	0.705	0.844	0.907	1.29	1.16	1.34	1.21	1.39	1.45	1.23	1.36	1.16	1.37	1.3	0.891	1.05	0.873	1.02	1.19
SM 40:3;O2	SM	Positive	M+H	783.637	4.86	SM d18:1/18:1-d9	0.136981	0.0389	0.0383	0.035	0.0425	0.0369	0.0391	0.0348	0.0342	0.0336	0.0416	0.0422	0.0368	0.0303	0.0288	0.0376	0.0286	0.0212	0.029	0.026	0.0335	0.0341	0.0333	0.0309	0.0365	0.0331	0.0339	0.033	0.0315	0.0346	0.0322	0.021	0.0277	0.027	0.0291	0.0277
SM 41:0;O2	SM	Positive	M+H	803.7	6.34	SM d18:1/18:1-d9	0.0929607	0.0176	0.0181	0.015	0.0211	0.016	0.0174	0.0161	0.0127	0.0179	0.0199	0.0186	0.0167	0.0129	0.0134	0.0195	0.0121	0.00848	0.00868	0.0133	0.0153	0.0156	0.015	0.015	0.0214	0.0183	0.0163	0.016	0.013	0.0179	0.0163	0.0116	0.0126	0.0109	0.013	0.0153
SM 41:1;O2	SM	Positive	M+H	801.684	6.12	SM d18:1/18:1-d9	0.103653	0.767	0.817	0.658	0.907	0.856	0.751	0.755	0.568	0.71	0.862	0.823	0.714	0.563	0.61	0.809	0.524	0.423	0.477	0.536	0.67	0.661	0.78	0.711	0.863	0.844	0.703	0.742	0.639	0.832	0.773	0.487	0.596	0.509	0.618	0.706
SM 41:2;O2	SM	Positive	M+H	799.669	5.67	SM d18:1/18:1-d9	0.093371	0.3	0.33	0.254	0.376	0.344	0.29	0.312	0.224	0.276	0.361	0.321	0.305	0.253	0.265	0.329	0.206	0.175	0.186	0.2	0.299	0.29	0.299	0.273	0.342	0.325	0.305	0.306	0.261	0.339	0.293	0.184	0.227	0.213	0.243	0.257
SM 42:0;O2	SM	Positive	M+H	817.716	6.65	SM d18:1/18:1-d9	0.10076	0.0601	0.0722	0.0587	0.0721	0.066	0.0588	0.0649	0.0493	0.06	0.0734	0.0624	0.0557	0.0486	0.053	0.0696	0.0405	0.0331	0.0375	0.0427	0.0549	0.0563	0.0645	0.055	0.0726	0.0762	0.0597	0.0694	0.0521	0.0679	0.0639	0.0399	0.0482	0.0413	0.0517	0.0532
SM 42:0;O3	SM	Positive	M+H	833.711	6.16	SM d18:1/18:1-d9	0.0835178	0.0835	0.101	0.0782	0.108	0.101	0.083	0.0987	0.0717	0.0828	0.102	0.0914	0.0894	0.0688	0.0725	0.0946	0.0629	0.0537	0.0554	0.0585	0.0763	0.0801	0.0999	0.0849	0.11	0.104	0.086	0.101	0.0765	0.0949	0.0919	0.0542	0.0811	0.0625	0.0761	0.0843
SM 42:1;O2	SM	Positive	M+H	815.7	6.43	SM d18:1/18:1-d9	0.105359	3.94	4.73	4.22	4.86	4.64	3.89	4.67	3.9	4.21	5.48	4.22	4.07	3.88	3.58	5.4	2.75	2.17	2.71	3.33	4.08	4.07	4.43	4.3	4.74	5.01	3.9	4.45	3.72	5.03	4.37	2.73	3.37	3.38	3.35	3.66
SM 42:2;O2	SM	Positive	M+H	813.684	5.84	SM d18:1/18:1-d9	0.096413	4.11	4.58	4.14	4.72	4.88	4.03	4.43	3.25	4.09	4.93	4.47	3.88	3.3	3.75	4.57	2.88	2.58	2.93	2.88	3.96	4.22	4.1	4.16	4.76	4.88	4.56	4.75	3.75	4.69	4.79	2.89	3.21	3.23	3.73	3.65
SM 42:3;O2	SM	Positive	M+H	811.669	5.37	SM d18:1/18:1-d9	0.0881995	2.05	1.91	1.75	2.05	2.09	1.73	1.88	1.53	1.87	2.49	2.17	1.88	1.52	1.45	2.15	1.43	1.02	1.26	1.29	1.85	1.64	1.89	1.76	1.92	2.12	1.76	1.9	1.7	1.9	1.85	1.25	1.51	1.29	1.43	1.71
SM 42:4;O2	SM	Positive	M+H	809.653	4.92	SM d18:1/18:1-d9	0.138593	0.11	0.122	0.117	0.121	0.127	0.111	0.113	0.112	0.111	0.154	0.125	0.108	0.0929	0.0889	0.132	0.0756	0.0673	0.0901	0.0695	0.128	0.112	0.107	0.111	0.11	0.128	0.0843	0.102	0.105	0.113	0.118	0.059	0.0778	0.0806	0.0851	0.106
SM 43:1;O2	SM	Positive	M+H	829.716	6.64	SM d18:1/18:1-d9	0.0604145	0.0442	0.0526	0.0426	0.0504	0.0541	0.0396	0.0465	0.0371	0.0439	0.0531	0.0471	0.0436	0.0357	0.0358	0.0503	0.0288	0.0241	0.0279	0.0305	0.0395	0.0402	0.045	0.0415	0.0471	0.0526	0.0426	0.0492	0.0386	0.0482	0.0465	0.0281	0.0341	0.03	0.0345	0.0391
SM 43:2;O2	SM	Positive	M+H	827.7	6.05	SM d18:1/18:1-d9	0.101986	0.0219	0.0215	0.02	0.0253	0.0232	0.0223	0.0227	0.0184	0.0217	0.0267	0.0236	0.0192	0.016	0.0167	0.0217	0.0161	0.0114	0.0138	0.016	0.0201	0.0202	0.0208	0.0205	0.0247	0.0234	0.0206	0.0202	0.0176	0.000138	0.0211	0.0141	0.0166	0.0148	0.0175	0.0201
SM 43:3;O2	SM	Positive	M+H	825.684	5.65	SM d18:1/18:1-d9	0.0914365	0.00659	0.00645	0.00472	0.00768	0.00649	0.00479	0.00675	0.00484	0.00567	0.0083	0.00602	0.00662	0.00554	0.00564	0.00668	0.0047	0.00354	0.00536	0.00414	0.0065	0.00593	0.00607	0.00615	0.00678	0.00739	0.00552	0.00629	0.00594	0.00657	0.00636	0.00476	0.0055	0.00421	0.00491	0.0048
SM 44:1;O2	SM	Positive	M+H	843.731	7.03	SM d18:1/18:1-d9	0.0918339	0.0237	0.0275	0.0247	0.029	0.0274	0.0229	0.0247	0.0216	0.0233	0.0293	0.0258	0.025	0.0195	0.0192	0.0278	0.0149	0.013	0.0188	0.0169	0.0235	0.0211	0.0258	0.0243	0.027	0.0298	0.0224	0.0256	0.024	0.0272	0.0247	0.0156	0.0185	0.0186	0.0186	0.023
SM 44:2;O2	SM	Positive	M+H	841.716	6.38	SM d18:1/18:1-d9	0.105461	0.0151	0.0178	0.0149	0.0189	0.0175	0.0168	0.0158	0.0135	0.0149	0.0202	0.0166	0.016	0.0135	0.014	0.0208	0.011	0.00943	0.00996	0.0126	0.015	0.0137	0.0173	0.0171	0.0187	0.0191	0.0162	0.0178	0.0149	0.0189	0.0182	0.0112	0.0141	0.0134	0.0122	0.0163
SM 44:3;O2	SM	Positive	M+H	839.7	5.92	SM d18:1/18:1-d9	0.115801	0.00787	0.00942	0.00702	0.00936	0.0095	0.00625	0.00806	0.00806	0.0105	0.0117	0.00969	0.00923	0.0078	0.00717	0.00855	0.00605	0.00476	0.00686	0.00611	0.00802	0.00887	0.00874	0.00992	0.0104	0.0082	0.00806	0.00796	0.00958	0.0102	0.00818	0.00598	0.00762	0.00608	0.00805	0.00825
TG 34:0	TG	Positive	M+NH4	628.551	6.23	TG 14:0/16:1/14:0-d5	0.0840809	0.0163	0.0194	0.0194	0.0336	0.0254	0.0186	0.0193	0.0175	0.0292	0.0278	0.0187	0.017	0.0168	0.0285	0.0229	0.0178	0.0116	0.014	0.0222	0.0193	0.0169	0.0189	0.0199	0.0326	0.0257	0.0175	0.0188	0.0199	0.0306	0.0246	0.0141	0.0156	0.018	0.022	0.0201
TG 36:1	TG	Positive	M+NH4	654.567	6.33	TG 14:0/16:1/14:0-d5	0.0777707	0.0955	0.0891	0.115	0.164	0.124	0.0972	0.0817	0.101	0.143	0.137	0.0953	0.0748	0.0955	0.142	0.115	0.0925	0.0457	0.0812	0.111	0.0987	0.0932	0.0866	0.108	0.169	0.134	0.109	0.0947	0.111	0.157	0.124	0.0743	0.0674	0.0905	0.102	0.094
TG 42:0	TG	Positive	M+NH4	740.676	8.34	TG 14:0/16:1/14:0-d5	0.101234	0.0239	0.0207	0.0244	0.0341	0.022	0.025	0.0208	0.0223	0.0294	0.023	0.0234	0.018	0.0195	0.0325	0.0202	0.0172	0.0116	0.0166	0.0251	0.016	0.0229	0.0202	0.023	0.0338	0.0196	0.0234	0.0201	0.0209	0.031	0.0221	0.019	0.0186	0.0184	0.0219	0.0177
TG 42:1	TG	Positive	M+NH4	738.661	7.93	TG 14:0/16:1/14:0-d5	0.147157	0.097	0.0767	0.0938	0.147	0.103	0.0949	0.0763	0.0862	0.142	0.114	0.0997	0.0731	0.0762	0.137	0.0953	0.0922	0.0478	0.0686	0.102	0.0842	0.0952	0.0755	0.0898	0.156	0.109	0.101	0.0847	0.0909	0.146	0.0954	0.0737	0.0653	0.0831	0.104	0.0834
TG 42:2	TG	Positive	M+NH4	736.645	7.49	TG 14:0/16:1/14:0-d5	0.0949658	0.156	0.141	0.191	0.267	0.17	0.175	0.13	0.16	0.252	0.179	0.182	0.117	0.139	0.277	0.164	0.152	0.0804	0.145	0.176	0.137	0.176	0.133	0.189	0.28	0.172	0.183	0.149	0.187	0.265	0.164	0.131	0.0934	0.163	0.172	0.137
TG 44:0	TG	Positive	M+NH4	768.708	8.77	TG 14:0/16:1/14:0-d5	0.120965	0.0886	0.0876	0.0919	0.123	0.0821	0.0897	0.0744	0.082	0.104	0.0808	0.0901	0.0761	0.0726	0.124	0.0645	0.0493	0.0472	0.0682	0.0902	0.0608	0.0885	0.0774	0.0842	0.124	0.0656	0.0955	0.081	0.0864	0.103	0.0786	0.0698	0.0704	0.0712	0.0816	0.057
TG 44:1	TG	Positive	M+NH4	766.692	8.4	TG 14:0/16:1/14:0-d5	0.0297733	0.279	0.166	0.184	0.351	0.174	0.27	0.143	0.189	0.298	0.161	0.282	0.147	0.159	0.293	0.146	0.22	0.0907	0.135	0.242	0.113	0.264	0.161	0.203	0.343	0.168	0.285	0.15	0.175	0.328	0.164	0.189	0.137	0.15	0.228	0.127
TG 44:2	TG	Positive	M+NH4	764.676	7.99	TG 14:0/16:1/14:0-d5	0.115634	0.201	0.131	0.154	0.257	0.129	0.193	0.138	0.146	0.247	0.158	0.209	0.125	0.125	0.235	0.126	0.197	0.0791	0.116	0.178	0.111	0.202	0.132	0.15	0.276	0.154	0.216	0.142	0.147	0.257	0.127	0.16	0.116	0.142	0.178	0.116
TG 44:3	TG	Positive	M+NH4	762.661	7.57	TG 14:0/16:1/14:0-d5	0.0795149	0.0605	0.0414	0.047	0.0756	0.04	0.0575	0.038	0.0443	0.0703	0.0429	0.062	0.039	0.0347	0.0782	0.039	0.058	0.0238	0.0342	0.055	0.0309	0.055	0.0393	0.0475	0.0787	0.0395	0.0647	0.0445	0.0478	0.0768	0.0382	0.0447	0.0296	0.0416	0.0535	0.0321
TG 45:1	TG	Positive	M+NH4	780.708	8.62	TG 14:0/16:1/14:0-d5	0.150684	0.0322	0.0186	0.0181	0.0349	0.0126	0.0332	0.0145	0.0157	0.0361	0.0168	0.0297	0.0144	0.0153	0.0395	0.0126	0.0432	0.0109	0.0169	0.0306	0.0125	0.0238	0.0197	0.0184	0.0356	0.0151	0.0315	0.0178	0.0194	0.0365	0.0139	0.0263	0.0294	0.0159	0.0231	0.0146
TG 46:0	TG	Positive	M+NH4	796.739	9.16	TG 15:0/18:1-d7/15:0	0.172936	0.369	0.392	0.441	0.51	0.44	0.312	0.341	0.405	0.434	0.352	0.26	0.376	0.367	0.515	0.325	0.0983	0.246	0.325	0.337	0.302	0.285	0.363	0.419	0.654	0.384	0.301	0.279	0.362	0.364	0.487	0.251	0.28	0.317	0.329	0.279
TG 46:1	TG	Positive	M+NH4	794.723	8.82	TG 15:0/18:1-d7/15:0	0.123881	3.25	1.35	1.78	3.89	1.54	4.3	1.23	1.69	3.43	1.33	3.15	1.62	1.58	3.14	1.14	2.47	0.62	1.35	2.53	1.14	2.56	1.53	2.13	2.84	1.54	2.91	1.28	2.01	3.28	1.32	2.62	1.21	1.74	2.56	1.14
TG 46:2	TG	Positive	M+NH4	792.708	8.44	TG 14:0/16:1/14:0-d5	0.0953649	1.11	0.575	0.648	1.22	0.536	1.09	0.498	0.682	1.05	0.54	1.18	0.549	0.55	1.05	0.449	0.915	0.342	0.483	0.896	0.35	1.05	0.599	0.693	1.28	0.515	1.15	0.559	0.633	1.26	0.521	0.77	0.462	0.54	0.798	0.39
TG 46:3	TG	Positive	M+NH4	790.692	8.04	TG 14:0/16:1/14:0-d5	0.15289	0.312	0.163	0.192	0.318	0.141	0.287	0.18	0.188	0.317	0.177	0.319	0.168	0.154	0.306	0.142	0.288	0.0982	0.145	0.243	0.124	0.31	0.18	0.197	0.358	0.169	0.312	0.178	0.189	0.359	0.138	0.243	0.148	0.181	0.237	0.131
TG 47:1	TG	Positive	M+NH4	808.739	9.01	TG 15:0/18:1-d7/15:0	0.124001	0.256	0.115	0.15	0.255	0.116	0.322	0.126	0.114	0.243	0.1	0.264	0.11	0.114	0.247	0.1	0.253	0.0696	0.103	0.207	0.0715	0.215	0.113	0.16	0.239	0.125	0.261	0.112	0.164	0.258	0.115	0.216	0.147	0.143	0.209	0.101
TG 47:2	TG	Positive	M+NH4	806.723	8.66	TG 14:0/16:1/14:0-d5	0.0921579	0.134	0.0639	0.0665	0.144	0.0454	0.12	0.0588	0.0564	0.125	0.0524	0.116	0.0483	0.0609	0.132	0.0422	0.124	0.0358	0.0526	0.103	0.0374	0.108	0.0539	0.0662	0.134	0.0493	0.129	0.0615	0.066	0.13	0.0429	0.0942	0.0652	0.0562	0.091	0.0443
TG 48:1	TG	Positive	M+NH4	822.755	9.2	TG 15:0/18:1-d7/15:0	0.0669873	11.9	6.08	8.55	12.4	6.09	11.6	6.21	7.19	11.5	5.86	11.4	6.32	6.77	11.1	5.74	7.23	3.52	5.58	9.11	4.5	10.4	6.39	7.53	12.3	6.28	11	6.3	7.07	12.3	5.99	9.14	4.84	5.75	8.62	4.62
TG 48:2	TG	Positive	M+NH4	820.739	8.86	TG 15:0/18:1-d7/15:0	0.0941066	15	6.1	8.09	16.6	6.39	18.5	5.79	7.19	14.1	5.78	14.2	7.11	6.21	12.3	5.16	12.2	3.07	5.44	10.9	4.4	11.1	6.78	9.4	12.6	6.29	13.9	5.28	8.27	14.4	6.1	10.4	5.05	7.37	10.7	4.6
TG 48:3	TG	Positive	M+NH4	818.723	8.48	TG 14:0/16:1/14:0-d5	0.0944144	2.54	1.17	1.5	2.5	1.02	2.49	1.09	1.46	2.24	1.1	2.54	1.18	1.22	2.41	0.935	2.14	0.743	1.13	2.15	0.701	2.52	1.26	1.4	2.87	1.02	2.6	1.27	1.47	2.7	0.984	1.8	0.947	1.15	1.82	0.776
TG 48:4	TG	Positive	M+NH4	816.708	8.09	TG 14:0/16:1/14:0-d5	0.159043	0.372	0.178	0.203	0.358	0.132	0.337	0.187	0.205	0.336	0.167	0.384	0.179	0.172	0.335	0.138	0.315	0.103	0.155	0.292	0.124	0.368	0.189	0.207	0.367	0.157	0.353	0.187	0.207	0.391	0.141	0.268	0.145	0.181	0.258	0.122
TG 49:1	TG	Positive	M+NH4	836.77	9.39	TG 15:0/18:1-d7/15:0	0.121787	1.1	0.532	0.712	1.26	0.585	1.53	0.498	0.621	0.928	0.419	1.05	0.592	0.59	1.2	0.44	0.726	0.282	0.479	0.869	0.385	0.947	0.53	0.789	1.14	0.653	0.973	0.473	0.725	1.07	0.57	0.987	0.48	0.572	0.916	0.407
TG 49:2	TG	Positive	M+NH4	834.755	9.05	TG 15:0/18:1-d7/15:0	0.121681	2.03	0.724	0.912	1.73	0.65	2.51	0.717	0.786	1.71	0.596	1.86	0.713	0.752	1.74	0.572	1.5	0.364	0.634	1.28	0.445	1.81	0.674	0.98	1.78	0.759	1.75	0.71	0.94	1.72	0.658	1.33	0.621	0.83	1.49	0.52
TG 49:3	TG	Positive	M+NH4	832.739	8.7	TG 14:0/16:1/14:0-d5	0.0734713	0.351	0.146	0.161	0.354	0.113	0.334	0.149	0.152	0.296	0.114	0.343	0.122	0.144	0.308	0.0993	0.274	0.0849	0.126	0.245	0.0812	0.321	0.136	0.164	0.346	0.114	0.379	0.152	0.172	0.335	0.105	0.249	0.114	0.133	0.232	0.0903
TG 50:1	TG	Positive	M+NH4	850.786	9.57	TG 15:0/18:1-d7/15:0	0.138525	26.8	14.5	20.1	30	18.1	28.1	14.8	19.4	25	14.3	24.8	16.3	16.9	24.9	12.3	12.4	8.73	13.5	17.6	11.5	20.8	17.4	18.7	24.5	17.5	22.4	14.1	17.3	26.8	17.2	20.9	12.7	15.3	18.1	11.4
TG 50:2	TG	Positive	M+NH4	848.77	9.25	TG 15:0/18:1-d7/15:0	0.143747	46.2	20.3	31.9	42.2	23	49.8	23.2	24.2	35.7	19.4	39.6	24.1	23.4	38.3	17.7	30.3	12.5	21	36.2	16.2	35.9	24.4	28.3	39.3	24.3	47.1	22.9	26.4	44.1	20.4	36.4	19.7	23.8	32.6	17.9
TG 50:3	TG	Positive	M+NH4	846.755	8.9	TG 15:0/18:1-d7/15:0	0.108733	33.1	13.9	19.9	35.1	15.5	44.5	13.4	15.5	27.7	12.9	33.8	17.3	14.6	27	12.1	28.2	8.22	12.5	24.9	9.39	27.8	14.6	20.4	25.7	15.1	32.2	13.2	19.7	34.8	15.3	24.8	12.3	14.8	26	11.4
TG 50:4	TG	Positive	M+NH4	844.739	8.54	TG 14:0/16:1/14:0-d5	0.0742014	4.54	2.06	2.67	4.56	1.64	4.64	2.03	2.42	4.39	1.81	4.55	2.11	2.15	4.45	1.59	3.54	1.36	1.96	3.85	1.29	4.31	2.06	2.56	5.45	1.78	4.92	2.26	2.83	4.91	1.57	3.31	1.59	1.91	3.58	1.28
TG 51:1	TG	Positive	M+NH4	864.801	9.74	TG 15:0/18:1-d7/15:0	0.105234	1.12	0.674	0.834	1.22	0.821	1.45	0.717	0.704	1.09	0.61	1.22	0.753	0.567	1.19	0.629	0.63	0.371	0.529	0.995	0.533	1.11	0.672	0.86	1.17	0.71	1.08	0.545	0.752	1.22	0.598	1.02	0.634	0.67	1.05	0.511
TG 51:2	TG	Positive	M+NH4	862.786	9.45	TG 15:0/18:1-d7/15:0	0.102618	5.42	2.09	3.08	5.22	2.14	7.12	2.38	2.46	5.11	1.74	5.43	2.46	2.18	5.36	1.77	4.46	1.15	1.92	4.3	1.54	4.85	2.42	3.34	5.07	2.58	5.78	2.01	3	5.37	2.03	5.09	1.77	2.51	4.31	1.6
TG 51:3	TG	Positive	M+NH4	860.77	9.11	TG 15:0/18:1-d7/15:0	0.148686	5.12	1.46	1.96	4	1.32	5.87	1.5	1.79	4.32	1.15	4.3	1.57	1.6	3.78	1.08	3.67	0.708	1.38	2.87	0.872	3.95	1.5	2.16	3.91	1.52	4.22	1.37	1.99	4.18	1.27	3.38	1.23	1.87	3.32	0.927
TG 51:4	TG	Positive	M+NH4	858.755	8.75	TG 14:0/16:1/14:0-d5	0.173866	1.02	0.313	0.43	0.995	0.308	1.33	0.326	0.38	0.928	0.259	1.08	0.382	0.313	0.94	0.239	0.853	0.153	0.306	0.699	0.207	0.928	0.347	0.501	0.79	0.291	1.11	0.305	0.483	0.961	0.278	0.855	0.3	0.349	0.748	0.221
TG 52:1	TG	Positive	M+NH4	878.817	9.91	TG 20:0/20:1/20:0-d5	0.0847382	9.41	6.45	7.12	11.9	10.5	11.3	7.71	6.67	10.4	6.68	10.2	7.96	5.67	10.6	6.96	3.86	4.28	6.54	8.89	6.29	7.14	6.49	8.55	11.8	8.42	8.21	6.85	7.5	10.5	8.3	7.66	5.72	5.8	7.84	5.74
TG 52:2	TG	Positive	M+NH4	876.801	9.61	TG 15:0/18:1-d7/15:0	0.139418	77.8	36.9	48.9	71	41.8	90.1	41.5	47.8	70.6	33.5	81.8	38.7	35.9	61.9	31.2	63.6	21.4	34.4	50.3	26.4	68.8	36.5	45.6	57.4	38.5	75	35.9	43.7	74.8	35.4	70.8	34.6	35.2	54.2	27.2
TG 52:3	TG	Positive	M+NH4	874.786	9.29	TG 15:0/18:1-d7/15:0	0.177604	86.3	37.5	61.9	85.1	47.2	99.7	41.3	47.4	70.6	35.9	81.7	50.4	42.1	76.4	31.9	65.4	23.3	37.8	68.7	34.1	75.8	47.8	59.3	77.1	42.7	85.1	42.8	58.3	78.6	38.7	68.3	38.2	46.2	73.8	36.4
TG 52:4	TG	Positive	M+NH4	872.77	8.95	TG 15:0/18:1-d7/15:0	0.138404	47.6	22.3	29.3	52	24.4	71.6	25.4	24.7	45.5	20.3	56.1	27.6	24.9	41.6	17.8	45.9	13.7	20.7	38.8	15.4	41.2	23.1	33.5	40.6	25.8	56.1	23.9	32.8	51.8	23.7	41.5	22.5	22.1	43	19.4
TG 52:5	TG	Positive	M+NH4	870.755	8.6	TG 14:0/16:1/14:0-d5	0.0785114	6.67	3.17	3.68	6.69	2.4	6.68	3.12	3.57	6.86	2.44	6.47	3.05	3.4	6.25	2.29	4.92	1.89	2.95	5.34	1.75	5.68	2.93	3.91	6.98	2.69	6.94	3.58	4.18	7.25	2.38	5.06	2.56	2.76	4.88	2.01
TG 53:1	TG	Positive	M+NH4	892.833	10.06	TG 20:0/20:1/20:0-d5	0.123642	1.55	0.627	0.694	1.38	0.645	1.64	0.568	0.572	1.57	0.555	1.57	0.731	0.546	1.19	0.6	2.65	0.338	0.5	1.29	0.405	1.53	0.545	0.609	1.05	0.546	1.52	0.685	0.619	1.69	0.534	1.29	0.534	0.585	1.28	0.483
TG 53:2	TG	Positive	M+NH4	890.817	9.77	TG 20:0/20:1/20:0-d5	0.124444	15.6	4.18	4.67	11.5	3.67	17.8	3.88	4	13.2	3.51	15.8	3.94	3.56	9.44	3.58	48.8	2.03	3.56	9.76	2.44	14.3	3.71	4.85	7.74	3.34	13.4	3.83	4.93	14.5	2.69	11.4	3.77	4.07	10.9	2.98
TG 53:3	TG	Positive	M+NH4	888.801	9.47	TG 15:0/18:1-d7/15:0	0.114449	7.63	2.76	3.98	6.66	2.62	9.42	3.23	3.09	7.41	2.12	7.32	3.15	2.49	6.74	2.03	5.03	1.36	2.47	5.4	1.77	5.98	3	4.22	6.4	2.82	7.53	2.84	3.56	6.57	2.5	6.31	2.31	3.03	5.02	1.87
TG 53:4	TG	Positive	M+NH4	886.786	9.1	TG 15:0/18:1-d7/15:0	0.134593	3.61	1.11	1.48	2.85	0.919	3.63	1.15	1.34	3.03	0.877	2.88	1.15	1.17	2.61	0.791	2.58	0.598	0.997	2.02	0.685	2.91	1.16	1.5	2.84	1.07	3	0.947	1.46	2.87	0.923	2.27	0.92	1.19	2.38	0.702
TG 53:5	TG	Positive	M+NH4	884.77	8.8	TG 15:0/18:1-d7/15:0	0.134853	0.669	0.222	0.282	0.655	0.208	0.91	0.219	0.258	0.59	0.191	0.664	0.273	0.23	0.531	0.158	0.517	0.112	0.208	0.429	0.15	0.543	0.251	0.335	0.485	0.218	0.62	0.219	0.317	0.577	0.182	0.53	0.195	0.267	0.462	0.165
TG 54:1	TG	Positive	M+NH4	906.848	10.23	TG 20:0/20:1/20:0-d5	0.124447	4.75	3.17	2.74	6.42	4	5.43	2.79	2.31	6.2	3.05	5.8	3.45	2.25	4.89	3.8	6.94	1.99	2.26	5.69	2.51	4.67	2.88	2.61	4.91	2.86	4.92	3.39	2.49	7.53	2.67	4.32	2.57	2.18	5.4	2.9
TG 54:2	TG	Positive	M+NH4	904.833	9.95	TG 20:0/20:1/20:0-d5	0.179641	81.7	31.5	33.9	74.5	35.4	106	30.5	27.3	94.5	25.5	95.6	33	25.2	59.2	32.5	272	17	31.4	68.7	22.3	76.9	26	34.8	53.2	27.1	80.6	35.9	41.3	96.6	27	67.8	26.9	30.3	65.2	22.9
TG 54:3	TG	Positive	M+NH4	902.817	9.67	TG 15:0/18:1-d7/15:0	0.135805	82.4	41.5	54.1	80.9	47.2	104	46	48.5	75.9	35.6	94.9	48.7	38.7	76.1	36.2	70.1	25.2	35.7	64.8	35.4	76.3	44	55.4	69.5	47.6	88.2	36.6	52.2	83.2	38.2	70.1	38.3	43	60.8	30.8
TG 54:4	TG	Positive	M+NH4	900.801	9.33	TG 15:0/18:1-d7/15:0	0.1461	80.2	36.4	59.7	86.3	43.8	99.3	36.1	43.7	71.7	32.5	85	49.9	40.4	75.8	28.6	59.6	23.7	34.2	57.4	28.2	71.9	44	59.4	73.5	43.9	71.3	39.3	59.2	79.2	36.2	71.4	39.3	46.9	68.6	29.5
TG 54:5	TG	Positive	M+NH4	898.786	9.05	TG 15:0/18:1-d7/15:0	0.102942	50.7	21.1	27.7	46.1	21.2	64.8	25.1	21.5	42.3	18.5	53.3	21.6	21.6	37.9	18	40.9	12.7	18.5	36.2	14.2	43.5	20.8	30.7	39.6	23.5	55.2	22.2	30	46.2	20.6	41.5	19.2	22.5	40.6	16.6
TG 54:6	TG	Positive	M+NH4	896.77	8.76	TG 14:0/16:1/14:0-d5	0.0872573	7.52	3.76	4	7.83	3.04	6.87	3.66	3.85	6.86	3.48	6.71	3.3	3.82	6.47	2.86	5.5	2.18	3.19	5.51	2.46	6.48	3.54	4.27	6.87	3.26	7.37	3.94	4.28	7.11	2.89	5.09	2.76	3.43	4.99	2.64
TG 55:1	TG	Positive	M+NH4	920.864	10.37	TG 20:0/20:1/20:0-d5	0.108372	0.424	0.189	0.179	0.436	0.189	0.424	0.163	0.153	0.507	0.172	0.395	0.185	0.152	0.349	0.195	0.501	0.095	0.139	0.393	0.142	0.381	0.168	0.18	0.347	0.165	0.375	0.184	0.182	0.482	0.16	0.318	0.159	0.156	0.392	0.161
TG 55:2	TG	Positive	M+NH4	918.848	10.1	TG 20:0/20:1/20:0-d5	0.140915	4.91	1.44	1.69	4.11	1.36	5.42	1.35	1.36	4.76	1.38	5.11	1.58	1.26	3.4	1.4	10.9	0.719	1.19	3.68	0.904	5.01	1.32	1.64	2.99	1.29	5.12	1.57	1.7	5.34	1.12	3.81	1.28	1.46	3.74	1.13
TG 55:3	TG	Positive	M+NH4	916.833	9.82	TG 20:0/20:1/20:0-d5	0.118238	11.8	2.85	3.27	9.35	2.4	12.5	2.64	2.78	9.52	2.43	11.5	2.81	2.55	6.79	2.58	33.6	1.45	2.67	6.98	1.66	10.3	2.79	3.36	5.72	2.26	10	2.98	3.62	11.3	2.11	7.88	2.49	3.03	7.91	2.03
TG 55:6	TG	Positive	M+NH4	910.786	9	TG 15:0/18:1-d7/15:0	0.133777	0.208	0.0781	0.102	0.195	0.079	0.271	0.0852	0.0915	0.172	0.0705	0.211	0.0845	0.0784	0.153	0.0652	0.154	0.042	0.0701	0.144	0.0523	0.179	0.0841	0.113	0.163	0.0916	0.193	0.0771	0.109	0.186	0.0799	0.161	0.0683	0.0909	0.15	0.0626
TG 56:1	TG	Positive	M+NH4	934.88	10.52	TG 20:0/20:1/20:0-d5	0.0856525	0.818	0.445	0.414	1.05	0.532	1	0.397	0.317	1.15	0.438	0.906	0.439	0.311	0.868	0.494	0.919	0.24	0.317	0.938	0.353	0.848	0.39	0.398	0.829	0.454	0.922	0.461	0.394	1.17	0.386	0.679	0.394	0.385	0.834	0.406
TG 56:2	TG	Positive	M+NH4	932.864	10.26	TG 20:0/20:1/20:0-d5	0.111993	11.8	3.99	4.65	12.1	4.97	13.7	3.76	3.72	13	4.2	14.1	4.4	3.53	9.15	5.06	24.5	2.46	3.52	11.1	3.07	11.4	3.9	4.7	8.25	3.89	12.7	4.64	4.77	16.2	3.5	9.51	3.72	3.96	10.4	3.83
TG 56:3	TG	Positive	M+NH4	930.848	9.98	TG 20:0/20:1/20:0-d5	0.167045	32.2	10.7	13.5	27.7	11.4	38.8	9.5	10.7	34	8.72	35.1	11.2	10.5	20.8	10.7	101	5.68	11.1	24.5	7.56	29.8	9.15	13.7	18.1	9.31	31	12.1	16.4	34.2	8.88	27	9.23	12.2	23.5	7.97
TG 56:4	TG	Positive	M+NH4	928.833	9.69	TG 15:0/18:1-d7/15:0	0.107072	6.87	3.56	4.76	7.24	4.28	8.41	3.88	4.15	6.42	3.42	7.92	4.16	3.3	6.68	3.53	5.14	2.1	3.08	5.64	3.32	6.44	3.85	5.12	6.18	4.41	7.41	3.06	4.69	7.34	3.75	5.78	3.28	3.91	5.67	2.96
TG 56:6	TG	Positive	M+NH4	924.801	9.2	TG 15:0/18:1-d7/15:0	0.0754226	9.62	3.37	4.63	7.79	3.41	10.4	3.6	4.18	7.63	3.28	8.94	3.54	3.78	7.08	3.04	6.71	1.89	3.2	5.69	2.45	8.51	3.64	4.88	7.56	3.94	8.69	3.48	4.57	7.84	3.4	6.77	2.88	3.92	6.29	2.74
TG 56:7	TG	Positive	M+NH4	922.786	8.92	TG 15:0/18:1-d7/15:0	0.10248	5.37	2.17	2.91	5.31	2.73	7.3	2.32	2.61	4.59	2.4	5.72	2.65	2.32	4.22	2.1	4.61	1.24	2.09	3.78	1.8	4.3	2.43	3.52	4.01	2.83	5.68	2.1	3.25	4.95	2.63	4.24	2.04	2.49	3.9	2.05
TG 56:8	TG	Positive	M+NH4	920.77	8.57	TG 14:0/16:1/14:0-d5	0.0716482	0.998	0.488	0.591	0.939	0.483	0.975	0.496	0.603	0.934	0.557	0.985	0.496	0.538	0.887	0.469	0.742	0.306	0.469	0.776	0.392	0.905	0.472	0.619	0.98	0.541	1.06	0.557	0.654	1.02	0.474	0.753	0.408	0.447	0.696	0.412
TG 56:9	TG	Positive	M+NH4	918.755	8.21	TG 14:0/16:1/14:0-d5	0.138837	0.116	0.0545	0.073	0.108	0.0547	0.111	0.057	0.0695	0.103	0.0628	0.119	0.0557	0.0612	0.0946	0.0564	0.0945	0.0333	0.0542	0.0861	0.0454	0.127	0.0596	0.0765	0.112	0.0608	0.126	0.0589	0.0767	0.116	0.0577	0.0855	0.046	0.0626	0.0801	0.049
TG 57:1	TG	Positive	M+NH4	948.895	10.66	TG 20:0/20:1/20:0-d5	0.0982854	0.173	0.078	0.0774	0.192	0.086	0.192	0.0677	0.0647	0.209	0.0743	0.18	0.0775	0.0613	0.178	0.0757	0.166	0.0417	0.0598	0.16	0.0591	0.157	0.0699	0.076	0.144	0.0746	0.173	0.0767	0.0727	0.222	0.0659	0.146	0.0697	0.0627	0.16	0.069
TG 57:2	TG	Positive	M+NH4	946.88	10.4	TG 20:0/20:1/20:0-d5	0.118097	1.33	0.411	0.449	1.25	0.418	1.45	0.349	0.36	1.43	0.374	1.31	0.388	0.343	0.925	0.427	1.98	0.19	0.323	1.08	0.286	1.22	0.375	0.446	0.908	0.383	1.28	0.411	0.492	1.5	0.334	0.957	0.348	0.381	1.14	0.349
TG 57:3	TG	Positive	M+NH4	944.864	10.13	TG 15:0/18:1-d7/15:0	0.15447	0.632	0.256	0.348	0.723	0.317	0.801	0.29	0.285	0.654	0.296	0.658	0.331	0.269	0.636	0.245	0.28	0.137	0.206	0.487	0.209	0.611	0.292	0.381	0.635	0.341	0.647	0.276	0.346	0.717	0.287	0.537	0.229	0.282	0.499	0.233
TG 57:4	TG	Positive	M+NH4	942.848	9.85	TG 15:0/18:1-d7/15:0	0.140072	0.345	0.12	0.153	0.365	0.143	0.41	0.134	0.139	0.301	0.132	0.328	0.147	0.129	0.284	0.114	0.188	0.0671	0.115	0.217	0.0967	0.27	0.147	0.178	0.276	0.144	0.286	0.128	0.167	0.348	0.14	0.242	0.114	0.137	0.246	0.105
TG 58:1	TG	Positive	M+NH4	962.911	10.8	TG 20:0/20:1/20:0-d5	0.0714869	0.407	0.205	0.17	0.442	0.21	0.438	0.183	0.159	0.468	0.188	0.434	0.2	0.146	0.401	0.198	0.323	0.097	0.145	0.414	0.148	0.401	0.168	0.162	0.326	0.17	0.372	0.201	0.16	0.523	0.169	0.317	0.152	0.139	0.376	0.172
TG 58:10	TG	Positive	M+NH4	944.77	8.4	TG 14:0/16:1/14:0-d5	0.160462	0.795	0.235	0.302	0.535	0.261	0.854	0.223	0.279	0.668	0.257	0.821	0.267	0.208	0.473	0.314	2.84	0.128	0.253	0.567	0.183	0.761	0.243	0.328	0.388	0.266	0.748	0.247	0.344	0.744	0.245	0.585	0.253	0.261	0.531	0.239
TG 58:2	TG	Positive	M+NH4	960.895	10.55	TG 20:0/20:1/20:0-d5	0.102999	3.31	1.21	1.18	3.54	1.28	4.22	1.07	0.93	4.04	1.13	3.68	1.18	0.819	2.59	1.26	4.1	0.563	0.864	3.09	0.837	3.42	1.08	1.17	2.46	1.13	3.74	1.31	1.22	4.31	0.93	2.55	1.08	1.16	3.1	1.03
TG 58:3	TG	Positive	M+NH4	958.88	10.28	TG 20:0/20:1/20:0-d5	0.107493	6.05	1.73	2.17	5.28	1.99	6.63	1.74	1.72	6.19	1.76	6.84	1.94	1.62	4.21	2.09	11.3	1.07	1.61	4.92	1.27	5.68	1.69	2.25	3.73	1.63	6.38	2.11	2.35	6.99	1.46	4.52	1.72	1.88	4.83	1.57
TG 58:4	TG	Positive	M+NH4	956.864	10	TG 20:0/20:1/20:0-d5	0.132819	3.11	1.06	1.19	2.69	1.05	3.63	0.91	0.976	3.29	0.892	3.37	1.08	0.975	2	1.06	8.39	0.539	0.931	2.42	0.73	2.91	0.942	1.23	1.73	0.938	3.04	1.19	1.39	3.43	0.885	2.61	0.904	1.12	2.35	0.799
TG 58:5	TG	Positive	M+NH4	954.848	9.74	TG 20:0/20:1/20:0-d5	0.112757	3.74	1.12	1.37	2.8	1.18	4.2	1.06	1.12	3.31	1.09	3.99	1.03	0.951	2.43	1.26	11.3	0.575	1.07	2.62	0.849	3.69	1.02	1.45	2.01	1.07	3.58	1.01	1.42	3.81	0.857	2.82	1.06	1.22	3	0.954
TG 58:6	TG	Positive	M+NH4	952.833	9.47	TG 15:0/18:1-d7/15:0	0.117182	2.04	0.855	1.27	1.88	1.02	2.58	1.01	1.04	2.05	0.854	2.06	1	0.825	1.93	0.804	1.39	0.443	0.782	1.55	0.697	1.76	0.963	1.41	1.83	1.14	2.18	0.876	1.18	1.94	0.959	1.77	0.732	0.998	1.48	0.721
TG 58:7	TG	Positive	M+NH4	950.817	9.17	TG 15:0/18:1-d7/15:0	0.0794184	2.21	0.805	1.18	1.82	0.936	2.28	0.845	1.01	1.84	0.843	1.94	0.962	0.902	1.66	0.734	1.49	0.486	0.756	1.28	0.693	1.87	0.94	1.24	1.74	1.02	1.91	0.785	1.18	1.78	0.873	1.53	0.756	0.971	1.53	0.725
TG 58:8	TG	Positive	M+NH4	948.801	9	TG 15:0/18:1-d7/15:0	0.103089	2.2	0.892	1.12	1.9	0.996	2.83	1.04	0.91	1.72	0.915	2.31	0.951	0.889	1.52	0.856	1.71	0.515	0.771	1.46	0.695	1.86	0.907	1.32	1.55	1.14	2.36	0.907	1.27	1.89	0.978	1.76	0.812	0.985	1.57	0.803
TG 58:9	TG	Positive	M+NH4	946.786	8.66	TG 14:0/16:1/14:0-d5	0.0828937	0.642	0.293	0.317	0.608	0.258	0.563	0.312	0.309	0.504	0.296	0.569	0.263	0.299	0.507	0.26	0.459	0.184	0.263	0.433	0.209	0.559	0.282	0.342	0.559	0.3	0.631	0.331	0.346	0.546	0.253	0.422	0.226	0.266	0.383	0.244
TG 59:2	TG	Positive	M+NH4	974.911	10.69	TG 20:0/20:1/20:0-d5	0.12671	0.653	0.193	0.207	0.633	0.209	0.784	0.17	0.176	0.69	0.202	0.674	0.186	0.152	0.514	0.201	0.623	0.0897	0.151	0.525	0.144	0.572	0.181	0.221	0.421	0.194	0.674	0.2	0.206	0.811	0.165	0.488	0.177	0.183	0.539	0.173
TG 59:3	TG	Positive	M+NH4	972.895	10.42	TG 20:0/20:1/20:0-d5	0.118918	0.884	0.252	0.279	0.842	0.247	1.01	0.224	0.22	0.913	0.227	0.923	0.24	0.209	0.623	0.258	1.27	0.117	0.2	0.702	0.174	0.833	0.243	0.284	0.581	0.241	0.876	0.262	0.303	1	0.205	0.644	0.212	0.234	0.757	0.211
TG 59:4	TG	Positive	M+NH4	970.88	10.15	TG 15:0/18:1-d7/15:0	0.143364	0.148	0.0574	0.0786	0.176	0.0726	0.191	0.0679	0.0635	0.165	0.0727	0.164	0.0731	0.059	0.153	0.0596	0.0581	0.0335	0.0482	0.116	0.0493	0.15	0.067	0.0862	0.156	0.0814	0.154	0.0638	0.0775	0.177	0.0716	0.127	0.0514	0.063	0.121	0.056
TG 60:10	TG	Positive	M+NH4	972.801	8.85	TG 15:0/18:1-d7/15:0	0.159084	0.142	0.064	0.0794	0.152	0.079	0.185	0.0655	0.0733	0.129	0.0748	0.155	0.0711	0.0613	0.129	0.0728	0.101	0.0333	0.0593	0.107	0.0529	0.119	0.0716	0.0935	0.119	0.0896	0.143	0.0611	0.0975	0.144	0.0787	0.01665	0.0479	0.073	0.112	0.0625
TG 60:11	TG	Positive	M+NH4	970.786	8.53	TG 15:0/18:1-d7/15:0	0.195654	0.0862	0.0363	0.0584	0.0786	0.0511	0.108	0.0389	0.0593	0.0764	0.0472	0.0918	0.0527	0.0442	0.0813	0.0484	0.0677	0.0232	0.0427	0.0633	0.0371	0.0767	0.0414	0.0675	0.0799	0.0624	0.0899	0.0385	0.0626	0.0842	0.0487	0.0728	0.0374	0.0451	0.0697	0.0422
TG 60:12	TG	Positive	M+NH4	968.77	8.2	TG 14:0/16:1/14:0-d5	0.135058	0.0344	0.0195	0.0297	0.0277	0.0275	0.0333	0.0217	0.0278	0.0276	0.0328	0.0377	0.0203	0.0243	0.0248	0.0298	0.0273	0.0127	0.0208	0.0228	0.025	0.0405	0.0225	0.0311	0.0281	0.0329	0.0381	0.0215	0.0304	0.0314	0.0317	0.0258	0.0173	0.0248	0.0205	0.0256
TG 60:2	TG	Positive	M+NH4	988.927	10.82	TG 20:0/20:1/20:0-d5	0.0944331	1.59	0.52	0.466	1.45	0.52	1.81	0.465	0.422	1.66	0.485	1.65	0.499	0.363	1.21	0.529	1.27	0.222	0.385	1.34	0.362	1.54	0.457	0.491	0.942	0.465	1.44	0.539	0.494	1.92	0.425	1.13	0.424	0.413	1.35	0.412
TG 60:3	TG	Positive	M+NH4	986.911	10.55	TG 20:0/20:1/20:0-d5	0.0995929	2.64	0.875	0.817	2.59	0.885	3.34	0.766	0.668	3.02	0.792	2.91	0.833	0.596	1.85	0.859	3.21	0.392	0.598	2.26	0.577	2.74	0.784	0.85	1.79	0.782	2.95	0.972	0.896	3.18	0.64	1.98	0.764	0.841	2.34	0.73
TG 60:4	TG	Positive	M+NH4	984.895	10.29	TG 20:0/20:1/20:0-d5	0.136261	0.587	0.214	0.263	0.612	0.293	0.699	0.253	0.237	0.591	0.232	0.623	0.287	0.203	0.525	0.241	0.191	0.131	0.164	0.419	0.185	0.498	0.234	0.31	0.539	0.288	0.581	0.261	0.286	0.605	0.247	0.441	0.216	0.223	0.454	0.206
TG 60:5	TG	Positive	M+NH4	982.88	10.02	TG 15:0/18:1-d7/15:0	0.111404	0.203	0.0794	0.102	0.219	0.109	0.252	0.0865	0.0942	0.202	0.0906	0.219	0.108	0.0843	0.172	0.0824	0.0943	0.0443	0.0647	0.154	0.0703	0.181	0.0916	0.115	0.179	0.112	0.197	0.0882	0.11	0.221	0.106	0.178	0.0713	0.0929	0.16	0.0778
TG 60:6	TG	Positive	M+NH4	980.864	9.75	TG 15:0/18:1-d7/15:0	0.125154	0.226	0.0916	0.106	0.234	0.126	0.262	0.104	0.0994	0.199	0.103	0.225	0.107	0.0858	0.199	0.0979	0.123	0.0474	0.0799	0.149	0.0842	0.191	0.0983	0.134	0.181	0.124	0.189	0.0849	0.122	0.222	0.104	0.168	0.0844	0.0982	0.175	0.0874
TG 60:7	TG	Positive	M+NH4	978.848	9.59	TG 15:0/18:1-d7/15:0	0.122044	0.286	0.122	0.165	0.294	0.148	0.339	0.152	0.15	0.302	0.122	0.278	0.15	0.119	0.269	0.119	0.184	0.0689	0.109	0.206	0.103	0.201	0.154	0.169	0.248	0.178	0.273	0.124	0.163	0.282	0.13	0.197	0.0971	0.126	0.194	0.103
TG 60:8	TG	Positive	M+NH4	976.833	9.28	TG 15:0/18:1-d7/15:0	0.133405	0.208	0.0892	0.151	0.272	0.133	0.288	0.134	0.107	0.233	0.127	0.257	0.104	0.134	0.177	0.107	0.176	0.0783	0.114	0.206	0.0924	0.23	0.142	0.164	0.24	0.159	0.242	0.127	0.154	0.26	0.134	0.173	0.123	0.138	0.209	0.107
TG 62:2	TG	Positive	M+NH4	1016.96	11.07	TG 15:0/18:1-d7/15:0	0.199643	0.11	0.0537	0.0605	0.172	0.0805	0.148	0.0574	0.0546	0.147	0.0655	0.123	0.0604	0.048	0.133	0.0584	0.0139	0.0256	0.0383	0.0994	0.0523	0.105	0.0608	0.0705	0.133	0.0812	0.11	0.0575	0.0638	0.155	0.0672	0.0949	0.0436	0.0524	0.116	0.0503
TG 63:3	TG	Positive	M+NH4	1014.94	10.85	TG 15:0/18:1-d7/15:0	0.188206	0.187	0.0824	0.0793	0.218	0.105	0.246	0.0833	0.0795	0.201	0.087	0.201	0.0925	0.0661	0.188	0.0803	0.029	0.0354	0.0554	0.155	0.0722	0.169	0.0869	0.0943	0.171	0.104	0.168	0.0804	0.0865	0.222	0.0922	0.143	0.0655	0.0714	0.162	0.0748
TG O-50:1	TG	Positive	M+NH4	836.807	10.04	TG 15:0/18:1-d7/15:0	0.163669	0.0679	0.0252	0.0288	0.0623	0.0244	0.0848	0.0271	0.023	0.0552	0.0219	0.0706	0.032	0.0233	0.0572	0.0184	0.0382	0.0143	0.0178	0.04	0.0144	0.067	0.0289	0.0313	0.0589	0.0257	0.0735	0.0263	0.0283	0.0613	0.0238	0.06	0.0216	0.0224	0.0449	0.0168
TG O-50:2	TG	Positive	M+NH4	862.822	10.06	TG 15:0/18:1-d7/15:0	0.170312	0.156	0.0569	0.0662	0.145	0.0569	0.199	0.0646	0.0526	0.137	0.0561	0.169	0.0746	0.0487	0.128	0.046	0.0847	0.0325	0.0382	0.101	0.0371	0.158	0.0636	0.0711	0.134	0.062	0.166	0.0615	0.0674	0.155	0.0518	0.137	0.0529	0.0522	0.103	0.041
TG O-50:3	TG	Positive	M+NH4	860.807	9.78	TG 15:0/18:1-d7/15:0	0.153215	0.139	0.0458	0.0442	0.117	0.0431	0.155	0.0489	0.041	0.0957	0.0384	0.129	0.0549	0.0371	0.0962	0.0345	0.0866	0.0242	0.0328	0.0739	0.0289	0.108	0.0556	0.0499	0.0956	0.0473	0.103	0.0489	0.0467	0.12	0.0433	0.0944	0.0415	0.0411	0.0863	0.0309
TG O-52:3	TG	Positive	M+NH4	888.838	10.09	TG 15:0/18:1-d7/15:0	0.152588	0.0875	0.037	0.039	0.101	0.0374	0.12	0.0416	0.032	0.0818	0.0359	0.1	0.0456	0.0302	0.076	0.0315	0.0467	0.0208	0.0248	0.0633	0.0262	0.0884	0.0414	0.0416	0.0831	0.0424	0.094	0.0399	0.0406	0.101	0.03	0.0788	0.0349	0.0317	0.0616	0.0283

## Sheet: Heart Data
Analyte	Class	Polarity	Adduct	Expected Mass (m/z)	Retention Time [min]	Internal Standard	QC RSD	heart_ct_1	heart_ct_2	heart_ct_3	heart_ct_4	heart_ct_5	heart_Ice_035_1	heart_Ice_035_2	heart_Ice_035_3	heart_Ice_035_4	heart_Ice_035_5	heart_Ice_090_1	heart_Ice_090_2	heart_Ice_090_3	heart_Ice_090_4	heart_Ice_090_5	heart_Ice_120_1	heart_Ice_120_2	heart_Ice_120_3	heart_Ice_120_4	heart_Ice_120_5	heart_RT_035_1	heart_RT_035_2	heart_RT_035_3	heart_RT_035_4	heart_RT_035_5	heart_RT_090_1	heart_RT_090_2	heart_RT_090_3	heart_RT_090_4	heart_RT_090_5	heart_RT_120_1	heart_RT_120_2	heart_RT_120_3	heart_RT_120_4	heart_RT_120_5
Cer 18:0;O2/16:0	Cer	Positive	M+H	540.535	5.13	Cer d18:1/16:0-d7	0.169804	0.09	0.0377	0.0473	0.0559	0.124	0.0924	0.0647	0.0397	0.0581	0.0809	0.102	0.0881	0.0841	0.0707	0.0772	0.0739	0.0617	0.0584	0.0519	0.0604	0.345	0.255	0.292	0.297	0.241	0.536	0.317	0.369	0.4	0.382	0.528	0.263	0.315	0.33	0.332
Cer 18:1;O2/16:0	Cer	Positive	M+H	538.519	4.92	Cer d18:1/16:0-d7	0.0879157	1.5	0.818	1.03	1.02	1.45	1.54	0.993	1.25	1.1	1.49	2.02	1.05	1.49	1.22	1.32	1.46	0.853	1.11	0.923	1.18	4.5	3.05	3.57	2.98	3.15	6.19	3.82	4.91	4.98	4.55	5.84	3.52	4.26	4.07	4.04
Cer 18:1;O2/18:0	Cer	Positive	M+H	566.551	5.48	Cer d18:1/16:0-d7	0.12087	0.736	0.392	0.518	0.498	0.579	0.735	0.474	0.594	0.415	0.756	0.904	0.579	0.639	0.566	0.533	0.579	0.335	0.403	0.375	0.478	1.69	1.28	1.37	1.16	1.18	2	1.32	1.4	1.5	1.36	2.02	1.04	1.17	1.13	1.18
Cer 18:1;O2/20:0	Cer	Positive	M+H	594.582	6.16	Cer d18:1/16:0-d7	0.100885	1.13	0.742	1.03	0.897	1.19	1.19	0.76	0.98	0.693	1.39	1.37	0.944	1.04	0.759	1.09	0.928	0.58	0.663	0.511	0.736	1.95	1.31	1.83	1.5	1.85	2.29	1.39	1.79	1.57	2.07	2.01	1.2	1.36	1.24	1.41
Cer 18:1;O2/21:0	Cer	Positive	M+H	608.598	6.45	Cer d18:1/16:0-d7	0.121505	0.408	0.19	0.261	0.318	0.339	0.419	0.254	0.343	0.204	0.442	0.43	0.245	0.336	0.23	0.349	0.329	0.15	0.218	0.00404	0.25	0.635	0.385	0.514	0.425	0.547	0.66	0.423	0.544	0.44	0.543	0.631	0.319	0.383	0.364	0.39
Cer 18:1;O2/22:0	Cer	Positive	M+H	622.613	6.67	Cer d18:1/16:0-d7	0.0862225	2.06	1.42	2.09	1.54	2.02	2.15	1.48	1.92	1.35	2.36	2.2	1.62	1.92	1.36	1.93	1.62	1.03	1.17	0.983	1.27	3.08	2.03	2.81	2.17	2.7	3.24	2.36	2.68	2.46	3.12	3.13	1.59	1.96	1.95	2.22
Cer 18:1;O2/23:0	Cer	Positive	M+H	636.629	6.98	Cer d18:1/16:0-d7	0.108602	0.664	0.426	0.515	0.561	0.612	0.776	0.445	0.524	0.39	0.701	0.723	0.401	0.536	0.512	0.475	0.538	0.318	0.401	0.356	0.364	0.903	0.592	0.791	0.671	0.744	0.927	0.632	0.736	0.752	0.897	1.01	0.523	0.565	0.612	0.656
Cer 18:1;O2/24:0	Cer	Positive	M+H	650.645	7.27	Cer d18:1/16:0-d7	0.10787	0.872	0.647	0.781	0.726	0.977	0.918	0.72	0.853	0.698	0.847	1.01	0.752	0.872	0.698	0.685	0.648	0.559	0.488	0.52	0.481	1.37	1.02	1.2	1.09	1.04	1.36	1	1.14	1.06	1.23	1.37	0.8	0.893	0.91	0.961
Cer 18:1;O2/24:1	Cer	Positive	M+H	648.629	6.69	Cer d18:1/16:0-d7	0.107321	1.39	1.04	1.45	1.12	1.33	1.51	1.22	1.43	1.06	1.58	1.66	1.42	1.58	1.23	1.31	1.26	0.946	0.946	0.831	0.889	2.34	1.75	2.28	1.9	2.03	2.62	1.98	2.16	2.29	2.36	2.43	1.49	1.7	1.82	1.8
Cer 18:2;O2/22:0	Cer	Positive	M+H	620.598	6.2	Cer d18:1/16:0-d7	0.0813644	1.21	0.729	1.18	0.74	1.31	1.28	0.772	1.01	0.83	1.55	1.48	0.816	1.22	0.887	1.18	0.987	0.572	0.799	0.567	0.828	1.6	1.07	1.46	1.13	1.46	1.53	0.986	1.45	1.19	1.71	1.57	0.951	1.11	0.983	1.12
Cer 18:2;O2/23:0	Cer	Positive	M+H	634.613	6.51	Cer d18:1/16:0-d7	0.125811	0.409	0.187	0.356	0.232	0.371	0.373	0.241	0.305	0.248	0.451	0.409	0.206	0.373	0.258	0.359	0.342	0.136	0.259	0.159	0.284	0.523	0.276	0.435	0.366	0.48	0.474	0.317	0.431	0.401	0.503	0.492	0.257	0.292	0.27	0.378
Cer 18:2;O2/24:1	Cer	Positive	M+H	646.613	6.21	Cer d18:1/16:0-d7	0.0913884	0.358	0.262	0.297	0.269	0.338	0.39	0.268	0.259	0.264	0.401	0.414	0.307	0.383	0.311	0.299	0.285	0.175	0.203	0.211	0.245	0.553	0.408	0.442	0.363	0.403	0.529	0.385	0.468	0.452	0.529	0.55	0.385	0.357	0.383	0.384
DG 36:2	DG	Positive	M+NH4	638.572	6.05	DG 15:0/18:1-d7	0.124618	2.05	1.14	0.713	0.799	1.31	1.06	1.1	0.856	0.69	1.42	1.59	1.06	0.862	0.94	1.38	1.26	0.89	0.775	0.627	1.04	1.75	1.33	0.83	0.982	1.61	2.09	1.08	1.04	1.17	1.86	1.55	1.13	0.944	0.711	1.82
DG 36:3	DG	Positive	M+NH4	636.556	5.6	DG 15:0/18:1-d7	0.152423	6.66	2.9	1.97	2.29	3.31	3.03	2.19	1.67	2.19	3.44	4.69	2.09	1.9	2.44	3.48	3.69	1.99	2.13	2.45	3.24	4.47	3.24	1.8	2.55	3.57	5.76	2.23	2.2	3.49	4.62	4.53	2.86	2.08	1.72	5.87
DG 38:4	DG	Positive	M+NH4	662.572	5.9	DG 15:0/18:1-d7	0.197664	5.49	3.07	2.61	1.99	4.56	2.49	2.49	1.53	2.9	5.28	4.32	2.82	3.33	5.35	6.51	3.87	3.18	4.02	5.57	5.03	3.75	2.86	2.31	2.74	3.34	3.37	1.27	2.98	6.16	4.68	2.95	2.81	3.27	2.87	6.93
HexCer 18:1;O2/22:0	HexCer	Positive	M+H	784.666	6.07	LacCer d18:1/17:0	0.0969275	0.184	0.0896	0.139	0.17	0.227	0.14	0.131	0.173	0.166	0.128	0.146	0.0937	0.146	0.103	0.126	0.139	0.0951	0.0907	0.065	0.0913	0.164	0.0825	0.139	0.119	0.181	0.151	0.121	0.0808	0.12	0.134	0.117	0.0537	0.0938	0.0677	0.11
LPC 14:0	LPC	Positive	M+H	468.308	2.45	LPC 18:1-d7	0.180335	0.00531	0.00535	0.00753	0.00552	0.00493	0.00558	0.00637	0.00786	0.00481	0.00709	0.00598	0.00488	0.00787	0.00779	0.00469	0.00321	0.00355	0.00458	0.00423	0.00447	0.00861	0.00969	0.00759	0.00901	0.00908	0.00912	0.00972	0.0126	0.0108	0.0109	0.00751	0.00961	0.011	0.00867	0.00885
LPC 16:0	LPC	Positive	M+H	496.34	2.61	LPC 18:1-d7	0.107038	2.08	1.99	1.72	1.93	1.91	2	1.89	2.21	1.61	2.45	1.85	1.55	1.79	2.06	1.74	1.55	1.21	1.21	1.1	1.26	2.29	2.15	2.09	2.13	2.28	2.47	2.28	2.1	2.48	2.27	2.06	1.88	1.9	1.68	1.73
LPC 16:1	LPC	Positive	M+H	494.324	2.49	LPC 18:1-d7	0.117915	0.0406	0.0326	0.0463	0.04	0.0347	0.0445	0.0399	0.0583	0.0274	0.0535	0.0347	0.0383	0.0514	0.0506	0.0423	0.0289	0.0266	0.0312	0.0249	0.0326	0.0585	0.0541	0.0558	0.0477	0.0614	0.0597	0.0575	0.0669	0.0535	0.0628	0.0476	0.0504	0.0524	0.0367	0.0463
LPC 17:0	LPC	Positive	M+H	510.355	2.68	LPC 18:1-d7	0.0716472	0.0394	0.0301	0.0294	0.0299	0.0288	0.0347	0.0285	0.0298	0.0247	0.0332	0.0346	0.0245	0.0279	0.0314	0.0251	0.0245	0.0193	0.0204	0.018	0.0183	0.0338	0.031	0.023	0.0321	0.0295	0.0346	0.0284	0.0226	0.0341	0.0286	0.0235	0.0234	0.0236	0.0205	0.0199
LPC 18:0	LPC	Positive	M+H	524.371	2.78	LPC 18:1-d7	0.102169	1.37	1.2	1.34	1.35	1.06	1.3	1.29	1.46	1.08	1.29	1.13	1.24	1.38	1.48	0.987	1.09	0.894	0.936	0.764	0.684	1.38	1.34	1.24	1.3	1.5	1.38	1.22	1.24	1.23	1.28	1.11	0.938	1.1	0.869	0.848
LPC 18:1	LPC	Positive	M+H	522.355	2.65	LPC 18:1-d7	0.0446327	0.711	0.619	0.694	0.643	0.768	0.706	0.648	0.848	0.636	0.879	0.734	0.624	0.835	0.756	0.79	0.599	0.507	0.634	0.509	0.622	1.04	0.95	1.18	1	1.19	1.23	1.09	1.37	1.27	1.41	1.03	1.07	1.31	0.979	1.21
LPC 18:2	LPC	Positive	M+H	520.34	2.53	LPC 18:1-d7	0.193609	0.461	0.28	0.364	0.321	0.346	0.298	0.244	0.271	0.221	0.386	0.333	0.24	0.276	0.306	0.418	0.319	0.211	0.337	0.465	0.507	0.434	0.385	0.358	0.335	0.523	0.447	0.313	0.518	0.507	0.712	0.435	0.435	0.485	0.304	0.849
LPC 19:0	LPC	Positive	M+H	538.387	2.88	LPC 18:1-d7	0.142824	0.0137	0.0121	0.0154	0.0162	0.0152	0.0142	0.0137	0.0167	0.0102	0.016	0.0115	0.0113	0.014	0.0151	0.0136	0.0122	0.00966	0.0101	0.00861	0.00992	0.0154	0.0152	0.0134	0.0125	0.0181	0.0142	0.0137	0.0133	0.013	0.016	0.0137	0.0107	0.0126	0.00869	0.0105
LPC 20:0	LPC	Positive	M+H	552.402	3	LPC 18:1-d7	0.124195	0.0061	0.00508	0.00532	0.00502	0.00635	0.00531	0.00562	0.00654	0.00464	0.0064	0.00485	0.00396	0.00477	0.00525	0.0059	0.00395	0.00378	0.00386	0.00272	0.00431	0.00607	0.00601	0.00559	0.00493	0.00652	0.00449	0.00442	0.00524	0.00496	0.00611	0.00388	0.00443	0.00465	0.00428	0.00449
LPC 20:1	LPC	Positive	M+H	550.387	2.81	LPC 18:1-d7	0.120067	0.0135	0.01	0.0115	0.0114	0.0131	0.0116	0.0111	0.0146	0.00946	0.0163	0.0115	0.011	0.0137	0.0141	0.0141	0.00956	0.0101	0.0106	0.00912	0.00906	0.0164	0.0174	0.0171	0.0171	0.0246	0.017	0.0179	0.0199	0.0176	0.0244	0.0151	0.0156	0.0205	0.0136	0.0196
LPC 24:0	LPC	Positive	M+H	608.465	3.65	LPC 18:1-d7	0.0994519	0.00358	0.00407	0.00339	0.00405	0.00405	0.00348	0.00361	0.00274	0.00282	0.00365	0.00366	0.00315	0.00302	0.00325	0.00354	0.00304	0.00206	0.00219	0.00281	0.00272	0.00373	0.004	0.00238	0.00391	0.00423	0.00336	0.00341	0.0029	0.00296	0.00412	0.00269	0.00234	0.00266	0.00233	0.00296
LPC O-16:0	LPC-O	Negative	M+HCO2	526.351	2.69	LPC O-16:0-d4	0.159449	0.186	0.168	0.15	0.183	0.16	0.149	0.169	0.167	0.17	0.177	0.197	0.168	0.119	0.229	0.15	0.113	0.118	0.0738	0.113	0.0893	0.126	0.128	0.129	0.134	0.161	0.0952	0.109	0.105	0.109	0.0753	0.0972	0.0702	0.0541	0.0703	0.02705
LPC O-16:1	LPC-O	Negative	M+HCO2	524.336	2.69	LPC O-16:0-d4	0.138447	0.255	0.152	0.125	0.163	0.189	0.254	0.225	0.183	0.193	0.312	0.356	0.164	0.186	0.477	0.215	0.29	0.191	0.185	0.195	0.154	0.393	0.312	0.277	0.326	0.344	0.504	0.244	0.362	0.582	0.518	0.419	0.333	0.358	0.438	0.462
LPC O-18:1	LPC-O	Negative	M+HCO2	552.367	2.76	LPC O-16:0-d4	0.199078	0.01555	0.0859	0.0729	0.0668	0.0508	0.057	0.0654	0.0529	0.0643	0.0454	0.0705	0.0689	0.045	0.0923	0.0498	0.0592	0.0515	0.01555	0.064	0.0428	0.047	0.0753	0.0498	0.0758	0.0936	0.0727	0.0532	0.069	0.0755	0.0608	0.042	0.01555	0.0311	0.0516	0.0632
LPE 18:2	LPE	Negative	M-H	476.278	2.57	LPE 18:1-d7	0.1957	3.08	2.62	2.65	2.87	2.62	2.56	1.97	2.16	1.68	2.9	2.92	1.67	2.27	2.55	2.39	2.51	1.74	1.61	0.848	1.63	2.49	1.99	2.66	2.09	3	2.83	1.52	2.59	2.25	2.42	2.58	1.8	2.14	1.25	1.62
LPE 20:1	LPE	Negative	M-H	506.325	2.86	LPE 18:1-d7	0.188717	0.0878	0.0751	0.0999	0.107	0.126	0.0665	0.0913	0.127	0.0774	0.127	0.0987	0.0588	0.112	0.0836	0.093	0.116	0.0797	0.0661	0.0431	0.0928	0.141	0.128	0.196	0.145	0.167	0.168	0.17	0.241	0.197	0.192	0.162	0.157	0.202	0.112	0.127
LPE 20:3	LPE	Negative	M-H	502.294	2.62	LPE 18:1-d7	0.197875	0.164	0.166	0.11	0.0856	0.149	0.122	0.0756	0.0668	0.0719	0.187	0.133	0.0603	0.0915	0.153	0.138	0.14	0.0925	0.103	0.0725	0.12	0.145	0.0871	0.128	0.0968	0.117	0.143	0.0361	0.136	0.144	0.127	0.154	0.125	0.108	0.0687	0.118
LPE 20:4	LPE	Negative	M-H	500.278	2.54	LPE 18:1-d7	0.145849	6.77	3.33	3.51	3.1	3.71	3.82	2.05	1.63	2.04	3.74	5.45	1.97	2.55	4.61	3.85	4.84	2.39	3.48	3.49	4.1	4.27	2.74	3.4	2.67	3.57	5.12	1.18	3.26	4.18	3.72	5.33	3	3.07	2	5.41
LPE 22:4	LPE	Negative	M-H	528.31	2.68	LPE 18:1-d7	0.122471	1.28	0.773	0.784	0.768	0.862	0.648	0.524	0.395	0.452	0.82	0.886	0.463	0.549	0.781	0.676	0.945	0.55	0.535	0.535	0.632	0.745	0.554	0.605	0.558	0.696	0.91	0.268	0.682	0.783	0.709	0.884	0.621	0.551	0.428	0.61
LPE O-18:1	LPE-O	Negative	M-H	464.315	2.95	LPE 18:1-d7	0.293052	0.642	0.476	0.603	0.599	0.561	0.736	0.559	0.592	0.527	1.18	0.997	0.472	0.685	1.22	0.806	1	0.472	0.432	0.207	0.375	0.915	0.692	0.822	0.788	0.895	1.3	0.347	0.869	1.21	0.82	1.11	0.548	0.573	0.566	0.47
LPG 16:0	LPG	Negative	M-H	483.273	2.53	LPG 17:1	0.0848149	0.0991	0.0741	0.0765	0.0812	0.0964	0.112	0.0715	0.0811	0.0923	0.0975	0.111	0.0944	0.0739	0.0939	0.081	0.0933	0.0912	0.0875	0.0793	0.0684	0.181	0.143	0.14	0.137	0.173	0.195	0.176	0.198	0.195	0.208	0.177	0.193	0.224	0.15	0.182
LPI 18:0	LPI	Negative	M-H	599.32	2.65	LPI 17:1	0.0917851	0.563	0.468	0.549	0.792	0.724	0.63	0.49	0.563	0.475	0.747	0.516	0.463	0.47	0.735	0.444	0.479	0.475	0.37	0.298	0.394	0.685	0.555	0.421	0.563	0.603	0.587	0.574	0.465	0.804	0.621	0.577	0.499	0.503	0.457	0.511
LPS 18:0	LPS	Negative	M-H	524.299	2.62	LPI 17:1	0.237774	0.596	0.672	0.872	0.979	0.787	0.737	0.755	0.889	0.653	1.09	0.825	0.724	0.667	1.37	0.554	0.798	0.641	0.574	0.279	0.445	0.895	0.777	0.711	0.856	0.772	0.864	0.894	0.796	1.26	0.896	1.05	0.788	0.766	0.622	0.665
LPS 18:1	LPS	Negative	M-H	522.284	2.45	LPI 17:1	0.216994	0.068	0.0451	0.107	0.0381	0.0747	0.0869	0.099	0.0751	0.0597	0.104	0.0443	0.0793	0.115	0.11	0.0753	0.0832	0.0618	0.0504	0.0407	0.0413	0.11	0.13	0.196	0.101	0.0876	0.169	0.169	0.161	0.215	0.198	0.168	0.198	0.169	0.15	0.199
PC 20:0	PC	Positive	M+H	566.382	2.69	PC 15:0/18:1-d7	0.151346	0.0163	0.0146	0.0142	0.028	0.0133	0.0203	0.0213	0.0272	0.0186	0.0163	0.0185	0.023	0.0166	0.0177	0.0125	0.0112	0.0126	0.00952	0.0042	0.00712	0.0191	0.017	0.0181	0.0193	0.0158	0.0192	0.0229	0.0141	0.0152	0.0131	0.0137	0.0101	0.00971	0.00941	0.00654
PC 22:1	PC	Positive	M+H	592.397	2.73	PC 15:0/18:1-d7	0.194142	0.00909	0.00771	0.00731	0.0126	0.0096	0.0117	0.0111	0.0133	0.00992	0.00967	0.0119	0.00967	0.00913	0.00991	0.00778	0.00641	0.00678	0.00599	0.00217	0.00379	0.0116	0.0102	0.00937	0.0111	0.0103	0.01	0.0123	0.00696	0.00868	0.00813	0.00797	0.00576	0.00574	0.0059	0.00373
PC 28:0	PC	Positive	M+H	678.507	3.8	PC 15:0/18:1-d7	0.19119	0.000236	0.000283	0.000179	0.000375	0.000161	0.000211	0.000196	0.00025	0.000172	0.000256	0.000264	0.000339	0.000276	0.000228	0.000253	0.000203	0.000132	0.000171	0.000134	0.000164	0.000236	0.000252	0.000129	0.000179	9.72e-05	0.000179	0.000227	0.000184	0.000156	0.000161	0.000146	0.000121	0.00019	0.000189	6.63e-05
PC 30:0	PC	Positive	M+H	706.538	4.17	PC 15:0/18:1-d7	0.10569	0.0282	0.0204	0.0223	0.0308	0.0338	0.0275	0.0226	0.0298	0.025	0.0286	0.0278	0.0226	0.0237	0.0261	0.0248	0.0215	0.0173	0.0224	0.019	0.02	0.029	0.0225	0.0298	0.0254	0.0271	0.0224	0.0196	0.0225	0.0245	0.0264	0.0205	0.016	0.0197	0.0156	0.0218
PC 30:1	PC	Positive	M+H	704.522	3.87	PC 15:0/18:1-d7	0.100428	0.00203	0.0016	0.00165	0.0021	0.00165	0.00172	0.00224	0.00191	0.00202	0.00167	0.00208	0.00208	0.00209	0.00188	0.00127	0.00143	0.00181	0.00153	0.00135	0.00129	0.00165	0.00191	0.00197	0.00204	0.00156	0.00137	0.00148	0.00153	0.00175	0.00168	0.00159	0.00117	0.00143	0.0012	0.00128
PC 31:0	PC	Positive	M+H	720.554	4.39	PC 15:0/18:1-d7	0.0921203	0.0235	0.0143	0.0144	0.0176	0.0235	0.021	0.0152	0.0162	0.0151	0.0178	0.0199	0.0152	0.0146	0.0164	0.0184	0.0152	0.0113	0.0106	0.0106	0.0139	0.0209	0.0144	0.015	0.0151	0.0209	0.0202	0.0134	0.0133	0.0143	0.0169	0.017	0.00892	0.0117	0.00966	0.0136
PC 31:2	PC	Positive	M+H	716.522	3.72	PC 15:0/18:1-d7	0.150211	0.00711	0.00513	0.00604	0.00482	0.0106	0.00663	0.00543	0.00537	0.00657	0.0102	0.00823	0.00537	0.00752	0.00728	0.0118	0.00635	0.00491	0.00765	0.00768	0.0101	0.00676	0.00599	0.0078	0.00599	0.00964	0.00673	0.00319	0.00772	0.0075	0.0112	0.0057	0.00487	0.00649	0.00635	0.0125
PC 32:0	PC	Positive	M+H	734.569	4.59	PC 15:0/18:1-d7	0.131714	1.07	0.888	0.822	1.31	1.21	0.857	0.984	0.992	0.956	0.953	1.15	0.881	0.779	1.04	0.85	0.766	0.786	0.693	0.699	0.685	1.11	0.852	0.756	1.01	0.839	1.05	0.905	0.88	0.954	0.843	0.851	0.656	0.603	0.606	0.756
PC 32:1	PC	Positive	M+H	732.554	4.26	PC 15:0/18:1-d7	0.109685	0.106	0.0754	0.089	0.0897	0.127	0.0971	0.0728	0.104	0.0801	0.103	0.111	0.0695	0.0868	0.0791	0.105	0.0808	0.0587	0.081	0.0558	0.0801	0.106	0.072	0.102	0.08	0.109	0.102	0.0584	0.0859	0.0827	0.0982	0.0776	0.0526	0.0716	0.0602	0.0818
PC 32:2	PC	Positive	M+H	730.538	3.93	PC 15:0/18:1-d7	0.105074	0.0109	0.00748	0.00841	0.00895	0.0147	0.00837	0.00663	0.00692	0.00751	0.0121	0.0114	0.00706	0.00839	0.0072	0.0124	0.00845	0.00717	0.00833	0.00833	0.0118	0.00979	0.00732	0.00843	0.00759	0.011	0.00846	0.00484	0.00775	0.009	0.0109	0.00919	0.00558	0.00698	0.00542	0.0122
PC 33:0	PC	Positive	M+H	748.585	4.8	PC 15:0/18:1-d7	0.0636669	0.0173	0.0131	0.0122	0.0181	0.0162	0.0146	0.0132	0.0136	0.015	0.0148	0.016	0.0123	0.011	0.0141	0.013	0.0113	0.00988	0.00973	0.0105	0.00932	0.0154	0.0134	0.0114	0.0142	0.0136	0.0157	0.0118	0.0116	0.0136	0.0127	0.0116	0.0102	0.0099	0.00896	0.0109
PC 33:1	PC	Positive	M+H	746.569	4.47	PC 15:0/18:1-d7	0.0325515	0.0248	0.0171	0.0195	0.0193	0.0287	0.0226	0.0167	0.0193	0.0172	0.0259	0.0232	0.0163	0.0191	0.0167	0.0245	0.0176	0.0119	0.0149	0.0127	0.0193	0.0218	0.0165	0.0195	0.0168	0.027	0.0214	0.015	0.0171	0.0176	0.0247	0.0181	0.0105	0.0151	0.012	0.0204
PC 33:2	PC	Positive	M+H	744.554	4.14	PC 15:0/18:1-d7	0.17004	0.00688	0.00428	0.00296	0.00458	0.0087	0.00463	0.0036	0.00307	0.00385	0.00704	0.00584	0.00346	0.00316	0.00492	0.00625	0.00587	0.00348	0.00414	0.00434	0.0057	0.0061	0.00393	0.00382	0.00438	0.0065	0.00515	0.00223	0.00333	0.00464	0.00614	0.00463	0.0032	0.0035	0.00305	0.00745
PC 34:0	PC	Positive	M+H	762.601	5.1	PC 15:0/18:1-d7	0.0975379	0.136	0.138	0.13	0.178	0.151	0.128	0.154	0.144	0.137	0.139	0.136	0.14	0.133	0.14	0.119	0.105	0.117	0.102	0.106	0.0895	0.134	0.158	0.129	0.171	0.133	0.119	0.131	0.127	0.16	0.132	0.11	0.102	0.107	0.105	0.109
PC 34:1	PC	Positive	M+H	760.585	4.69	PC 15:0/18:1-d7	0.0913743	2.83	1.81	2.19	2.51	3.39	2.25	1.95	2.31	1.95	2.71	2.52	2.09	2.21	2.12	2.58	1.81	1.41	1.84	1.58	1.81	2.7	2.08	2.09	2.42	2.97	2.38	1.42	2.24	2.13	2.4	1.77	1.45	1.91	1.55	1.89
PC 34:2	PC	Positive	M+H	758.569	4.33	PC 15:0/18:1-d7	0.146296	0.968	0.756	0.795	0.848	1.41	0.728	0.752	0.646	0.674	1	0.815	0.669	0.641	0.775	1.18	0.719	0.584	0.723	0.744	1.09	0.861	0.706	0.744	0.698	1.15	0.795	0.477	0.722	0.806	1.14	0.686	0.516	0.614	0.562	1.08
PC 34:3	PC	Positive	M+H	756.554	4.03	PC 15:0/18:1-d7	0.19808	0.0372	0.0201	0.0217	0.0221	0.0414	0.0228	0.0152	0.0175	0.0176	0.0313	0.0289	0.015	0.0157	0.0202	0.033	0.028	0.0143	0.0232	0.0284	0.0357	0.0275	0.0167	0.0195	0.0177	0.0295	0.0235	0.0106	0.0181	0.0222	0.0336	0.0252	0.0145	0.0162	0.0126	0.0404
PC 35:0	PC	Positive	M+H	776.616	5.3	PC 15:0/18:1-d7	0.0755513	0.00273	0.00209	0.00212	0.00296	0.00291	0.00231	0.00225	0.0027	0.0023	0.00238	0.00253	0.00253	0.0021	0.00204	0.0021	0.00193	0.00176	0.00157	0.00188	0.00178	0.00263	0.00217	0.00217	0.00261	0.0022	0.00225	0.00215	0.00206	0.00239	0.00228	0.00201	0.00165	0.00165	0.00162	0.0017
PC 35:1	PC	Positive	M+H	774.601	4.94	PC 15:0/18:1-d7	0.0892776	0.0418	0.027	0.0314	0.0387	0.0505	0.0346	0.0279	0.0355	0.0315	0.0424	0.0411	0.0264	0.0337	0.0302	0.0394	0.0302	0.0229	0.0277	0.0234	0.0316	0.0391	0.0311	0.0324	0.0322	0.0441	0.0345	0.0251	0.0322	0.0316	0.0386	0.0264	0.0202	0.028	0.0214	0.0327
PC 35:2	PC	Positive	M+H	772.585	4.56	PC 15:0/18:1-d7	0.100602	0.0251	0.0173	0.0188	0.0189	0.0332	0.0166	0.017	0.0183	0.0185	0.0298	0.024	0.0152	0.016	0.0197	0.0276	0.0189	0.0148	0.0184	0.0169	0.0214	0.0213	0.0159	0.0176	0.0174	0.0231	0.0221	0.0123	0.0185	0.0195	0.0243	0.0195	0.0134	0.0143	0.0137	0.0279
PC 36:0	PC	Positive	M+H	790.632	5.62	PC 15:0/18:1-d7	0.0882862	0.00763	0.00708	0.00675	0.00915	0.00762	0.00688	0.00759	0.00771	0.00723	0.0081	0.00816	0.00809	0.00734	0.00709	0.00671	0.00551	0.00556	0.00542	0.00533	0.00486	0.00792	0.00816	0.00654	0.00824	0.00753	0.00794	0.00764	0.00688	0.00783	0.00719	0.00677	0.00631	0.00607	0.00539	0.00608
PC 36:1	PC	Positive	M+H	788.616	5.21	PC 15:0/18:1-d7	0.0991929	0.603	0.458	0.584	0.611	0.72	0.559	0.52	0.736	0.496	0.615	0.587	0.465	0.633	0.464	0.534	0.44	0.412	0.502	0.402	0.439	0.513	0.506	0.656	0.605	0.62	0.445	0.433	0.649	0.601	0.594	0.435	0.348	0.484	0.373	0.515
PC 36:2	PC	Positive	M+H	786.601	4.81	PC 15:0/18:1-d7	0.10134	0.951	0.653	0.925	0.79	1.34	0.689	0.688	0.842	0.706	1.05	0.849	0.596	0.708	0.749	1.04	0.614	0.553	0.783	0.687	0.796	0.797	0.699	0.812	0.699	1.01	0.748	0.508	0.834	0.722	0.982	0.648	0.52	0.726	0.505	0.9
PC 36:3	PC	Positive	M+H	784.585	4.46	PC 15:0/18:1-d7	0.156828	0.474	0.297	0.401	0.295	0.56	0.34	0.231	0.268	0.244	0.436	0.343	0.222	0.302	0.268	0.481	0.299	0.227	0.361	0.325	0.511	0.339	0.246	0.35	0.252	0.464	0.332	0.157	0.33	0.325	0.456	0.295	0.207	0.307	0.183	0.48
PC 37:1	PC	Positive	M+H	802.632	5.48	PC 15:0/18:1-d7	0.0740167	0.0112	0.00745	0.0109	0.0102	0.013	0.00974	0.00947	0.0129	0.00901	0.0121	0.0108	0.00942	0.0118	0.00941	0.0102	0.00798	0.00624	0.00878	0.00629	0.00857	0.011	0.00992	0.012	0.00945	0.0122	0.00969	0.00744	0.0101	0.00931	0.011	0.00874	0.006	0.00884	0.00593	0.00886
PC 37:2	PC	Positive	M+H	800.616	5.06	PC 15:0/18:1-d7	0.125457	0.0102	0.00854	0.0105	0.00921	0.0154	0.00945	0.00795	0.00986	0.00766	0.0144	0.0108	0.00778	0.00975	0.00848	0.0124	0.0084	0.00716	0.00978	0.00805	0.0111	0.00991	0.00921	0.00942	0.00885	0.013	0.00859	0.00558	0.00937	0.00969	0.0129	0.00809	0.00628	0.00863	0.00608	0.0129
PC 38:0	PC	Positive	M+H	818.663	6.21	PC 15:0/18:1-d7	0.134128	0.00101	0.000638	0.000797	0.00075	0.00105	0.000986	0.000497	0.000736	0.000772	0.000977	0.00104	0.000685	0.000769	0.000667	0.000678	0.000747	0.000503	0.000562	0.000534	0.000463	0.000944	0.000709	0.000505	0.000844	0.000841	0.000609	0.000644	0.0008	0.000569	0.000826	0.000642	0.000513	0.000551	0.000505	0.000682
PC 38:1	PC	Positive	M+H	816.648	5.68	PC 15:0/18:1-d7	0.0848681	0.0186	0.0159	0.021	0.0214	0.0261	0.0178	0.0198	0.022	0.0184	0.0234	0.0211	0.0187	0.0224	0.0196	0.0208	0.0159	0.0137	0.0151	0.0142	0.0176	0.0197	0.0176	0.0178	0.0191	0.0245	0.0192	0.0154	0.0171	0.0192	0.0216	0.0154	0.0123	0.0137	0.0128	0.017
PC 38:2	PC	Positive	M+H	814.632	5.24	PC 15:0/18:1-d7	0.106888	0.0403	0.0259	0.0329	0.0358	0.0503	0.0351	0.0313	0.0339	0.0287	0.0466	0.0385	0.0272	0.0342	0.029	0.0394	0.0284	0.0246	0.0312	0.0276	0.032	0.0345	0.0299	0.0352	0.0319	0.0419	0.028	0.0226	0.0359	0.0337	0.0408	0.0302	0.0213	0.0285	0.0222	0.0381
PC 38:3	PC	Positive	M+H	812.616	4.93	PC 15:0/18:1-d7	0.184083	0.0743	0.0448	0.0579	0.0536	0.0914	0.0477	0.0366	0.0415	0.0471	0.0698	0.0658	0.0365	0.0515	0.0576	0.0707	0.0532	0.0394	0.0666	0.0664	0.076	0.057	0.0453	0.0541	0.0447	0.0648	0.0504	0.0248	0.058	0.0626	0.0698	0.0456	0.0385	0.0546	0.0381	0.0817
PC 40:0	PC	Positive	M+H	846.695	6.81	PC 15:0/18:1-d7	0.160718	0.000964	0.000835	0.000913	0.0011	0.000833	0.000707	0.000842	0.00094	0.000761	0.000804	0.00114	0.000859	0.000829	0.000795	0.000576	0.00066	0.000765	0.000548	0.000617	0.000603	0.000919	0.000941	0.000708	0.000922	0.00116	0.000934	0.000719	0.000761	0.000898	0.000952	0.000813	0.00055	0.00058	0.00064	0.000791
PC 42:1	PC	Positive	M+H	872.71	6.94	PC 15:0/18:1-d7	0.106423	0.00176	0.00106	0.000919	0.00184	0.00198	0.00144	0.00154	0.00121	0.0012	0.00177	0.00139	0.00148	0.00118	0.00131	0.0015	0.00121	0.00104	0.000824	0.000935	0.00118	0.00142	0.00132	0.00136	0.0015	0.00186	0.00169	0.00115	0.00139	8.13e-05	0.00143	0.00119	0.00108	4.065e-05	0.000927	0.00119
PC O-16:0_16:0	PC-O	Positive	M+H	720.59	4.94	PC O-18:0/18:1-d9	0.132003	0.89	0.701	0.683	1.06	0.872	0.744	0.554	0.72	0.554	0.61	0.685	0.48	0.519	0.519	0.52	0.511	0.386	0.339	0.317	0.383	0.711	0.493	0.515	0.552	0.691	0.655	0.683	0.485	0.494	0.565	0.458	0.355	0.396	0.381	0.372
PC O-16:0_18:2	PC-O	Positive	M+H	744.59	5.02	PC O-18:0/18:1-d9	0.0947831	0.639	0.499	0.528	0.556	0.732	0.553	0.443	0.481	0.436	0.639	0.607	0.396	0.508	0.495	0.549	0.418	0.372	0.418	0.409	0.447	0.545	0.439	0.473	0.454	0.576	0.537	0.37	0.45	0.491	0.592	0.394	0.316	0.412	0.373	0.48
PC O-16:1_18:1	PC-O	Positive	M+H	744.59	4.66	PC O-18:0/18:1-d9	0.114923	0.387	0.307	0.309	0.413	0.363	0.285	0.199	0.272	0.224	0.247	0.265	0.199	0.185	0.26	0.241	0.211	0.16	0.166	0.193	0.186	0.311	0.193	0.214	0.249	0.245	0.302	0.184	0.249	0.263	0.258	0.198	0.171	0.208	0.183	0.197
PC O-16:1_18:2	PC-O	Positive	M+H	742.575	4.6	PC O-18:0/18:1-d9	0.123266	0.339	0.296	0.302	0.324	0.483	0.231	0.236	0.207	0.247	0.339	0.305	0.189	0.204	0.325	0.338	0.245	0.224	0.255	0.332	0.333	0.296	0.199	0.229	0.24	0.27	0.311	0.177	0.272	0.309	0.345	0.226	0.206	0.208	0.207	0.367
PC O-18:1_18:1	PC-O	Positive	M+H	772.621	5.16	PC O-18:0/18:1-d9	0.111142	0.239	0.178	0.182	0.226	0.213	0.205	0.139	0.173	0.141	0.159	0.178	0.126	0.134	0.139	0.136	0.152	0.108	0.104	0.11	0.109	0.175	0.116	0.142	0.166	0.156	0.177	0.134	0.144	0.166	0.178	0.141	0.0971	0.109	0.108	0.12
PC O-18:1_18:2	PC-O	Positive	M+H	770.606	4.75	PC O-18:0/18:1-d9	0.0897001	0.228	0.15	0.148	0.169	0.226	0.122	0.101	0.0962	0.088	0.138	0.138	0.0893	0.0868	0.104	0.138	0.108	0.0815	0.0941	0.123	0.108	0.143	0.0943	0.11	0.102	0.139	0.143	0.0736	0.0988	0.121	0.162	0.0947	0.0894	0.108	0.082	0.117
PC O-33:1	PC-O	Positive	M+H	732.59	4.59	PC O-18:0/18:1-d9	0.158924	0.0198	0.0122	0.0196	0.0187	0.017	0.00855	0.00963	0.0111	0.0154	0.0132	0.0147	0.00938	0.0102	0.0112	0.0159	0.0102	0.00662	0.0115	0.00613	0.00726	0.0101	0.0116	0.0117	0.0122	0.0112	0.0152	0.0107	0.0103	0.0115	0.0105	0.00932	0.00754	0.00766	0.00606	0.00711
PC O-36:0	PC-O	Positive	M+H	776.653	4.9	PC O-18:0/18:1-d9	0.138784	0.0507	0.0297	0.0355	0.0472	0.0366	0.0435	0.0232	0.0389	0.0343	0.0337	0.0435	0.0227	0.0279	0.026	0.0293	0.0289	0.0148	0.0191	0.015	0.0184	0.041	0.0216	0.0337	0.0297	0.0403	0.0405	0.0258	0.0264	0.0283	0.036	0.0275	0.0184	0.022	0.0206	0.0209
PC O-36:1	PC-O	Positive	M+H	774.637	5.51	PC O-18:0/18:1-d9	0.144596	0.098	0.0669	0.0728	0.0897	0.0768	0.0818	0.053	0.0734	0.0678	0.06	0.085	0.0493	0.0648	0.0624	0.0502	0.0576	0.0368	0.0344	0.0442	0.0349	0.0803	0.0473	0.0549	0.0753	0.0675	0.091	0.0624	0.0521	0.0572	0.0621	0.064	0.0322	0.0475	0.0448	0.0375
PC O-38:3	PC-O	Positive	M+H	798.637	4.9	PC O-18:0/18:1-d9	0.134189	0.0269	0.00895	0.0206	0.0181	0.0255	0.0169	0.00558	0.00565	0.00955	0.0157	0.0136	0.00901	0.0129	0.0103	0.014	0.0145	0.00804	0.0111	0.017	0.0148	0.0183	0.00515	0.015	0.012	0.0146	0.0175	0.00145	0.0119	0.0133	0.0132	0.0132	0.00815	0.0128	0.0115	0.015
PE 32:0	PE	Negative	M-H	690.508	4.82	PE 15:0/18:1-d7	0.0931058	0.212	0.233	0.2	0.215	0.227	0.213	0.193	0.185	0.242	0.163	0.192	0.188	0.195	0.196	0.175	0.137	0.147	0.134	0.113	0.105	0.197	0.166	0.178	0.191	0.182	0.211	0.212	0.128	0.183	0.195	0.152	0.178	0.129	0.138	0.141
PE 32:1	PE	Negative	M-H	688.492	4.42	PE 15:0/18:1-d7	0.1362	0.041	0.0119	0.0486	0.0119	0.0501	0.0345	0.0465	0.058	0.039	0.0497	0.0486	0.0314	0.0353	0.0517	0.0474	0.0294	0.024	0.0306	0.0238	0.0333	0.0529	0.0264	0.0484	0.0285	0.0572	0.0538	0.0283	0.0416	0.0455	0.0381	0.0326	0.0295	0.0349	0.0288	0.0391
PE 34:1	PE	Negative	M-H	716.524	4.9	PE 15:0/18:1-d7	0.0752354	1.79	1.56	1.88	1.61	1.87	1.7	1.71	1.62	1.62	1.73	1.77	1.53	1.73	1.74	1.64	1.38	1.19	1.22	1.1	1.17	1.83	1.54	1.59	1.61	1.85	1.87	1.42	1.34	1.7	1.68	1.35	1.09	1.16	1.32	1.48
PE 34:2	PE	Negative	M-H	714.508	4.51	PE 15:0/18:1-d7	0.0989535	1.05	0.764	0.947	0.732	1.47	0.901	0.683	0.754	0.766	1.18	0.867	0.643	0.924	0.952	1.13	0.762	0.611	0.782	0.715	0.988	0.885	0.768	0.959	0.766	1.17	0.851	0.495	0.737	0.919	1.13	0.721	0.626	0.682	0.634	1.1
PE 36:1	PE	Negative	M-H	744.555	5.41	PE 15:0/18:1-d7	0.0728972	2.32	1.74	2.02	1.67	2.58	2.21	1.66	1.92	1.93	1.94	2.27	1.86	2.01	1.99	2.1	2	1.41	1.49	1.35	1.57	2.28	1.76	1.94	1.81	2.23	2.27	1.42	1.6	2.07	2.11	1.68	1.26	1.41	1.38	1.91
PE 36:2	PE	Negative	M-H	742.539	4.99	PE 15:0/18:1-d7	0.113078	3.8	2.87	3.61	2.71	4.79	3.25	2.45	2.71	2.92	4.26	3.39	2.71	3.31	3.28	3.75	2.66	2.17	2.92	2.55	3.1	3.41	2.74	2.96	2.81	4.04	3.21	1.95	2.67	3.27	3.75	2.69	2.32	2.41	2.44	4.29
PE 36:3	PE	Negative	M-H	740.524	4.59	PE 15:0/18:1-d7	0.129647	1.09	0.844	1.14	0.816	1.38	0.802	0.752	0.76	0.751	1.28	0.871	0.606	0.833	0.808	1.28	0.741	0.582	0.91	0.933	1.28	0.825	0.748	1.04	0.736	1.12	0.905	0.498	0.767	1.02	1.35	0.775	0.617	0.743	0.542	1.29
PE 38:2	PE	Negative	M-H	770.571	5.52	PE 15:0/18:1-d7	0.0856834	0.291	0.201	0.284	0.173	0.393	0.258	0.197	0.26	0.231	0.345	0.338	0.216	0.282	0.235	0.379	0.285	0.151	0.223	0.18	0.272	0.292	0.204	0.278	0.224	0.341	0.29	0.155	0.215	0.245	0.35	0.235	0.172	0.197	0.187	0.372
PE O-16:1_16:0	PE-O	Negative	M-H	674.513	5.15	PE 15:0/18:1-d7	0.200645	0.0932	0.0713	0.0672	0.0817	0.126	0.0836	0.0927	0.0701	0.105	0.125	0.0956	0.0686	0.0686	0.109	0.103	0.0966	0.0793	0.0804	0.0927	0.0985	0.113	0.0837	0.0874	0.0885	0.1	0.114	0.0769	0.0639	0.118	0.124	0.079	0.0754	0.0658	0.0832	0.118
PE O-16:1_18:1	PE-O	Negative	M-H	700.529	5.26	PE 15:0/18:1-d7	0.158076	0.755	0.58	0.591	0.535	0.921	0.71	0.622	0.52	0.74	0.947	0.923	0.612	0.779	0.854	0.957	0.758	0.52	0.667	0.734	0.809	0.847	0.703	0.713	0.705	0.865	0.858	0.387	0.607	1.01	0.93	0.646	0.533	0.508	0.655	1.01
PE O-16:1_18:2	PE-O	Negative	M-H	698.513	4.8	PE 15:0/18:1-d7	0.173513	0.57	0.329	0.375	0.269	0.597	0.471	0.275	0.213	0.448	0.542	0.564	0.327	0.376	0.493	0.654	0.408	0.285	0.43	0.509	0.549	0.487	0.348	0.371	0.382	0.466	0.535	0.181	0.288	0.525	0.568	0.452	0.328	0.308	0.383	0.722
PE O-18:1_16:0	PE-O	Negative	M-H	702.544	5.67	PE 15:0/18:1-d7	0.169359	0.0961	0.0414	0.0376	0.0589	0.132	0.114	0.0627	0.054	0.107	0.138	0.112	0.0513	0.0827	0.104	0.115	0.0983	0.0884	0.0698	0.0802	0.101	0.113	0.054	0.084	0.102	0.0918	0.118	0.0424	0.0478	0.125	0.12	0.0886	0.0722	0.0532	0.0856	0.135
PE O-18:1_18:1	PE-O	Negative	M-H	728.56	5.77	PE 15:0/18:1-d7	0.182056	0.309	0.18	0.25	0.143	0.367	0.305	0.198	0.138	0.258	0.315	0.333	0.186	0.265	0.31	0.299	0.277	0.147	0.224	0.253	0.297	0.382	0.203	0.299	0.249	0.347	0.368	0.0823	0.204	0.333	0.302	0.258	0.163	0.189	0.226	0.379
PE O-18:1_18:2	PE-O	Negative	M-H	726.544	5.32	PE 15:0/18:1-d7	0.188625	0.79	0.381	0.473	0.402	0.983	0.626	0.445	0.328	0.625	0.817	0.795	0.443	0.646	0.802	0.791	0.682	0.392	0.574	0.738	0.899	0.691	0.52	0.576	0.503	0.722	0.679	0.212	0.524	0.828	0.858	0.606	0.492	0.484	0.521	1.13
PE O-18:2_18:2	PE-O	Negative	M-H	724.529	4.89	PE 15:0/18:1-d7	0.295876	0.581	0.263	0.327	0.251	0.558	0.441	0.244	0.163	0.343	0.497	0.476	0.265	0.262	0.442	0.533	0.463	0.252	0.402	0.598	0.615	0.479	0.315	0.324	0.31	0.395	0.495	0.129	0.271	0.531	0.484	0.429	0.287	0.298	0.29	0.809
PG 32:0	PG	Negative	M-H	721.503	4.07	PG 15:0/18:1-d7	0.121007	0.101	0.0714	0.0787	0.118	0.0945	0.0836	0.0889	0.0864	0.101	0.107	0.089	0.0776	0.0841	0.0869	0.0849	0.0648	0.0631	0.0531	0.0365	0.0725	0.0651	0.0691	0.0744	0.0938	0.117	0.0869	0.0844	0.064	0.0741	0.091	0.0533	0.0557	0.0541	0.0655	0.065
PI 34:2	PI	Negative	M-H	833.519	3.83	PI 15:0/18:1-d7	0.0874817	1.04	0.48	0.635	0.7	0.938	0.621	0.56	0.457	0.607	0.722	0.779	0.506	0.415	0.607	0.888	0.653	0.467	0.513	0.751	0.771	0.758	0.64	0.557	0.536	0.748	0.783	0.44	0.635	0.693	0.969	0.619	0.343	0.417	0.487	0.742
PI 35:2	PI	Negative	M-H	847.534	4.01	PI 15:0/18:1-d7	0.197853	0.0799	0.0295	0.0348	0.0288	0.0809	0.0495	0.0109	0.0109	0.0446	0.059	0.0661	0.0263	0.0218	0.0305	0.0579	0.0477	0.0109	0.0254	0.0358	0.047	0.0546	0.0109	0.0285	0.0223	0.0639	0.0544	0.0109	0.0109	0.0385	0.0925	0.0293	0.0327	0.0226	0.0262	0.0491
PI 36:1	PI	Negative	M-H	863.566	4.54	PI 15:0/18:1-d7	0.131968	0.677	0.337	0.423	0.426	0.493	0.513	0.372	0.379	0.402	0.498	0.562	0.261	0.328	0.326	0.448	0.428	0.223	0.255	0.174	0.268	0.549	0.365	0.331	0.331	0.5	0.589	0.367	0.372	0.338	0.515	0.397	0.203	0.235	0.214	0.249
PI 36:2	PI	Negative	M-H	861.55	4.21	PI 15:0/18:1-d7	0.0726227	5.93	3.41	4.22	4.22	6.23	4.81	3.27	3.03	3.81	5.07	4.9	3.16	2.77	3.71	4.88	4.26	2.52	2.67	2.62	3.54	4.76	4.02	3.47	3.57	5.01	5.31	3.11	3.75	4.06	6.14	3.75	2.55	2.78	2.74	3.71
PI 36:3	PI	Negative	M-H	859.534	3.93	PI 15:0/18:1-d7	0.170817	1.65	0.611	0.86	0.623	1.43	0.948	0.568	0.445	0.424	1.05	1.23	0.467	0.607	0.569	1.27	1.03	0.483	0.725	0.828	1.2	1.12	0.559	0.599	0.52	1	1.16	0.346	0.662	0.686	1.31	0.999	0.438	0.641	0.398	1.31
PI 38:3	PI	Negative	M-H	887.566	4.31	PI 15:0/18:1-d7	0.128629	1.39	0.587	1.2	0.801	1.38	0.854	0.628	0.793	0.84	1.16	0.992	0.51	0.938	0.952	1.13	0.762	0.504	0.984	0.734	0.967	1.07	0.858	1.08	0.893	1.27	0.967	0.447	1.19	1.02	1.47	0.704	0.519	0.872	0.703	0.895
PI 38:4	PI	Negative	M-H	885.55	4.17	PI 15:0/18:1-d7	0.180189	36.9	15.3	21.8	17.5	30.8	22.6	15.2	10.3	18.3	23.5	28	13.3	14.6	25.8	28	26.6	13	20.7	26.4	27.9	25.8	19	16.7	18.7	22.3	28.9	8.37	21.9	25.6	34.5	21	13.6	16.5	17.9	29.3
PS 34:1	PS	Negative	M-H	760.513	4.17	PS 15:0/18:1-d7	0.164248	0.57	0.368	0.427	0.528	0.608	0.523	0.347	0.455	0.576	0.459	0.558	0.51	0.479	0.606	0.434	0.432	0.295	0.374	0.381	0.301	0.526	0.37	0.418	0.552	0.484	0.594	0.373	0.405	0.507	0.52	0.309	0.307	0.329	0.343	0.367
PS 36:1	PS	Negative	M-H	788.545	4.59	PS 15:0/18:1-d7	0.135147	11.7	5.78	8.01	7.3	9.46	9.47	5.68	7.23	7.76	8.61	9.98	6.74	7.49	7.51	8.06	7.12	5.2	4.76	6.06	5.92	7.51	6.15	7.31	8.36	7.89	9.17	5.95	6.85	6.61	8.77	6.41	4.41	4.64	5.76	6.25
PS 36:2	PS	Negative	M-H	786.529	4.27	PS 15:0/18:1-d7	0.128843	3.42	1.55	2.39	2.1	3.01	2.51	1.61	1.85	1.99	2.52	3.24	1.67	2.3	2.23	2.62	2.21	1.65	1.71	2.11	2.01	2.7	1.88	2.07	1.96	2.63	2.42	1.38	2.19	2.21	2.88	1.93	1.33	1.56	1.58	2.24
PS 38:2	PS	Negative	M-H	814.56	4.71	PS 15:0/18:1-d7	0.208925	0.531	0.178	0.376	0.231	0.559	0.459	0.248	0.283	0.273	0.264	0.494	0.346	0.463	0.19	0.296	0.324	0.238	0.209	0.304	0.287	0.377	0.21	0.343	0.336	0.457	0.372	0.189	0.227	0.315	0.391	0.262	0.193	0.151	0.224	0.297
PS 38:3	PS	Negative	M-H	812.545	4.39	PS 15:0/18:1-d7	0.220985	2.21	0.672	1.17	0.978	1.78	1.39	0.896	0.571	0.932	1.48	1.9	0.848	1.29	1.46	1.49	1.5	0.873	1.15	1.44	1.11	1.43	1.04	1.17	1.18	1.56	1.42	0.412	1.14	1.57	1.77	1.15	0.696	0.937	1.1	1.2
PS 38:4	PS	Negative	M-H	810.529	4.22	PS 15:0/18:1-d7	0.285744	10.5	3.76	4.71	4.39	7.28	5.36	3.39	2.61	4.81	5.1	8.1	3.48	4.18	7.37	7.09	6.81	4.64	5.56	10.3	8.39	6.23	4.11	4.16	5.16	4.98	6.64	1.69	4.76	7.04	6.81	5.05	3.62	3.81	6.31	8.87
PS 40:4	PS	Negative	M-H	838.56	4.5	PS 15:0/18:1-d7	0.297317	2.97	0.812	1.14	0.985	2.03	1.46	0.788	0.54	1.19	2.01	2.35	0.691	0.874	1.31	1.98	1.77	0.94	1.45	2.53	2.3	1.82	0.967	1.04	1.14	1.55	1.74	0.362	1.27	1.55	2.3	1.52	0.71	0.931	1.23	2.3
SM 32:1;O2	SM	Positive	M+H	675.544	3.86	SM d18:1/18:1-d9	0.198348	0.0145	0.0128	0.016	0.0163	0.0131	0.0136	0.0144	0.0167	0.016	0.0154	0.0171	0.0158	0.0173	0.0138	0.0115	0.0133	0.0133	0.00983	0.00925	0.00745	0.0108	0.0129	0.0152	0.0147	0.0112	0.00926	0.00921	0.00924	0.015	0.0108	0.0079	0.00678	0.00862	0.008	0.00932
SM 33:1;O2	SM	Positive	M+H	689.559	4.06	SM d18:1/18:1-d9	0.0907711	0.0505	0.0499	0.0476	0.0571	0.0438	0.0439	0.0407	0.0533	0.0532	0.0482	0.0537	0.0475	0.0391	0.0443	0.0395	0.0441	0.0341	0.0336	0.0319	0.0248	0.0414	0.0399	0.0439	0.0478	0.041	0.0336	0.0343	0.0347	0.0413	0.0364	0.0266	0.0305	0.022	0.0243	0.0251
SM 34:0;O2	SM	Positive	M+H	705.591	4.45	SM d18:1/18:1-d9	0.120148	0.154	0.114	0.121	0.118	0.115	0.153	0.0941	0.118	0.116	0.137	0.153	0.104	0.134	0.105	0.115	0.101	0.0817	0.0804	0.07	0.0889	0.116	0.0985	0.113	0.1	0.134	0.114	0.0807	0.0825	0.104	0.117	0.0791	0.0646	0.0659	0.0656	0.0753
SM 34:1;O2	SM	Positive	M+H	703.575	4.25	SM d18:1/18:1-d9	0.0998792	2.32	1.83	1.79	1.93	2.03	2.23	1.46	2.06	1.81	2.07	2.86	1.51	1.83	1.7	1.7	1.72	1.3	1.41	1.26	1.27	2.04	1.52	1.89	1.59	1.86	1.96	1.22	1.41	1.68	1.67	1.29	1.13	1.05	1.16	1.34
SM 34:1;O3	SM	Positive	M+H	719.57	4.08	SM d18:1/18:1-d9	0.13526	0.0275	0.0229	0.0217	0.026	0.0332	0.0207	0.0214	0.0264	0.0234	0.0281	0.0277	0.0229	0.0246	0.0214	0.023	0.0311	0.0152	0.0146	0.0101	0.0187	0.0198	0.021	0.0236	0.0228	0.0217	0.0189	0.0159	0.0187	0.019	0.0236	0.0155	0.0143	0.0164	0.0126	0.0146
SM 34:2;O2	SM	Positive	M+H	701.559	3.93	SM d18:1/18:1-d9	0.119722	0.151	0.145	0.134	0.173	0.127	0.138	0.136	0.146	0.166	0.165	0.189	0.15	0.153	0.134	0.12	0.122	0.133	0.0913	0.105	0.0898	0.123	0.14	0.146	0.151	0.121	0.0977	0.11	0.0968	0.132	0.104	0.0874	0.0807	0.0719	0.0826	0.0862
SM 35:1;O2	SM	Positive	M+H	717.591	4.48	SM d18:1/18:1-d9	0.105072	0.0566	0.0414	0.0432	0.0479	0.0425	0.0527	0.0393	0.0392	0.0451	0.0475	0.061	0.0372	0.0425	0.0367	0.0399	0.0448	0.0286	0.0258	0.0297	0.0281	0.0457	0.0367	0.0456	0.0373	0.0422	0.0454	0.0284	0.0331	0.0391	0.0404	0.0318	0.0265	0.0221	0.026	0.0307
SM 36:0;O2	SM	Positive	M+H	733.622	4.92	SM d18:1/18:1-d9	0.0805312	0.025	0.0166	0.0164	0.0248	0.0203	0.0206	0.017	0.0189	0.0207	0.0225	0.0275	0.0184	0.0183	0.0195	0.0186	0.0177	0.0144	0.0127	0.0125	0.0152	0.0207	0.0198	0.0173	0.0189	0.0218	0.0177	0.0163	0.0152	0.0202	0.0213	0.0122	0.0124	0.0117	0.0134	0.014
SM 36:1;O2	SM	Positive	M+H	731.606	4.73	SM d18:1/18:1-d9	0.104074	1.31	0.796	0.783	0.985	0.932	1.06	0.812	0.759	0.766	1.02	1.33	0.837	0.852	0.8	0.807	0.846	0.59	0.625	0.613	0.512	1.09	0.858	0.696	0.899	0.967	0.958	0.545	0.683	0.857	0.783	0.661	0.6	0.575	0.585	0.537
SM 36:2;O2	SM	Positive	M+H	729.591	4.36	SM d18:1/18:1-d9	0.0593363	0.152	0.113	0.102	0.133	0.115	0.135	0.108	0.107	0.113	0.11	0.149	0.102	0.0986	0.112	0.103	0.107	0.0792	0.0806	0.0838	0.0807	0.126	0.0984	0.105	0.106	0.111	0.115	0.0817	0.08	0.101	0.104	0.0795	0.0596	0.0581	0.072	0.0696
SM 37:1;O2	SM	Positive	M+H	745.622	5.03	SM d18:1/18:1-d9	0.085791	0.156	0.102	0.118	0.14	0.131	0.14	0.097	0.122	0.106	0.153	0.177	0.106	0.129	0.101	0.108	0.115	0.0839	0.0889	0.0775	0.0849	0.143	0.117	0.106	0.11	0.131	0.117	0.0929	0.0948	0.106	0.111	0.0959	0.0766	0.0756	0.0714	0.0964
SM 37:2;O2	SM	Positive	M+H	743.606	4.59	SM d18:1/18:1-d9	0.183242	0.0235	0.0154	0.0188	0.018	0.0206	0.02	0.0159	0.0172	0.0203	0.0234	0.0323	0.0166	0.015	0.0191	0.0198	0.0198	0.0164	0.0151	0.012	0.0123	0.018	0.0154	0.0149	0.0177	0.0153	0.0213	0.0124	0.0171	0.0167	0.017	0.0199	0.0103	0.0105	0.00904	0.0135
SM 38:0;O2	SM	Positive	M+H	761.653	5.51	SM d18:1/18:1-d9	0.175991	0.013	0.000307	0.00849	0.0113	0.0102	0.0117	0.00954	0.0112	0.0109	0.0117	0.013	0.0104	0.011	0.0107	0.00874	0.0089	0.00766	0.00759	0.00628	0.00832	0.0109	0.0106	0.0108	0.0102	0.0103	0.00871	0.00937	0.0083	0.00964	0.0103	0.00852	0.00633	0.00603	0.00563	0.00872
SM 38:1;O2	SM	Positive	M+H	759.637	5.32	SM d18:1/18:1-d9	0.117805	1.29	0.781	0.968	1.16	1.06	1.3	0.921	1.1	0.909	1.26	1.4	0.884	1.05	0.801	0.88	0.936	0.706	0.77	0.67	0.658	1.13	0.93	1.01	1.01	1.07	0.889	0.817	0.969	0.928	1.03	0.887	0.645	0.653	0.652	0.8
SM 38:2;O2	SM	Positive	M+H	757.622	4.86	SM d18:1/18:1-d9	0.0838063	0.421	0.288	0.387	0.366	0.368	0.379	0.267	0.379	0.356	0.42	0.449	0.262	0.345	0.31	0.329	0.3	0.213	0.296	0.257	0.241	0.355	0.285	0.34	0.305	0.343	0.352	0.223	0.301	0.305	0.328	0.247	0.22	0.244	0.213	0.273
SM 39:1;O2	SM	Positive	M+H	773.653	5.6	SM d18:1/18:1-d9	0.10447	0.411	0.259	0.3	0.327	0.257	0.38	0.244	0.311	0.279	0.325	0.467	0.278	0.29	0.248	0.245	0.31	0.194	0.204	0.181	0.185	0.371	0.269	0.275	0.291	0.288	0.337	0.246	0.242	0.264	0.271	0.273	0.197	0.187	0.18	0.202
SM 39:2;O2	SM	Positive	M+H	771.637	5.12	SM d18:1/18:1-d9	0.0654883	0.124	0.0817	0.0871	0.0893	0.0894	0.126	0.0759	0.0926	0.0795	0.103	0.139	0.0737	0.097	0.078	0.0763	0.103	0.06	0.0657	0.0567	0.0564	0.116	0.0806	0.0852	0.0914	0.0904	0.0992	0.0593	0.0738	0.0925	0.0893	0.0875	0.0503	0.0571	0.0603	0.0679
SM 40:0;O2	SM	Positive	M+H	789.684	6.03	SM d18:1/18:1-d9	0.150141	0.0161	0.0139	0.0141	0.0205	0.0144	0.0181	0.0114	0.0128	0.0158	0.0163	0.0191	0.0129	0.0124	0.012	0.0116	0.0117	0.0101	0.00989	0.00737	0.00853	0.0128	0.0148	0.0124	0.0144	0.014	0.0126	0.00946	0.00969	0.013	0.0153	0.0107	0.011	0.00869	0.00766	0.00952
SM 40:1;O2	SM	Positive	M+H	787.669	5.82	SM d18:1/18:1-d9	0.144106	1.72	1.15	1.38	1.79	1.39	1.69	1.22	1.47	1.32	1.62	1.95	1.26	1.34	1.19	1.25	1.24	0.977	0.937	0.808	0.904	1.69	1.35	1.29	1.36	1.26	1.45	1.11	1.21	1.35	1.25	1.21	0.917	0.857	0.94	0.97
SM 40:2;O2	SM	Positive	M+H	785.653	5.37	SM d18:1/18:1-d9	0.0928576	0.532	0.39	0.476	0.484	0.46	0.514	0.39	0.487	0.425	0.548	0.575	0.427	0.487	0.398	0.38	0.411	0.314	0.324	0.305	0.296	0.485	0.433	0.455	0.463	0.425	0.422	0.327	0.373	0.42	0.444	0.387	0.301	0.289	0.308	0.315
SM 40:3;O2	SM	Positive	M+H	783.637	4.86	SM d18:1/18:1-d9	0.086643	0.0107	0.00926	0.0108	0.0103	0.0119	0.0101	0.00745	0.00915	0.00958	0.00965	0.0137	0.00823	0.00881	0.0103	0.00878	0.0088	0.00756	0.00822	0.00766	0.00795	0.0105	0.00756	0.0095	0.00759	0.00909	0.0097	0.00509	0.00687	0.0115	0.00858	0.00667	0.0061	0.00662	0.006	0.00602
SM 41:1;O2	SM	Positive	M+H	801.684	6.12	SM d18:1/18:1-d9	0.112184	0.438	0.289	0.327	0.339	0.327	0.401	0.27	0.326	0.342	0.383	0.493	0.306	0.307	0.267	0.262	0.31	0.226	0.207	0.182	0.194	0.36	0.307	0.312	0.29	0.328	0.315	0.258	0.274	0.287	0.312	0.289	0.224	0.199	0.206	0.21
SM 41:2;O2	SM	Positive	M+H	799.669	5.67	SM d18:1/18:1-d9	0.0990465	0.162	0.12	0.15	0.145	0.131	0.163	0.129	0.158	0.128	0.156	0.205	0.139	0.17	0.127	0.112	0.128	0.101	0.105	0.0987	0.0906	0.165	0.128	0.128	0.139	0.147	0.15	0.113	0.117	0.135	0.14	0.12	0.0977	0.088	0.0885	0.0979
SM 41:3;O2	SM	Positive	M+H	797.653	5.12	SM d18:1/18:1-d9	0.194072	0.0039	0.00104	0.000649	0.00278	0.00202	0.00412	0.0013	0.00246	0.000409	0.00241	0.00331	0.00167	0.00383	0.00302	0.00146	0.00374	0.00253	0.00153	0.00266	0.000979	0.00252	0.00178	0.00214	0.00218	0.00205	0.00112	0.000693	0.00214	0.00274	0.00282	0.00196	0.00154	0.00143	0.00199	0.00279
SM 42:0;O2	SM	Positive	M+H	817.716	6.65	SM d18:1/18:1-d9	0.178764	0.00318	0.00297	0.00242	0.003	0.00449	0.00433	0.00508	0.00404	0.00504	0.00484	0.00517	0.000309	0.00281	0.00381	0.00466	0.00457	0.00222	0.00291	0.00257	0.00214	0.00382	0.00365	0.00569	0.00394	0.00414	0.00421	0.00251	0.00368	0.00349	0.00593	0.00343	0.00093	0.0024	0.00245	0.00162
SM 42:1;O2	SM	Positive	M+H	815.7	6.43	SM d18:1/18:1-d9	0.129562	0.559	0.537	0.498	0.689	0.468	0.498	0.517	0.583	0.573	0.568	0.515	0.503	0.544	0.482	0.396	0.43	0.385	0.365	0.339	0.328	0.462	0.6	0.545	0.618	0.496	0.43	0.52	0.503	0.505	0.459	0.341	0.437	0.326	0.379	0.331
SM 42:2;O2	SM	Positive	M+H	813.684	5.84	SM d18:1/18:1-d9	0.131463	1.12	0.954	1.09	1.38	1.04	1.12	1	1.14	1.13	1.18	1.35	1.06	1.05	0.983	0.929	0.835	0.798	0.745	0.699	0.669	1.11	1.13	1.06	1.13	0.905	0.962	0.904	0.957	1.11	0.901	0.793	0.773	0.665	0.794	0.732
SM 42:3;O2	SM	Positive	M+H	811.669	5.37	SM d18:1/18:1-d9	0.0872691	0.204	0.209	0.207	0.231	0.188	0.187	0.198	0.203	0.218	0.23	0.22	0.214	0.209	0.198	0.167	0.158	0.169	0.146	0.163	0.13	0.184	0.214	0.211	0.223	0.174	0.158	0.17	0.165	0.206	0.187	0.138	0.171	0.13	0.147	0.136
SM 43:1;O2	SM	Positive	M+H	829.716	6.64	SM d18:1/18:1-d9	0.112958	0.0191	0.0128	0.0188	0.0177	0.0137	0.016	0.0157	0.0175	0.0159	0.0162	0.0217	0.0141	0.0155	0.0154	0.0139	0.0129	0.0127	0.0114	0.0088	0.00864	0.018	0.0123	0.0138	0.0171	0.0146	0.016	0.0131	0.0128	0.0164	0.0109	0.0114	0.00942	0.0101	0.0111	0.00945
SM 43:2;O2	SM	Positive	M+H	827.7	6.05	SM d18:1/18:1-d9	0.139209	0.0131	0.00899	0.0111	0.00945	0.0101	0.012	0.00819	0.0101	0.0124	0.0124	0.0137	0.0108	0.00739	0.00899	0.00881	0.011	0.00777	0.00778	0.00682	0.00568	0.0115	0.00857	0.0133	0.01	0.00872	0.0105	0.00535	0.00979	0.00881	0.00861	0.00755	0.00818	0.00608	0.00517	0.00648
TG 46:2	TG	Positive	M+NH4	792.708	8.44	TG 14:0/16:1/14:0-d5	0.197032	0.0335	0.014	0.0211	0.0106	0.0356	0.0227	0.0269	0.0189	0.0153	0.0179	0.0243	0.004825	0.0162	0.0173	0.018	0.0194	0.01	0.0232	0.0114	0.0191	0.0214	0.0116	0.0169	0.0123	0.0213	0.025	0.00965	0.0141	0.0185	0.0211	0.0201	0.0186	0.028	0.0138	0.0168
TG 48:0	TG	Positive	M+NH4	824.77	9.53	TG 15:0/18:1-d7/15:0	0.183262	0.178	0.0896	0.164	0.106	0.169	0.156	0.114	0.159	0.123	0.208	0.19	0.103	0.14	0.102	0.188	0.124	0.0775	0.122	0.0776	0.149	0.147	0.103	0.161	0.121	0.183	0.155	0.116	0.131	0.129	0.184	0.108	0.106	0.14	0.0915	0.115
TG 48:1	TG	Positive	M+NH4	822.755	9.2	TG 15:0/18:1-d7/15:0	0.123353	0.336	0.116	0.25	0.119	0.303	0.233	0.163	0.245	0.131	0.262	0.287	0.123	0.217	0.114	0.234	0.183	0.1	0.207	0.0905	0.184	0.247	0.116	0.23	0.132	0.247	0.267	0.107	0.218	0.185	0.271	0.177	0.111	0.216	0.107	0.177
TG 48:2	TG	Positive	M+NH4	820.739	8.86	TG 15:0/18:1-d7/15:0	0.146156	0.2	0.0726	0.174	0.0772	0.181	0.182	0.0877	0.131	0.0975	0.193	0.21	0.0663	0.139	0.0765	0.154	0.128	0.0566	0.149	0.0687	0.128	0.168	0.0715	0.152	0.0835	0.167	0.171	0.0576	0.13	0.121	0.157	0.12	0.0801	0.16	0.0717	0.102
TG 48:3	TG	Positive	M+NH4	818.723	8.48	TG 14:0/16:1/14:0-d5	0.147382	0.0589	0.0221	0.042	0.0201	0.0514	0.0389	0.0277	0.0278	0.0211	0.0318	0.0417	0.0159	0.0335	0.0243	0.0343	0.0382	0.0184	0.0395	0.0193	0.0385	0.0499	0.0248	0.0311	0.0208	0.0339	0.0449	0.0136	0.0263	0.0312	0.0384	0.0388	0.0247	0.0236	0.017	0.0305
TG 49:2	TG	Positive	M+NH4	834.755	9.05	TG 15:0/18:1-d7/15:0	0.155791	0.165	0.16	0.164	0.178	0.19	0.155	0.175	0.176	0.154	0.172	0.158	0.167	0.163	0.16	0.154	0.142	0.152	0.152	0.148	0.15	0.166	0.161	0.165	0.162	0.17	0.156	0.166	0.164	0.16	0.173	0.148	0.16	0.17	0.153	0.139
TG 50:0	TG	Positive	M+NH4	852.801	9.88	TG 20:0/20:1/20:0-d5	0.183154	0.0424	0.0216	0.026	0.0283	0.0404	0.0326	0.0298	0.0323	0.0222	0.0417	0.0402	0.0231	0.028	0.0214	0.0461	0.0356	0.0218	0.0247	0.0195	0.035	0.0322	0.024	0.0353	0.0219	0.0458	0.0346	0.0237	0.0302	0.0289	0.0299	0.028	0.0232	0.0229	0.0938	0.0415
TG 50:1	TG	Positive	M+NH4	850.786	9.57	TG 15:0/18:1-d7/15:0	0.11964	1.35	0.552	0.961	0.551	0.996	1.37	0.53	0.832	0.679	1.3	1.58	0.574	0.773	0.489	1.13	0.943	0.457	0.659	0.374	0.848	1.33	0.584	0.868	0.606	1.22	1.21	0.618	0.782	0.622	1.22	0.87	0.487	0.612	0.429	0.667
TG 50:2	TG	Positive	M+NH4	848.77	9.25	TG 15:0/18:1-d7/15:0	0.101678	1.66	0.479	1.14	0.47	1.03	1.32	0.563	0.882	0.594	1.34	1.45	0.513	0.871	0.446	1.03	0.792	0.442	0.785	0.341	0.799	1.3	0.566	0.975	0.523	0.993	1.32	0.473	0.9	0.619	1.09	0.856	0.414	0.796	0.397	0.677
TG 50:3	TG	Positive	M+NH4	846.755	8.9	TG 15:0/18:1-d7/15:0	0.10568	0.494	0.148	0.359	0.165	0.354	0.413	0.141	0.239	0.179	0.409	0.494	0.139	0.271	0.161	0.349	0.304	0.13	0.287	0.161	0.301	0.41	0.162	0.277	0.161	0.357	0.406	0.125	0.283	0.219	0.315	0.278	0.149	0.278	0.122	0.232
TG 50:4	TG	Positive	M+NH4	844.739	8.54	TG 14:0/16:1/14:0-d5	0.121937	0.108	0.0387	0.0484	0.0253	0.0719	0.0623	0.0319	0.0328	0.029	0.0463	0.0679	0.0314	0.0429	0.0352	0.0562	0.0611	0.032	0.0438	0.0312	0.0597	0.0798	0.0361	0.0457	0.0261	0.048	0.0721	0.0206	0.0399	0.0384	0.0538	0.0624	0.0311	0.0416	0.0227	0.0498
TG 51:1	TG	Positive	M+NH4	864.801	9.74	TG 15:0/18:1-d7/15:0	0.158339	0.0471	0.0123	0.0179	0.0136	0.0371	0.0427	0.0174	0.0156	0.0161	0.0264	0.041	0.0128	0.0137	0.0122	0.0259	0.0289	0.0105	0.0164	0.00771	0.0205	0.0362	0.0144	0.0174	0.013	0.0237	0.0325	0.0115	0.0152	0.0123	0.0221	0.0261	0.0135	0.0166	0.0116	0.0141
TG 51:2	TG	Positive	M+NH4	862.786	9.45	TG 15:0/18:1-d7/15:0	0.107715	0.142	0.0434	0.0608	0.0428	0.113	0.106	0.0544	0.0503	0.0494	0.0957	0.139	0.0389	0.0509	0.0403	0.0716	0.0887	0.0348	0.047	0.0314	0.0568	0.114	0.0487	0.0539	0.0508	0.0862	0.108	0.0426	0.0487	0.0462	0.077	0.0884	0.0428	0.0592	0.0342	0.054
TG 51:3	TG	Positive	M+NH4	860.77	9.11	TG 15:0/18:1-d7/15:0	0.140465	0.0672	0.00844	0.0193	0.00909	0.0478	0.0527	0.0115	0.0143	0.015	0.0318	0.0657	0.00985	0.0153	0.0076	0.0292	0.0408	0.00846	0.0143	0.013	0.0274	0.0503	0.015	0.0166	0.00988	0.0317	0.051	0.00778	0.0177	0.0148	0.0287	0.0428	0.0127	0.0194	0.0116	0.0245
TG 52:1	TG	Positive	M+NH4	878.817	9.91	TG 20:0/20:1/20:0-d5	0.118207	0.339	0.143	0.192	0.166	0.245	0.327	0.144	0.187	0.149	0.321	0.347	0.14	0.16	0.13	0.282	0.245	0.107	0.126	0.0849	0.19	0.314	0.141	0.197	0.136	0.331	0.299	0.161	0.163	0.164	0.265	0.186	0.134	0.138	0.0923	0.172
TG 52:2	TG	Positive	M+NH4	876.801	9.61	TG 15:0/18:1-d7/15:0	0.118837	4.5	2.05	2.99	1.84	3.24	5.21	1.74	2.41	2.05	4.01	5.72	1.89	2.29	1.78	3.65	3.03	1.59	1.86	1.31	2.64	4.45	2.01	2.62	1.88	3.49	3.97	1.9	2.19	2.01	3.4	3.41	1.66	1.69	1.3	2.07
TG 52:3	TG	Positive	M+NH4	874.786	9.29	TG 15:0/18:1-d7/15:0	0.0919047	5.63	1.61	2.63	1.44	2.57	4.24	1.61	1.84	1.79	3.72	4.7	1.65	2.03	1.36	2.75	2.85	1.44	2	1.1	2.35	4.05	1.83	2.3	1.36	2.82	4.22	1.3	2.05	1.57	2.9	2.99	1.36	1.81	1.18	2.11
TG 52:4	TG	Positive	M+NH4	872.77	8.95	TG 15:0/18:1-d7/15:0	0.108909	1.51	0.43	0.6	0.38	0.863	1.15	0.347	0.379	0.458	0.95	1.44	0.415	0.487	0.43	0.891	0.946	0.37	0.52	0.436	0.872	1.2	0.482	0.492	0.403	0.825	1.23	0.301	0.54	0.492	0.755	0.972	0.434	0.553	0.327	0.658
TG 53:1	TG	Positive	M+NH4	892.833	10.06	TG 20:0/20:1/20:0-d5	0.15198	0.0121	0.00445	0.00515	0.00583	0.0133	0.0105	0.00734	0.00586	0.00532	0.0106	0.0147	0.00313	0.00539	0.00387	0.00975	0.0101	0.00403	0.00483	0.00288	0.00771	0.0107	0.00546	0.00602	0.00305	0.00896	0.0115	0.00444	0.00366	0.00467	0.00735	0.00922	0.00477	0.00417	0.0154	0.00979
TG 53:2	TG	Positive	M+NH4	890.817	9.77	TG 20:0/20:1/20:0-d5	0.0912534	0.103	0.0336	0.0329	0.0287	0.0684	0.089	0.0305	0.0297	0.0285	0.0626	0.0968	0.0248	0.0289	0.0259	0.0629	0.0876	0.0256	0.0282	0.021	0.0528	0.0759	0.0373	0.037	0.0241	0.0587	0.0907	0.0243	0.0332	0.0297	0.045	0.0723	0.0232	0.0253	0.0885	0.0725
TG 53:3	TG	Positive	M+NH4	888.801	9.47	TG 15:0/18:1-d7/15:0	0.0767235	0.2	0.0658	0.0824	0.0603	0.133	0.162	0.0624	0.0721	0.0746	0.148	0.203	0.0627	0.0653	0.0635	0.122	0.129	0.0567	0.0602	0.0488	0.0975	0.164	0.0699	0.0796	0.0714	0.125	0.168	0.0603	0.0679	0.0684	0.114	0.129	0.0624	0.066	0.0455	0.0873
TG 53:4	TG	Positive	M+NH4	886.786	9.1	TG 15:0/18:1-d7/15:0	0.129119	0.0767	0.0197	0.0225	0.0175	0.0452	0.0545	0.0183	0.0159	0.0184	0.0464	0.068	0.0182	0.0222	0.0178	0.0315	0.0521	0.0186	0.0199	0.0172	0.0346	0.0649	0.0236	0.0209	0.015	0.0395	0.062	0.0142	0.0225	0.0219	0.0401	0.0504	0.0195	0.02	0.0143	0.0306
TG 54:1	TG	Positive	M+NH4	906.848	10.23	TG 20:0/20:1/20:0-d5	0.124758	0.0537	0.0234	0.0212	0.0243	0.0483	0.0466	0.0327	0.0255	0.0231	0.0479	0.0563	0.0203	0.0224	0.0248	0.048	0.0417	0.0218	0.0204	0.0161	0.0388	0.0445	0.0239	0.0271	0.0206	0.0454	0.0483	0.0254	0.0272	0.0229	0.0333	0.036	0.0202	0.0206	0.0775	0.0469
TG 54:2	TG	Positive	M+NH4	904.833	9.95	TG 20:0/20:1/20:0-d5	0.07519	0.809	0.365	0.372	0.415	0.564	0.711	0.362	0.384	0.351	0.652	0.838	0.329	0.338	0.302	0.769	0.737	0.29	0.279	0.255	0.507	0.743	0.355	0.422	0.296	0.715	0.896	0.314	0.373	0.373	0.576	0.576	0.282	0.323	1.07	0.784
TG 54:3	TG	Positive	M+NH4	902.817	9.67	TG 15:0/18:1-d7/15:0	0.124659	5.75	2.39	3.25	2.35	3.64	6.84	1.89	2.45	2.51	4.67	7.66	2.26	2.55	2.11	3.88	4	1.93	2.19	1.8	3.26	6.03	2.56	3.06	2.3	3.57	5.08	2.09	2.76	2.53	3.6	3.93	2.09	2.04	1.6	2.45
TG 54:4	TG	Positive	M+NH4	900.801	9.33	TG 15:0/18:1-d7/15:0	0.0951032	8.12	2.53	3.03	2.42	3.64	5.73	2.28	2.28	2.63	4.52	6.98	2.39	2.4	2.41	4.14	5.36	2.02	2.35	2.13	3.56	5.93	2.71	2.69	2.63	3.78	6.33	1.85	2.54	2.68	3.85	4.8	2.17	2.14	2.04	3.14
TG 54:5	TG	Positive	M+NH4	898.786	9.05	TG 15:0/18:1-d7/15:0	0.12391	3.58	1.03	1	0.92	1.55	2.75	0.84	0.654	1.11	1.99	3.18	1.01	0.865	1.21	1.78	2.18	0.904	0.987	1.2	1.81	2.87	1.17	0.946	1.07	1.62	2.77	0.655	0.92	1.33	1.65	2.41	1.03	0.993	0.905	1.52
TG 54:6	TG	Positive	M+NH4	896.77	8.76	TG 14:0/16:1/14:0-d5	0.175539	0.862	0.349	0.242	0.203	0.454	0.563	0.252	0.142	0.262	0.36	0.592	0.277	0.227	0.378	0.419	0.524	0.26	0.26	0.341	0.449	0.74	0.304	0.233	0.204	0.355	0.659	0.16	0.238	0.354	0.349	0.601	0.268	0.241	0.197	0.357
TG 55:2	TG	Positive	M+NH4	918.848	10.1	TG 20:0/20:1/20:0-d5	0.134354	0.0377	0.0138	0.0149	0.0165	0.0313	0.0324	0.0191	0.0194	0.0149	0.0267	0.042	0.0124	0.015	0.0127	0.031	0.0317	0.0106	0.0134	0.0107	0.023	0.0316	0.0173	0.0194	0.0136	0.0276	0.0326	0.0144	0.0149	0.0153	0.022	0.0282	0.0131	0.0114	0.0503	0.035
TG 55:3	TG	Positive	M+NH4	916.833	9.82	TG 20:0/20:1/20:0-d5	0.124043	0.0814	0.0319	0.0329	0.031	0.0609	0.076	0.0307	0.0301	0.0321	0.0588	0.0844	0.0235	0.0288	0.03	0.0652	0.0713	0.0254	0.0281	0.0257	0.0559	0.0636	0.0343	0.0357	0.0268	0.0602	0.0791	0.0223	0.0374	0.0359	0.0451	0.0646	0.0228	0.027	0.106	0.0744
TG 55:4	TG	Positive	M+NH4	914.817	9.53	TG 15:0/18:1-d7/15:0	0.0730477	0.107	0.0424	0.0547	0.0419	0.0789	0.0889	0.0361	0.0427	0.0536	0.0977	0.113	0.0377	0.0403	0.0505	0.084	0.0754	0.0371	0.037	0.0394	0.0661	0.0911	0.0463	0.0472	0.05	0.073	0.0903	0.0301	0.0424	0.0472	0.0745	0.0752	0.0424	0.0406	0.0354	0.0615
TG 56:1	TG	Positive	M+NH4	934.88	10.52	TG 20:0/20:1/20:0-d5	0.136013	0.018	0.00753	0.00736	0.00772	0.0139	0.0134	0.0122	0.0073	0.00725	0.0121	0.0141	0.00588	0.0061	0.00661	0.0146	0.0133	0.00678	0.00723	0.00692	0.011	0.0147	0.00814	0.00745	0.00697	0.0131	0.0128	0.00793	0.00845	0.00683	0.0105	0.0113	0.00715	0.00685	0.0198	0.0164
TG 56:2	TG	Positive	M+NH4	932.864	10.26	TG 20:0/20:1/20:0-d5	0.0780674	0.138	0.0579	0.0624	0.0665	0.118	0.121	0.0711	0.0685	0.0613	0.133	0.14	0.051	0.0604	0.0606	0.124	0.106	0.05	0.0524	0.0445	0.107	0.121	0.064	0.076	0.055	0.117	0.125	0.0582	0.0759	0.0616	0.093	0.0914	0.0462	0.049	0.195	0.131
TG 56:3	TG	Positive	M+NH4	930.848	9.98	TG 20:0/20:1/20:0-d5	0.0693684	0.64	0.294	0.318	0.323	0.498	0.553	0.279	0.327	0.314	0.58	0.663	0.28	0.309	0.275	0.703	0.559	0.232	0.242	0.236	0.478	0.629	0.283	0.355	0.27	0.582	0.699	0.229	0.348	0.296	0.525	0.483	0.222	0.267	0.977	0.72
TG 56:4	TG	Positive	M+NH4	928.833	9.69	TG 15:0/18:1-d7/15:0	0.113199	0.987	0.44	0.573	0.419	0.715	1.03	0.322	0.382	0.478	0.872	1.12	0.414	0.439	0.439	0.763	0.681	0.357	0.437	0.382	0.715	0.976	0.478	0.532	0.42	0.68	0.816	0.305	0.526	0.483	0.673	0.632	0.386	0.387	0.325	0.534
TG 56:6	TG	Positive	M+NH4	924.801	9.2	TG 15:0/18:1-d7/15:0	0.13008	1.64	0.525	0.578	0.461	0.793	1.22	0.433	0.382	0.615	0.88	1.33	0.54	0.545	0.708	0.824	1.04	0.477	0.619	0.721	0.853	1.31	0.569	0.545	0.537	0.66	1.26	0.299	0.616	0.674	0.697	1.19	0.491	0.607	0.504	0.779
TG 56:7	TG	Positive	M+NH4	922.786	8.92	TG 15:0/18:1-d7/15:0	0.173528	1.27	0.386	0.437	0.346	0.597	1.02	0.288	0.246	0.524	0.687	1.14	0.398	0.396	0.637	0.654	0.882	0.377	0.504	0.67	0.736	1.08	0.442	0.393	0.426	0.484	1.05	0.206	0.454	0.577	0.495	0.978	0.456	0.508	0.437	0.558
TG 56:8	TG	Positive	M+NH4	920.77	8.57	TG 14:0/16:1/14:0-d5	0.196044	0.37	0.134	0.107	0.0859	0.165	0.223	0.1	0.0662	0.128	0.132	0.226	0.111	0.111	0.198	0.165	0.243	0.131	0.135	0.19	0.226	0.306	0.137	0.0997	0.0982	0.119	0.28	0.0576	0.107	0.174	0.127	0.289	0.125	0.123	0.102	0.167
TG 57:2	TG	Positive	M+NH4	946.88	10.4	TG 20:0/20:1/20:0-d5	0.105598	0.0192	0.00691	0.00823	0.00859	0.0159	0.0162	0.00918	0.00878	0.00773	0.0145	0.0187	0.00545	0.0077	0.00688	0.0153	0.016	0.00568	0.00639	0.00506	0.0124	0.0151	0.00793	0.00734	0.00702	0.014	0.0163	0.00705	0.00783	0.00716	0.0104	0.0136	0.00607	0.00653	0.0284	0.0167
TG 57:3	TG	Positive	M+NH4	944.864	10.13	TG 15:0/18:1-d7/15:0	0.0951392	0.0343	0.0127	0.0202	0.0165	0.0279	0.0376	0.0142	0.0196	0.0173	0.0331	0.0375	0.0135	0.0173	0.0158	0.0289	0.0253	0.00983	0.0156	0.012	0.0231	0.0326	0.0188	0.0208	0.0152	0.0295	0.0282	0.0157	0.0175	0.0173	0.0251	0.0263	0.0151	0.0131	0.0132	0.0197
TG 57:4	TG	Positive	M+NH4	942.848	9.85	TG 15:0/18:1-d7/15:0	0.170409	0.0252	0.00794	0.0125	0.0102	0.0187	0.0231	0.00791	0.00869	0.0109	0.0234	0.0221	0.00778	0.0111	0.0116	0.0234	0.0193	0.00679	0.0114	0.00945	0.0188	0.0209	0.00872	0.0112	0.00939	0.0183	0.0203	0.0065	0.0117	0.0105	0.0163	0.0177	0.007	0.00915	0.00704	0.0141
TG 58:2	TG	Positive	M+NH4	960.895	10.55	TG 20:0/20:1/20:0-d5	0.114424	0.054	0.0246	0.0267	0.0264	0.0409	0.0512	0.0276	0.0264	0.0271	0.0432	0.0539	0.0214	0.0243	0.0243	0.0509	0.0442	0.019	0.0212	0.0205	0.0369	0.0475	0.0285	0.0303	0.0229	0.0467	0.0444	0.0253	0.031	0.0246	0.0391	0.0364	0.0182	0.0201	0.0749	0.0568
TG 58:3	TG	Positive	M+NH4	958.88	10.28	TG 20:0/20:1/20:0-d5	0.0836659	0.139	0.0625	0.0748	0.0643	0.125	0.119	0.0675	0.0741	0.0649	0.14	0.14	0.0502	0.0672	0.0624	0.125	0.109	0.0472	0.0598	0.0505	0.119	0.124	0.0645	0.0864	0.0595	0.121	0.135	0.0549	0.0879	0.0658	0.0985	0.0935	0.0489	0.0567	0.228	0.144
TG 58:4	TG	Positive	M+NH4	956.864	10	TG 20:0/20:1/20:0-d5	0.0746362	0.132	0.0613	0.0701	0.0605	0.108	0.102	0.0578	0.0596	0.0696	0.114	0.127	0.0536	0.0652	0.0616	0.145	0.116	0.0493	0.0612	0.057	0.112	0.12	0.0584	0.0728	0.0529	0.111	0.131	0.0367	0.0789	0.0648	0.104	0.101	0.0463	0.0577	0.223	0.164
TG 58:5	TG	Positive	M+NH4	954.848	9.74	TG 20:0/20:1/20:0-d5	0.125168	0.195	0.0709	0.09	0.0688	0.134	0.145	0.057	0.0655	0.0783	0.139	0.172	0.0566	0.0866	0.0857	0.16	0.168	0.0642	0.104	0.0838	0.151	0.142	0.0784	0.0947	0.0631	0.12	0.165	0.0362	0.112	0.0898	0.102	0.145	0.0557	0.0806	0.28	0.215
TG 58:6	TG	Positive	M+NH4	952.833	9.47	TG 15:0/18:1-d7/15:0	0.116927	0.647	0.236	0.332	0.232	0.377	0.475	0.19	0.215	0.335	0.457	0.615	0.234	0.287	0.37	0.413	0.441	0.232	0.325	0.321	0.402	0.502	0.26	0.317	0.299	0.327	0.527	0.159	0.313	0.337	0.34	0.475	0.243	0.327	0.239	0.346
TG 58:7	TG	Positive	M+NH4	950.817	9.17	TG 15:0/18:1-d7/15:0	0.158024	0.984	0.327	0.406	0.297	0.433	0.636	0.254	0.25	0.421	0.502	0.753	0.329	0.397	0.473	0.485	0.661	0.316	0.449	0.46	0.527	0.762	0.368	0.374	0.361	0.362	0.768	0.183	0.417	0.472	0.4	0.69	0.322	0.417	0.346	0.435
TG 58:8	TG	Positive	M+NH4	948.801	9	TG 15:0/18:1-d7/15:0	0.195014	0.859	0.262	0.309	0.247	0.336	0.631	0.199	0.189	0.386	0.431	0.727	0.284	0.301	0.494	0.408	0.545	0.261	0.41	0.497	0.475	0.717	0.307	0.325	0.34	0.309	0.691	0.147	0.352	0.461	0.336	0.674	0.303	0.404	0.318	0.4
TG 59:2	TG	Positive	M+NH4	974.911	10.69	TG 20:0/20:1/20:0-d5	0.14172	0.00877	0.00505	0.00487	0.0033	0.0102	0.01	0.00673	0.00591	0.00487	0.00948	0.012	0.00268	0.00454	0.00486	0.0103	0.00842	0.00395	0.00436	0.00353	0.00676	0.0105	0.00461	0.00676	0.00349	0.0103	0.00884	0.00429	0.00675	0.00387	0.00783	0.00589	0.00387	0.00506	0.0195	0.0111
TG 59:3	TG	Positive	M+NH4	972.895	10.42	TG 20:0/20:1/20:0-d5	0.0882398	0.0166	0.0068	0.00849	0.00783	0.0142	0.0161	0.00695	0.0074	0.00676	0.0134	0.0168	0.00574	0.00777	0.00731	0.0138	0.0147	0.0057	0.00675	0.00604	0.0112	0.017	0.00791	0.00754	0.0062	0.0131	0.0156	0.00552	0.0079	0.00714	0.00932	0.0133	0.0053	0.00633	0.0248	0.0172
TG 59:4	TG	Positive	M+NH4	970.88	10.15	TG 15:0/18:1-d7/15:0	0.0684647	0.014	0.0053	0.00703	0.006	0.0119	0.0152	0.0046	0.00557	0.00736	0.0132	0.0158	0.00414	0.00522	0.00557	0.0109	0.00961	0.00353	0.00621	0.00477	0.00869	0.0132	0.00629	0.00681	0.00498	0.0101	0.0122	0.00476	0.00556	0.00605	0.0102	0.0115	0.00688	0.00497	0.00489	0.00984
TG 60:11	TG	Positive	M+NH4	970.786	8.53	TG 15:0/18:1-d7/15:0	0.199106	0.0664	0.022	0.0362	0.0279	0.0282	0.0436	0.0177	0.0187	0.0494	0.0286	0.0645	0.026	0.0359	0.0629	0.0365	0.0531	0.0261	0.0547	0.0723	0.0521	0.0693	0.0275	0.0397	0.0293	0.0225	0.053	0.0111	0.044	0.0566	0.0263	0.0717	0.0327	0.0493	0.0302	0.0416
TG 60:2	TG	Positive	M+NH4	988.927	10.82	TG 20:0/20:1/20:0-d5	0.113858	0.024	0.0126	0.0128	0.0144	0.0233	0.0213	0.0133	0.0146	0.0128	0.0215	0.0238	0.00972	0.0127	0.0113	0.0252	0.02	0.0103	0.0113	0.0094	0.0166	0.0206	0.0121	0.0149	0.0107	0.0257	0.0199	0.00935	0.0126	0.0128	0.0162	0.0197	0.00955	0.0106	0.0418	0.0243
TG 60:3	TG	Positive	M+NH4	986.911	10.55	TG 20:0/20:1/20:0-d5	0.105705	0.0525	0.0264	0.027	0.0246	0.0409	0.0462	0.0253	0.0231	0.0262	0.0451	0.0524	0.0186	0.0245	0.0242	0.0481	0.0414	0.0193	0.0226	0.0208	0.0369	0.045	0.0262	0.028	0.0223	0.0463	0.0427	0.0222	0.0312	0.023	0.0368	0.0372	0.0167	0.0195	0.0707	0.0587
TG 60:4	TG	Positive	M+NH4	984.895	10.29	TG 20:0/20:1/20:0-d5	0.108367	0.053	0.0199	0.0282	0.0224	0.0393	0.0474	0.0165	0.0216	0.0231	0.0501	0.0514	0.0186	0.024	0.0207	0.0379	0.033	0.0143	0.021	0.0184	0.0394	0.0477	0.0221	0.027	0.0228	0.0374	0.0444	0.0176	0.0263	0.0211	0.0356	0.0344	0.0183	0.021	0.0174	0.0268
TG 60:5	TG	Positive	M+NH4	982.88	10.02	TG 15:0/18:1-d7/15:0	0.0927782	0.0474	0.0198	0.0311	0.0176	0.0386	0.0405	0.014	0.0212	0.0277	0.0445	0.0454	0.0173	0.0277	0.0245	0.0452	0.035	0.0165	0.0285	0.0203	0.0395	0.0478	0.0206	0.0312	0.0196	0.0365	0.0371	0.013	0.0298	0.0253	0.0386	0.0346	0.0193	0.0274	0.0171	0.0343
TG 60:6	TG	Positive	M+NH4	980.864	9.75	TG 15:0/18:1-d7/15:0	0.167574	0.1	0.0344	0.0537	0.0358	0.0631	0.0848	0.0221	0.0323	0.0369	0.0768	0.0713	0.0323	0.0487	0.0517	0.0592	0.0717	0.0254	0.0533	0.046	0.064	0.0704	0.0311	0.0556	0.032	0.0434	0.0615	0.0218	0.0503	0.0401	0.0453	0.0749	0.0375	0.0509	0.0323	0.0607
TG 62:2	TG	Positive	M+NH4	1016.96	11.07	TG 15:0/18:1-d7/15:0	0.124902	0.00849	0.00313	0.00569	0.00354	0.00596	0.00578	0.00223	0.00372	0.00215	0.00676	0.00736	0.00273	0.00513	0.00345	0.00722	0.00461	0.00178	0.00292	0.00246	0.00407	0.00653	0.00301	0.00778	0.0037	0.00654	0.00479	0.00129	0.00261	0.00291	0.0079	0.0041	0.00327	0.00313	0.00321	0.00322
TG 63:3	TG	Positive	M+NH4	1014.94	10.85	TG 15:0/18:1-d7/15:0	0.103238	0.013	0.00647	0.00887	0.00647	0.0115	0.0147	0.0067	0.00892	0.0068	0.0142	0.0129	0.00591	0.00663	0.0075	0.0129	0.00962	0.00555	0.00782	0.00518	0.00975	0.0129	0.00703	0.00896	0.00642	0.0148	0.0093	0.00502	0.00843	0.00664	0.0127	0.00899	0.00696	0.00691	0.00484	0.00778
TG 70:3	TG	Positive	M+NH4	1127.07	11.71	TG 15:0/18:1-d7/15:0	0.118458	0.00344	0.00194	0.00184	0.002	0.00381	0.00418	0.00108	0.00216	0.00146	0.00378	0.00467	0.00106	0.00232	0.00101	0.00345	0.00254	0.000979	0.00186	0.00112	0.00186	0.00397	0.00126	0.00306	0.00186	0.00336	0.00376	0.00211	0.00198	0.00197	0.00395	0.00171	0.00117	0.00204	0.00025	0.00186
TG O-50:2	TG	Positive	M+NH4	862.822	10.06	TG 15:0/18:1-d7/15:0	0.100718	0.0117	0.00482	0.00788	0.00634	0.0127	0.0138	0.00529	0.0102	0.00808	0.0136	0.0128	0.00572	0.00809	0.00484	0.013	0.00997	0.00395	0.00619	0.00402	0.00968	0.0121	0.00701	0.009	0.00639	0.0134	0.00998	0.00501	0.00857	0.00664	0.0124	0.00865	0.00534	0.00597	0.00495	0.00745
TG O-50:3	TG	Positive	M+NH4	860.807	9.78	TG 15:0/18:1-d7/15:0	0.152369	0.00782	0.0023	0.00412	0.00247	0.00656	0.00645	0.00221	0.00295	0.00397	0.00668	0.00758	0.00151	0.00269	0.0029	0.0065	0.00491	0.00263	0.00385	0.00309	0.00653	0.00468	0.00363	0.00472	0.00221	0.00558	0.00518	0.00161	0.00368	0.00324	0.00545	0.00496	0.00281	0.00322	0.0026	0.00476
TG O-52:3	TG	Positive	M+NH4	888.838	10.09	TG 15:0/18:1-d7/15:0	0.105939	0.00694	0.00319	0.00434	0.00321	0.00688	0.00856	0.00305	0.00459	0.00351	0.00873	0.00936	0.00245	0.00489	0.00446	0.00722	0.00593	0.00229	0.00419	0.00327	0.00622	0.00652	0.00364	0.00701	0.00348	0.00711	0.00651	0.00228	0.00573	0.00366	0.00786	0.00624	0.00271	0.00353	0.00379	0.00498

## Sheet: Spleen Data
Analyte	Class	Polarity	Adduct	Expected Mass (m/z)	Retention Time [min]	Internal Standard	Average Relative Change (Replicate Injections)	spleen_ct_1	spleen_ct_2	spleen_ct_3	spleen_ct_4	spleen_ct_5	spleen_Ice_035_1	spleen_Ice_035_2	spleen_Ice_035_3	spleen_Ice_035_4	spleen_Ice_035_5	spleen_Ice_090_1	spleen_Ice_090_2	spleen_Ice_090_3	spleen_Ice_090_4	spleen_Ice_090_5	spleen_Ice_120_1	spleen_Ice_120_2	spleen_Ice_120_3	spleen_Ice_120_4	spleen_Ice_120_5	spleen_RT_035_1	spleen_RT_035_2	spleen_RT_035_3	spleen_RT_035_4	spleen_RT_035_5	spleen_RT_090_1	spleen_RT_090_2	spleen_RT_090_3	spleen_RT_090_4	spleen_RT_090_5	spleen_RT_120_1	spleen_RT_120_2	spleen_RT_120_3	spleen_RT_120_4	spleen_RT_120_5
Cer 18:0;O2/16:0	Cer	Positive	M+H	540.535	5.13	Cer d18:1/16:0-d7	0.00552045	0.256	0.403	0.229	0.2325	0.218	0.32	0.385	0.264	0.253	0.272	0.29	0.293	0.317	0.294	0.315	0.371	0.409	0.265	0.308	0.288	0.521	0.546	0.548	0.776	0.477	0.808	0.709	0.61	0.769	0.652	0.742	0.801	0.698	0.926	0.73
Cer 18:0;O2/22:0	Cer	Positive	M+H	624.629	6.87	Cer d18:1/16:0-d7	0.0245378	0.04975	0.0601	0.03385	0.03305	0.04715	0.0672	0.0405	0.0405	0.042	0.0762	0.0602	0.0398	0.036	0.0441	0.017	0.0489	0.0497	0.0289	0.0605	0.0117	0.076	0.0721	0.0814	0.0997	0.0436	0.0841	0.0827	0.0755	0.0792	0.0691	0.0797	0.0959	0.064	0.0916	0.0588
Cer 18:0;O2/24:0	Cer	Positive	M+H	652.66	7.48	Cer d18:1/16:0-d7	0.0337585	0.159	0.1845	0.141	0.1285	0.158	0.172	0.11	0.116	0.124	0.155	0.186	0.123	0.15	0.188	0.148	0.196	0.147	0.164	0.177	0.15	0.179	0.169	0.174	0.159	0.186	0.189	0.174	0.15	0.16	0.139	0.181	0.146	0.187	0.187	0.145
Cer 18:0;O2/24:1	Cer	Positive	M+H	650.645	6.89	Cer d18:1/16:0-d7	0.0231269	1.53	2.47	1.965	2.05	1.23	1.76	2.05	2.32	2.39	1.38	1.91	2.06	2.49	2.48	1.28	1.93	2.57	2.36	2.8	1.45	2.78	3.46	4.23	5.15	2.34	4.17	4.24	4.29	5.04	2.35	4.09	4.93	5.28	5.3	2.98
Cer 18:1;O2/16:0	Cer	Positive	M+H	538.519	4.92	Cer d18:1/16:0-d7	0.0162858	2.89	4.4	4.365	3.86	2.13	3.32	4.26	4.8	4.24	2.45	3.58	3.96	5.14	4.73	2.69	3.92	5.02	5.02	5.39	2.81	6.8	8.02	8.24	11.7	6.51	10.5	10.8	10.9	13.3	8.12	10.9	12.2	12	14.3	9.27
Cer 18:1;O2/18:0	Cer	Positive	M+H	566.551	5.48	Cer d18:1/16:0-d7	0.0516385	0.379	0.5785	0.4675	0.525	0.2895	0.368	0.476	0.48	0.476	0.376	0.489	0.472	0.546	0.556	0.316	0.471	0.546	0.478	0.61	0.394	0.917	0.989	1.02	1.42	0.877	1.33	1.22	1.2	1.38	0.984	1.21	1.42	1.4	1.52	1.28
Cer 18:1;O2/20:0	Cer	Positive	M+H	594.582	6.16	Cer d18:1/16:0-d7	0.0168076	0.332	0.5625	0.529	0.538	0.2675	0.378	0.508	0.61	0.557	0.334	0.41	0.484	0.684	0.601	0.296	0.433	0.567	0.541	0.655	0.296	0.806	1.02	1.14	1.37	0.67	1.14	1.08	1.28	1.31	0.698	1.04	1.16	1.29	1.54	0.983
Cer 18:1;O2/22:0	Cer	Positive	M+H	622.613	6.67	Cer d18:1/16:0-d7	0.027516	0.956	1.425	1.21	1.24	0.7775	1.08	1.35	1.31	1.44	0.869	1.07	1.31	1.66	1.41	0.803	1.23	1.74	1.55	1.69	0.899	2.13	2.6	3.01	3.74	1.6	3.3	3.21	3.05	3.86	1.77	2.83	3.37	3.72	3.68	2.12
Cer 18:1;O2/23:0	Cer	Positive	M+H	636.629	6.98	Cer d18:1/16:0-d7	0.000199782	0.391	0.5545	0.475	0.442	0.3255	0.392	0.535	0.544	0.513	0.317	0.438	0.498	0.552	0.525	0.311	0.507	0.678	0.564	0.623	0.358	0.834	0.924	1.07	1.36	0.535	1.15	1.07	1.18	1.29	0.581	1.09	1.37	1.35	1.35	0.797
Cer 18:1;O2/24:0	Cer	Positive	M+H	650.645	7.27	Cer d18:1/16:0-d7	0.0231269	1.53	2.47	1.965	2.05	1.23	1.76	2.05	2.32	2.39	1.38	1.91	2.06	2.49	2.48	1.28	1.93	2.57	2.36	2.8	1.45	2.78	3.46	4.23	5.15	2.34	4.17	4.24	4.29	5.04	2.35	4.09	4.93	5.28	5.3	2.98
Cer 18:1;O2/24:1	Cer	Positive	M+H	648.629	6.69	Cer d18:1/16:0-d7	0.0191564	6.035	7.75	6.715	6.34	4.445	6.82	7.5	7.82	7.9	5.05	7.01	7.92	9.37	8.28	4.93	8.27	10.2	9.41	10.2	5.63	11.1	11.4	13.7	15.1	7.8	15.9	13.5	13.6	15.6	8.79	13.5	14.2	15.9	16.4	12
Cer 18:1;O2/26:0	Cer	Positive	M+H	678.676	7.82	Cer d18:1/16:0-d7	0.049153	0.00261	0.0135	0.00885	0.00864	0.00896	0.0121	0.0185	0.00261	0.0115	0.012	0.00812	0.0153	0.0228	0.0214	0.00261	0.00261	0.0222	0.00522	0.0149	0.00261	0.0086	0.0255	0.0222	0.0298	0.00803	0.00565	0.0166	0.037	0.0197	0.02	0.0199	0.024	0.00688	0.0491	0.00261
Cer 18:2;O2/16:0	Cer	Positive	M+H	536.504	4.37	Cer d18:1/16:0-d7	0.0467029	0.04445	0.134	0.12315	0.1245	0.0253	0.0691	0.114	0.139	0.15	0.036	0.136	0.0922	0.193	0.189	0.0477	0.119	0.169	0.13	0.235	0.0596	0.18	0.2	0.265	0.327	0.205	0.347	0.274	0.301	0.362	0.299	0.413	0.313	0.454	0.413	0.366
Cer 18:2;O2/22:0	Cer	Positive	M+H	620.598	6.2	Cer d18:1/16:0-d7	0.0694296	0.17	0.2635	0.2795	0.2435	0.13	0.207	0.262	0.328	0.316	0.157	0.26	0.261	0.376	0.35	0.119	0.271	0.327	0.342	0.412	0.166	0.338	0.338	0.485	0.536	0.21	0.435	0.399	0.493	0.497	0.303	0.394	0.405	0.522	0.551	0.263
Cer 18:2;O2/23:0	Cer	Positive	M+H	634.613	6.51	Cer d18:1/16:0-d7	0.0737423	0.02045	0.1615	0.1395	0.118	0.06875	0.114	0.138	0.184	0.168	0.00426	0.117	0.148	0.223	0.197	0.0866	0.133	0.187	0.186	0.194	0.0874	0.194	0.183	0.237	0.249	0.101	0.257	0.234	0.26	0.252	0.141	0.219	0.254	0.274	0.303	0.144
Cer 18:2;O2/24:1	Cer	Positive	M+H	646.613	6.21	Cer d18:1/16:0-d7	0.00193942	1.053	1.455	1.37	1.14	0.9225	1.23	1.35	1.62	1.45	1.11	1.41	1.42	1.66	1.62	1.02	1.52	1.61	1.58	1.87	1.11	1.79	1.77	2.25	2.52	1.5	2.38	2.09	2.51	2.34	1.7	2.07	2.18	2.75	2.66	2.27
DG 34:1	DG	Positive	M+NH4	612.556	5.9	DG 15:0/18:1-d7	0.00119715	11.6	12.25	15.5	24.75	3.605	4.15	3.77	4.24	5.28	1.37	4.12	3.16	3.68	3.83	1.03	2.43	2.21	3.08	3.14	0.883	2.25	2.41	2.01	1.89	0.29	1.31	1.03	1.27	1.83	0.145	0.841	0.767	0.673	1.1	0.145
DG 34:3	DG	Positive	M+NH4	608.525	5.05	DG 15:0/18:1-d7	0.143897	5.675	8.14	10.285	15.35	1.965	3.5	3.05	3.67	2.55	1.03	2.56	1.84	2.58	2.18	0.663	0.934	0.862	1.6	1.16	0.053	0.412	2.11	0.948	0.619	0.053	0.558	0.268	0.227	0.243	0.053	0.459	0.106	0.053	0.053	0.053
DG 36:2	DG	Positive	M+NH4	638.572	6.05	DG 15:0/18:1-d7	0.0398269	46.75	44.1	49.25	83.95	9.425	22.9	15.1	18.3	20.6	4.79	18	10.2	13.5	12.2	3.24	10.9	7.06	9.96	9.64	2.38	7.43	7.6	5.46	5.31	0.846	4.5	3.96	3.9	5.72	0.652	2.72	2.86	2	2.41	0.393
DG 36:3	DG	Positive	M+NH4	636.556	5.6	DG 15:0/18:1-d7	0.0279107	55.7	68.15	73.45	117.5	13.55	25.8	26	30.4	26.8	7.13	22.9	15	19.5	19.3	5.76	13.5	10.6	16.3	13.9	2.97	9.88	13.7	9.33	8.81	1.31	4.86	4.74	6.12	6.36	0.873	3.41	3.99	2.73	3.07	0.82
DG 38:4	DG	Positive	M+NH4	662.572	5.9	DG 15:0/18:1-d7	0.0376965	3.27	2.695	3.885	4.995	5.065	1.53	1.69	1.66	2.09	3.53	2.06	1.41	1.05	1.56	3.22	1.39	0.849	0.979	0.681	3.15	0.991	0.777	0.504	0.101	1.99	0.845	0.389	0.0818	0.0564	1.69	0.0362	0.272	0.0569	0.0364	1.53
DG 38:5	DG	Positive	M+NH4	660.556	5.38	DG 15:0/18:1-d7	0.0966027	10.245	15.75	20.45	21.75	4.915	5.48	8.01	11.9	10.4	3.19	5.4	6.05	7.04	6.18	2.61	4.76	4	5.8	4.45	1.93	4.3	4.46	4.31	2.95	1.06	2.14	2.13	3	2.54	0.832	1.34	2.24	1.81	1.5	0.657
DG 40:6	DG	Positive	M+NH4	686.572	5.4	DG 15:0/18:1-d7	0.0777681	2.565	2.655	4.29	5.005	1.78	1.52	1.63	2.09	2.16	0.67	1.56	1.23	1.78	1.62	0.608	1.07	0.631	1.04	1.05	0.437	1.12	1.55	0.823	1.3	0.37	1.43	0.345	0.808	0.609	0.639	0.802	0.518	0.357	0.311	0.385
DG 40:7	DG	Positive	M+NH4	684.556	5.19	DG 15:0/18:1-d7	0.0389341	7.05	8.77	12.75	15.95	2.845	4.66	4.84	6.42	6.26	1.6	3.91	3.35	4.04	3.45	1.52	2.95	2.05	3.57	3.13	0.953	2.69	2.49	2.62	2.42	0.65	1.49	1.21	2.02	1.79	0.376	0.89	1.35	1.08	1.21	0.188
Hex2Cer 18:1;O2/16:0	HexCer	Positive	M+H	862.625	4.24	LacCer d18:1/17:0	0.129306	0.02875	0.0434	0.08735	0.0163	0.0356	0.00545	0.048	0.00545	0.112	0.0746	0.0131	0.0109	0.0726	0.0232	0.0968	0.0365	0.0488	0.0135	0.0281	0.0192	0.0862	0.0734	0.0483	0.0714	0.0872	0.149	0.116	0.0792	0.122	0.141	0.166	0.206	0.148	0.163	0.0575
Hex2Cer 18:1;O2/24:0	HexCer	Positive	M+H	974.75	6.37	LacCer d18:1/17:0	0.0774888	0.10125	0.0706	0.10935	0.0873	0.0769	0.0923	0.0516	0.083	0.137	0.0521	0.0631	0.0574	0.131	0.0994	0.0779	0.159	0.0777	0.0844	0.106	0.0753	0.108	0.0976	0.115	0.109	0.109	0.117	0.0826	0.188	0.103	0.173	0.116	0.108	0.103	0.125	0.073
Hex2Cer 18:1;O2/24:1	HexCer	Positive	M+H	972.735	5.76	LacCer d18:1/17:0	0.140541	0.391	0.33	0.339	0.374	0.2775	0.328	0.375	0.237	0.44	0.368	0.326	0.196	0.353	0.387	0.223	0.447	0.339	0.296	0.404	0.254	0.393	0.342	0.265	0.219	0.38	0.461	0.296	0.357	0.247	0.382	0.448	0.497	0.414	0.413	0.316
HexCer 18:1;O2/18:0	HexCer	Positive	M+H	728.603	4.94	LacCer d18:1/17:0	0.0298756	0.9135	0.904	0.703	0.7115	0.93	0.937	0.863	0.586	0.816	0.898	0.77	0.791	0.854	0.813	1.03	0.935	0.741	0.718	0.954	0.898	0.652	0.594	0.38	0.343	0.901	0.484	0.335	0.325	0.208	0.834	0.512	0.284	0.23	0.257	0.575
HexCer 18:1;O2/20:0	HexCer	Positive	M+H	756.635	5.52	LacCer d18:1/17:0	0.0111973	1.063	1.105	0.831	0.948	1.075	1.16	0.993	0.646	1.04	1.08	0.963	0.82	1.15	0.943	0.968	1.2	0.786	0.803	1.13	0.953	0.755	0.587	0.455	0.382	1.07	0.511	0.356	0.385	0.211	0.824	0.561	0.425	0.285	0.362	0.788
HexCer 18:1;O2/22:0	HexCer	Positive	M+H	784.666	6.07	LacCer d18:1/17:0	0.00811335	3.025	3.04	2.34	2.675	3.2	3.4	3.19	1.82	2.98	3.48	2.9	2.45	3.49	2.68	2.94	3.36	2.51	2.15	3.36	2.84	2.31	1.77	1.33	1.09	3.02	1.77	1.11	1.18	0.696	2.56	1.73	1.18	0.757	1.17	2.44
HexCer 18:1;O2/23:1	HexCer	Positive	M+H	796.666	5.79	LacCer d18:1/17:0	0.0798983	0.1605	0.0975	0.0402	0.0598	0.0861	0.144	0.0472	0.0503	0.0837	0.0819	0.112	0.0508	0.0924	0.0551	0.0793	0.146	0.00999	0.0251	0.103	0.0788	0.0311	0.0296	0.0491	0.004435	0.0789	0.0453	0.004435	0.004435	0.004435	0.0692	0.0457	0.004435	0.0091	0.00887	0.004435
HexCer 18:1;O2/24:0	HexCer	Positive	M+H	812.697	6.71	LacCer d18:1/17:0	0.017923	4.025	3.42	2.62	2.935	3.835	4.52	3.47	2.32	4.19	3.94	3.51	3.46	4.05	3.24	3.26	4.35	3.51	3	4.2	3.74	3.46	2.34	1.88	1.56	3.39	2.68	1.47	1.52	1.23	3.3	2.14	1.81	1.27	1.51	2.7
HexCer 18:1;O2/24:1	HexCer	Positive	M+H	810.682	6.06	LacCer d18:1/17:0	0.0155889	9.775	7.995	6.795	7.635	9.455	11.1	8.25	5.16	8.61	10.4	8.75	6.54	8.79	7.32	8.48	10.2	6.38	5.37	8.26	8.22	7.41	4.44	3.78	3.09	8.87	5.21	2.75	3.31	2.01	7.3	5.15	2.79	2.31	2.83	6.51
HexCer 18:1;O2/24:2	HexCer	Positive	M+H	808.666	5.6	LacCer d18:1/17:0	0.0378261	0.9695	0.818	0.7405	0.7375	1.155	1.07	0.846	0.609	0.874	1.2	0.779	0.679	0.938	0.661	0.965	1.07	0.603	0.614	0.87	0.962	0.849	0.386	0.406	0.263	1.06	0.491	0.24	0.338	0.167	0.806	0.486	0.271	0.225	0.247	0.663
LPC 16:0	LPC	Positive	M+H	496.34	2.61	LPC 18:1-d7	0.0236819	2.285	2.605	2.285	2.095	2.575	2.96	2.41	2.63	2.38	2.97	2.67	2.25	2.71	2.67	2.47	2.87	2.49	2.64	2.72	2.8	3.56	3.07	2.75	2.86	3.49	3.74	3.35	3.85	3.74	4.12	4.05	3.56	4.21	3.75	3.92
LPC 17:0	LPC	Positive	M+H	510.355	2.68	LPC 18:1-d7	0.0350614	0.0459	0.04755	0.03915	0.0424	0.044	0.0531	0.0481	0.0413	0.0453	0.0439	0.0525	0.0395	0.0383	0.045	0.0475	0.0529	0.0419	0.0341	0.0421	0.0387	0.06	0.0448	0.0377	0.0418	0.0426	0.0521	0.0448	0.0412	0.0488	0.0519	0.0535	0.0422	0.0443	0.0451	0.0427
LPC 18:0	LPC	Positive	M+H	524.371	2.78	LPC 18:1-d7	0.0164498	1.73	2.18	2.12	1.89	1.805	1.93	1.99	2.3	2.06	1.97	1.81	1.7	2.25	2.07	1.68	1.93	1.76	2.13	2.16	1.84	1.86	2.26	2.02	1.88	1.84	1.67	2.07	2.06	2.13	2.16	1.9	1.84	1.99	1.82	1.94
LPC 18:1	LPC	Positive	M+H	522.355	2.65	LPC 18:1-d7	0.0316388	0.527	0.5245	0.5805	0.442	0.597	0.616	0.552	0.62	0.474	0.594	0.609	0.554	0.712	0.554	0.623	0.71	0.588	0.758	0.609	0.625	0.852	0.754	0.826	0.801	0.984	1.1	0.975	1.22	0.995	1.31	1.23	1.07	1.29	1.18	1.2
LPC 18:2	LPC	Positive	M+H	520.34	2.53	LPC 18:1-d7	0.0849933	0.345	0.435	0.488	0.3235	0.4445	0.466	0.41	0.586	0.464	0.458	0.329	0.473	0.69	0.582	0.415	0.542	0.537	0.698	0.563	0.431	0.756	0.752	0.858	0.709	0.84	0.934	0.966	1.2	1.02	1.32	0.895	1.03	1.62	1.18	1.01
LPC 18:3	LPC	Positive	M+H	518.324	2.45	LPC 18:1-d7	0.0675565	0.1785	0.202	0.183	0.1685	0.2035	0.235	0.192	0.211	0.189	0.241	0.227	0.178	0.231	0.216	0.196	0.231	0.209	0.22	0.219	0.226	0.282	0.246	0.234	0.237	0.298	0.301	0.275	0.336	0.313	0.349	0.348	0.302	0.363	0.311	0.307
LPC 19:0	LPC	Positive	M+H	538.387	2.88	LPC 18:1-d7	0.0747863	0.02195	0.0304	0.02085	0.0191	0.02375	0.0221	0.0238	0.0252	0.0233	0.0355	0.0238	0.0217	0.0238	0.023	0.0269	0.0224	0.0234	0.0248	0.023	0.0253	0.0247	0.0289	0.0206	0.0192	0.023	0.0227	0.0288	0.0245	0.0253	0.029	0.0252	0.0246	0.0211	0.0211	0.0314
LPC 20:0	LPC	Positive	M+H	552.402	3	LPC 18:1-d7	0.000757488	0.00949	0.01245	0.01045	0.008155	0.01205	0.0101	0.0107	0.0123	0.0108	0.0137	0.0106	0.0098	0.01	0.0113	0.012	0.0113	0.0107	0.0118	0.00938	0.0125	0.0102	0.0137	0.00988	0.00985	0.0112	0.0095	0.0135	0.0107	0.0115	0.0133	0.00962	0.0104	0.0103	0.01	0.0135
LPC 20:1	LPC	Positive	M+H	550.387	2.81	LPC 18:1-d7	0.0638342	0.01845	0.0214	0.02305	0.0172	0.02255	0.0201	0.0206	0.0281	0.0179	0.0253	0.0217	0.0172	0.0257	0.0213	0.0237	0.0264	0.0203	0.0259	0.0227	0.0253	0.0248	0.0283	0.0281	0.0237	0.0314	0.0292	0.0317	0.0336	0.0339	0.0448	0.0329	0.0299	0.0373	0.031	0.0406
LPC 20:2	LPC	Positive	M+H	548.371	2.68	LPC 18:1-d7	0.030698	0.005575	0.008605	0.0132	0.00759	0.01175	0.00554	0.0103	0.0164	0.00499	0.0109	0.00618	0.00905	0.013	0.00728	0.0135	0.0128	0.00672	0.0175	0.00959	0.0123	0.0164	0.017	0.0178	0.0178	0.0306	0.0289	0.0304	0.0394	0.0207	0.0454	0.0293	0.0341	0.0361	0.027	0.0431
LPC 20:3	LPC	Positive	M+H	546.355	2.78	LPC 18:1-d7	0.0709459	0.0272	0.0396	0.0529	0.02825	0.04275	0.0405	0.0373	0.0631	0.0368	0.0486	0.0322	0.0354	0.0681	0.0486	0.0409	0.0425	0.0447	0.0717	0.0518	0.0494	0.0652	0.0626	0.0763	0.0604	0.0915	0.0779	0.0775	0.118	0.0971	0.121	0.0748	0.0838	0.151	0.102	0.103
LPC 20:4	LPC	Positive	M+H	544.34	2.52	LPC 18:1-d7	0.137747	0.3925	0.4575	0.5915	0.361	0.3595	0.592	0.502	0.68	0.539	0.42	0.381	0.646	0.865	0.734	0.422	0.741	0.666	0.851	0.736	0.469	1.02	0.947	1.13	0.935	1.1	1.4	1.38	1.57	1.31	1.86	1.26	1.39	2.05	1.58	1.4
LPC 20:5	LPC	Positive	M+H	542.324	2.4	LPC 18:1-d7	0.123729	0.02445	0.0333	0.0414	0.0258	0.0334	0.0318	0.0299	0.0501	0.0385	0.0351	0.0261	0.0372	0.0653	0.0522	0.0303	0.0454	0.0455	0.0636	0.0506	0.035	0.0599	0.0628	0.0774	0.0643	0.0679	0.0777	0.0828	0.119	0.089	0.107	0.0809	0.0902	0.157	0.106	0.0847
LPC 22:0	LPC	Positive	M+H	580.434	3.3	LPC 18:1-d7	0.0161433	0.006405	0.00844	0.004105	0.005185	0.006495	0.00689	0.00662	0.00467	0.00587	0.00763	0.00696	0.00509	0.00559	0.00633	0.00693	0.00631	0.0071	0.00515	0.0062	0.00699	0.00643	0.009	0.0064	0.0057	0.006	0.00527	0.00691	0.00535	0.00652	0.007	0.00713	0.00591	0.00459	0.00565	0.00542
LPC 22:4	LPC	Positive	M+H	572.371	2.64	LPC 18:1-d7	0.115034	0.01935	0.0244	0.02445	0.01435	0.0145	0.0318	0.0284	0.0276	0.0211	0.0216	0.0232	0.0284	0.0346	0.0275	0.0236	0.0385	0.0306	0.038	0.0265	0.0278	0.0537	0.0477	0.0397	0.038	0.0699	0.0752	0.0577	0.0674	0.0582	0.0978	0.0687	0.0634	0.0741	0.0676	0.0918
LPC 22:5	LPC	Positive	M+H	570.355	2.53	LPC 18:1-d7	0.00351179	0.01245	0.0154	0.02025	0.009925	0.01315	0.0168	0.017	0.0236	0.0151	0.0174	0.0113	0.0172	0.0246	0.0182	0.0154	0.0229	0.0204	0.0282	0.0197	0.0166	0.0336	0.0278	0.0296	0.0278	0.0363	0.0419	0.037	0.0433	0.0327	0.0557	0.0365	0.0368	0.0605	0.0417	0.0507
LPC 22:6	LPC	Positive	M+H	568.34	2.49	LPC 18:1-d7	0.14757	0.0556	0.0585	0.0596	0.0477	0.0557	0.0767	0.0554	0.067	0.067	0.0558	0.0486	0.069	0.0779	0.0777	0.0549	0.0872	0.0752	0.0712	0.0828	0.0573	0.121	0.0932	0.101	0.0944	0.127	0.158	0.133	0.13	0.129	0.189	0.126	0.116	0.153	0.147	0.157
LPC 24:0	LPC	Positive	M+H	608.465	3.65	LPC 18:1-d7	0.0596361	0.01095	0.01395	0.008975	0.009645	0.01215	0.0124	0.0108	0.00943	0.0105	0.0147	0.0135	0.0112	0.00924	0.0119	0.0125	0.0125	0.012	0.00991	0.0122	0.0129	0.0122	0.0152	0.00951	0.0112	0.0122	0.0105	0.012	0.00999	0.0135	0.0136	0.0124	0.0124	0.00889	0.0121	0.0113
LPC 24:1	LPC	Positive	M+H	606.449	3.3	LPC 18:1-d7	0.0426935	0.003825	0.004625	0.00324	0.00343	0.00456	0.00522	0.00416	0.00318	0.00368	0.0054	0.00468	0.00351	0.00482	0.00443	0.00506	0.00589	0.00489	0.00354	0.00427	0.00507	0.00527	0.00643	0.00425	0.00401	0.00445	0.00448	0.0058	0.0048	0.00532	0.00593	0.00601	0.00531	0.00452	0.00435	0.00477
LPC O-16:0	LPC-O	Negative	M+HCO2	526.351	2.69	LPC O-16:0-d4	0.000371719	0.6465	0.813	0.6515	0.666	0.6985	0.728	0.727	0.668	0.656	0.688	0.66	0.759	0.677	0.688	0.724	0.769	0.724	0.737	0.745	0.707	0.679	0.799	0.687	0.753	0.6	0.733	0.769	0.638	0.599	0.71	0.682	0.715	0.592	0.742	0.545
LPC O-18:0	LPC-O	Negative	M+HCO2	554.383	2.89	LPC O-16:0-d4	0.0269311	0.222	0.297	0.2035	0.205	0.264	0.279	0.217	0.214	0.217	0.289	0.267	0.253	0.238	0.198	0.283	0.275	0.266	0.218	0.221	0.285	0.244	0.254	0.198	0.185	0.255	0.263	0.263	0.189	0.234	0.259	0.227	0.292	0.199	0.233	0.236
LPC O-18:1	LPC-O	Negative	M+HCO2	552.367	2.76	LPC O-16:0-d4	0.00526279	1.045	1.245	1.17	1.065	1.075	1.28	1.32	1.15	1.08	1.09	1.23	1.11	1.27	1.08	1.13	1.29	1.14	1.38	1.26	1.12	1.38	1.39	1.32	1.45	1.25	1.63	1.53	1.41	1.24	1.55	1.54	1.55	1.42	1.45	1.39
LPC O-24:1	LPC-O	Positive	M+H	592.47	3.48	LPC O-16:0-d4	0.0502856	0.0476	0.05555	0.0396	0.03955	0.0435	0.0447	0.0424	0.0378	0.0416	0.0644	0.0532	0.0463	0.0401	0.048	0.0538	0.0643	0.0392	0.0387	0.0636	0.0563	0.0477	0.0414	0.0351	0.0344	0.0668	0.0437	0.0494	0.0483	0.0462	0.0575	0.0421	0.0453	0.0256	0.0499	0.0463
LPE 16:0	LPE	Negative	M-H	452.278	2.64	LPE 18:1-d7	0.0880139	3.23	2.595	4.03	2.935	3.75	3.78	3.38	3.95	3.32	3.14	4.51	4.03	6.35	3.95	4.07	4.38	3.97	6.67	4.32	3.85	4.18	4.15	5.2	5.34	3.8	5.12	5.68	8.16	5.85	5.86	6.49	6.29	9.02	6.39	4.93
LPE 17:0	LPE	Negative	M-H	466.294	2.73	LPE 18:1-d7	0.13073	0.0907	0.0764	0.0971	0.0883	0.1014	0.122	0.0879	0.107	0.077	0.0754	0.0909	0.0915	0.139	0.0808	0.0952	0.132	0.0847	0.164	0.101	0.0942	0.117	0.121	0.144	0.139	0.0961	0.141	0.153	0.196	0.119	0.123	0.175	0.137	0.207	0.164	0.103
LPE 18:0	LPE	Negative	M-H	480.31	2.82	LPE 18:1-d7	0.146798	4.67	4.47	6.455	4.81	5.665	5.39	6.02	6.75	4.93	4.58	4.51	5.91	8.45	5.98	5.73	7.18	5.88	9.66	6.18	5.26	6.41	7.53	9.16	8.71	5.86	8.54	10.1	13.2	8.92	8.04	9.61	10.2	14.6	11.5	6.94
LPE 18:1	LPE	Negative	M-H	478.294	2.69	LPE 18:1-d7	0.141839	2.675	2.33	4.08	2.73	2.96	3.23	3.15	4.1	3.18	2.48	3.78	3.78	6.31	4	3.2	3.79	3.85	6.92	4.48	3.01	3.79	4.19	5.99	5.53	3.43	5.14	6.16	9.61	6.52	5.19	6.65	6.4	10.1	7.12	4.65
LPE 18:2	LPE	Negative	M-H	476.278	2.57	LPE 18:1-d7	0.128414	0.9445	0.8685	1.48	0.96	1.145	1.28	1.14	1.56	1.24	0.953	1.25	1.39	2.25	1.48	1.28	1.31	1.46	2.37	1.65	1.21	1.55	1.57	2.47	2.41	1.65	2.09	2.43	3.55	2.74	2.37	2.34	2.52	3.95	3.09	2.24
LPE 20:0	LPE	Negative	M-H	508.341	3.06	LPE 18:1-d7	0.0164668	0.216	0.288	0.259	0.2125	0.241	0.243	0.241	0.25	0.213	0.271	0.266	0.24	0.287	0.221	0.261	0.226	0.264	0.274	0.235	0.241	0.214	0.248	0.266	0.243	0.226	0.245	0.248	0.28	0.253	0.272	0.241	0.285	0.277	0.243	0.25
LPE 20:1	LPE	Negative	M-H	506.325	2.86	LPE 18:1-d7	0.0512405	0.06815	0.0566	0.0614	0.06	0.07385	0.0685	0.0672	0.0777	0.0539	0.0713	0.0826	0.0711	0.0922	0.0702	0.0888	0.0839	0.0598	0.11	0.0758	0.084	0.122	0.0945	0.117	0.104	0.136	0.138	0.136	0.162	0.133	0.186	0.142	0.141	0.187	0.151	0.184
LPE 20:2	LPE	Negative	M-H	504.31	2.74	LPE 18:1-d7	0.0246261	0.04175	0.0399	0.06285	0.0405	0.05035	0.0461	0.0443	0.0792	0.0523	0.0538	0.0414	0.0689	0.0846	0.0604	0.0496	0.0525	0.0519	0.109	0.077	0.0549	0.0883	0.102	0.114	0.11	0.0918	0.109	0.126	0.154	0.125	0.151	0.117	0.129	0.17	0.161	0.125
LPE 20:3	LPE	Negative	M-H	502.294	2.62	LPE 18:1-d7	0.0715455	0.277	0.2485	0.4055	0.249	0.3315	0.341	0.332	0.384	0.346	0.291	0.362	0.383	0.629	0.401	0.37	0.353	0.39	0.65	0.423	0.347	0.416	0.46	0.646	0.613	0.469	0.572	0.643	1.01	0.671	0.693	0.602	0.721	1.1	0.757	0.658
LPE 20:4	LPE	Negative	M-H	500.278	2.54	LPE 18:1-d7	0.113672	13.9	12.95	15.2	11.85	14.3	17.8	13.9	15.1	17.2	13	19.2	18.2	24.5	19.7	16.1	16.1	20.2	22.8	20.5	15.9	18	16.8	20.3	23.5	17.3	20.9	24.4	28.6	25.9	24.2	24.8	23.8	28.1	24.7	28.9
LPE 22:3	LPE	Negative	M-H	530.325	2.7	LPE 18:1-d7	0.0619639	0.08335	0.08035	0.09805	0.0685	0.1075	0.0927	0.0767	0.0932	0.104	0.0956	0.165	0.108	0.174	0.127	0.124	0.0945	0.13	0.156	0.11	0.115	0.099	0.0814	0.122	0.117	0.109	0.125	0.136	0.201	0.119	0.179	0.157	0.142	0.153	0.105	0.176
LPE 22:4	LPE	Negative	M-H	528.31	2.68	LPE 18:1-d7	0.0390225	3.32	2.98	3.005	2.37	3.66	3.7	3.25	2.84	3.22	3.45	5.06	4.01	5.03	3.96	4.02	3.83	4.25	4.76	4.01	4.14	3.86	3.66	3.55	4.06	3.88	4.44	5.37	5.62	4.85	6.16	5.48	5.22	5.41	4.05	6.43
LPE 22:5	LPE	Negative	M-H	526.294	2.55	LPE 18:1-d7	0.0765624	1.49	1.52	1.745	1.185	1.63	1.78	1.55	1.63	1.73	1.52	1.95	1.92	2.74	2	1.83	1.75	2.12	2.52	2.03	1.79	1.86	1.92	2.28	2.34	1.88	2.14	2.73	3.22	2.61	2.77	2.41	2.74	3.31	2.43	3.01
LPE O-16:1	LPE-O	Negative	M-H	436.283	2.73	LPE 18:1-d7	0.194764	2.16	1.83	2.965	2.44	2.705	2.61	2.66	2.79	1.86	1.98	1.43	2.22	2.89	2.3	2.47	3.06	1.83	3.56	2.17	2.08	2.85	2.99	3.01	3.62	2.73	3.61	3.5	3.75	2.56	3.1	3.34	2.63	3.68	3.61	2.52
LPE O-18:1	LPE-O	Negative	M-H	464.315	2.95	LPE 18:1-d7	0.135848	1.135	0.881	1.135	0.943	1.285	1.38	1.04	1.01	0.855	1.2	0.854	0.947	1.1	0.969	1.17	1.27	0.833	1.23	0.951	1.03	1.23	1.35	1.3	1.63	1.21	1.72	1.54	1.5	1.18	1.44	1.56	1.28	1.6	1.66	1.22
LPE O-18:2	LPE-O	Negative	M-H	462.299	2.76	LPE 18:1-d7	0.213725	0.8605	0.7085	1.18	0.89	0.89	0.955	0.999	1.2	0.758	0.726	0.652	0.858	1.28	0.943	0.903	1.23	0.745	1.49	0.922	0.802	1.15	1.14	1.37	1.38	1.11	1.6	1.36	1.79	1.16	1.28	1.4	1.17	1.83	1.69	1.08
LPE O-20:1	LPE-O	Negative	M-H	492.346	3.21	LPE 18:1-d7	0.0479727	0.09745	0.08445	0.10165	0.08205	0.1095	0.118	0.0812	0.0847	0.087	0.101	0.0848	0.073	0.0945	0.0812	0.102	0.105	0.0745	0.0892	0.0756	0.0943	0.11	0.0957	0.104	0.119	0.104	0.125	0.107	0.105	0.0911	0.129	0.127	0.0817	0.104	0.127	0.091
LPG 16:0	LPG	Negative	M-H	483.273	2.53	LPG 17:1	0.0362611	0.0401	0.06635	0.0982	0.056	0.04505	0.0516	0.0708	0.114	0.0596	0.0308	0.0619	0.0852	0.149	0.099	0.043	0.0577	0.0889	0.161	0.113	0.0368	0.139	0.204	0.367	0.317	0.115	0.234	0.388	0.59	0.496	0.165	0.272	0.44	0.622	0.506	0.118
LPG 18:1	LPG	Negative	M-H	509.288	2.57	LPG 17:1	0.0246157	0.3295	0.35	0.384	0.465	0.424	0.266	0.238	0.29	0.249	0.236	0.208	0.191	0.231	0.203	0.21	0.219	0.149	0.232	0.174	0.188	0.371	0.348	0.434	0.431	0.401	0.434	0.403	0.436	0.391	0.415	0.428	0.384	0.467	0.421	0.368
LPG 18:2	LPG	Negative	M-H	507.273	2.47	LPG 17:1	0.133299	0.135	0.1615	0.149	0.2095	0.1885	0.107	0.103	0.109	0.0882	0.103	0.0744	0.0725	0.0875	0.0918	0.079	0.0843	0.0682	0.0969	0.0732	0.0816	0.156	0.172	0.178	0.174	0.176	0.15	0.155	0.246	0.187	0.191	0.186	0.172	0.268	0.206	0.174
LPI 16:0	LPI	Negative	M-H	571.289	2.5	LPI 17:1	0.138384	0.183	0.247	0.4055	0.2545	0.2355	0.221	0.337	0.367	0.26	0.19	0.209	0.38	0.44	0.323	0.244	0.293	0.316	0.412	0.347	0.218	0.266	0.35	0.358	0.428	0.252	0.399	0.451	0.379	0.303	0.371	0.401	0.331	0.4	0.375	0.231
LPI 18:0	LPI	Negative	M-H	599.32	2.65	LPI 17:1	0.038724	1.55	1.445	2.675	1.94	1.575	1.23	1.85	2.1	1.68	1.2	1.28	1.94	2.62	1.98	1.72	1.78	1.37	2.54	1.88	1.45	1.31	1.65	1.66	2.11	1.04	1.43	1.8	1.71	1.57	1.41	1.7	1.05	1.85	1.71	0.564
LPI 18:1	LPI	Negative	M-H	597.305	2.53	LPI 17:1	0.00563764	0.274	0.4265	0.629	0.3395	0.195	0.229	0.71	0.819	0.819	0.128	0.243	0.937	1.07	1.03	0.18	0.334	0.938	1.16	1.3	0.184	0.549	1.01	1.12	1.15	0.194	0.648	1.08	1.19	1.09	0.208	0.628	0.796	1.09	1.01	0.0995
LPS 18:0	LPS	Negative	M-H	524.299	2.62	LPI 17:1	0.101182	4.565	9.875	17.55	4.995	2.665	5.33	13.8	24.9	11.9	3.71	7.95	18.2	30	14.8	6.02	12	19.7	38.2	21.8	6.39	12.4	24.2	44.8	35.7	7.93	22.6	45.8	66.8	52.1	13.3	27.1	50.4	74.5	55	11.5
LPS 18:1	LPS	Negative	M-H	522.284	2.45	LPI 17:1	0.0322885	0.7265	0.983	1.805	0.583	0.516	0.84	1.43	2.31	1.1	0.578	0.927	1.79	2.86	1.37	0.952	1.66	1.8	3.28	1.74	0.939	1.72	2.26	4.05	2.84	1.93	3.12	4.2	4.86	3.88	3.09	3.3	4.64	5.94	4.25	2.44
LPS 20:4	LPS	Negative	M-H	544.268	2.37	LPI 17:1	0.117179	1.16	1.42	1.885	1.04	1.0425	1.32	1.73	1.88	1.18	1.12	1.18	2.04	2.11	1.59	1.46	2.04	1.97	2.47	1.78	1.54	2.38	2.49	2.4	2.47	2.87	3.28	3.87	3.8	3.04	3.98	3.15	3.88	3.54	3.77	3.63
PC 22:1	PC	Positive	M+H	592.397	2.73	PC 15:0/18:1-d7	0.142187	5.58e-05	6.365e-05	4.445e-05	5.98e-05	9.81e-05	0.000596	0.000137	0.000273	0.000424	6.94e-05	0.00302	0.00113	0.00267	0.000309	0.000152	0.000345	0.0021	0.00197	0.00174	0.000194	4.36e-05	0.000456	9.02e-05	7.49e-05	6.91e-05	6.44e-05	0.000688	0.00189	0.001	0.00139	0.0028	0.00214	0.000958	0.000133	7.11e-05
PC 25:0	PC	Positive	M+H	636.46	3.2	PC 15:0/18:1-d7	0.0490897	0.00369	0.0022	0.003055	0.002985	0.00429	0.00591	0.00401	0.00324	0.00485	0.00383	0.00814	0.0142	0.0235	0.00622	0.00904	0.00604	0.00776	0.00702	0.0112	0.00672	0.00349	0.00758	0.00256	0.00419	0.00427	0.00445	0.00791	0.00763	0.0051	0.0161	0.0109	0.00892	0.00586	0.00279	0.00862
PC 28:0	PC	Positive	M+H	678.507	3.8	PC 15:0/18:1-d7	0.00803739	0.00324	0.00297	0.00349	0.00264	0.00396	0.00329	0.00296	0.00313	0.0025	0.00447	0.00298	0.00265	0.00353	0.00265	0.00429	0.00349	0.00252	0.0036	0.0028	0.00367	0.00309	0.00271	0.00337	0.00255	0.00467	0.00262	0.00269	0.00348	0.00242	0.00402	0.00316	0.00309	0.00292	0.00244	0.0038
PC 30:0	PC	Positive	M+H	706.538	4.17	PC 15:0/18:1-d7	0.0272493	0.2365	0.251	0.273	0.216	0.2875	0.276	0.254	0.244	0.224	0.324	0.256	0.221	0.291	0.228	0.288	0.26	0.247	0.27	0.252	0.302	0.237	0.235	0.242	0.234	0.271	0.218	0.215	0.263	0.201	0.275	0.241	0.213	0.237	0.224	0.28
PC 30:1	PC	Positive	M+H	704.522	3.87	PC 15:0/18:1-d7	0.0306378	0.02445	0.02505	0.02685	0.0215	0.0285	0.0285	0.0256	0.0261	0.0218	0.0315	0.0248	0.0233	0.028	0.0219	0.0293	0.0285	0.0227	0.0253	0.0256	0.0279	0.0263	0.0233	0.027	0.0222	0.032	0.0257	0.0213	0.0274	0.0214	0.0277	0.0246	0.024	0.0226	0.024	0.0259
PC 31:0	PC	Positive	M+H	720.554	4.39	PC 15:0/18:1-d7	0.045401	0.1047	0.08665	0.08655	0.0738	0.08995	0.114	0.0818	0.0767	0.0838	0.101	0.108	0.0825	0.101	0.0776	0.0968	0.109	0.0836	0.102	0.0958	0.0911	0.0989	0.0874	0.0771	0.0896	0.0911	0.0887	0.0809	0.0888	0.0939	0.087	0.101	0.0858	0.0737	0.0922	0.0939
PC 31:1	PC	Positive	M+H	718.538	4.05	PC 15:0/18:1-d7	0.0362359	0.008305	0.00767	0.008475	0.006505	0.0083	0.00914	0.00719	0.0081	0.00636	0.00968	0.00917	0.00653	0.00998	0.00721	0.00898	0.0108	0.00748	0.00878	0.00777	0.00917	0.00768	0.00682	0.00695	0.00684	0.00816	0.00829	0.006	0.00785	0.00646	0.00878	0.00936	0.00706	0.00644	0.00678	0.0086
PC 31:2	PC	Positive	M+H	716.522	3.72	PC 15:0/18:1-d7	0.0114687	0.0288	0.0368	0.04315	0.037	0.02935	0.0295	0.0332	0.0408	0.0412	0.0309	0.0272	0.0314	0.0398	0.0386	0.0278	0.0319	0.0327	0.042	0.0374	0.0292	0.0321	0.0319	0.0443	0.0364	0.0292	0.0291	0.0319	0.0402	0.0345	0.0284	0.03	0.03	0.0387	0.0377	0.028
PC 32:0	PC	Positive	M+H	734.569	4.59	PC 15:0/18:1-d7	0.0372955	4.22	3.65	3.69	3.495	3.76	4.1	3.72	3.33	3.85	4.24	3.8	3.72	4.27	3.79	3.59	4.41	3.67	3.93	4.18	3.78	4.02	3.71	3.96	3.53	4.12	3.97	3.49	3.79	4.02	4.26	4.69	4.19	3	3.45	4
PC 32:1	PC	Positive	M+H	732.554	4.26	PC 15:0/18:1-d7	0.0206636	0.688	0.6255	0.623	0.548	0.594	0.678	0.553	0.603	0.598	0.72	0.694	0.553	0.73	0.567	0.629	0.765	0.581	0.647	0.648	0.639	0.632	0.618	0.594	0.564	0.637	0.604	0.574	0.647	0.553	0.595	0.581	0.564	0.55	0.659	0.576
PC 32:2	PC	Positive	M+H	730.538	3.93	PC 15:0/18:1-d7	0.010821	0.0592	0.06465	0.0693	0.0559	0.0741	0.072	0.0629	0.0682	0.056	0.0801	0.0584	0.0537	0.0792	0.0548	0.0719	0.0721	0.0586	0.0668	0.0679	0.0705	0.066	0.0644	0.0699	0.0613	0.0778	0.0661	0.052	0.0745	0.0559	0.0672	0.0588	0.0595	0.0584	0.0618	0.0654
PC 33:0	PC	Positive	M+H	748.585	4.8	PC 15:0/18:1-d7	0.00200255	0.0493	0.04355	0.03995	0.0399	0.0444	0.0577	0.0451	0.0355	0.0446	0.049	0.046	0.0432	0.0512	0.043	0.0441	0.0592	0.045	0.0422	0.0488	0.0431	0.0482	0.0462	0.0368	0.0428	0.042	0.0462	0.039	0.0417	0.0447	0.0468	0.0519	0.043	0.0388	0.043	0.0412
PC 33:1	PC	Positive	M+H	746.569	4.47	PC 15:0/18:1-d7	0.00421267	0.04765	0.0465	0.0465	0.04125	0.04515	0.0497	0.0413	0.0459	0.0438	0.0483	0.0496	0.0421	0.0491	0.0432	0.0494	0.0517	0.0423	0.0465	0.0463	0.043	0.0516	0.0424	0.0456	0.0442	0.0413	0.048	0.041	0.0438	0.0412	0.0441	0.0535	0.0394	0.0401	0.0441	0.0439
PC 33:2	PC	Positive	M+H	744.554	4.14	PC 15:0/18:1-d7	0.0167712	0.0109	0.0113	0.01265	0.0116	0.01175	0.0117	0.0108	0.0107	0.0116	0.014	0.0116	0.00984	0.0123	0.0129	0.0119	0.0129	0.0101	0.0118	0.0129	0.0112	0.01	0.00966	0.0114	0.0116	0.0113	0.0105	0.00965	0.0119	0.011	0.0106	0.0104	0.00973	0.00928	0.0107	0.0106
PC 33:3	PC	Positive	M+H	742.538	3.77	PC 15:0/18:1-d7	0.0350609	0.03655	0.04005	0.0584	0.04705	0.03125	0.0324	0.0406	0.0545	0.0498	0.0341	0.0287	0.0361	0.0564	0.0492	0.0281	0.0386	0.0352	0.0541	0.0517	0.0298	0.0369	0.0345	0.0638	0.0442	0.0321	0.0349	0.0357	0.0512	0.0478	0.0325	0.0362	0.0407	0.0402	0.047	0.0286
PC 34:0	PC	Positive	M+H	762.601	5.1	PC 15:0/18:1-d7	0.00486313	0.286	0.3315	0.2595	0.2705	0.317	0.355	0.316	0.254	0.316	0.359	0.261	0.315	0.338	0.324	0.336	0.332	0.329	0.27	0.35	0.323	0.298	0.34	0.277	0.3	0.326	0.3	0.288	0.278	0.285	0.339	0.309	0.324	0.251	0.327	0.305
PC 34:1	PC	Positive	M+H	760.585	4.69	PC 15:0/18:1-d7	0.00368974	3.105	3.14	3.2	2.89	2.765	3.28	2.69	3.02	3.28	2.82	2.62	3.05	3.85	3.16	2.68	3.54	2.85	3.18	3.7	2.42	3.1	2.74	3.11	3.17	2.65	2.83	2.62	2.82	3.05	2.67	3.13	3.02	2.7	3.37	2.49
PC 34:2	PC	Positive	M+H	758.569	4.33	PC 15:0/18:1-d7	0.0174341	1.805	2.195	2.505	2.455	1.435	1.97	2.02	2.39	2.71	1.82	1.78	2	2.91	2.51	1.55	1.91	1.95	2.8	3	1.56	1.71	2.06	2.46	2.57	1.48	1.4	1.87	2.71	2.8	1.36	1.48	1.96	2.14	2.8	1.46
PC 34:3	PC	Positive	M+H	756.554	4.03	PC 15:0/18:1-d7	0.0449505	0.08445	0.0999	0.117	0.10595	0.09065	0.0999	0.0983	0.116	0.103	0.0981	0.0745	0.082	0.126	0.11	0.0893	0.1	0.0867	0.11	0.119	0.0886	0.0829	0.0917	0.113	0.107	0.0943	0.0857	0.0819	0.115	0.097	0.0841	0.0786	0.0897	0.0926	0.106	0.085
PC 34:4	PC	Positive	M+H	754.538	3.9	PC 15:0/18:1-d7	0.0171765	0.03085	0.03295	0.03525	0.03055	0.03675	0.0347	0.0331	0.0347	0.0291	0.0403	0.0265	0.0306	0.0329	0.03	0.0378	0.0353	0.0283	0.031	0.0335	0.0334	0.0334	0.0305	0.0363	0.0305	0.0418	0.0317	0.0292	0.0358	0.0296	0.035	0.0273	0.0321	0.029	0.0338	0.0333
PC 35:0	PC	Positive	M+H	776.616	5.3	PC 15:0/18:1-d7	0.00113955	0.003865	0.003845	0.003035	0.00319	0.00376	0.00433	0.00343	0.00312	0.00344	0.00421	0.00385	0.00382	0.00396	0.00375	0.00375	0.0041	0.00387	0.00359	0.00371	0.00387	0.00384	0.00378	0.00342	0.00347	0.00413	0.00363	0.00316	0.00333	0.00311	0.00411	0.00413	0.00362	0.00299	0.00352	0.00354
PC 35:1	PC	Positive	M+H	774.601	4.94	PC 15:0/18:1-d7	0.00233028	0.0345	0.0334	0.03305	0.0305	0.03105	0.0393	0.0315	0.0297	0.0321	0.0338	0.0328	0.0318	0.0382	0.0344	0.0326	0.0371	0.032	0.0344	0.0368	0.0311	0.0338	0.035	0.0312	0.0323	0.0313	0.0327	0.0304	0.032	0.0337	0.0312	0.0357	0.0323	0.0276	0.0352	0.0258
PC 35:2	PC	Positive	M+H	772.585	4.56	PC 15:0/18:1-d7	0.00669857	0.02045	0.02345	0.0289	0.0268	0.02005	0.0208	0.0227	0.0243	0.0303	0.0191	0.0195	0.0209	0.028	0.0287	0.016	0.022	0.0211	0.0285	0.0324	0.0186	0.0255	0.0203	0.0294	0.0286	0.0175	0.0217	0.0217	0.0273	0.0274	0.0184	0.0211	0.0224	0.021	0.0265	0.0177
PC 35:3	PC	Positive	M+H	770.569	4.23	PC 15:0/18:1-d7	0.0192889	0.0043	0.004675	0.00543	0.00491	0.00458	0.00454	0.00416	0.00549	0.00504	0.00416	0.00462	0.0038	0.00597	0.0058	0.0042	0.0053	0.00445	0.0057	0.00567	0.00469	0.00405	0.00448	0.00524	0.00502	0.00424	0.00379	0.00403	0.00559	0.00482	0.00344	0.00384	0.00375	0.0047	0.00522	0.00361
PC 35:4	PC	Positive	M+H	768.554	4.08	PC 15:0/18:1-d7	0.0143207	0.0114	0.01125	0.01114	0.01094	0.00945	0.012	0.0104	0.0108	0.0107	0.0109	0.0104	0.00888	0.0123	0.0112	0.0105	0.0138	0.00933	0.0104	0.0117	0.0101	0.0105	0.00954	0.0104	0.0103	0.0111	0.0111	0.00903	0.0102	0.0112	0.00969	0.0101	0.00972	0.00807	0.0112	0.00856
PC 36:0	PC	Positive	M+H	790.632	5.62	PC 15:0/18:1-d7	0.0344783	0.009695	0.0115	0.009275	0.009105	0.0115	0.0116	0.0104	0.00936	0.0101	0.0134	0.01	0.0123	0.0114	0.0101	0.0121	0.0118	0.0121	0.0101	0.0132	0.0108	0.0102	0.0111	0.00937	0.0104	0.0122	0.0118	0.0103	0.00962	0.0107	0.014	0.0118	0.0122	0.0101	0.0119	0.0116
PC 36:1	PC	Positive	M+H	788.616	5.21	PC 15:0/18:1-d7	0.016839	0.3645	0.3995	0.368	0.369	0.384	0.427	0.384	0.337	0.417	0.417	0.354	0.383	0.461	0.41	0.401	0.426	0.376	0.39	0.468	0.389	0.373	0.411	0.391	0.399	0.391	0.374	0.339	0.386	0.368	0.384	0.379	0.397	0.332	0.431	0.365
PC 36:2	PC	Positive	M+H	786.601	4.81	PC 15:0/18:1-d7	0.0158929	1.0915	1.2	1.38	1.345	1.025	1.21	1.23	1.25	1.46	1.1	0.94	1.14	1.71	1.45	0.987	1.27	1.16	1.38	1.62	0.947	1.09	1.24	1.32	1.38	0.952	0.958	1.05	1.44	1.46	1.01	1.07	1.17	1.27	1.39	0.945
PC 36:3	PC	Positive	M+H	784.585	4.46	PC 15:0/18:1-d7	0.0251605	0.699	0.877	1.0545	0.9025	0.635	0.773	0.751	0.99	0.887	0.651	0.692	0.748	1.08	0.863	0.659	0.767	0.769	1.09	0.968	0.621	0.723	0.839	0.991	0.99	0.607	0.685	0.715	1.02	0.996	0.593	0.656	0.724	0.822	0.975	0.631
PC 36:4	PC	Positive	M+H	782.569	4.28	PC 15:0/18:1-d7	0.0247351	2.62	3.055	3.265	3.3	1.925	2.58	2.61	3.11	3.47	2.36	2.23	2.51	3.54	3.3	2.05	2.85	2.57	3.15	3.71	2.09	2.47	3.03	3.15	3.37	2.2	2.34	2.67	3.14	3.13	1.95	1.91	2.51	2.8	4.03	1.86
PC 36:5	PC	Positive	M+H	780.554	3.98	PC 15:0/18:1-d7	0.00674633	0.1485	0.166	0.2105	0.1755	0.134	0.179	0.169	0.206	0.175	0.144	0.13	0.14	0.223	0.17	0.122	0.18	0.139	0.188	0.207	0.129	0.168	0.164	0.219	0.197	0.141	0.168	0.131	0.224	0.168	0.119	0.133	0.143	0.175	0.191	0.119
PC 36:6	PC	Positive	M+H	778.538	3.74	PC 15:0/18:1-d7	0.0866067	0.00592	0.006785	0.007845	0.006235	0.00644	0.00747	0.00735	0.00772	0.00691	0.00666	0.00563	0.00574	0.00848	0.00772	0.00646	0.00694	0.00583	0.00816	0.00808	0.0068	0.00545	0.00604	0.00726	0.00651	0.00633	0.00552	0.00536	0.00756	0.00651	0.00612	0.0056	0.00585	0.00632	0.00636	0.00599
PC 37:1	PC	Positive	M+H	802.632	5.48	PC 15:0/18:1-d7	0.0532188	0.003875	0.00421	0.00374	0.003375	0.00397	0.00424	0.00381	0.00325	0.00365	0.00424	0.00366	0.00397	0.00427	0.00414	0.00381	0.0046	0.00364	0.00399	0.00444	0.00359	0.00389	0.00376	0.00361	0.00366	0.00414	0.00358	0.00335	0.00353	0.00326	0.00404	0.00373	0.00398	0.0032	0.00366	0.00374
PC 37:2	PC	Positive	M+H	800.616	5.06	PC 15:0/18:1-d7	0.00457761	0.00841	0.009245	0.009625	0.00867	0.00901	0.00935	0.00933	0.00896	0.00903	0.0103	0.00756	0.00898	0.0119	0.00961	0.00878	0.00984	0.00917	0.01	0.0107	0.00895	0.00882	0.00918	0.0101	0.009	0.00866	0.00842	0.00867	0.01	0.00878	0.00887	0.00853	0.0084	0.0085	0.0107	0.00826
PC 37:3	PC	Positive	M+H	798.601	4.66	PC 15:0/18:1-d7	0.0332999	0.002315	0.001715	0.002225	0.00281	0.002105	0.00176	0.00219	0.00233	0.00198	0.00202	0.00148	0.00173	0.00416	0.00225	0.00146	0.00201	0.00158	0.00323	0.00257	0.00173	0.00189	0.00244	0.00262	0.00222	0.00199	0.00227	0.00193	0.00245	0.00232	0.00149	0.00135	0.00143	0.00201	0.00231	0.00246
PC 37:4	PC	Positive	M+H	796.585	4.51	PC 15:0/18:1-d7	0.0239743	0.03605	0.04075	0.04035	0.04165	0.0318	0.0379	0.0365	0.0371	0.0432	0.0331	0.0329	0.0338	0.0394	0.0454	0.03	0.043	0.0361	0.0393	0.0426	0.0289	0.0412	0.035	0.0405	0.042	0.0307	0.036	0.0356	0.0379	0.04	0.0304	0.0367	0.0349	0.0353	0.0422	0.03
PC 37:6	PC	Positive	M+H	792.554	3.93	PC 15:0/18:1-d7	0.0148233	0.003045	0.00308	0.00247	0.002845	0.00284	0.00371	0.00297	0.00228	0.00266	0.00296	0.00251	0.00257	0.00251	0.00279	0.00299	0.00399	0.00257	0.00235	0.00321	0.00258	0.00369	0.00292	0.00264	0.0031	0.00311	0.00365	0.00215	0.00255	0.00243	0.00222	0.00272	0.00255	0.00206	0.00296	0.00235
PC 38:0	PC	Positive	M+H	818.663	6.21	PC 15:0/18:1-d7	0.0562589	0.001705	0.002115	0.001625	0.001615	0.00218	0.00228	0.00194	0.00131	0.00193	0.00215	0.00183	0.00199	0.00217	0.00173	0.00209	2.66e-05	0.0022	0.00184	0.00211	0.00213	0.00186	0.00224	0.00154	0.00193	0.00215	0.00202	0.00189	0.00164	3.03e-05	0.00212	0.00201	0.00205	0.00154	0.00228	0.00165
PC 38:1	PC	Positive	M+H	816.648	5.68	PC 15:0/18:1-d7	0.00783177	0.01805	0.0179	0.01595	0.0152	0.01955	0.0201	0.0165	0.0146	0.0167	0.0219	0.0169	0.0195	0.0199	0.0168	0.0201	0.0212	0.0181	0.0163	0.0199	0.0178	0.0182	0.0172	0.0158	0.0162	0.0183	0.0196	0.0161	0.0155	0.0156	0.0197	0.0194	0.0182	0.0159	0.0181	0.0174
PC 38:2	PC	Positive	M+H	814.632	5.24	PC 15:0/18:1-d7	0.0261446	0.0508	0.053	0.05135	0.045	0.05795	0.0566	0.0489	0.048	0.0523	0.0584	0.0474	0.0495	0.0602	0.0498	0.056	0.0569	0.0495	0.0531	0.0578	0.0542	0.0503	0.0528	0.0537	0.0506	0.0572	0.0489	0.0437	0.0518	0.0449	0.0549	0.0507	0.0479	0.0456	0.0507	0.0541
PC 38:3	PC	Positive	M+H	812.616	4.93	PC 15:0/18:1-d7	0.0247745	0.14	0.157	0.177	0.145	0.168	0.161	0.154	0.161	0.144	0.176	0.12	0.144	0.2	0.149	0.16	0.157	0.149	0.179	0.175	0.158	0.136	0.161	0.172	0.161	0.165	0.132	0.135	0.17	0.162	0.151	0.133	0.143	0.153	0.17	0.146
PC 38:4	PC	Positive	M+H	810.601	4.75	PC 15:0/18:1-d7	0.0124265	1.325	1.5	1.53	1.55	1.23	1.3	1.3	1.49	1.63	1.26	0.913	1.34	1.56	1.57	1.29	1.46	1.24	1.36	1.97	1.07	1.37	1.36	1.38	1.56	1.24	1.21	1.32	1.37	1.47	1.22	1.19	1.45	1.27	1.7	1.16
PC 38:5	PC	Positive	M+H	808.585	4.39	PC 15:0/18:1-d7	0.000843581	0.9685	0.962	0.977	0.869	0.7995	1.05	0.87	0.907	0.968	0.962	0.827	0.87	1.03	0.872	0.831	1.02	0.806	1.01	1.04	0.819	0.953	0.899	0.926	0.96	0.829	0.796	0.831	1	1.02	0.735	0.747	0.828	0.801	1.06	0.806
PC 38:6	PC	Positive	M+H	806.569	4.14	PC 15:0/18:1-d7	0.0374532	0.4065	0.424	0.391	0.405	0.4045	0.441	0.403	0.363	0.379	0.457	0.34	0.35	0.386	0.427	0.387	0.462	0.345	0.347	0.429	0.379	0.388	0.375	0.373	0.397	0.408	0.397	0.344	0.364	0.363	0.361	0.347	0.357	0.293	0.395	0.376
PC 38:7	PC	Positive	M+H	804.554	3.85	PC 15:0/18:1-d7	0.0405391	0.01225	0.01095	0.01205	0.010125	0.0108	0.0128	0.0108	0.0105	0.00976	0.012	0.00896	0.00902	0.0102	0.00991	0.011	0.0128	0.00864	0.0104	0.0115	0.00904	0.0121	0.00958	0.0114	0.0106	0.0123	0.0109	0.00977	0.0105	0.00923	0.0104	0.00952	0.00939	0.00908	0.011	0.0117
PC 39:2	PC	Positive	M+H	828.648	5.6	PC 15:0/18:1-d7	0.0907662	0.000375	0.0005475	0.0004295	0.0003075	0.0005245	0.000739	0.000524	0.00032	0.000523	0.000511	0.000415	0.000475	0.000616	0.000427	0.000718	0.000662	0.000557	0.000516	0.000508	0.000625	0.000574	0.0006	0.000453	0.000439	0.00062	0.000273	0.000481	0.000388	0.000488	0.00049	0.000601	0.000402	0.000445	0.00044	5.96e-05
PC 39:4	PC	Positive	M+H	824.616	5.01	PC 15:0/18:1-d7	0.0610592	0.008625	0.010015	0.009335	0.00889	0.00934	0.00968	0.00921	0.00831	0.00853	0.00977	0.00707	0.00877	0.0105	0.00991	0.00863	0.00962	0.00856	0.00935	0.01	0.00806	0.0097	0.0102	0.00943	0.00934	0.00909	0.0087	0.00823	0.00884	0.00921	0.00835	0.00762	0.00926	0.00824	0.0107	0.00771
PC 39:5	PC	Positive	M+H	822.601	4.55	PC 15:0/18:1-d7	0.0517166	0.006435	0.0066	0.006025	0.00563	0.00625	0.00622	0.0058	0.00568	0.00583	0.00644	0.00459	0.00543	0.00579	0.00557	0.00575	0.00732	0.00463	0.0065	0.00612	0.00598	0.00571	0.00544	0.00638	0.00546	0.00774	0.00627	0.00556	0.00519	0.00636	0.00599	0.00605	0.00579	0.00457	0.00614	0.00542
PC 39:6	PC	Positive	M+H	820.585	4.31	PC 15:0/18:1-d7	0.0259275	0.00201	0.002025	0.001425	0.001315	0.001945	0.00333	0.00174	0.00168	0.00222	0.00267	0.00204	0.00211	0.00105	0.0019	0.00197	0.00302	0.00156	0.00121	0.00209	0.00181	0.00296	0.00189	0.00158	0.00235	0.00202	0.00173	0.00197	0.00166	0.0028	0.00146	0.00195	0.00115	0.00115	0.00232	0.00215
PC 40:0	PC	Positive	M+H	846.695	6.81	PC 15:0/18:1-d7	0.0549851	0.0032	0.003325	0.002845	0.00266	0.003295	0.00339	0.00298	0.00229	0.00315	0.00338	0.00305	0.00335	0.00346	0.00307	0.00315	0.00362	0.00349	0.00259	0.00358	0.00322	0.00284	0.0035	0.00266	2.48e-05	0.00361	0.00267	0.00281	0.00296	0.00255	0.00342	0.00291	0.0032	0.00256	0.00285	0.00249
PC 40:1	PC	Positive	M+H	844.679	6.34	PC 15:0/18:1-d7	0.0191133	0.00739	0.00706	0.006595	0.00605	0.007665	0.00851	0.00707	0.00563	0.00717	0.00819	0.00664	0.00709	0.00798	0.00711	0.00768	0.00862	0.00717	0.00657	0.00753	0.00734	0.00743	0.00718	0.0064	0.0064	0.00772	0.0071	0.00691	0.00638	0.00563	0.00765	0.00726	0.00682	0.00592	0.00702	0.00655
PC 40:2	PC	Positive	M+H	842.663	5.9	PC 15:0/18:1-d7	0.00414035	0.008405	0.008225	0.007325	0.00687	0.00874	0.0089	0.00777	0.00624	0.00787	0.00923	0.00756	0.00768	0.00863	0.00737	0.0082	0.00961	0.00718	0.00766	0.00814	0.00878	0.00822	0.0072	0.00745	0.00673	0.00875	0.0086	0.00671	0.00725	0.00677	0.00892	0.0076	0.00726	0.00702	0.00729	0.00809
PC 40:4	PC	Positive	M+H	838.632	5.25	PC 15:0/18:1-d7	0.139358	0.07595	0.0821	0.07325	0.05505	0.08665	0.0887	0.0761	0.0709	0.0698	0.0955	0.0353	0.0759	0.079	0.0744	0.0903	0.0913	0.0722	0.0655	0.0772	0.0885	0.0799	0.0799	0.0718	0.0724	0.0839	0.0789	0.0687	0.0666	0.0407	0.0824	0.0766	0.0707	0.0601	0.0762	0.081
PC 40:6	PC	Positive	M+H	834.601	4.56	PC 15:0/18:1-d7	0.0183133	0.10625	0.1105	0.0995	0.1064	0.1095	0.0985	0.107	0.085	0.114	0.118	0.0876	0.0933	0.1	0.112	0.0958	0.123	0.0989	0.0992	0.115	0.0993	0.116	0.0958	0.108	0.0989	0.103	0.105	0.1	0.0903	0.102	0.112	0.105	0.103	0.0762	0.111	0.102
PC 40:7	PC	Positive	M+H	832.585	4.2	PC 15:0/18:1-d7	0.00541961	0.0994	0.0949	0.0892	0.08215	0.09585	0.11	0.091	0.0807	0.0828	0.102	0.0853	0.0782	0.0843	0.0809	0.0934	0.112	0.0791	0.0755	0.0866	0.0946	0.0994	0.0872	0.082	0.0893	0.0929	0.0944	0.0781	0.0807	0.072	0.0852	0.0839	0.0727	0.0736	0.0865	0.0923
PC 40:8	PC	Positive	M+H	830.569	3.93	PC 15:0/18:1-d7	0.00264061	0.0843	0.0923	0.0782	0.077	0.08015	0.0974	0.0904	0.0747	0.0721	0.0884	0.069	0.0759	0.0742	0.0733	0.0793	0.101	0.078	0.0649	0.0858	0.0734	0.0964	0.0898	0.081	0.0831	0.0905	0.0964	0.0745	0.0783	0.0738	0.0756	0.0732	0.0812	0.0644	0.0904	0.0748
PC 42:10	PC	Positive	M+H	854.569	3.81	PC 15:0/18:1-d7	0.0317866	0.01205	0.010695	0.009585	0.00951	0.01009	0.0126	0.0104	0.00845	0.00925	0.0119	0.00791	0.00814	0.00878	0.00938	0.00983	0.0125	0.00797	0.00788	0.0103	0.00864	0.0117	0.0097	0.00967	0.00976	0.0117	0.0108	0.00903	0.00816	0.00854	0.00975	0.00942	0.00973	0.00748	0.00985	0.0103
PC 42:2	PC	Positive	M+H	870.695	6.47	PC 15:0/18:1-d7	0.0326139	0.0035	0.00316	0.002825	0.002475	0.003475	0.0033	0.00275	0.0025	0.00308	0.00386	0.00273	0.00302	0.00413	0.00305	0.0031	0.00395	0.00319	0.00314	0.00315	0.00348	0.00322	0.00297	0.00319	0.00286	0.0035	0.00339	0.00265	0.00281	0.00271	0.00372	0.00343	0.00306	0.00286	0.00301	0.00355
PC 42:4	PC	Positive	M+H	866.663	5.6	PC 15:0/18:1-d7	0.0100594	0.01034	0.0108	0.009265	0.008725	0.01085	0.0116	0.00908	0.00801	0.00926	0.0121	0.0085	0.00901	0.0102	0.00956	0.0113	0.0123	0.00883	0.00979	0.0107	0.00998	0.0101	0.00979	0.0093	0.00853	0.0117	0.00976	0.00849	0.00832	0.00775	0.0101	0.00975	0.00891	0.00801	0.00923	0.00997
PC 42:5	PC	Positive	M+H	864.648	5.1	PC 15:0/18:1-d7	0.052496	0.021	0.0215	0.0173	0.01715	0.0229	0.024	0.0205	0.0158	0.0202	0.0214	0.0162	0.0189	0.0177	0.0199	0.021	0.0214	0.0185	0.0168	0.0207	0.021	0.0206	0.0201	0.0186	0.0196	0.0226	0.019	0.0174	0.0165	0.0171	0.0212	0.0175	0.018	0.0156	0.0196	0.0214
PC 42:7	PC	Positive	M+H	860.616	4.62	PC 15:0/18:1-d7	0.000205892	0.0182	0.01695	0.0171	0.0148	0.01955	0.0172	0.0157	0.015	0.0145	0.0209	0.0143	0.0149	0.016	0.0141	0.0176	0.0176	0.0141	0.0149	0.0152	0.0195	0.0189	0.00851	0.0179	0.014	0.0199	0.0173	0.0145	0.0143	0.0146	0.0195	0.0161	0.0154	0.0131	0.0159	0.0185
PC 42:8	PC	Positive	M+H	858.601	4.23	PC 15:0/18:1-d7	0.0142404	0.03165	0.03375	0.02785	0.0275	0.0335	0.032	0.0294	0.0249	0.0297	0.0365	0.0245	0.0287	0.0264	0.0253	0.0322	0.0372	0.0267	0.0212	0.0275	0.0315	0.0307	0.0301	0.0264	0.0279	0.0331	0.0313	0.0307	0.0262	0.0254	0.0277	0.025	0.0284	0.0239	0.0314	0.0317
PC 44:10	PC	Positive	M+H	882.601	4.23	PC 15:0/18:1-d7	0.0646856	0.003675	0.003595	0.002495	0.002565	0.003065	0.00408	0.00364	0.00237	0.00227	0.00388	0.00296	0.003	0.00215	0.00238	0.00323	0.00388	0.0026	0.00201	0.00251	0.00303	0.00316	0.00367	0.00233	0.00236	0.00344	0.00394	0.0024	0.0021	0.00244	0.00319	0.0025	0.00278	0.00176	0.00269	0.00289
PC 44:11	PC	Positive	M+H	880.585	3.91	PC 15:0/18:1-d7	0.0413437	0.001865	0.002035	0.00208	0.001805	0.00204	0.00202	0.00197	0.00195	0.00156	0.00202	0.00142	0.00175	0.00184	0.00155	0.00177	0.00206	0.00159	0.00164	0.00183	0.00169	0.00232	0.00191	0.00209	0.00182	0.00192	0.00227	0.00131	0.0021	0.00147	0.00159	0.00155	0.00148	0.00145	0.00201	0.00209
PC 44:2	PC	Positive	M+H	898.726	7.05	PC 15:0/18:1-d7	0.0633783	0.0007045	0.000414	0.0004105	0.0002397	0.000847	6.61e-05	0.000393	0.000183	0.000525	6.6e-05	0.000499	0.000177	0.000576	0.000149	0.00067	0.000586	0.000387	0.000759	0.000654	5.71e-05	0.000125	0.000463	0.00077	0.000676	3.13e-05	2.92e-05	0.000313	0.000527	0.000217	0.000491	0.00105	0.000536	0.000481	0.000432	0.000942
PC 44:4	PC	Positive	M+H	894.695	6.35	PC 15:0/18:1-d7	0.0165955	0.00312	0.00304	0.00298	0.00318	0.00338	0.00329	0.00285	0.00303	0.00332	0.00399	0.00223	0.00319	0.00297	0.00317	0.00278	0.00311	0.00275	0.00291	0.0034	0.00285	0.00293	0.00346	0.00351	0.0029	0.00306	0.00293	0.00276	0.0025	0.00276	0.00311	0.00245	0.0028	0.00291	0.00345	0.00176
PC 44:5	PC	Positive	M+H	892.679	5.81	PC 15:0/18:1-d7	0.0597643	0.0068	0.007	0.00655	0.00652	0.00672	0.00808	0.00664	0.00547	0.00645	0.00682	0.00488	0.00682	0.00701	0.00667	0.00147	0.00795	0.00572	0.00638	0.00684	0.00678	0.00744	0.006	0.00692	0.00598	0.00702	0.00677	0.00587	0.006	0.00587	0.00683	0.00608	0.00526	0.00533	0.00661	0.0061
PC 44:8	PC	Positive	M+H	886.632	4.58	PC O-18:0/18:1-d9	0.00603024	0.02355	0.0215	0.01685	0.0198	0.0249	0.0229	0.0211	0.016	0.0202	0.026	0.0175	0.0189	0.0168	0.0206	0.0212	0.0237	0.0186	0.0154	0.0203	0.0212	0.023	0.0193	0.0195	0.0188	0.0256	0.0224	0.0199	0.0162	0.0203	0.0255	0.022	0.0214	0.0131	0.0196	0.0225
PC O-16:0_16:0	PC-O	Positive	M+H	720.59	4.94	PC O-18:0/18:1-d9	0.0374059	5.23	6.2	5.84	4.51	5.37	4.7	4.99	4.18	3.9	5.43	5.84	5.09	5.07	4.71	5.62	4.38	5.51	4.77	4.63	5.7	4.76	5.39	4.17	4.78	5.11	4.87	5.24	4.99	5.39	6.5	5.31	5.69	4.23	5	5.16
PC O-16:0_18:2	PC-O	Positive	M+H	744.59	5.02	PC O-18:0/18:1-d9	0.0107347	0.07115	0.09025	0.0855	0.081	0.0621	0.061	0.0622	0.0564	0.0689	0.0684	0.0663	0.0641	0.0648	0.085	0.0568	0.0642	0.0548	0.0653	0.0745	0.0568	0.0704	0.0769	0.0623	0.0901	0.0542	0.0685	0.0577	0.062	0.0762	0.0628	0.0591	0.066	0.0651	0.0959	0.0635
PC O-16:0_20:4	PC-O	Positive	M+H	768.59	4.59	PC O-18:0/18:1-d9	0.0396621	4.2	4.57	4.27	3.81	3.99	3.14	3.91	3.12	3.49	3.85	3.83	3.67	3.25	3.65	3.53	3.29	3.9	3.35	3.66	4.01	3.62	3.8	3.41	3.73	3.83	3.9	4.02	3.62	4.43	4.79	4.05	4.71	2.85	3.67	4.29
PC O-16:1_16:0	PC-O	Positive	M+H	718.575	4.89	PC O-18:0/18:1-d9	0.0206468	0.389	0.457	0.464	0.37	0.3525	0.333	0.343	0.334	0.326	0.339	0.358	0.311	0.351	0.348	0.369	0.347	0.346	0.358	0.323	0.363	0.323	0.39	0.311	0.373	0.306	0.351	0.354	0.352	0.392	0.397	0.339	0.376	0.302	0.397	0.32
PC O-16:1_18:1	PC-O	Positive	M+H	744.59	4.66	PC O-18:0/18:1-d9	0.0314246	1.575	1.67	1.81	1.33	1.675	1.35	1.28	1.33	1.25	1.52	1.61	1.39	1.54	1.24	1.52	1.38	1.43	1.39	1.25	1.67	1.35	1.39	1.32	1.37	1.53	1.46	1.32	1.39	1.54	1.94	1.54	1.65	1.25	1.35	1.85
PC O-16:1_18:2	PC-O	Positive	M+H	742.575	4.6	PC O-18:0/18:1-d9	0.0323749	0.0516	0.0596	0.1152	0.1035	0.02795	0.0372	0.0568	0.087	0.0878	0.0328	0.0387	0.0399	0.0745	0.0945	0.0268	0.0403	0.0568	0.0927	0.0991	0.0245	0.0485	0.0633	0.0913	0.115	0.0121	0.0495	0.0472	0.102	0.123	0.0246	0.042	0.065	0.0773	0.0972	0.0281
PC O-16:1_20:4	PC-O	Positive	M+H	766.575	4.53	PC O-18:0/18:1-d9	0.046452	1.125	1.62	2.075	2.035	0.8315	0.913	1.25	1.41	1.8	0.812	1.07	1.12	1.53	1.91	0.787	1.03	1.29	1.57	1.66	0.83	1.08	1.21	1.55	1.85	0.713	1.07	1.33	1.52	1.89	0.925	1.03	1.36	1.36	1.97	0.882
PC O-18:0_20:4	PC-O	Positive	M+H	796.621	5.1	PC O-18:0/18:1-d9	0.011302	1.09	1.42	1.125	0.997	1.145	1.09	1.07	0.862	0.992	1.15	0.957	1.04	0.931	1.03	1.19	0.944	1.14	0.808	1.02	1.2	0.959	1.17	0.843	1.13	1.04	1.08	1.1	0.925	1.07	1.21	0.987	1.19	0.873	1.17	1.16
PC O-18:1_18:1	PC-O	Positive	M+H	772.621	5.16	PC O-18:0/18:1-d9	0.0095553	1.0265	1.105	1.0325	0.858	0.977	0.99	0.887	0.787	0.846	0.972	1.07	0.861	0.935	0.849	1.06	0.896	0.949	0.841	0.871	1.08	0.912	0.977	0.788	0.9	0.952	1.01	0.894	0.937	0.912	1.15	1.01	1.02	0.804	0.949	1.04
PC O-18:1_18:2	PC-O	Positive	M+H	770.606	4.75	PC O-18:0/18:1-d9	0.0101721	1.075	1.11	1.18	0.854	1.105	0.874	0.802	0.814	0.787	1.05	0.915	0.883	0.948	0.768	1.15	0.868	0.863	0.898	0.911	1.01	0.945	0.853	0.789	0.839	1.04	0.935	0.926	0.939	0.855	1.29	0.946	1.03	0.863	0.888	1.12
PC O-18:1_20:4	PC-O	Positive	M+H	794.606	4.65	PC O-18:0/18:1-d9	0.0249986	10.45	12.1	11	9.09	9.65	9.06	8.87	8.11	8.55	8.78	9.44	9.46	8.6	8.54	8.43	9.3	9.39	7.64	8.11	9.93	8.78	9.52	7.76	9.94	8.63	9.44	8.87	7.64	10.2	10.6	8.66	10.7	7.31	9.48	10.4
PC O2-38:8	PC-O	Positive	M+H	772.564	5.34	PC O-18:0/18:1-d9	0.00128953	0.002525	0.00489	0.003135	0.00543	0.004655	0.0042	0.00442	0.00278	0.0042	0.0023	0.00512	0.00414	0.00322	0.00269	0.00493	0.00493	0.00403	0.00356	0.00454	0.00408	0.00562	0.00395	0.00243	0.00471	0.00429	0.00498	0.00441	0.00233	0.00298	0.00534	0.00535	0.00533	0.00115	0.00281	0.00306
PC O-32:2	PC-O	Positive	M+H	716.559	4.6	PC O-18:0/18:1-d9	0.0161113	0.008185	0.0158	0.0202	0.007555	0.00984	0.0101	0.0117	0.00901	0.0105	0.00513	0.0059	0.00718	0.0134	0.0132	0.00342	0.0164	0.0194	0.0153	0.00306	0.00804	0.0107	0.00432	0.00306	0.0111	0.0151	0.0149	0.0113	0.0103	0.0111	0.00624	0.0251	0.011	0.0105	0.0158	0.00577
PC O-33:1	PC-O	Positive	M+H	732.59	4.59	PC O-18:0/18:1-d9	0.0303176	0.167	0.168	0.1885	0.139	0.1595	0.152	0.132	0.134	0.125	0.152	0.196	0.133	0.167	0.125	0.143	0.155	0.148	0.151	0.14	0.158	0.15	0.165	0.137	0.139	0.13	0.163	0.14	0.159	0.176	0.187	0.17	0.162	0.153	0.134	0.151
PC O-34:4	PC-O	Positive	M+H	740.559	4.34	PC O-18:0/18:1-d9	0.048615	0.02315	0.03035	0.02635	0.0219	0.0274	0.018	0.0259	0.0191	0.02	0.0262	0.0232	0.0199	0.0202	0.0237	0.0264	0.0154	0.0257	0.0189	0.0199	0.0288	0.0199	0.0234	0.0211	0.0224	0.0229	0.0175	0.0218	0.0178	0.0217	0.0219	0.0196	0.0238	0.0186	0.0249	0.0272
PC O-36:0	PC-O	Positive	M+H	776.653	4.9	PC O-18:0/18:1-d9	0.00508211	0.08965	0.096	0.0883	0.07515	0.0905	0.0839	0.0715	0.068	0.0694	0.0909	0.104	0.0778	0.0829	0.0716	0.0875	0.0829	0.0859	0.0746	0.0729	0.0901	0.074	0.0871	0.0664	0.0769	0.0817	0.0858	0.073	0.0809	0.0824	0.107	0.0897	0.0824	0.0674	0.0819	0.0808
PC O-37:4	PC-O	Positive	M+H	782.606	4.86	PC O-18:0/18:1-d9	6.27626e-05	0.053	0.0591	0.0575	0.04425	0.05765	0.0546	0.0562	0.0394	0.0418	0.0536	0.0564	0.056	0.0551	0.0479	0.0528	0.0565	0.0553	0.0419	0.0493	0.0513	0.0492	0.0601	0.0366	0.0555	0.0489	0.0481	0.0558	0.0496	0.0628	0.0597	0.0577	0.0552	0.0427	0.0537	0.0579
PC O-37:6	PC-O	Positive	M+H	778.575	4.5	PC O-18:0/18:1-d9	0.0214461	0.003345	0.004225	0.002305	0.00288	0.003805	0.000917	0.00369	0.000714	0.00312	0.00313	0.00346	0.00209	0.002	0.000534	0.00191	0.00329	0.00277	0.000994	0.00227	0.0041	0.00213	0.00359	0.00187	0.00434	0.00203	0.00469	0.00379	0.00291	0.00108	0.00126	0.00205	0.0021	0.00348	0.00253	0.00179
PC O-38:1	PC-O	Positive	M+H	802.668	4.9	PC O-18:0/18:1-d9	0.0108805	0.0813	0.0885	0.0793	0.0705	0.0791	0.0768	0.0687	0.0583	0.0617	0.0823	0.0937	0.0718	0.0764	0.0687	0.0753	0.0737	0.0815	0.0612	0.0713	0.0788	0.0733	0.0748	0.0587	0.0673	0.0741	0.0802	0.0665	0.0736	0.0702	0.0949	0.0799	0.0719	0.0589	0.069	0.077
PC O-38:10	PC-O	Positive	M+H	784.528	4.15	PC O-18:0/18:1-d9	0.0798357	0.08665	0.0808	0.078	0.0661	0.0762	0.0941	0.0754	0.0628	0.064	0.0799	0.114	0.062	0.0706	0.069	0.0748	0.0838	0.074	0.0745	0.0638	0.0759	0.0931	0.077	0.0553	0.0734	0.0709	0.0793	0.0715	0.0744	0.0831	0.0938	0.106	0.078	0.0675	0.0616	0.0638
PC O-38:2_1	PC-O	Positive	M+H	800.653	5.74	PC O-18:0/18:1-d9	0.124467	0.04345	0.0697	0.0653	0.05175	0.0679	0.0596	0.0514	0.0522	0.0494	0.0703	0.0606	0.0623	0.0564	0.0504	0.0663	0.055	0.0599	0.0518	0.0556	0.0679	0.052	0.0523	0.0516	0.0526	0.0611	0.062	0.0525	0.0546	0.0603	0.0793	0.0668	0.0619	0.0597	0.0508	0.0634
PC O-40:10	PC-O	Positive	M+H	812.559	4.25	PC O-18:0/18:1-d9	0.104461	0.06635	0.07125	0.07505	0.0578	0.051	0.0688	0.0593	0.068	0.0506	0.0539	0.0731	0.0553	0.0637	0.0612	0.0568	0.0657	0.0606	0.0642	0.0626	0.0579	0.0569	0.068	0.0547	0.067	0.0449	0.0655	0.0575	0.0644	0.0649	0.0638	0.0656	0.07	0.0544	0.0628	0.0178
PC O-40:4	PC-O	Positive	M+H	824.653	5.36	PC O-18:0/18:1-d9	0.0247679	0.13	0.1325	0.126	0.1075	0.126	0.121	0.107	0.104	0.0989	0.115	0.136	0.109	0.125	0.102	0.126	0.116	0.114	0.0945	0.119	0.112	0.117	0.105	0.0948	0.108	0.106	0.147	0.0961	0.109	0.13	0.132	0.132	0.115	0.106	0.122	0.12
PC O-40:8	PC-O	Positive	M+H	816.59	4.45	PC O-18:0/18:1-d9	0.0108977	0.01675	0.0115	0.0169	0.012155	0.008075	0.0161	0.00622	0.0119	0.0154	0.0086	0.0111	0.0109	0.0148	0.0119	0.01	0.0134	0.0108	0.0119	0.0168	0.00174	0.0139	0.0156	0.0163	0.0172	0.00712	0.015	0.0113	0.0183	0.0221	0.00536	0.0095	0.0105	0.0102	0.0212	0.00348
PE 21:4	PE	Negative	M-H	528.273	2.53	PE 15:0/18:1-d7	0.0049633	0.1475	0.57	0.131	0.126	0.178	0.215	0.14	0.103	0.249	0.107	1.51	0.428	0.622	0.414	0.359	0.241	0.789	0.381	0.384	0.229	0.155	0.23	0.197	0.227	0.181	0.222	0.456	0.344	0.84	0.652	0.487	3.27	0.452	0.224	0.255
PE 23:4	PE	Negative	M-H	556.304	2.69	PE 15:0/18:1-d7	0.0548034	0.0274	0.11945	0.023	0.01695	0.0419	0.0423	0.0384	0.0255	0.0516	0.0312	0.348	0.12	0.162	0.0691	0.0859	0.051	0.185	0.0791	0.077	0.0686	0.0416	0.0542	0.0153	0.0436	0.0392	0.0468	0.0996	0.0724	0.163	0.19	0.113	0.853	0.0777	0.0317	0.0541
PE 32:0	PE	Negative	M-H	690.508	4.82	PE 15:0/18:1-d7	0.00237181	0.919	1.005	0.8735	0.782	0.8595	0.9	0.805	0.785	0.857	0.897	1.04	0.783	0.873	0.791	0.957	0.958	0.855	0.943	0.845	0.896	0.95	0.875	0.916	0.819	0.848	0.974	0.828	0.909	0.787	0.984	1	0.859	0.844	0.865	0.807
PE 32:1	PE	Negative	M-H	688.492	4.42	PE 15:0/18:1-d7	0.0244758	0.564	0.621	0.6065	0.5	0.566	0.543	0.526	0.581	0.513	0.606	0.632	0.507	0.629	0.47	0.587	0.628	0.522	0.671	0.544	0.555	0.583	0.502	0.608	0.488	0.548	0.606	0.485	0.593	0.495	0.616	0.653	0.48	0.553	0.49	0.473
PE 34:1	PE	Negative	M-H	716.524	4.9	PE 15:0/18:1-d7	0.0172379	5.79	7.135	7.1	6.125	5.27	6.01	5.7	6.45	6.29	5.44	6.86	5.75	6.6	6.04	5.61	6.32	5.71	7.48	6.63	5.41	6.21	5.67	7.34	6.13	5.36	6.04	5.2	7.43	5.97	5.67	6.17	5.62	6.44	6.17	4.95
PE 34:2	PE	Negative	M-H	714.508	4.51	PE 15:0/18:1-d7	0.034674	3.015	4.165	4.18	3.765	2.885	2.94	3.28	4.4	3.79	3.24	3.3	3.28	4.27	3.66	3.31	3.33	3.28	4.57	3.9	2.97	2.97	3.35	4.25	3.75	2.95	3.22	3.14	4.23	3.46	3.26	3.19	3.17	3.74	3.62	2.8
PE 34:3	PE	Negative	M-H	712.492	4.16	PE 15:0/18:1-d7	0.0202153	0.1285	0.17	0.1985	0.174	0.1265	0.112	0.146	0.215	0.163	0.133	0.133	0.122	0.185	0.144	0.154	0.139	0.136	0.218	0.184	0.137	0.13	0.142	0.198	0.161	0.138	0.151	0.13	0.202	0.158	0.12	0.129	0.149	0.167	0.191	0.116
PE 35:2	PE	Negative	M-H	728.524	4.74	PE 15:0/18:1-d7	0.00696316	0.07585	0.0989	0.10595	0.09425	0.07805	0.092	0.0808	0.108	0.0935	0.0597	0.051	0.0844	0.105	0.09	0.074	0.0895	0.0731	0.102	0.0872	0.0596	0.0949	0.0871	0.115	0.0709	0.0706	0.0877	0.078	0.0923	0.0819	0.0933	0.0875	0.077	0.099	0.0755	0.0593
PE 36:1	PE	Negative	M-H	744.555	5.41	PE 15:0/18:1-d7	0.00349431	4.57	6.205	5.845	5.26	4.59	5.1	5.02	5.6	5.33	4.86	4.95	4.51	5.65	5.36	4.78	5.36	4.9	6.04	5.62	4.66	5.48	5.54	5.85	5.21	4.86	5.2	4.89	6.33	5.08	5.43	5.71	5.11	5.59	5.62	4.98
PE 36:2	PE	Negative	M-H	742.539	4.99	PE 15:0/18:1-d7	0.00951177	8.455	12.15	12.95	11.25	8.195	8.87	9.47	12.5	11.9	8.73	8.95	9.55	12.6	10.8	8.67	9.68	9.47	12.8	11.6	7.95	9.15	9.69	13.2	11.1	8.33	9.3	8.98	13.2	10.6	9.05	8.81	9.31	11.5	11.5	7.58
PE 36:3	PE	Negative	M-H	740.524	4.59	PE 15:0/18:1-d7	0.0221708	3.06	4.195	4.945	4.23	2.68	2.91	3.49	4.92	4.22	2.86	3.09	3.4	4.86	4.1	2.9	3.22	3.38	4.9	4.42	2.72	3.05	3.5	4.95	4.12	2.67	2.98	3.28	4.9	4.08	2.92	2.96	3.25	4.23	4.14	2.64
PE 36:4	PE	Negative	M-H	738.508	4.43	PE 15:0/18:1-d7	0.020941	13.45	16.75	14.45	13.25	12.95	13.4	13.6	14.5	12.9	13.8	13.3	12.8	13.4	12.4	13.7	14.6	13.2	14.4	13.9	12.4	13.2	13.1	15	13.4	12.4	14.2	12.5	14.1	12.8	13.3	13.5	11.7	12.6	13	11.7
PE 36:5	PE	Negative	M-H	736.492	4.1	PE 15:0/18:1-d7	0.0567065	0.405	0.5065	0.5985	0.474	0.36	0.393	0.454	0.588	0.497	0.387	0.406	0.389	0.574	0.439	0.407	0.449	0.401	0.57	0.535	0.411	0.414	0.414	0.605	0.438	0.383	0.425	0.393	0.564	0.449	0.393	0.383	0.436	0.537	0.498	0.351
PE 37:4	PE	Negative	M-H	752.524	4.66	PE 15:0/18:1-d7	0.023807	0.7125	0.726	0.6165	0.607	0.6605	0.748	0.652	0.584	0.615	0.693	0.705	0.566	0.609	0.578	0.651	0.783	0.598	0.6	0.625	0.637	0.745	0.628	0.704	0.616	0.625	0.751	0.645	0.616	0.568	0.659	0.725	0.567	0.551	0.602	0.583
PE 38:2	PE	Negative	M-H	770.571	5.52	PE 15:0/18:1-d7	0.00705428	0.5435	0.677	0.7075	0.617	0.5685	0.557	0.542	0.7	0.569	0.604	0.566	0.48	0.701	0.553	0.611	0.608	0.552	0.71	0.638	0.535	0.601	0.6	0.7	0.568	0.578	0.588	0.513	0.729	0.526	0.618	0.577	0.527	0.642	0.6	0.543
PE 38:4	PE	Negative	M-H	766.539	4.92	PE 15:0/18:1-d7	0.000835979	47.95	63.1	50.6	48.6	49.55	51	49.7	46.7	49.9	55.6	50.5	47.8	43.8	47.3	53.4	52.3	47.3	48.3	52.6	51.1	50.9	49.2	51.9	49.6	52.2	52.1	45.8	52.6	47.8	55.9	48.4	49.6	43.3	49.8	45.9
PE 38:6	PE	Negative	M-H	762.508	4.27	PE 15:0/18:1-d7	0.038079	8.01	9.39	8.155	7.855	7.06	7.45	7.87	8.51	7.97	7.42	7.64	6.67	7.25	7.18	7.72	8.63	7.07	7.96	8.12	7.02	8.34	7.89	8.29	7.33	7.1	8.27	7.06	7.91	7.41	7.6	7.11	6.9	6.96	7.98	6.55
PE 40:5	PE	Negative	M-H	792.555	4.89	PE 15:0/18:1-d7	0.0001892	5.105	6.66	5.465	4.9	5.305	5.09	5.25	5.17	5.06	5.56	5.05	5	4.8	4.8	5.62	5.67	5.05	5.24	4.98	5.26	5.71	5.59	5.83	4.83	5.38	5.6	4.95	5.53	4.78	5.74	5.03	5.26	5.01	5.06	5.31
PE 40:6	PE	Negative	M-H	790.539	4.74	PE 15:0/18:1-d7	0.0242772	10.55	11.8	9.22	9.025	9.81	10.7	10	8.98	9.33	10.8	9.74	9.35	8.84	8.96	10.8	11.7	9.66	8.87	9.87	9.64	12.1	10.6	10.4	9.04	10.7	12	10.2	9.46	9.28	12.1	11.4	9.88	8.82	9.83	10.6
PE 40:7	PE	Negative	M-H	788.524	4.36	PE 15:0/18:1-d7	0.0277765	4.91	5.635	4.915	4.42	4.155	4.8	4.73	4.83	4.34	4.56	4.28	4.01	4.25	3.9	4.63	5.06	3.87	4.58	4.07	3.92	4.87	4.33	5	4.23	3.82	5.08	4.11	4.45	4.28	4.29	4.31	3.99	4.03	4.54	3.78
PE 40:8	PE	Negative	M-H	786.508	4.07	PE 15:0/18:1-d7	0.0419867	0.663	0.817	0.6565	0.593	0.5995	0.678	0.665	0.64	0.59	0.639	0.628	0.594	0.55	0.538	0.657	0.716	0.614	0.614	0.603	0.615	0.714	0.644	0.675	0.572	0.707	0.823	0.634	0.666	0.598	0.696	0.73	0.684	0.624	0.648	0.635
PE 42:10	PE	Negative	M-H	810.508	3.95	PE 15:0/18:1-d7	0.0523264	0.112	0.134	0.09895	0.08495	0.1085	0.111	0.111	0.108	0.0954	0.101	0.0954	0.103	0.0889	0.0825	0.0865	0.14	0.091	0.11	0.0869	0.0985	0.145	0.122	0.138	0.109	0.123	0.161	0.116	0.126	0.0967	0.136	0.142	0.127	0.112	0.121	0.102
PE 42:7	PE	Negative	M-H	816.555	4.81	PE 15:0/18:1-d7	0.00343804	0.2055	0.2255	0.2	0.1715	0.1765	0.205	0.18	0.175	0.188	0.182	0.173	0.167	0.176	0.152	0.199	0.205	0.175	0.181	0.154	0.168	0.241	0.197	0.231	0.179	0.185	0.223	0.174	0.167	0.163	0.209	0.182	0.191	0.165	0.171	0.189
PE 42:8	PE	Negative	M-H	814.539	4.23	PE 15:0/18:1-d7	0.0539367	0.2665	0.305	0.2335	0.2195	0.2845	0.271	0.272	0.227	0.213	0.282	0.22	0.227	0.216	0.205	0.289	0.297	0.213	0.233	0.212	0.236	0.277	0.239	0.269	0.218	0.267	0.287	0.224	0.257	0.237	0.255	0.244	0.217	0.207	0.23	0.259
PE 44:10	PE	Negative	M-H	838.539	4.12	PE 15:0/18:1-d7	0.136463	0.03395	0.043	0.02785	0.0325	0.03615	0.0414	0.0291	0.0262	0.0173	0.0319	0.003065	0.0263	0.0148	0.0271	0	0.039	0.0252	0.0125	0.0248	0.0305	0.0273	0.0289	0.0256	0.0297	0.0321	0.0377	0.00613	0.003065	0.028	0.0261	0.0281	0.0274	0.0213	0.0243	0.003065
PE O-16:1_16:0	PE-O	Negative	M-H	674.513	5.15	PE 15:0/18:1-d7	0.0100674	0.439	0.525	0.489	0.489	0.427	0.45	0.413	0.486	0.467	0.454	0.455	0.363	0.445	0.478	0.432	0.491	0.401	0.513	0.505	0.406	0.495	0.425	0.502	0.453	0.403	0.449	0.38	0.486	0.476	0.448	0.424	0.359	0.415	0.52	0.34
PE O-16:1_18:1	PE-O	Negative	M-H	700.529	5.26	PE 15:0/18:1-d7	0.00934237	4.5	5.435	4.74	4.585	4.195	4.52	4.27	4.71	4.41	4.4	4.55	3.76	4.46	4.59	4.43	4.92	3.79	4.73	4.6	4.09	4.68	4.41	5.02	4.36	4.29	4.76	3.97	4.96	4.27	4.39	4.26	3.86	4.25	4.77	3.68
PE O-16:1_18:2	PE-O	Negative	M-H	698.513	4.8	PE 15:0/18:1-d7	0.000189789	0.945	1.225	1.3	1.13	0.9905	0.949	0.943	1.19	1.13	1.07	0.895	0.861	1.08	1.02	1.1	1.03	0.886	1.25	1.11	0.981	1.01	0.994	1.29	1.13	0.983	1	0.857	1.16	1.04	1.01	0.914	0.973	1.09	1.13	0.892
PE O-16:1_20:4	PE-O	Negative	M-H	722.513	4.71	PE 15:0/18:1-d7	0.0211636	28	35.65	29.5	30.7	27.6	28.7	30.8	29.3	30.9	29.8	24.6	27.9	28.3	29.8	29.3	31.3	28.1	27.6	32.9	26.4	30.7	30.4	32.6	30.1	27.6	28.7	28.7	27.9	29.5	30.9	26.2	26.3	26.4	31.7	23.7
PE O-16:1_22:6	PE-O	Negative	M-H	746.513	4.54	PE 15:0/18:1-d7	0.024594	16.8	19.8	15.15	15.85	15.35	16.4	15.6	14.9	15.7	17.3	15.2	15	13.2	14.2	16.5	18.8	14.7	13.9	15.1	15.1	17.1	16.2	15.2	15.2	16	18.1	14.3	14.6	14.2	16.9	15.4	14.4	13.3	16.4	14.8
PE O-18:1_16:0	PE-O	Negative	M-H	702.544	5.67	PE 15:0/18:1-d7	0.0281274	0.2255	0.279	0.2055	0.242	0.213	0.254	0.207	0.175	0.251	0.276	0.213	0.203	0.186	0.185	0.24	0.25	0.188	0.191	0.196	0.218	0.244	0.218	0.234	0.222	0.252	0.229	0.195	0.185	0.228	0.236	0.223	0.197	0.175	0.211	0.211
PE O-18:1_18:1	PE-O	Negative	M-H	728.56	5.77	PE 15:0/18:1-d7	0.0418143	1.0665	1.305	1.01	1.06	1.07	1.1	1.04	1.01	1.06	1.14	0.939	0.892	0.96	1.12	1.14	1.09	0.956	0.994	1.06	1.06	1.18	1.04	1.05	1.02	1.09	1.05	0.915	0.985	1.03	1.06	0.97	0.915	0.885	1.05	0.908
PE O-18:1_18:2	PE-O	Negative	M-H	726.544	5.32	PE 15:0/18:1-d7	0.00220116	1.61	1.985	2.015	1.78	1.51	1.6	1.58	1.89	1.77	1.7	1.46	1.42	1.86	1.81	1.59	1.67	1.44	1.89	1.77	1.53	1.65	1.66	1.96	1.8	1.57	1.64	1.38	2.01	1.67	1.6	1.38	1.48	1.66	1.82	1.37
PE O-18:1_20:4	PE-O	Negative	M-H	750.544	5.24	PE 15:0/18:1-d7	0.0326392	22.6	29.5	20.15	23.6	23	24.1	24.7	20.5	21.5	23.5	20	23.1	19.7	20.6	23.4	23.8	19.9	18.8	20.5	21.6	26.4	24	21.8	20.7	23.2	25.6	20.1	20.4	19.7	23.2	19.5	20.4	20.7	22.5	20.7
PE O-18:1_22:6	PE-O	Negative	M-H	774.544	5.06	PE 15:0/18:1-d7	0.0143019	5.46	6.83	4.745	5.155	5.57	5.59	5.39	4.52	5.24	5.88	4.74	5.09	4.19	4.64	5.86	6.35	4.77	4.31	4.75	5.11	6.03	5.61	4.95	4.94	5.69	5.81	4.8	4.56	4.59	5.64	5.09	4.76	4.08	5.29	4.86
PE O-18:2_14:0	PE-O	Negative	M-H	672.497	4.74	PE 15:0/18:1-d7	0.000862095	0.158	0.2075	0.2315	0.18	0.1625	0.174	0.171	0.216	0.164	0.177	0.156	0.145	0.189	0.182	0.176	0.191	0.14	0.199	0.198	0.163	0.176	0.158	0.235	0.167	0.147	0.157	0.161	0.196	0.182	0.185	0.164	0.142	0.199	0.179	0.135
PE O-18:2_18:2	PE-O	Negative	M-H	724.529	4.89	PE 15:0/18:1-d7	0.00392445	1.535	2.1	1.955	1.795	1.71	1.5	1.62	1.81	1.92	1.73	1.62	1.56	1.63	1.7	1.79	1.76	1.57	1.87	1.85	1.69	1.6	1.65	2.01	1.76	1.67	1.59	1.56	1.9	1.76	1.75	1.49	1.61	1.67	1.85	1.55
PE O-18:2_20:4	PE-O	Negative	M-H	748.529	4.81	PE 15:0/18:1-d7	0.002947	15.3	20.2	19.05	17.65	14.25	15.7	16.2	17.9	17.7	15.5	14.3	14.6	16	16.5	15.1	16.7	14.4	17.6	17.5	13.9	16.4	16.5	20	17.7	14.2	16.4	14.6	17.9	16.6	15.1	13.8	15	16.4	18.6	12.8
PE O-35:2	PE-O	Negative	M-H	714.544	5.52	PE 15:0/18:1-d7	0.0856448	0.0507	0.0741	0.0578	0.0596	0.0583	0.0513	0.0637	0.0511	0.0597	0.0685	0.0511	0.0311	0.0347	0.058	0.0504	0.0612	0.0492	0.0588	0.0502	0.05	0.0612	0.061	0.0621	0.053	0.0437	0.0576	0.0454	0.0344	0.0351	0.0595	0.0392	0.0298	0.0334	0.0596	0.0175
PE O-36:6	PE-O	Negative	M-H	720.497	4.35	PE 15:0/18:1-d7	0.00392846	0.2305	0.35	0.406	0.343	0.215	0.212	0.272	0.367	0.342	0.221	0.205	0.233	0.346	0.317	0.22	0.235	0.234	0.354	0.34	0.2	0.229	0.248	0.397	0.32	0.203	0.235	0.242	0.378	0.33	0.199	0.185	0.235	0.343	0.382	0.176
PE O-38:2	PE-O	Negative	M-H	756.591	6.3	PE 15:0/18:1-d7	0.19815	0.1665	0.1715	0.14	0.146	0.15	0.187	0.126	0.13	0.143	0.177	0.149	0.126	0.131	0.138	0.153	0.139	0.121	0.113	0.144	0.128	0.16	0.13	0.124	0.124	0.142	0.152	0.114	0.113	0.136	0.147	0.122	0.123	0.112	0.109	0.1
PE O-38:3	PE-O	Negative	M-H	754.576	5.9	PE 15:0/18:1-d7	0.108917	0.2215	0.2775	0.2235	0.2345	0.242	0.256	0.208	0.233	0.204	0.233	0.193	0.179	0.209	0.212	0.228	0.24	0.19	0.246	0.217	0.22	0.246	0.204	0.229	0.197	0.239	0.225	0.171	0.226	0.179	0.21	0.185	0.174	0.204	0.214	0.184
PE O-38:4	PE-O	Negative	M-H	752.56	5.45	PE 15:0/18:1-d7	0.0141484	2.05	2.575	1.99	1.895	2.375	2.09	1.97	1.91	1.79	2.64	1.97	1.91	1.79	1.9	2.46	2.12	1.92	1.88	1.77	2.26	2.23	2.06	2.01	1.78	2.33	2.12	1.9	2.01	1.79	2.39	1.95	1.81	1.73	1.85	2.03
PE O-40:3	PE-O	Negative	M-H	782.607	6.34	PE 15:0/18:1-d7	0.360494	0.0376	0.05835	0.02755	0.04115	0.03785	0.0402	0.044	0.023	0.0204	0.0256	0.0417	0.0309	0.0298	0.0251	0.033	0.0315	0.0268	0.0186	0.0123	0.0309	0.0287	0.0273	0.0359	0.00615	0.0288	0.0309	0.0241	0.0318	0.0149	0.0226	0.0138	0.0159	0.0151	0.0276	0.00615
PE O-40:5	PE-O	Negative	M-H	778.576	5.79	PE 15:0/18:1-d7	0.0411034	4.215	5.225	4	4.045	4.69	4.56	4.36	4.08	2.93	5.26	3.95	3.72	3.52	3.81	5.05	4.53	3.7	3.71	3.82	4.61	4.7	4.31	4.25	3.75	4.87	4.63	3.8	2.88	3.65	4.55	3.88	3.83	3.46	4.31	4.31
PE O-40:6	PE-O	Negative	M-H	776.56	5.24	PE 15:0/18:1-d7	0.00497193	4.055	4.725	3.685	3.575	4.09	4.19	3.71	3.63	3.49	4.59	3.83	3.32	3.32	3.42	4.38	4.56	3.4	3.52	3.42	3.95	4.54	3.87	3.96	3.32	4.18	4.36	3.35	3.6	3.31	4.37	3.76	3.4	3.16	3.63	3.69
PE O-40:8	PE-O	Negative	M-H	772.529	4.58	PE 15:0/18:1-d7	0.0358264	5.105	5.505	4.57	4.43	4.41	4.99	4.51	4.37	4.37	4.71	4.53	4.01	3.92	4.12	4.55	5.75	3.98	4.06	4.38	4.31	5.38	4.58	4.65	4.4	4.41	5.13	4.06	4.44	4.29	4.54	4.6	4	3.84	4.7	4.06
PE O-42:6	PE-O	Negative	M-H	804.591	5.76	PE 15:0/18:1-d7	0.532816	0.1494	0.10825	0.15225	0.1587	0.08	0.248	0.0169	0.0662	0.143	0.28	0.0869	0.134	0.0926	0.144	0.0757	0.291	0.00845	0.0238	0.144	0.0169	0.00845	0.221	0.21	0.0528	0.093	0.132	0.058	0.128	0.157	0.185	0.00845	0.166	0.00845	0.137	0.188
PG 32:0	PG	Negative	M-H	721.503	4.07	PG 15:0/18:1-d7	0.0459493	0.175	0.1575	0.1315	0.129	0.173	0.167	0.127	0.135	0.132	0.167	0.196	0.143	0.144	0.127	0.162	0.185	0.154	0.143	0.154	0.161	0.182	0.145	0.133	0.13	0.156	0.163	0.12	0.124	0.129	0.168	0.167	0.128	0.108	0.12	0.146
PG 32:1	PG	Negative	M-H	719.487	3.87	PG 15:0/18:1-d7	0.0373133	0.0223	0.0213	0.02	0.01585	0.0216	0.024	0.0163	0.017	0.0173	0.0233	0.0206	0.00961	0.0185	0.014	0.0153	0.0255	0.0175	0.0225	0.0182	0.0242	0.0187	0.0125	0.0169	0.0187	0.0159	0.0221	0.0116	0.0184	0.0154	0.0219	0.0243	0.0132	0.0172	0.0135	0.004805
PG 34:1	PG	Negative	M-H	747.518	4.52	PG 15:0/18:1-d7	0.0394247	7.35	8.38	6.395	7.03	6.995	7.48	6.76	6.72	6.65	7.74	5.81	6.62	5.52	6.35	6.49	8.48	6.56	5.43	6.14	6.54	8.24	7.55	6.96	7.34	6.67	7.43	5.87	6.06	5.86	6.68	6.11	6.36	5.38	7.12	6.91
PG 34:2	PG	Negative	M-H	745.503	3.95	PG 15:0/18:1-d7	0.0700658	0.10345	0.125	0.126	0.105	0.1185	0.136	0.135	0.115	0.0752	0.111	0.11	0.0866	0.123	0.0999	0.109	0.131	0.0995	0.13	0.0881	0.109	0.127	0.103	0.122	0.117	0.11	0.0993	0.0901	0.103	0.088	0.102	0.0988	0.0967	0.0716	0.0844	0.074
PG 36:1	PG	Negative	M-H	775.549	5.02	PG 15:0/18:1-d7	0.0678842	2.235	2.69	1.81	2.115	2.345	2.38	2.15	1.82	2.07	2.55	2.51	2.11	1.57	1.91	2.09	2.71	1.94	1.54	1.78	2.11	2.71	2.42	1.97	2.19	2.23	2.18	1.84	1.79	1.75	2.05	2.68	2.01	1.49	2.19	2.1
PG 36:2	PG	Negative	M-H	773.534	4.6	PG 15:0/18:1-d7	0.147996	3.055	2.805	2.49	2.57	2.88	3.05	2.79	2.36	2.47	2.82	3.27	2.66	2.83	2.38	3.15	3.82	2.56	2.46	2.66	3.26	3.27	2.51	2.56	2.89	2.72	2.93	2.6	2.48	2.41	2.79	3.29	2.6	2.48	2.87	2.79
PG 36:3	PG	Negative	M-H	771.518	4.23	PG 15:0/18:1-d7	0.00604029	3.37	3.25	2.65	2.52	2.855	3.35	2.73	2.64	2.61	2.86	3.37	2.75	2.78	2.67	2.79	3.86	2.92	2.73	2.72	2.93	3.59	2.79	3.16	2.94	2.71	3.2	2.57	2.74	2.62	2.99	2.96	2.74	2.48	2.78	2.57
PG 38:4	PG	Negative	M-H	797.534	4.23	PG 15:0/18:1-d7	0.0820722	0.0697	0.0788	0.0521	0.05735	0.07025	0.0785	0.0725	0.0562	0.0649	0.0699	0.0653	0.0528	0.0424	0.0525	0.0654	0.0871	0.0634	0.0501	0.0583	0.0818	0.0852	0.0689	0.0629	0.0573	0.0716	0.0616	0.0544	0.052	0.0499	0.0716	0.0548	0.0512	0.0338	0.0567	0.0501
PG 38:5	PG	Negative	M-H	795.518	3.76	PG 15:0/18:1-d7	0.0342144	2.915	2.825	2.465	2.29	2.44	2.87	2.33	2.48	2.36	2.42	2.44	2.28	2.33	2.34	2.37	3.34	2.38	2.26	2.34	2.42	3	2.43	2.8	2.47	2.29	2.74	2.23	2.34	2.21	2.45	2.3	2.29	2	2.35	2.17
PG 38:6	PG	Negative	M-H	793.503	3.5	PG 15:0/18:1-d7	0.00196042	1.58	1.835	1.645	1.46	1.35	1.68	1.57	1.75	1.46	1.37	1.48	1.58	1.49	1.46	1.37	1.91	1.5	1.56	1.49	1.46	1.82	1.56	1.86	1.61	1.35	1.68	1.38	1.47	1.41	1.36	1.33	1.51	1.42	1.51	1.28
PG 40:6	PG	Negative	M-H	821.534	3.95	PG 15:0/18:1-d7	0.110174	0.8485	0.9695	0.849	0.7445	0.873	1.02	0.861	0.872	0.692	0.868	0.767	0.77	0.784	0.733	0.798	1.11	0.744	0.798	0.692	0.828	1.1	0.843	0.934	0.8	0.779	0.969	0.737	0.821	0.689	0.799	0.737	0.716	0.702	0.733	0.636
PG 40:7	PG	Negative	M-H	819.518	3.65	PG 15:0/18:1-d7	0.0310508	1.735	1.72	1.55	1.345	1.545	1.8	1.41	1.73	1.33	1.56	1.46	1.36	1.42	1.31	1.47	2.06	1.37	1.43	1.28	1.54	1.91	1.45	1.67	1.4	1.51	1.71	1.29	1.42	1.29	1.51	1.25	1.36	1.34	1.29	1.4
PG 40:8	PG	Negative	M-H	817.503	3.46	PG 15:0/18:1-d7	0.0179889	1.205	1.36	1.29	1.12	0.987	1.25	1.14	1.25	1.13	1.03	1.02	1.12	1.09	1.19	0.963	1.39	1.08	1.23	1.28	0.952	1.35	1.15	1.45	1.27	0.933	1.24	1.03	1.17	1.09	0.915	0.912	1.06	1.05	1.18	0.842
PI 32:0	PI	Negative	M-H	809.519	4.04	PI 15:0/18:1-d7	0.0275375	0.937	0.962	0.9025	0.8745	0.8775	0.97	0.776	0.911	0.912	0.86	0.868	0.816	0.895	0.864	1.07	1.04	0.822	0.785	0.979	0.907	0.978	0.883	0.807	0.859	0.799	0.776	0.681	0.774	0.789	0.868	0.696	0.682	0.667	0.785	1.05
PI 32:1	PI	Negative	M-H	807.503	3.78	PI 15:0/18:1-d7	0.109677	0.9235	0.8955	0.7665	0.7675	0.8505	0.896	0.759	0.754	0.774	0.91	0.956	0.739	0.703	0.766	0.963	0.989	0.787	0.67	0.765	0.881	0.851	0.728	0.78	0.682	0.806	0.714	0.588	0.546	0.615	0.766	0.581	0.556	0.423	0.559	0.875
PI 34:0	PI	Negative	M-H	837.55	4.43	PI 15:0/18:1-d7	0.0216042	2.325	2.55	1.92	2.095	2.485	2.05	2.28	2.11	2.06	2.67	2.11	2.11	2	2.18	2.55	2.22	2.38	1.77	2.19	2.39	2.17	2.11	1.79	2.07	2.05	1.94	1.93	1.59	1.75	2.22	1.98	1.73	1.36	1.6	2.95
PI 34:1	PI	Negative	M-H	835.534	4.12	PI 15:0/18:1-d7	0.00591489	8.815	8.515	6.535	7.54	8.3	8.01	7.83	6.91	7.43	8.31	8.03	7.16	6.58	7.25	8.66	8.95	7.81	6.03	7.69	8.44	8.09	7.35	6.57	7.3	7.5	7.2	6.09	5.29	6.26	7.69	6.36	5.71	4.45	6.24	10.3
PI 34:2	PI	Negative	M-H	833.519	3.83	PI 15:0/18:1-d7	0.00787466	1.29	1.42	1.45	1.435	1.21	1.34	1.19	1.35	1.52	1.21	1.25	1.21	1.54	1.45	1.34	1.31	1.29	1.39	1.43	1.18	1.16	1.2	1.46	1.42	1.07	1.08	1.03	1.23	1.26	1.1	0.903	0.868	1.08	1.2	1.38
PI 36:1	PI	Negative	M-H	863.566	4.54	PI 15:0/18:1-d7	0.0978034	1.0085	1.31	1.755	1.725	0.693	0.988	1.12	1.78	1.83	0.835	1.03	1.27	1.96	1.8	0.714	1.02	1.31	1.8	1.72	0.672	0.989	1.23	1.73	1.68	0.715	0.842	1.09	1.92	1.55	0.762	0.978	0.95	1.6	1.62	1.03
PI 36:2	PI	Negative	M-H	861.55	4.21	PI 15:0/18:1-d7	0.0316829	3.275	3.905	4.525	4.745	2.6	3.13	3.45	4.78	4.6	2.81	3.36	3.59	5.32	4.53	2.78	3.14	3.8	4.77	5.12	2.7	3.18	3.81	4.61	4.77	2.53	2.72	3.19	4.6	4.26	2.87	2.83	2.92	3.97	4.25	3.78
PI 36:3	PI	Negative	M-H	859.534	3.93	PI 15:0/18:1-d7	0.0298774	1.37	1.625	1.795	1.595	1.28	1.32	1.34	1.76	1.64	1.27	1.33	1.38	1.9	1.66	1.36	1.46	1.43	1.75	1.68	1.28	1.3	1.36	1.91	1.72	1.19	1.14	1.14	1.54	1.54	1.22	1.04	1.05	1.32	1.49	1.26
PI 36:4	PI	Negative	M-H	857.519	3.79	PI 15:0/18:1-d7	0.0113931	10.7	11.25	11.15	10.6	9.535	10.4	9.66	11.2	10.8	9.93	10.2	9.82	11.8	11.1	10.4	11.4	10.1	10.8	10.9	10	10.5	10.1	11.7	11.2	9.43	9.05	8.47	10	9.6	9.81	7.91	7.49	9.2	9.87	12.1
PI 36:5	PI	Negative	M-H	855.503	3.55	PI 15:0/18:1-d7	0.062192	0.3435	0.406	0.3785	0.3255	0.3525	0.342	0.359	0.415	0.344	0.375	0.296	0.333	0.358	0.3	0.382	0.363	0.316	0.259	0.31	0.365	0.34	0.353	0.351	0.305	0.35	0.27	0.258	0.227	0.251	0.307	0.167	0.228	0.249	0.257	0.357
PI 37:4	PI	Negative	M-H	871.534	3.97	PI 15:0/18:1-d7	0.0338843	0.581	0.575	0.531	0.52	0.4845	0.591	0.468	0.542	0.559	0.507	0.545	0.469	0.54	0.483	0.49	0.576	0.499	0.493	0.48	0.484	0.581	0.514	0.523	0.468	0.44	0.49	0.409	0.493	0.462	0.478	0.477	0.36	0.435	0.452	0.544
PI 38:3	PI	Negative	M-H	887.566	4.31	PI 15:0/18:1-d7	0.0414496	1.35	1.5	1.24	1.27	1.605	1.33	1.23	1.37	1.2	1.74	1.29	1.2	1.42	1.2	1.81	1.27	1.25	1.26	1.25	1.6	1.29	1.36	1.28	1.16	1.38	1.22	1.05	1.24	1.29	1.61	1.2	1.03	1.12	1.21	2.42
PI 38:4	PI	Negative	M-H	885.55	4.17	PI 15:0/18:1-d7	0.0592	71.85	80.4	76.05	80.75	67.9	67.5	69.3	78.1	76.8	68.4	68.2	70.6	80.8	78.7	71.2	70.2	75.5	74.9	85.9	67.2	67.7	77.5	78.2	81.6	64.9	62.2	63.1	73.6	72.6	70.9	58.8	58.4	65.9	74.5	94.7
PI 38:5	PI	Negative	M-H	883.534	3.87	PI 15:0/18:1-d7	0.0199303	8.77	8.815	9.25	8.475	7.54	8.47	7.53	9.23	8.47	7.9	7.93	7.53	9.42	8.19	8.26	9.23	7.64	8.51	8.83	7.53	8.7	7.78	9.68	8.71	7.23	7.83	6.46	7.97	7.83	7.49	6.16	5.52	7.12	7.59	8.86
PI 38:6	PI	Negative	M-H	881.519	3.68	PI 15:0/18:1-d7	0.0357547	0.874	0.837	0.798	0.7905	0.84	0.889	0.675	0.83	0.778	0.842	0.756	0.646	0.809	0.714	0.844	0.839	0.693	0.718	0.729	0.793	0.845	0.677	0.76	0.714	0.821	0.689	0.532	0.642	0.579	0.772	0.542	0.5	0.559	0.578	0.914
PI 40:5	PI	Negative	M-H	911.566	4.14	PI 15:0/18:1-d7	0.0730686	1.27	1.29	1.23	1.185	1.105	1.16	0.894	1.06	1.14	1.23	0.947	1.09	1.1	0.855	1.24	1.24	1.14	1.19	1.22	1.22	1.09	1.18	1.05	1.2	1.14	1.07	0.977	0.987	0.996	1.17	0.921	0.93	1.08	0.842	1.55
PI 40:6	PI	Negative	M-H	909.55	4.02	PI 15:0/18:1-d7	0.0134095	1.465	1.53	1.44	1.37	1.36	1.5	1.26	1.42	1.44	1.44	1.37	1.22	1.41	1.41	1.47	1.52	1.3	1.3	1.41	1.36	1.41	1.4	1.38	1.37	1.36	1.29	1.13	1.3	1.26	1.29	1.18	0.984	1.13	1.26	1.76
PI O-18:1_20:4	PI	Negative	M-H	869.555	4.12	PI 15:0/18:1-d7	0.00578675	2.345	2.68	2.215	2.27	2.38	2.3	2.31	2.27	2.32	2.48	2.2	2.24	2.22	2.12	2.53	2.46	2.33	2.09	2.36	2.47	2.4	2.49	2.28	2.16	2.29	2.14	2.08	2.1	2	2.43	1.91	2.02	1.99	2.11	3.27
PS 34:1	PS	Negative	M-H	760.513	4.17	PS 15:0/18:1-d7	0.401446	6.475	9.095	5.485	5.105	8.98	7.9	5.67	5.37	5.08	6.56	6.84	5.32	10.4	5.54	5.79	6.99	5.78	4.94	4.97	5.88	6.79	5.38	4.67	4.94	5.28	6.27	5.24	4.52	4.99	5.55	6	4.68	3.78	4.31	6.1
PS 36:1	PS	Negative	M-H	788.545	4.59	PS 15:0/18:1-d7	0.407457	23.55	38.85	22.35	23.05	37.4	29.1	24.4	20.6	24.4	26.8	25	22.4	43.5	27.3	22.3	26.2	25.1	21.1	23	22.7	26.7	23.6	20.8	21.4	21.9	22.5	20.8	17.5	19.9	23.5	20.4	21.1	14.5	19.3	23
PS 36:2	PS	Negative	M-H	786.529	4.27	PS 15:0/18:1-d7	0.359237	15.75	25.8	16.85	17	24.8	18.8	16.5	16.7	16.8	17.2	15	14.2	32	17.3	14.9	16	15	15.7	15.4	14.3	15.4	14.7	14.7	15.3	14.3	14	13.5	12.3	14.3	14.1	12.4	12.5	10.2	12.6	15.2
PS 36:4	PS	Negative	M-H	782.498	3.84	PS 15:0/18:1-d7	0.336808	4.115	5.875	3.525	3.595	5.275	4.43	3.68	3.27	3.47	3.34	3.48	3.27	5.88	3.31	3.25	4.28	3.71	2.98	3.11	3.18	4.09	3.33	3.16	3.1	3.11	4.04	2.92	2.78	3.19	2.85	2.87	2.89	2.24	2.8	2.69
PS 38:1	PS	Negative	M-H	816.576	5.02	PS 15:0/18:1-d7	1.1188	0.9435	1.4935	0.7165	0.6935	1.22	0.714	0.593	0.434	0.522	0.729	0.561	0.509	1.26	0.71	0.486	0.709	0.456	0.535	0.528	0.568	0.698	0.621	0.666	0.572	0.653	0.488	0.552	0.485	0.556	0.586	0.554	0.51	0.385	0.51	0.464
PS 38:2	PS	Negative	M-H	814.56	4.71	PS 15:0/18:1-d7	0.552841	1.145	2.01	1.22	1.085	1.945	1.3	1.08	1.06	1.06	1.39	1.13	1.01	1.85	0.913	1.01	1.03	1.07	1.12	0.932	1.08	1.16	1.01	1.12	0.99	1.08	1.03	0.962	1.02	0.741	1.06	0.881	0.94	0.819	0.923	0.9
PS 38:3	PS	Negative	M-H	812.545	4.39	PS 15:0/18:1-d7	0.361042	6.79	12.275	7.46	7.38	12.36	8.18	7.55	7.04	7.37	8.77	6.52	6.79	13.3	7.17	8.03	7.07	6.61	6.41	6.5	7.71	7.24	7.43	6.53	6.7	7.49	6.7	6.51	5.77	5.95	7.61	5.79	6.33	4.89	5.71	7.31
PS 38:4	PS	Negative	M-H	810.529	4.22	PS 15:0/18:1-d7	0.316344	67.25	97.95	61	66.1	101.15	75.6	68	58	63.7	70.2	60.9	59.3	105	53.2	61.9	66.7	60.6	51.4	54.4	59.8	69.2	65	57.3	60.7	57.5	63.3	58.4	49.7	60.3	48.7	50.3	56.5	42.9	57.5	63.4
PS 40:1	PS	Negative	M-H	844.607	5.64	PS 15:0/18:1-d7	1.15694	0.164	0.2285	0.1805	0.1088	0.272	0.159	0.15	0.146	0.129	0.123	0.0952	0.115	0.169	0.141	0.182	0.176	0.158	0.144	0.124	0.12	0.136	0.13	0.0756	0.0994	0.148	0.121	0.154	0.0547	0.0984	0.211	0.106	0.122	0.02735	0.02735	0.02735
PS 40:2	PS	Negative	M-H	842.592	5.1	PS 15:0/18:1-d7	0.533015	0.3255	0.6495	0.3835	0.3425	0.525	0.506	0.326	0.379	0.354	0.401	0.315	0.285	0.748	0.464	0.239	0.376	0.378	0.268	0.333	0.316	0.462	0.313	0.221	0.292	0.354	0.353	0.289	0.294	0.27	0.301	0.259	0.256	0.189	0.296	0.204
PS 40:4	PS	Negative	M-H	838.56	4.5	PS 15:0/18:1-d7	0.409986	20.25	29.5	18.3	18.95	33.3	24.5	19.9	16.5	18.2	21	18.4	16.7	29.5	18.7	18.4	20.7	16.2	15.1	16.3	19.1	21.4	19.5	16.2	17.2	18.7	16.3	15.3	11.9	14.5	17.6	15.4	15.8	11.6	13.8	19.7
PS 40:5	PS	Negative	M-H	836.545	4.36	PS 15:0/18:1-d7	0.439952	7.04	13.27	6.495	6.565	11.135	8.13	6.84	5.69	6.94	8.25	6.48	7.12	11.1	7.31	7.19	7.01	7.18	5.31	6.19	7.33	7.3	7.42	5.82	5.33	7.01	5.24	6.35	4.62	4.95	6.58	5.05	5.38	3.53	5.26	6.57
PS 40:6	PS	Negative	M-H	834.529	4.06	PS 15:0/18:1-d7	0.399636	36.75	50.75	25.5	30.15	51.6	39.7	32	23.4	27.3	33.9	31.4	28.1	40.2	27.6	31.4	35.5	27.8	19.8	25.8	30.4	34.5	29.2	20.8	26.4	30.1	32.1	25.3	16.5	23.2	28.3	23	22.4	14	22.8	28.7
PS 40:7	PS	Negative	M-H	832.513	3.77	PS 15:0/18:1-d7	0.431996	2.075	3.01	1.79	1.79	2.655	2.31	1.89	1.57	1.67	1.87	1.72	1.71	3.01	1.66	1.8	2.12	1.68	1.34	1.25	1.72	1.92	1.56	1.53	1.57	1.6	1.69	1.41	1.06	1.44	1.28	1.03	1.09	0.878	1.25	1.29
PS 42:1	PS	Negative	M-H	872.639	6.4	PS 15:0/18:1-d7	1.03857	0.2385	0.235	0.311	0.138	0.56	0.169	0.276	0.103	0.182	0.269	0.03795	0.03795	0.567	0.03795	0.305	0.03795	0.128	0.249	0.189	0.0759	0.03795	0.0929	0.228	0.209	0.233	0.116	0.288	0.127	0.139	0.556	0.0818	0.03795	0.131	0.237	0.177
SM 32:1;O2	SM	Positive	M+H	675.544	3.86	SM d18:1/18:1-d9	0.0476057	0.0485	0.06255	0.0645	0.05525	0.05385	0.0511	0.0636	0.0691	0.0492	0.0545	0.0506	0.0548	0.0562	0.0585	0.0588	0.06	0.0568	0.0541	0.0527	0.0529	0.0556	0.0532	0.0703	0.0511	0.0611	0.0589	0.0526	0.06	0.0439	0.0576	0.0524	0.0603	0.0562	0.0482	0.0485
SM 33:1;O2	SM	Positive	M+H	689.559	4.06	SM d18:1/18:1-d9	0.0262174	0.107	0.154	0.1065	0.1145	0.119	0.117	0.131	0.12	0.107	0.118	0.136	0.113	0.118	0.13	0.124	0.143	0.131	0.106	0.114	0.121	0.109	0.124	0.117	0.112	0.116	0.14	0.114	0.0994	0.0941	0.126	0.123	0.132	0.0969	0.101	0.101
SM 33:2;O2	SM	Positive	M+H	703.538	2.94	SM d18:1/18:1-d9	NA	0.02625	0.01725	0.0247	0.0232	0.0319	0.0401	0.033	0.031	0.0296	0.0259	0.0602	0.105	0.172	0.0556	0.0785	0.0456	0.0654	0.0573	0.0784	0.0474	0.0259	0.0606	0.0243	0.0341	0.0251	0.0484	0.0691	0.0687	0.0387	0.133	0.109	0.0693	0.0557	0.0249	0.0412
SM 34:0;O2	SM	Positive	M+H	705.591	4.45	SM d18:1/18:1-d9	0.0119578	0.4025	0.509	0.369	0.3875	0.4395	0.427	0.415	0.42	0.332	0.385	0.496	0.403	0.365	0.368	0.454	0.464	0.463	0.38	0.351	0.445	0.444	0.473	0.435	0.382	0.398	0.515	0.39	0.373	0.329	0.509	0.457	0.42	0.345	0.345	0.422
SM 34:1;O2	SM	Positive	M+H	703.575	4.25	SM d18:1/18:1-d9	0.00432597	6.03	7.21	5.715	6.06	5.75	5.51	5.93	6.2	5.91	6.06	6.76	5.62	6.31	6.39	5.84	7.17	6.74	5.5	6.1	6.11	6.13	6.87	6.16	5.55	6.07	7	6.22	5.51	4.7	6.5	5.8	6	5.51	6.26	5.48
SM 34:1;O3	SM	Positive	M+H	719.57	4.08	SM d18:1/18:1-d9	0.0544781	0.02325	0.03495	0.02045	0.0234	0.02585	0.0243	0.0299	0.0209	0.02	0.0266	0.03	0.0282	0.0239	0.0305	0.025	0.0307	0.0305	0.0196	0.0253	0.0253	0.0237	0.0274	0.0219	0.0248	0.0247	0.0263	0.0258	0.0226	0.0196	0.0291	0.029	0.0264	0.018	0.0222	0.0225
SM 34:2;O2	SM	Positive	M+H	701.559	3.93	SM d18:1/18:1-d9	0.0120835	0.322	0.479	0.3595	0.407	0.3265	0.361	0.456	0.404	0.343	0.315	0.38	0.352	0.356	0.399	0.32	0.408	0.43	0.309	0.407	0.299	0.381	0.436	0.399	0.399	0.334	0.423	0.34	0.364	0.298	0.304	0.34	0.4	0.304	0.352	0.276
SM 35:1;O2	SM	Positive	M+H	717.591	4.48	SM d18:1/18:1-d9	0.0100812	0.05795	0.0735	0.05895	0.06105	0.05855	0.0571	0.0675	0.0589	0.0618	0.0605	0.0674	0.0634	0.0589	0.069	0.0563	0.0725	0.0689	0.0529	0.0567	0.0641	0.0677	0.067	0.0662	0.0565	0.0596	0.0758	0.0683	0.0545	0.0459	0.0738	0.0786	0.0592	0.0608	0.0522	0.06
SM 36:0;O2	SM	Positive	M+H	733.622	4.92	SM d18:1/18:1-d9	0.0117885	0.04735	0.0606	0.044	0.0443	0.053	0.0525	0.0526	0.0498	0.043	0.0469	0.0511	0.0542	0.0493	0.0536	0.0552	0.0533	0.0578	0.0442	0.0466	0.052	0.0539	0.055	0.0476	0.0486	0.0487	0.0591	0.0454	0.0463	0.0415	0.0613	0.057	0.0526	0.0395	0.0485	0.0414
SM 36:1;O2	SM	Positive	M+H	731.606	4.73	SM d18:1/18:1-d9	0.0266484	1.18	1.47	1.14	1.2	1.26	1.15	1.2	1.12	1.18	1.16	1.05	1.25	1.24	1.32	1.29	1.38	1.3	1.02	1.37	1.09	1.35	1.24	1.18	1.15	1.22	1.3	1.17	1.02	0.952	1.45	1.36	1.46	1.06	1.18	1.16
SM 36:2;O2	SM	Positive	M+H	729.591	4.36	SM d18:1/18:1-d9	0.0710474	0.07475	0.10275	0.0694	0.0801	0.07295	0.0801	0.079	0.0816	0.0772	0.0784	0.0845	0.0774	0.0846	0.0891	0.0684	0.0868	0.0913	0.0788	0.0853	0.0737	0.0889	0.093	0.0681	0.0779	0.0654	0.0761	0.073	0.0728	0.0719	0.0767	0.0718	0.0891	0.0615	0.0825	0.0764
SM 37:1;O2	SM	Positive	M+H	745.622	5.03	SM d18:1/18:1-d9	0.0076151	0.05305	0.06465	0.0552	0.0513	0.0615	0.0536	0.0607	0.052	0.0451	0.0587	0.0543	0.0588	0.0569	0.0629	0.0549	0.0605	0.0636	0.0505	0.0559	0.0537	0.0583	0.066	0.061	0.0518	0.0571	0.0649	0.0519	0.0548	0.0462	0.0657	0.0571	0.0645	0.0533	0.0534	0.0513
SM 38:0;O2	SM	Positive	M+H	761.653	5.51	SM d18:1/18:1-d9	0.0264582	0.0166	0.0193	0.0138	0.01525	0.0154	0.0163	0.0152	0.014	0.0162	0.015	0.0169	0.0129	0.0147	0.0176	0.0167	0.0204	0.0159	0.0144	0.0145	0.0157	0.0161	0.0175	0.0147	0.0149	0.0168	0.0188	0.013	0.0148	0.011	0.0179	0.0181	0.0165	0.0134	0.0124	0.0147
SM 38:1;O2	SM	Positive	M+H	759.637	5.32	SM d18:1/18:1-d9	0.0224347	0.5525	0.732	0.605	0.6055	0.632	0.581	0.653	0.633	0.625	0.572	0.586	0.633	0.656	0.696	0.613	0.637	0.693	0.583	0.661	0.588	0.586	0.694	0.711	0.63	0.595	0.651	0.551	0.607	0.497	0.677	0.623	0.629	0.584	0.602	0.585
SM 38:2;O2	SM	Positive	M+H	757.622	4.86	SM d18:1/18:1-d9	0.0233185	0.0645	0.0828	0.0758	0.07885	0.07115	0.0729	0.0898	0.0826	0.0799	0.067	0.0644	0.0706	0.0896	0.0885	0.059	0.0819	0.0805	0.0742	0.0768	0.059	0.0615	0.0805	0.0861	0.0766	0.0592	0.0735	0.0688	0.0835	0.0679	0.0764	0.0728	0.0759	0.072	0.0753	0.0569
SM 39:1;O2	SM	Positive	M+H	773.653	5.6	SM d18:1/18:1-d9	0.0141638	0.0593	0.0808	0.0658	0.06325	0.06215	0.0682	0.0702	0.0738	0.0661	0.0602	0.0672	0.0716	0.0723	0.0714	0.0615	0.076	0.0706	0.0616	0.0706	0.0581	0.0621	0.068	0.0735	0.0603	0.0677	0.0736	0.0633	0.0605	0.0513	0.0711	0.0747	0.0642	0.0619	0.0567	0.00136
SM 39:2;O2	SM	Positive	M+H	771.637	5.12	SM d18:1/18:1-d9	0.110925	0.00408	0.005835	0.006535	0.006215	0.002428	0.00742	0.00567	0.00796	0.00702	0.00661	0.000583	0.005	0.0074	0.000332	0.00347	0.00621	0.00641	0.00513	0.00576	0.00286	0.00481	0.00859	0.00597	0.00532	0.00503	0.00724	0.00448	0.00585	0.000233	0.00556	0.00591	0.00499	0.0056	0.00685	0.00308
SM 40:0;O2	SM	Positive	M+H	789.684	6.03	SM d18:1/18:1-d9	0.112966	0.0272	0.03275	0.02485	0.0276	0.02925	0.0317	0.0292	0.0246	0.0255	0.0317	0.0294	0.026	0.0318	0.0291	0.0291	0.0338	0.0317	0.0223	0.0282	0.0274	0.0309	0.0293	0.0288	0.0252	0.0301	0.0326	0.0258	0.0259	0.0204	0.0332	0.0349	0.0267	0.0236	0.0281	0.0198
SM 40:1;O2	SM	Positive	M+H	787.669	5.82	SM d18:1/18:1-d9	0.0865766	0.9635	1.3	1.105	1.175	1.045	1.03	1.12	1.01	1.11	0.945	0.98	1.17	1.18	1.26	0.935	1.15	1.22	1.05	1.12	1.01	1.13	1.07	1.23	0.977	1.04	1.18	1	0.987	0.874	1.25	1.14	1.02	0.981	1.01	0.995
SM 40:2;O2	SM	Positive	M+H	785.653	5.37	SM d18:1/18:1-d9	0.0120247	0.244	0.306	0.269	0.257	0.243	0.248	0.256	0.268	0.254	0.22	0.243	0.252	0.167	0.294	0.224	0.287	0.275	0.252	0.256	0.221	0.265	0.283	0.313	0.252	0.235	0.284	0.232	0.255	0.199	0.263	0.268	0.255	0.253	0.232	0.221
SM 40:3;O2	SM	Positive	M+H	783.637	4.86	SM d18:1/18:1-d9	0.0536219	0.05255	0.0667	0.06465	0.05735	0.063	0.0624	0.0623	0.0638	0.0549	0.0631	0.0517	0.0562	0.0656	0.0625	0.06	0.0669	0.0672	0.0609	0.0539	0.0568	0.0543	0.0658	0.0692	0.0527	0.061	0.0575	0.0547	0.0687	0.0536	0.0687	0.0602	0.0574	0.0649	0.0516	0.0536
SM 41:1;O2	SM	Positive	M+H	801.684	6.12	SM d18:1/18:1-d9	0.0553882	0.221	0.2775	0.2345	0.24	0.2435	0.252	0.25	0.25	0.23	0.226	0.249	0.252	0.263	0.28	0.23	0.277	0.266	0.234	0.253	0.217	0.244	0.249	0.282	0.227	0.204	0.284	0.224	0.246	0.194	0.271	0.25	0.24	0.248	0.234	0.223
SM 41:2;O2	SM	Positive	M+H	799.669	5.67	SM d18:1/18:1-d9	0.0167387	0.123	0.152	0.131	0.1235	0.125	0.131	0.134	0.143	0.126	0.116	0.129	0.135	0.148	0.141	0.123	0.153	0.145	0.126	0.135	0.117	0.13	0.138	0.15	0.122	0.13	0.159	0.116	0.13	0.101	0.142	0.153	0.136	0.129	0.117	0.105
SM 42:0;O2	SM	Positive	M+H	817.716	6.65	SM d18:1/18:1-d9	0.0247093	0.00917	0.012	0.00883	0.010745	0.01225	0.0108	0.0117	0.00699	0.0105	0.0111	0.0104	0.0103	0.0103	0.0114	0.0126	0.0141	0.0136	0.0109	0.0102	0.0102	0.0116	0.0108	0.0121	0.00955	0.0115	0.0137	0.0107	0.0123	0.00908	0.0135	0.0143	0.0085	0.00892	0.0108	0.00866
SM 42:1;O2	SM	Positive	M+H	815.7	6.43	SM d18:1/18:1-d9	0.00332627	0.7755	1.002	0.8965	0.979	0.8515	0.75	0.925	0.984	0.943	0.823	0.746	0.922	1.12	1.12	0.82	0.855	0.915	0.918	0.955	0.79	0.847	0.947	1.12	0.943	0.783	0.975	0.805	0.915	0.74	0.929	0.835	0.894	0.981	0.871	0.794
SM 42:1;O3	SM	Positive	M+H	831.695	5.57	SM d18:1/18:1-d9	0.0376244	0.00581	0.009085	0.00725	0.007925	0.00667	0.0061	0.00743	0.00733	0.00789	0.00769	0.00688	0.0077	0.00858	0.00965	0.00669	0.00934	0.00854	0.00781	0.00785	0.00612	0.00735	0.00707	0.0102	0.0065	0.0078	0.00888	0.00718	0.0074	0.00642	0.00938	0.00786	0.00878	0.00667	0.00718	0.00367
SM 42:2;O2	SM	Positive	M+H	813.684	5.84	SM d18:1/18:1-d9	0.0874771	4.95	6.375	5.42	5.515	5.27	5.47	5.48	4.95	5.12	4.83	4.81	5.74	5.67	5.79	4.83	5.9	5.74	5.16	4.97	5.21	5.6	5.2	6.25	4.42	5.28	6.09	4.87	4.88	4.01	6.2	5.74	4.98	4.89	4.63	5
SM 42:3;O2	SM	Positive	M+H	811.669	5.37	SM d18:1/18:1-d9	0.0132383	1.16	1.485	1.34	1.2	1.405	1.18	1.23	1.44	1.23	1.27	1.15	1.23	1.45	1.36	1.31	1.4	1.36	1.25	1.18	1.3	1.3	1.43	1.51	1.12	1.41	1.38	1.14	1.25	0.934	1.56	1.3	1.24	1.27	1.09	1.26
SM 43:1;O2	SM	Positive	M+H	829.716	6.64	SM d18:1/18:1-d9	0.0283569	0.0133	0.0192	0.0165	0.0185	0.0124	0.0152	0.016	0.0154	0.0187	0.011	0.0133	0.0167	0.0172	0.0223	0.0121	0.0174	0.019	0.0157	0.0214	0.0121	0.0152	0.0154	0.0211	0.0154	0.0108	0.0173	0.0146	0.0164	0.0129	0.0175	0.0152	0.0142	0.0185	0.0165	0.00962
SM 43:2;O2	SM	Positive	M+H	827.7	6.05	SM d18:1/18:1-d9	0.0632926	0.02065	0.0284	0.0237	0.02475	0.02205	0.0237	0.022	0.0221	0.0223	0.0212	0.0242	0.0194	0.0259	0.0212	0.0219	0.0266	0.0268	0.0212	0.0224	0.0218	0.0228	0.0253	0.0289	0.0201	0.0209	0.0271	0.0193	0.0268	0.0171	0.0215	0.0222	0.0218	0.022	0.0205	0.0187
SM 44:2;O2	SM	Positive	M+H	841.716	6.38	SM d18:1/18:1-d9	0.023801	0.01645	0.0223	0.02195	0.0209	0.0186	0.0161	0.019	0.0258	0.0226	0.0185	0.0174	0.0179	0.0255	0.0241	0.0179	0.0183	0.0197	0.0205	0.0213	0.018	0.0173	0.0216	0.03	0.0225	0.0161	0.0223	0.0193	0.0205	0.016	0.021	0.0178	0.0194	0.0226	0.0188	0.0171
SM 44:3;O2	SM	Positive	M+H	839.7	5.92	SM d18:1/18:1-d9	0.0688611	0.0109	0.01395	0.0134	0.011515	0.01245	0.0107	0.012	0.0151	0.0122	0.0117	0.0111	0.0117	0.0144	0.0118	0.00938	0.0129	0.0121	0.0121	0.0102	0.0112	0.0119	0.0128	0.0139	0.00939	0.0106	0.0121	0.0112	0.0121	0.00875	0.0119	0.0117	0.0109	0.0117	0.00976	0.00734
TG 48:0	TG	Positive	M+NH4	824.77	9.53	TG 15:0/18:1-d7/15:0	0.00115848	0.369	0.22	0.42	0.1705	0.322	0.567	0.307	0.812	0.213	0.393	0.598	0.273	0.836	0.245	0.366	0.484	0.235	0.711	0.24	0.382	0.0599	0.127	0.062	0.0237	0.0607	0.0237	0.0518	0.0628	0.0237	0.0474	0.0512	0.0237	0.0237	0.0237	0.0799
TG 50:0	TG	Positive	M+NH4	852.801	9.88	TG 20:0/20:1/20:0-d5	0.0811419	0.08	0.05225	0.0681	0.03925	0.0763	0.103	0.047	0.0811	0.0318	0.0744	0.0935	0.0364	0.084	0.0289	0.0688	0.0635	0.0363	0.0696	0.0208	0.0637	0.00592	0.0131	0.00433	0.001965	0.00784	0.00393	0.00465	0.00442	0.001965	0.00668	0.001965	0.001965	0.001965	0.001965	0.008
TG 50:1	TG	Positive	M+NH4	850.786	9.57	TG 15:0/18:1-d7/15:0	0.028273	1.395	0.643	0.685	1.0405	1.295	1.07	0.306	0.49	0.196	0.784	0.824	0.2	0.519	0.402	0.603	0.434	0.177	0.343	0.288	0.434	0.116	0.431	0.0774	0.116	0.171	0.0965	0.0505	0.0921	0.0599	0.11	0.0984	0.0448	0.0224	0.0672	0.132
TG 50:2	TG	Positive	M+NH4	848.77	9.25	TG 15:0/18:1-d7/15:0	0.0294452	1.2	0.5765	0.555	0.9945	1.08	0.753	0.194	0.218	0.111	0.377	0.495	0.0863	0.2	0.3	0.293	0.151	0.0709	0.0977	0.122	0.156	0.0657	0.363	0.035	0.0666	0.102	0.053	0.0301	0.065	0.0325	0.0579	0.0573	0.0245	0.01225	0.0342	0.0775
TG 50:3	TG	Positive	M+NH4	846.755	8.9	TG 15:0/18:1-d7/15:0	0.0202521	0.2945	0.18	0.1475	0.2925	0.291	0.213	0.0656	0.0669	0.0374	0.092	0.126	0.0277	0.0694	0.0943	0.0638	0.0397	0.0212	0.0243	0.0335	0.0363	0.0167	0.113	0.00989	0.0194	0.0271	0.0137	0.0117	0.0254	0.00605	0.0184	0.015	0.0108	0.003025	0.00874	0.026
TG 51:2	TG	Positive	M+NH4	862.786	9.45	TG 15:0/18:1-d7/15:0	0.0232678	0.06495	0.0331	0.0296	0.06035	0.04705	0.0435	0.0209	0.018	0.0143	0.0224	0.0335	0.00758	0.0158	0.0251	0.0153	0.0147	0.011	0.012	0.0153	0.0141	0.0063	0.0221	0.00315	0.0081	0.00776	0.00643	0.00741	0.0137	0.00653	0.00315	0.00773	0.00315	0.00315	0.0107	0.00315
TG 52:1	TG	Positive	M+NH4	878.817	9.91	TG 20:0/20:1/20:0-d5	0.0125159	0.563	0.2505	0.224	0.422	0.567	0.403	0.0989	0.132	0.0727	0.28	0.301	0.0619	0.119	0.116	0.234	0.126	0.0566	0.0913	0.0638	0.141	0.0327	0.13	0.0213	0.0261	0.0455	0.0186	0.0153	0.0189	0.0155	0.028	0.0244	0.0099	0.0098	0.0185	0.0375
TG 52:2	TG	Positive	M+NH4	876.801	9.61	TG 15:0/18:1-d7/15:0	0.0369368	3.925	1.885	1.785	3.19	3.25	2.67	0.779	0.84	0.515	1.21	1.59	0.368	0.486	1.07	0.918	0.622	0.288	0.322	0.545	0.539	0.262	1.22	0.154	0.295	0.353	0.207	0.0966	0.179	0.13	0.195	0.232	0.08	0.0738	0.123	0.23
TG 52:3	TG	Positive	M+NH4	874.786	9.29	TG 15:0/18:1-d7/15:0	0.0183245	2.72	1.295	1.325	2.355	2.075	1.67	0.516	0.523	0.277	0.651	0.949	0.188	0.306	0.671	0.488	0.324	0.15	0.171	0.302	0.262	0.123	0.744	0.0895	0.155	0.173	0.107	0.052	0.108	0.0568	0.0986	0.122	0.0383	0.0398	0.0576	0.132
TG 52:4	TG	Positive	M+NH4	872.77	8.95	TG 15:0/18:1-d7/15:0	0.0296949	0.4735	0.2915	0.275	0.4885	0.4365	0.329	0.117	0.127	0.0669	0.142	0.171	0.0497	0.08	0.138	0.0983	0.0588	0.0344	0.0399	0.0539	0.061	0.0232	0.149	0.0172	0.0322	0.0377	0.0177	0.0207	0.0443	0.00755	0.0234	0.0372	0.00851	0.013	0.0073	0.0192
TG 53:2	TG	Positive	M+NH4	890.817	9.77	TG 20:0/20:1/20:0-d5	0.142587	0.0331	0.01655	0.0149	0.0295	0.02595	0.0173	0.00388	0.00373	0.00308	0.00619	0.0109	0.0012	0.00182	0.00577	0.00468	0.00308	0.00151	0.00259	0.00197	0.00305	0.00081	0.0042	0.000355	0.00173	0.0001775	0.000722	0.0001775	0.00134	0.000546	0.000699	0.000851	0.0001775	0.0001775	0.0001775	0.0001775
TG 53:3	TG	Positive	M+NH4	888.801	9.47	TG 15:0/18:1-d7/15:0	0.0134662	0.0818	0.0435	0.0405	0.0732	0.0602	0.051	0.0212	0.0228	0.0136	0.0202	0.0367	0.00921	0.0102	0.0245	0.016	0.012	0.0105	0.00893	0.00811	0.0107	0.00665	0.0285	0.00235	0.00601	0.00412	0.00516	0.00115	0.00472	0.00447	0.0023	0.00364	0.00115	0.00115	0.00115	0.00449
TG 54:2	TG	Positive	M+NH4	904.833	9.95	TG 20:0/20:1/20:0-d5	0.108616	0.7225	0.37	0.2535	0.552	0.6025	0.381	0.0834	0.0691	0.0592	0.163	0.195	0.0412	0.0441	0.0979	0.122	0.0632	0.0394	0.0315	0.0336	0.0634	0.0304	0.103	0.0127	0.0269	0.0357	0.0195	0.00967	0.0118	0.0131	0.0241	0.0182	0.00669	0.0044	0.00819	0.0184
TG 54:3	TG	Positive	M+NH4	902.817	9.67	TG 15:0/18:1-d7/15:0	0.00031034	4.515	2.07	1.83	3.47	3.075	3.04	1.02	1.1	0.677	1.18	1.92	0.449	0.458	1.15	0.836	0.716	0.313	0.329	0.51	0.452	0.248	1.04	0.146	0.283	0.291	0.19	0.0884	0.183	0.119	0.152	0.232	0.0632	0.067	0.12	0.183
TG 54:4	TG	Positive	M+NH4	900.801	9.33	TG 15:0/18:1-d7/15:0	0.0376453	2.065	1.13	1.16	1.945	1.545	1.44	0.514	0.545	0.306	0.521	0.768	0.207	0.284	0.586	0.382	0.302	0.161	0.183	0.268	0.219	0.11	0.515	0.082	0.154	0.134	0.0848	0.0458	0.0914	0.0592	0.0783	0.102	0.036	0.0444	0.0465	0.0956
TG 54:5	TG	Positive	M+NH4	898.786	9.05	TG 15:0/18:1-d7/15:0	0.00985735	0.4	0.2885	0.279	0.4435	0.3715	0.267	0.129	0.149	0.0763	0.127	0.14	0.0606	0.0897	0.137	0.0887	0.0642	0.0472	0.0559	0.0663	0.0551	0.0299	0.141	0.0299	0.0449	0.0373	0.0274	0.0194	0.0449	0.0109	0.0184	0.0407	0.0114	0.0179	0.00927	0.025
TG 56:3	TG	Positive	M+NH4	930.848	9.98	TG 20:0/20:1/20:0-d5	0.0971304	0.161	0.08445	0.0734	0.135	0.123	0.098	0.0265	0.0266	0.0195	0.0339	0.0449	0.0118	0.015	0.0271	0.0246	0.0169	0.00888	0.00935	0.00878	0.0135	0.00634	0.02	0.00355	0.00702	0.00643	0.00414	0.00118	0.00311	0.00195	0.005	0.00405	0.000347	0.000694	0.000347	0.0043
TG 56:4	TG	Positive	M+NH4	928.833	9.69	TG 15:0/18:1-d7/15:0	0.0162241	0.2225	0.1145	0.116	0.204	0.185	0.149	0.0564	0.0681	0.0381	0.0726	0.0883	0.0258	0.0296	0.0641	0.0485	0.0349	0.0177	0.0198	0.026	0.0298	0.00941	0.0449	0.00658	0.0164	0.0141	0.00741	0.00299	0.00803	0.00306	0.00776	0.00973	0.00065	0.0013	0.00208	0.00377
TG 56:5	TG	Positive	M+NH4	926.817	9.53	TG 15:0/18:1-d7/15:0	0.0189707	0.2005	0.1315	0.131	0.207	0.182	0.14	0.0665	0.082	0.0464	0.0735	0.0838	0.0328	0.0429	0.0538	0.0514	0.0443	0.0233	0.0242	0.0291	0.0358	0.025	0.0558	0.0155	0.0145	0.0119	0.0147	0.00563	0.0114	0.0027	0.00841	0.012	0.00147	0.000735	0.00212	0.000735
TG 56:6	TG	Positive	M+NH4	924.801	9.2	TG 15:0/18:1-d7/15:0	0.0190172	0.174	0.15	0.1535	0.2045	0.1415	0.137	0.073	0.0876	0.0471	0.056	0.0753	0.0372	0.0554	0.0477	0.036	0.0417	0.0252	0.033	0.029	0.0239	0.0215	0.0511	0.0163	0.0148	0.00937	0.016	0.0072	0.0145	0.00708	0.00516	0.00971	0.00597	0.00721	0.00792	0.00389
TG O-50:2	TG	Positive	M+NH4	862.822	10.06	TG 15:0/18:1-d7/15:0	0.0758596	0.00533	0.006095	0.004855	0.006995	0.006885	0.00497	0.00359	0.0039	0.00483	0.00391	0.00382	0.00318	0.00329	0.00469	0.003	0.00434	0.00469	0.00384	0.00244	0.00253	0.00321	0.0048	0.00269	0.00589	0.000458	0.00329	0.00316	0.00432	0.00459	0.000916	0.00469	0.00406	0.00313	0.00362	0.000458
TG O-50:3	TG	Positive	M+NH4	860.807	9.78	TG 15:0/18:1-d7/15:0	0.128842	0.00385	0.0034	0.00304	0.00469	0.002265	0.00232	0.0022	0.00172	0.00159	0.00106	0.00107	0.00146	0.00198	0.00511	0.000321	0.00153	0.00176	0.00465	0.00291	0.000319	0.000417	0.00305	0.000882	0.00346	0.0001595	0.00278	0.00269	0.00155	0.00349	0.000348	0.0022	0.000455	0.00252	0.00243	0.0001595
TG O-52:3	TG	Positive	M+NH4	888.838	10.09	TG 15:0/18:1-d7/15:0	0.130454	0.002195	0.002405	0.001253	0.003035	0.0023	0.00144	0.001	0.000378	0.00151	0.00087	0.000798	0.000396	0.000987	0.0019	0.00115	0.00189	0.00112	0.0007	0.000532	0.000189	0.000494	0.00135	0.00099	0.000453	0.000189	0.000398	0.000447	0.00112	0.000497	0.000189	0.000435	0.000499	0.00167	0.000683	0.000189

## Sheet: Liver Individual Lipid FC
Analyte	liver_RT_35	liver_RT_90	liver_RT_120	liver_IW_35	liver_IW_90	liver_IW_120
Cer 18:0;O2/16:0	2.02645	2.93467	3.23809	1.14724	1.22676	1.45874
Cer 18:0;O2/22:0	1.24502	1.44005	1.47579	1.11787	1.11817	1.22531
Cer 18:0;O2/24:0	1.02541	1.16382	1.23524	0.971464	1.03671	1.07505
Cer 18:0;O2/24:1	1.31771	1.42739	1.6636	0.964628	1.08135	1.13527
Cer 18:1;O2/16:0	2.57086	3.51949	4.00255	1.16567	1.24728	1.44469
Cer 18:1;O2/18:0	2.12147	2.62233	3.05267	1.02139	1.08736	1.35135
Cer 18:1;O2/20:0	1.9532	2.30919	2.71802	1.03454	1.13807	1.33835
Cer 18:1;O2/21:0	1.83451	1.85183	2.34082	0.913626	0.907989	1.13851
Cer 18:1;O2/22:0	1.49336	1.67499	2.0381	0.935904	1.03156	1.1778
Cer 18:1;O2/23:0	1.42877	1.57458	1.77682	0.990228	1.02507	1.16976
Cer 18:1;O2/24:0	1.31771	1.42739	1.6636	0.964628	1.08135	1.13527
Cer 18:1;O2/24:1	1.34122	1.45536	1.70199	0.992097	1.07845	1.26781
Cer 18:1;O2/26:0	1.19294	1.45343	1.07902	0.91065	0.962963	1.04213
Cer 18:2;O2/22:0	1.44017	1.59004	1.82821	1.06871	1.11933	1.29731
Cer 18:2;O2/23:0	1.07615	1.35192	1.59625	0.983598	1.05665	1.06543
Cer 18:2;O2/24:1	1.31863	1.44802	1.63634	1.07015	1.14322	1.31621
Cer	1.54397	1.82778	2.06545	1.01577	1.08389	1.22744
Cer2	1.54397	1.82778	2.06545	1.01577	1.08389	1.22744
HexCer 18:1;O2/18:0	0.824483	0.738002	0.649819	0.974078	0.908664	0.969062
HexCer 18:1;O2/20:0	0.628151	0.743132	0.611049	0.857555	0.89586	0.988738
HexCer 18:1;O2/24:0;O	0.933537	0.706352	0.801674	0.615402	0.814105	0.692353
HexCer	0.795391	0.729162	0.687514	0.815679	0.872877	0.883384
HexCer2	0.795391	0.729162	0.687514	0.815679	0.872877	0.883384
SM 32:1;O2	0.872331	0.798468	0.798396	0.975814	0.903022	0.953298
SM 33:1;O2	0.883924	0.878379	0.820128	0.936289	0.955613	1.00375
SM 33:2;O3	1.84846	3.35186	2.9188	1.68605	4.00774	3.37106
SM 34:0;O2	0.935006	0.970212	0.89363	0.977778	1.04356	1.00069
SM 34:1;O2	0.967469	0.945764	0.876066	0.940757	1.0081	0.992136
SM 34:1;O3	0.875239	0.900398	0.804311	0.863695	0.95761	0.960451
SM 34:2;O2	0.849261	0.73381	0.702695	0.970441	0.835301	0.859781
SM 35:1;O2	0.904884	0.887506	0.831612	0.922884	1.00973	0.956344
SM 36:0;O2	1.01075	1.09027	0.96879	1.02561	0.966203	1.10599
SM 36:1;O2	0.982327	0.985847	0.957094	1.0041	1.04889	1.08502
SM 36:2;O2	1.04214	0.704971	0.727026	1.01212	0.974294	0.915002
SM 37:1;O2	0.940315	0.897119	0.922766	0.94356	0.911971	0.960898
SM 38:0;O2	0.976037	1.0295	1.03773	0.847561	0.865569	1.03447
SM 38:1;O2	1.01143	0.983115	0.981695	0.932821	1.0042	1.06735
SM 38:2;O2	0.880545	0.867239	0.843084	0.80255	0.850699	0.902036
SM 39:1;O2	0.977679	1.01539	1.00366	0.952822	0.98753	1.06171
SM 40:0;O2	1.0913	1.05467	1.05171	0.969549	1.04153	1.07525
SM 40:1;O2	1.00819	1.02605	1.01834	0.93909	0.976831	1.0728
SM 40:2;O2	0.998057	0.960773	0.960094	0.919053	0.96294	1.0169
SM 41:1;O2	1.01615	1.02249	1.03956	0.929227	1.02953	1.10696
SM 41:2;O2	0.959069	0.999617	0.951582	0.949039	0.935192	0.994996
SM 41:3;O2	0.912906	0.919089	0.916695	0.940998	0.910752	0.998362
SM 42:0;O2	0.984393	1.05224	1.066	0.896804	0.956471	1.02947
SM 42:0;O3	1.03476	1.12071	1.09025	0.954538	1.03786	1.14743
SM 42:1;O3	0.924968	1.00445	0.930548	0.954844	0.99576	0.968902
SM 42:2;O2	1.00191	1.01772	1.00336	0.931333	0.957109	1.04202
SM 42:3;O2	0.987073	0.932811	0.955656	0.895428	0.936648	0.993246
SM 42:4;O2	1.0018	0.947714	0.792313	0.959309	0.810277	0.91776
SM 42:5;O2	0.936423	0.935126	0.940371	0.688996	0.889179	0.929696
SM 43:1;O2	0.980651	1.02042	1.07892	0.97846	1.02694	1.11049
SM 43:2;O2	0.968587	0.931684	0.931484	0.85061	0.906359	0.968382
SM	0.992389	1.03179	0.994012	0.953295	1.05495	1.08396
SM2	0.992389	1.03179	0.994012	0.953295	1.05495	1.08396
DG 34:2	1.04635	0.893657	0.821469	0.977733	0.931738	0.977779
DG 34:3	1.07912	1.01606	0.827099	1.13107	0.887846	0.876998
DG 36:3	1.13225	1.01249	0.938673	1.06308	0.957564	1.07481
DG 38:4	1.25024	1.16095	1.06817	1.12698	0.981825	1.14902
DG 38:5	1.21733	1.15764	1.22767	1.04994	1.01028	1.04719
DG 40:7	1.10999	0.962852	0.986425	1.05876	0.88276	1.022
DG 40:8	1.2512	1.25856	1.91546	1.59659	1.19788	1.49872
DG	1.15521	1.06603	1.11214	1.14345	0.978556	1.09236
DG2	1.15521	1.06603	1.11214	1.14345	0.978556	1.09236
TG 46:0	0.830471	0.811993	0.765354	0.973882	0.817776	0.953471
TG 46:1	0.834009	0.705496	0.690372	0.914636	0.826609	0.770576
TG 48:0	0.955137	0.86536	0.775588	1.01919	0.955394	0.951133
TG 48:1	0.845165	0.749839	0.715993	0.918243	0.848695	0.808319
TG 48:2	0.772682	0.735714	0.688545	0.860999	0.798135	0.762389
TG 48:3	0.790861	0.64702	0.615328	0.841103	0.758416	0.775664
TG 48:4	0.72473	0.572035	0.413012	0.823935	0.533733	0.632449
TG 49:0	1.26021	1.41741	0.982516	1.30141	1.26211	1.36253
TG 49:1	0.908626	0.812468	0.736828	0.964972	0.862537	0.827436
TG 49:3	0.774535	0.688017	0.608052	0.873376	0.7977	0.808683
TG 50:1	0.893696	0.80267	0.728165	0.94586	0.859332	0.869188
TG 50:2	0.857257	0.817318	0.753919	0.940737	0.846985	0.841473
TG 50:3	0.78513	0.729077	0.644276	0.885595	0.784751	0.746574
TG 50:4	0.789576	0.664015	0.624101	0.872623	0.763756	0.775708
TG 51:0	0.975953	0.894111	1.09267	1.11363	0.892405	0.98365
TG 51:1	0.83355	0.784146	0.714068	0.93854	0.848494	0.822529
TG 51:2	0.824051	0.745013	0.690565	0.93084	0.826119	0.796427
TG 51:3	0.811337	0.747315	0.661216	0.895331	0.806992	0.773336
TG 51:4	0.810551	0.725075	0.707469	0.88995	0.753499	0.770901
TG 52:0	0.875045	0.870256	0.776356	1.04326	0.859432	0.97247
TG 52:1	0.897809	0.802575	0.755114	0.937219	0.900874	0.877813
TG 52:2	0.848254	0.80708	0.749297	0.985576	0.836933	0.832229
TG 52:3	0.862716	0.823746	0.769983	0.976589	0.829791	0.858664
TG 52:4	0.818045	0.716647	0.642784	0.906087	0.778593	0.770774
TG 52:5	0.859263	0.727265	0.589055	0.856269	0.801095	0.742591
TG 52:6	0.827497	0.748131	0.675836	0.896196	0.616104	0.803385
TG 53:3	0.832195	0.735969	0.669501	0.916937	0.827287	0.769575
TG 53:4	0.812803	0.740361	0.673832	0.900323	0.784233	0.810876
TG 53:5	0.820708	0.739983	0.659521	0.94382	0.774543	0.772101
TG 54:3	0.836989	0.80848	0.762979	0.923564	0.849953	0.836253
TG 54:4	0.858118	0.818971	0.763802	0.977518	0.851828	0.827105
TG 54:5	0.828541	0.728626	0.676612	0.907413	0.791141	0.792505
TG 54:7	0.821348	0.663127	0.627465	0.760676	0.537944	0.717203
TG 55:4	0.855581	0.747499	0.685061	0.93207	0.854967	0.796813
TG 55:5	0.872726	0.814236	0.740804	0.956802	0.83959	0.837084
TG 55:6	0.817377	0.729647	0.633349	0.893002	0.757051	0.742946
TG 56:3	0.79492	0.692476	0.747765	0.822706	0.822426	0.80822
TG 56:4	0.842499	0.804834	0.743803	0.922509	0.82919	0.834142
TG 56:6	0.859989	0.785926	0.717733	0.926231	0.832259	0.823666
TG 56:7	0.82377	0.746865	0.685562	0.922249	0.788447	0.772381
TG 56:8	0.843989	0.687153	0.647331	0.900226	0.761654	0.790788
TG 56:9	0.813333	0.674215	0.632994	0.825717	0.758694	0.794167
TG 57:3	0.849954	0.729279	0.685983	0.930351	0.800661	0.784421
TG 57:4	0.825697	0.751427	0.660539	0.933481	0.80315	0.764385
TG 58:6	0.854426	0.777163	0.695518	0.949177	0.836991	0.809454
TG 58:7	0.86416	0.809699	0.739912	0.969266	0.827962	0.841043
TG 58:8	0.858863	0.734215	0.686189	0.920651	0.781905	0.78401
TG 58:9	0.869283	0.706796	0.655043	0.907448	0.771017	0.813046
TG 59:4	0.6545	0.601999	0.660687	1.23208	0.856337	0.839455
TG 60:10	0.852245	0.759366	0.715575	0.922983	0.7687	0.757553
TG 60:11	0.842667	0.735302	0.690773	0.909243	0.707771	0.702869
TG 60:4	0.848736	0.801662	0.745213	0.968592	0.862876	0.861135
TG 60:5	0.845272	0.783443	0.722207	0.956152	0.828887	0.797223
TG 60:6	0.843947	0.755346	0.703677	0.919708	0.79863	0.82159
TG 60:7	0.873436	0.773108	0.714957	0.957549	0.824881	0.818898
TG 60:8	0.881302	0.810663	0.708979	0.851209	0.833631	0.807014
TG 70:3	0.838635	0.820495	0.67937	0.981486	0.856698	0.839647
TG 72:3	0.895723	0.829912	0.704924	0.93469	0.801847	0.798992
TG O-50:1	1.04712	0.965396	0.913287	1.04225	0.922969	0.964008
TG O-50:2	0.98671	0.968928	0.918153	0.997887	0.920201	0.971365
TG O-50:3	0.9145	0.925394	0.91556	0.977486	0.903807	0.916979
TG O-52:3	0.977165	0.941079	0.866795	1.0215	0.905847	0.96711
TG	0.855248	0.779175	0.716418	0.939048	0.818423	0.827039
TG2	0.855248	0.779175	0.716418	0.939048	0.818423	0.827039
LPC 16:0	1.101	1.14084	1.2187	0.995414	1.07756	0.980915
LPC 17:0	0.924361	1.10976	1.09092	1.06174	0.997836	1.06253
LPC 18:0	1.01729	1.05024	1.02165	1.05444	1.05289	1.04772
LPC 19:0	0.935959	0.981091	1.00493	1.01628	0.932321	1.03079
LPC 20:0	1.09205	1.02369	1.01795	1.04375	1.00294	0.965011
LPC 20:2	1.9421	2.82392	3.24604	1.21838	1.01751	1.35627
LPC 22:0	0.928488	0.978253	0.971591	0.908507	0.931501	0.882037
LPC 24:0	0.896379	0.9257	0.848154	1.00318	0.916678	0.818741
LPC 24:1	0.829692	0.955788	0.895693	0.969337	1.07294	0.980618
LPC	1.07415	1.22103	1.25729	1.03011	1.00024	1.01385
LPC2	1.07415	1.22103	1.25729	1.03011	1.00024	1.01385
PC 25:0	3.46463	4.74562	5.75248	2.5257	9.6151	4.78137
PC 28:0	0.999043	1.05797	1.0541	1.04196	0.825869	1.05349
PC 30:0	1.08943	0.952949	1.02862	0.998978	0.981544	1.06378
PC 30:1	0.986884	0.956558	1.01591	0.962753	0.898082	0.95139
PC 31:0	1.04133	1.03795	1.05586	0.96945	1.03515	0.984667
PC 31:1	0.958974	1.04669	1.0319	0.911247	0.943011	0.965743
PC 31:2	0.926209	0.885857	0.845155	0.953213	0.787616	0.82406
PC 32:0	1.01902	1.00352	1.00883	0.964025	0.97326	1.02809
PC 32:1	1.04646	1.01484	1.0052	0.950741	0.967844	0.987931
PC 32:2	0.985591	0.929535	0.978505	0.928902	0.850258	0.893944
PC 33:0	1.05337	1.04483	1.0893	0.924111	1.02243	1.04382
PC 33:1	1.01092	1.00981	1.00619	0.988831	0.953711	0.98118
PC 33:2	1.04363	0.975573	1.01671	0.989584	0.947625	0.974886
PC 33:3	0.937421	0.828495	0.813501	0.889138	0.73958	0.828572
PC 34:0	1.05861	1.04494	1.08016	0.963836	0.99192	1.08626
PC 34:1	1.07033	1.07785	1.06563	1.00419	1.04149	1.08823
PC 34:2	1.03844	0.977599	0.976259	0.997505	0.921923	0.975415
PC 34:3	0.982168	0.93316	0.929694	0.945061	0.860579	0.92411
PC 34:4	0.962007	0.842231	0.887144	0.908249	0.765688	0.857177
PC 35:1	1.03484	1.01024	1.02063	0.978576	0.937947	0.998686
PC 35:2	0.99915	0.946245	0.965778	0.929427	0.894879	0.966025
PC 35:3	0.984617	0.869916	0.931413	0.947001	0.845248	0.921443
PC 35:4	0.955085	0.867204	0.910046	0.899746	0.802528	0.882355
PC 36:0	1.06785	1.08823	1.12263	0.95731	0.98176	1.11077
PC 36:1	1.05654	0.991822	1.03696	0.957693	0.949605	1.06114
PC 36:2	1.00713	0.999981	1.04153	0.921103	0.930815	0.999483
PC 36:3	0.980064	0.920362	0.932821	0.958785	0.897205	0.93758
PC 36:4	1.01722	0.933285	0.91989	0.913297	0.850052	0.903064
PC 36:5	0.911584	0.832555	0.896396	0.895103	0.745327	0.811408
PC 36:6	0.999539	0.964075	0.955355	0.983596	0.870879	0.975589
PC 37:1	1.00859	0.977333	1.03094	0.931005	0.928837	1.02658
PC 37:2	1.01864	0.957563	1.02247	0.953005	0.910113	1.00997
PC 37:3	0.955695	0.966079	0.97818	0.94976	0.86409	0.968174
PC 37:4	0.947829	0.89263	0.86955	0.946595	0.812203	0.857206
PC 37:6	0.946588	0.798519	0.846647	0.97918	0.697956	0.794766
PC 38:0	1.04343	0.918723	1.00295	0.860484	0.928258	0.857754
PC 38:1	0.992428	0.987823	1.0365	0.941584	0.908195	0.988168
PC 38:2	1.05294	0.963768	1.00948	0.925424	0.924758	1.02448
PC 38:3	0.99708	0.974318	0.970206	0.982102	0.854259	0.969096
PC 38:4	1.01387	0.937126	0.976524	0.967613	0.890467	0.982006
PC 38:5	0.959212	0.844953	0.864674	0.941152	0.794697	0.843158
PC 38:6	0.942957	0.83971	0.848688	0.917697	0.759186	0.825756
PC 38:7	0.939782	0.774477	0.798984	0.902562	0.702885	0.785616
PC 39:2	1.07453	1.14609	1.32381	0.982506	1.05302	1.21058
PC 39:3	0.935122	0.931711	0.963012	0.887762	0.856858	1.04382
PC 39:4	0.975033	0.897709	0.909002	0.934042	0.805747	0.886617
PC 39:5	0.945441	0.814001	0.778436	0.879938	0.762426	0.86455
PC 39:6	1.02179	0.882489	0.847623	0.973203	0.757521	0.82973
PC 39:7	0.863221	0.768266	0.85799	1.07365	0.71835	0.776857
PC 40:4	0.958496	0.872542	0.897433	0.920077	0.838713	0.899622
PC 40:6	0.943345	0.832092	0.834804	0.897394	0.746193	0.831809
PC 40:7	0.964723	0.747429	0.808563	0.940111	0.691241	0.807585
PC 40:8	0.903432	0.727151	0.787605	0.864874	0.62688	0.711202
PC 42:10	0.895577	0.636168	0.664389	0.883145	0.546893	0.661413
PC 42:4	0.892682	0.855982	0.866139	0.836334	0.746138	0.871921
PC 42:5	1.00334	0.863838	0.87319	0.875125	0.79153	0.912785
PC 42:7	0.92846	0.772408	0.800939	0.882206	0.689706	0.815622
PC 42:8	0.754892	0.423626	0.429435	0.735852	0.342834	0.411533
PC 44:11	0.847814	0.607645	0.652563	0.868856	0.496332	0.523915
PC 44:12	1.14737	0.94108	1.35616	1.19261	0.644861	1.47356
PC 44:8	0.426548	0.805036	0.623275	0.815399	0.597364	0.908324
PC	1.01621	0.969642	1.01483	0.96394	0.975696	0.987473
PC2	1.01621	0.969642	1.01483	0.96394	0.975696	0.987473
LPC O-16:0	0.939915	0.962067	0.930216	1.02504	0.996495	1.02283
LPC O-18:0	0.884957	1.082	0.850083	0.934304	1.00806	0.928608
LPC O-18:1	1.0297	1.0883	1.07167	0.941883	0.957335	0.969092
LPC O	0.951522	1.04412	0.950656	0.967076	0.987297	0.973509
LPC O2	0.951522	1.04412	0.950656	0.967076	0.987297	0.973509
PC O-16:0_16:0	0.956704	1.05466	1.04589	0.960823	1.06769	1.00282
PC O-16:0_18:2	0.991881	0.786356	0.751428	0.895044	1.12115	0.94416
PC O-16:0_20:4	0.894751	0.925494	0.876094	0.900749	0.919777	0.881645
PC O-16:1_16:0	0.963106	0.944288	0.886792	0.940408	0.852507	0.867954
PC O-16:1_18:1	0.955377	1.06915	1.03867	0.975096	1.04979	1.04594
PC O-16:1_20:4	0.839769	0.786213	0.790618	0.962211	0.761281	0.745887
PC O-18:0_20:4	0.94662	0.918631	0.917613	0.90153	0.957071	0.960381
PC O-18:1_18:1	0.967285	1.01282	1.06154	0.940409	1.07972	1.06796
PC O-18:1_18:2	0.929781	0.86525	1.0112	0.898198	1.04974	0.98696
PC O-18:1_20:4	0.872382	0.9442	0.875407	0.920263	0.927408	0.879275
PC O-36:0	0.948146	1.14727	1.07284	0.890642	0.995014	0.950357
PC O-40:11	0.959525	0.933088	0.887174	0.929883	0.972555	0.873025
PC O-40:4	0.889408	1.00842	0.921201	0.913699	0.95109	0.959216
PC O-40:6	0.552937	0.542502	0.617278	0.725223	0.656125	0.455291
PC O	0.904834	0.924168	0.910982	0.911013	0.954352	0.901491
PC O2	0.904834	0.924168	0.910982	0.911013	0.954352	0.901491
LPE 20:0	1.05223	1.16531	1.22644	1.00022	1.20186	1.13964
LPE 20:2	1.97387	2.70486	2.62268	1.03453	1.29478	1.48834
LPE	1.51305	1.93509	1.92456	1.01737	1.24832	1.31399
LPE2	1.51305	1.93509	1.92456	1.01737	1.24832	1.31399
PE 32:0	1.0108	1.01386	1.03869	0.941226	0.989297	0.97221
PE 32:1	0.966992	1.00103	1.00856	0.990711	0.971285	0.990981
PE 34:1	0.984061	0.968387	0.951544	0.93255	0.939717	0.941873
PE 34:2	0.970128	0.949562	0.949301	0.953318	0.936313	0.94963
PE 34:3	0.957604	0.890269	0.921021	0.911495	0.914228	0.925704
PE 35:2	0.927261	0.805494	0.806803	0.924724	0.813336	0.886591
PE 36:1	0.999313	1.00769	1.04444	0.924816	0.946926	0.937928
PE 36:2	0.96747	0.954323	0.981065	0.94528	0.928659	0.935678
PE 36:3	0.96195	0.920666	0.908383	0.940665	0.899734	0.921189
PE 36:4	0.966143	0.915648	0.909869	0.950167	0.851646	0.873313
PE 36:5	0.952446	0.824488	0.839273	0.896673	0.801006	0.826385
PE 37:4	0.946412	0.874258	0.897581	0.941896	0.817584	0.85216
PE 38:2	0.992151	0.973451	0.996864	0.896779	0.898857	0.900157
PE 38:4	0.964912	0.91782	0.920276	0.916814	0.848329	0.876244
PE 38:6	0.971392	0.909894	0.88728	0.932805	0.848009	0.878333
PE 40:5	0.980053	0.942546	0.947994	0.908778	0.829964	0.865424
PE 40:6	0.994381	0.971204	1.01187	0.944752	0.813778	0.88093
PE 40:7	0.91808	0.820135	0.855156	0.926453	0.772971	0.814567
PE 40:8	0.909946	0.781755	0.785664	0.872352	0.686278	0.728324
PE 42:10	0.881447	0.750571	0.741035	0.733146	0.510691	0.595075
PE 42:7	0.926553	0.79823	0.820032	0.947388	0.768722	0.806533
PE 42:8	0.854487	0.680827	0.730348	0.830695	0.625307	0.69911
PE	0.954727	0.894187	0.906957	0.916522	0.836938	0.866288
PE2	0.954727	0.894187	0.906957	0.916522	0.836938	0.866288
LPE O-16:1	0.94953	1.25833	1.35834	0.877368	0.884589	1.09456
LPE O-18:1	0.961004	1.22805	1.28603	0.826736	0.843476	1.06756
LPE O-18:2	0.896946	1.30293	1.37179	0.853164	0.938133	1.08109
LPE O-20:1	0.942516	0.819034	1.02787	0.824509	0.637375	0.934038
LPE O	0.937499	1.15209	1.26101	0.845444	0.825893	1.04431
LPE O2	0.937499	1.15209	1.26101	0.845444	0.825893	1.04431
PE O-16:1_16:0	0.943212	0.604202	0.886612	0.822721	0.591662	0.637308
PE O-16:1_18:1	0.939625	0.822241	0.830911	0.866871	0.80573	0.831437
PE O-16:1_18:2	0.855202	0.786098	0.790115	0.86426	0.772567	0.759508
PE O-16:1_20:4	0.900776	0.783225	0.810817	0.908775	0.72457	0.800217
PE O-16:1_22:6	0.874454	0.754801	0.729128	0.872168	0.679456	0.736785
PE O-18:1_18:1	0.955948	0.842013	0.811732	0.873144	0.811265	0.813155
PE O-18:1_18:2	0.907691	0.802468	0.828105	0.898411	0.774513	0.781179
PE O-18:1_20:4	0.939929	0.780827	0.787155	0.875289	0.759032	0.779709
PE O-18:1_22:6	0.883101	0.752249	0.761204	0.876209	0.693682	0.749637
PE O-18:2_18:2	0.792014	0.615825	0.718173	0.919129	0.597477	0.721902
PE O-18:2_20:4	0.901641	0.772424	0.781779	0.884881	0.711313	0.772615
PE O-38:3	0.813052	0.563502	0.585882	0.721436	0.728734	0.622901
PE O-38:4	0.891676	0.782516	0.819559	0.847183	0.731125	0.728702
PE O-40:5	0.686541	0.713176	0.77667	0.931278	0.5344	0.682916
PE O-40:6	0.908645	0.789996	0.776729	0.834259	0.738376	0.807115
PE O-40:8	0.869781	0.705045	0.681967	0.849123	0.658721	0.682039
PE O-42:6	1.22108	1.00383	0.943143	1.47204	1.3474	1.51722
PE O	0.89908	0.75732	0.783511	0.901011	0.744707	0.789667
PE O2	0.89908	0.75732	0.783511	0.901011	0.744707	0.789667
LPG 18:1	0.888273	0.848365	0.739933	0.734326	0.593848	0.533073
LPG 18:2	1.09775	1.08389	1.12107	0.621506	0.476679	0.437997
LPG	0.99301	0.966126	0.930502	0.677916	0.535264	0.485535
LPG2	0.99301	0.966126	0.930502	0.677916	0.535264	0.485535
PG 32:0	0.948877	0.735694	0.840798	0.841768	0.955954	0.837355
PG 32:1	0.970591	0.91722	0.893344	0.947852	0.989109	0.955213
PG 34:2	0.985815	0.958848	0.906631	0.929984	0.882964	0.898807
PG 36:1	0.871994	0.694181	0.673428	0.904361	0.622489	0.711966
PG 36:2	1.02751	0.98419	0.985233	0.967849	0.965759	0.973671
PG 36:3	0.958893	0.892721	0.90274	0.946364	0.875257	0.934452
PG 38:4	1.24216	1.30092	1.0915	1.23392	0.870516	0.893735
PG 38:5	0.922396	0.75518	0.796622	0.893492	0.731478	0.760378
PG 38:6	0.930011	0.772943	0.758372	0.960798	0.738574	0.777702
PG 40:6	0.961685	0.902668	0.939549	0.916885	0.942491	0.894366
PG 40:7	0.894804	0.691476	0.684627	0.908826	0.673471	0.711058
PG 40:8	0.890618	0.758366	0.703918	0.906761	0.738952	0.715983
PG	0.967113	0.863701	0.848064	0.946571	0.832251	0.838724
PG2	0.967113	0.863701	0.848064	0.946571	0.832251	0.838724
LPI 16:0	1.00276	1.19694	1.24275	0.991946	1.03947	1.15098
LPI 18:0	0.828544	0.927339	1.00446	0.928722	0.906394	1.04816
LPI 18:1	1.09688	1.37169	1.52287	1.0495	1.13513	1.31936
LPI 18:2	1.63132	2.47669	2.51983	0.965554	0.990968	1.38236
LPI 20:3	1.19296	1.58528	1.54988	0.926974	0.848418	0.950508
LPI 20:4	1.16821	1.27975	1.42543	0.880406	0.763114	0.910079
LPI	1.15345	1.47295	1.5442	0.957183	0.947249	1.12691
LPI2	1.15345	1.47295	1.5442	0.957183	0.947249	1.12691
PI 32:0	0.814443	0.707367	0.597096	0.919012	0.747085	0.795758
PI 32:1	0.767515	0.604708	0.530304	0.848912	0.697247	0.793919
PI 34:0	0.861741	0.775346	0.701156	0.9594	0.822886	0.863174
PI 34:1	0.82678	0.727099	0.663495	0.932167	0.774676	0.82164
PI 34:2	0.958654	0.949126	0.918553	0.945518	0.901951	0.960782
PI 35:2	0.924447	0.842316	0.967444	0.942846	0.76322	0.928284
PI 36:1	1.00679	0.994239	0.961227	0.978202	0.982232	1.06735
PI 36:2	0.994578	1.03963	1.03321	0.997004	0.978696	1.05038
PI 36:3	0.966402	0.947936	0.920701	0.930058	0.879165	0.930159
PI 36:4	0.931263	0.895866	0.873086	0.910078	0.816065	0.892356
PI 36:5	0.829038	0.645942	0.620924	0.84953	0.633906	0.694943
PI 37:4	0.956834	0.9191	0.912828	0.95031	0.83973	0.91
PI 38:3	0.998426	1.03655	1.02372	0.988769	0.956228	1.03969
PI 38:4	0.960775	0.932169	0.930902	0.950937	0.866888	0.933851
PI 38:5	0.92186	0.870045	0.83696	0.903096	0.778634	0.846913
PI 38:6	0.875232	0.748427	0.706717	0.923516	0.667792	0.75782
PI 40:5	0.941307	0.953546	0.919713	0.951578	0.832847	0.88173
PI 40:6	0.945412	0.87135	0.850484	0.909826	0.782665	0.867606
PI O-18:1_20:4	0.735541	0.585319	0.886131	0.715956	0.465194	0.997145
PI	0.90616	0.84453	0.834455	0.921406	0.799321	0.8965
PI2	0.90616	0.84453	0.834455	0.921406	0.799321	0.8965
LPS 18:0	1.19199	1.65786	1.85473	1.09266	1.22098	1.54282
LPS 18:1	1.64894	2.62551	2.84478	1.04496	1.41525	1.6999
LPS 20:4	1.52266	1.84179	2.09056	0.974327	0.865587	1.13109
LPS	1.45453	2.04172	2.26336	1.03731	1.16727	1.45794
LPS2	1.45453	2.04172	2.26336	1.03731	1.16727	1.45794
PS 34:1	0.955882	0.896002	0.876275	1.05919	1.01223	0.993872
PS 36:1	0.970637	0.920331	0.850525	1.05091	0.956678	0.983913
PS 36:2	0.939997	0.952814	0.843701	1.06174	0.953526	0.984531
PS 36:4	0.877261	0.81049	0.725175	0.987859	0.851295	0.875087
PS 38:1	0.877167	0.6809	0.709282	0.605057	0.612682	0.507402
PS 38:2	0.948569	1.00008	0.779671	0.983754	1.00667	1.00904
PS 38:3	0.885456	0.942177	0.816995	1.01265	0.904774	0.933514
PS 38:4	0.904228	0.847364	0.747789	1.00176	0.846892	0.886213
PS 40:2	0.945479	0.785652	0.597671	1.00568	0.742642	0.777617
PS 40:4	0.917513	0.859215	0.750856	1.01569	0.839171	0.881842
PS 40:5	0.844292	0.736308	0.645892	0.938866	0.75882	0.803452
PS 40:6	0.839006	0.720451	0.618988	0.989155	0.778699	0.825723
PS 40:7	0.774933	0.610436	0.47058	0.896594	0.749947	0.733274
PS	0.898494	0.827863	0.725646	0.969916	0.847233	0.861191
PS2	0.898494	0.827863	0.725646	0.969916	0.847233	0.861191

## Sheet: Kidney Individual Lipid FC
Analyte	kidney_RT_35	kidney_RT_90	kidney_RT_120	kidney_IW_35	kidney_IW_90	kidney_IW_120
Cer 18:0;O2/16:0	5.11732	7.17737	6.01318	1.26495	1.38794	1.0106
Cer 18:0;O2/22:0	1.42806	1.60206	1.35841	1.02848	0.983391	0.812615
Cer 18:1;O2/16:0	4.00677	5.38262	4.69526	1.25269	1.25365	0.990108
Cer 18:1;O2/18:0	3.7608	4.86257	4.17418	1.23767	1.3383	0.94064
Cer 18:1;O2/20:0	2.56105	3.10108	2.61977	1.20669	1.23578	0.896341
Cer 18:1;O2/22:0	1.76338	1.95512	1.58714	1.06574	1.10139	0.75688
Cer 18:1;O2/23:0	1.54927	1.57935	1.28917	1.03466	1.11213	0.797309
Cer 18:1;O2/24:0	1.39718	1.38815	1.16742	1.06791	1.05022	0.745505
Cer 18:1;O2/24:1	1.7976	1.96651	1.61238	1.15755	1.24703	0.88028
Cer 18:1;O2/26:0	1.33671	1.25253	1.09303	1.16292	1.17964	0.861905
Cer 18:2;O2/16:0	4.26389	6.14228	4.88091	1.46253	1.47244	1.11886
Cer 18:2;O2/22:0	1.76634	2.0541	1.73078	1.12755	1.21873	0.863624
Cer 18:2;O2/23:0	1.61806	1.69754	1.41622	1.13044	1.24619	0.840693
Cer 18:2;O2/24:1	1.76356	1.97251	1.66016	1.16306	1.23389	0.890939
Cer	2.43786	3.00956	2.52129	1.16878	1.21862	0.886164
Cer2	2.43786	3.00956	2.52129	1.16878	1.21862	0.886164
HexCer 18:1;O2/22:0	0.78164	0.709259	0.518869	0.765142	0.75617	0.549799
HexCer	0.78164	0.709259	0.518869	0.765142	0.75617	0.549799
HexCer2	0.78164	0.709259	0.518869	0.765142	0.75617	0.549799
SM 32:1;O2	0.86379	0.796412	0.596359	0.890892	0.889134	0.664649
SM 32:2;O2	0.768813	0.700372	0.428274	0.887265	0.8053	0.630209
SM 33:1;O2	0.941303	0.863644	0.617233	0.934653	0.937329	0.634614
SM 34:0;O2	0.866073	0.882191	0.617292	1.02816	0.887446	0.66538
SM 34:1;O2	0.91579	0.897643	0.63338	0.930166	0.868862	0.68555
SM 34:1;O3	0.904804	0.825924	0.43059	0.868897	0.887224	0.603807
SM 34:2;O2	0.878863	0.84244	0.587036	0.925774	0.891793	0.683454
SM 35:1;O2	0.906398	0.923358	0.620822	1.06757	0.884365	0.640575
SM 36:0;O2	0.878175	0.832697	0.600978	0.966541	0.838047	0.650481
SM 36:1;O2	0.979705	0.863484	0.662356	0.926707	0.882331	0.631391
SM 36:2;O2	0.915194	0.866496	0.602023	0.999637	0.955211	0.70293
SM 37:1;O2	1.05673	0.954897	0.703961	1.01476	0.98875	0.735176
SM 38:0;O2	0.9211	0.933531	0.680853	0.918669	0.884507	0.661569
SM 38:1;O2	0.925233	0.923408	0.699157	0.944535	0.916595	0.684633
SM 38:2;O2	0.862691	0.825197	0.635122	0.96827	0.886161	0.678336
SM 39:1;O2	0.922037	0.931863	0.698948	0.938781	0.890629	0.669612
SM 39:2;O2	1.02489	0.995216	0.740717	0.988877	1.01717	0.731493
SM 40:0;O2	0.971282	0.924819	0.705612	0.982305	0.899811	0.676628
SM 40:1;O2	0.971282	0.992021	0.735413	0.90783	0.880351	0.663156
SM 40:2;O2	0.937825	0.919105	0.71788	0.952939	0.905167	0.675955
SM 40:3;O2	0.876952	0.863966	0.693979	0.961772	0.9216	0.727388
SM 41:0;O2	0.974612	0.908774	0.730851	0.963379	0.938658	0.664251
SM 41:1;O2	0.966906	0.923246	0.728826	0.911257	0.884041	0.659905
SM 41:2;O2	0.960374	0.944968	0.706633	0.915494	0.930298	0.670071
SM 42:0;O2	0.985714	0.950411	0.711636	0.932285	0.885462	0.639044
SM 42:0;O3	1.01646	0.959361	0.758118	0.932937	0.893497	0.658106
SM 42:1;O2	1.00872	0.957791	0.736882	0.989217	0.950276	0.672684
SM 42:2;O2	0.987053	1.00552	0.744487	0.921916	0.892564	0.678685
SM 42:3;O2	0.949237	0.927345	0.730644	0.961213	0.929485	0.693206
SM 42:4;O2	0.952183	0.872577	0.680182	1.00451	0.917941	0.71825
SM 43:1;O2	0.929198	0.924227	0.679104	0.900679	0.874523	0.619995
SM 43:2;O2	0.979944	0.735022	0.742802	1.00053	0.873215	0.690837
SM 43:3;O2	1.03308	0.981348	0.769178	0.963193	0.975448	0.787647
SM 44:1;O2	0.966182	0.937422	0.712957	0.922342	0.892768	0.660595
SM 44:2;O2	1.02154	1.02257	0.802023	0.969782	0.966713	0.690104
SM 44:3;O2	1.08845	1.03692	0.832665	1.03026	0.997645	0.749649
SM	0.94746	0.906839	0.67986	0.953444	0.908898	0.676389
SM2	0.94746	0.906839	0.67986	0.953444	0.908898	0.676389
DG 34:1	1.41157	1.4442	1.20427	1.20809	1.39164	1.13307
DG 34:2	1.18982	1.39844	1.07131	1.07414	1.32386	1.09503
DG 34:3	1.61087	1.45171	1.33577	1.31297	1.60936	1.30657
DG 36:1	1.46873	1.59414	1.28947	1.19389	1.38271	1.20006
DG 36:2	1.41763	1.48057	1.2506	1.32677	1.56298	1.2477
DG 36:3	1.43552	1.6231	1.33384	1.33345	1.56424	1.33791
DG 36:4	1.63679	1.68512	1.46043	1.33793	1.74391	1.57883
DG 38:4	1.26039	1.39163	1.21354	1.00681	1.12574	0.922844
DG 38:5	1.32886	1.41315	1.25824	1.12729	1.1997	1.04138
DG 40:7	1.21814	1.37436	1.10301	1.08192	1.22986	1.06909
DG	1.39783	1.48564	1.25205	1.20033	1.4134	1.19325
DG2	1.39783	1.48564	1.25205	1.20033	1.4134	1.19325
TG 34:0	1.00377	0.989537	0.808618	1.00031	0.927859	0.766434
TG 36:1	0.999624	1.02535	0.740287	0.95796	0.892224	0.732075
TG 42:0	0.951748	0.944058	0.77888	0.974483	0.903817	0.684745
TG 42:1	1.00853	1.00681	0.802856	0.992979	0.930096	0.763284
TG 42:2	1.02429	1.03322	0.761127	0.975648	0.945272	0.753758
TG 44:0	0.92116	0.947491	0.744782	0.91674	0.89388	0.66225
TG 44:1	0.99242	0.950642	0.739479	0.92613	0.886853	0.681499
TG 44:2	1.05087	1.01953	0.839085	1.02952	0.939366	0.778047
TG 44:3	0.979502	1.02644	0.769819	0.962647	0.942902	0.752246
TG 45:1	1.00666	1.03122	1.0193	1.00915	0.934733	0.946038
TG 46:0	0.960714	0.833772	0.678502	0.856955	0.848886	0.595611
TG 46:1	0.969546	0.934615	0.815667	0.985802	0.920866	0.673666
TG 46:2	1.01343	0.997973	0.742443	0.953731	0.912991	0.710378
TG 46:3	1.08966	1.03681	0.860778	1.0511	0.96491	0.784865
TG 47:1	0.980792	1.01798	0.953128	0.985695	0.915694	0.741662
TG 47:2	0.932285	0.953064	0.835232	0.937214	0.876702	0.763133
TG 48:1	0.965754	0.952594	0.738083	0.945352	0.925392	0.662547
TG 48:2	0.951358	0.927315	0.759331	0.96504	0.885666	0.66685
TG 48:3	1.03008	1.02676	0.754703	0.971941	0.940509	0.75563
TG 48:4	1.05706	1.03591	0.814315	1.03401	0.973275	0.788802
TG 49:1	0.997259	0.923093	0.805122	0.930388	0.920099	0.642126
TG 49:2	1.01874	0.975992	0.816853	0.998798	0.922281	0.672271
TG 49:3	0.970184	1.01294	0.754159	0.952244	0.89121	0.711083
TG 50:1	0.937997	0.902508	0.730015	0.931552	0.879973	0.591685
TG 50:2	0.970795	0.981425	0.811035	0.93377	0.891005	0.698417
TG 50:3	0.92435	0.97819	0.770816	0.941753	0.909859	0.677336
TG 50:4	1.03774	1.05496	0.75637	0.996042	0.955421	0.760979
TG 51:1	0.968619	0.88059	0.827558	0.967801	0.92558	0.642404
TG 51:2	1.0628	0.995901	0.834855	1.00862	0.948119	0.707975
TG 51:3	1.00599	0.957	0.797795	1.00767	0.898939	0.656783
TG 51:4	0.984464	1.01087	0.815524	1.00055	0.945575	0.682262
TG 52:1	0.951863	0.932138	0.744189	0.968627	0.933605	0.667683
TG 52:2	0.907099	0.946196	0.796326	1.01121	0.890518	0.688187
TG 52:3	0.98433	0.962561	0.838972	0.922512	0.908888	0.703912
TG 52:4	0.976582	1.06745	0.851418	1.03864	0.959115	0.732484
TG 52:5	1.00051	1.07621	0.776628	0.999583	0.948894	0.73257
TG 53:1	0.868244	1.00352	0.840649	0.957264	0.951613	0.906381
TG 53:2	0.885179	0.964951	0.852804	1.006	0.902813	1.17794
TG 53:3	0.993661	0.970207	0.778551	1.02061	0.902625	0.651796
TG 53:4	1.00509	0.936407	0.772131	0.992888	0.880174	0.676243
TG 53:5	0.983754	0.958654	0.823205	1.01613	0.921632	0.678201
TG 54:1	0.864805	0.970869	0.816388	0.918916	0.968446	0.885485
TG 54:2	0.854565	1.08077	0.81994	1.01196	0.934765	1.26946
TG 54:3	0.97556	0.95099	0.794506	0.991898	0.94963	0.733767
TG 54:4	0.990848	0.940907	0.844791	0.906948	0.927749	0.655213
TG 54:5	0.983913	1.03956	0.840896	1.00681	0.905189	0.706307
TG 54:6	0.964091	0.991326	0.754824	0.974064	0.898409	0.724317
TG 55:1	0.89239	0.965361	0.842743	0.958016	0.918361	0.822697
TG 55:2	0.916694	1.05235	0.853924	1.00379	0.948036	0.996698
TG 55:3	0.886557	1.01757	0.831982	0.973295	0.908312	1.12219
TG 55:6	1.00813	0.989789	0.820274	1.01306	0.894986	0.67318
TG 56:1	0.903468	0.990927	0.840572	0.959775	0.920108	0.797073
TG 56:2	0.883762	1.06161	0.844001	0.964565	0.966224	0.996973
TG 56:3	0.853103	1.0644	0.830466	0.975552	0.920814	1.20747
TG 56:4	0.995693	0.962686	0.811771	0.974341	0.952415	0.707967
TG 56:6	1.02893	0.985299	0.803192	0.998695	0.919305	0.679676
TG 56:7	0.984398	1.00758	0.814143	1.01379	0.929517	0.703864
TG 56:8	1.01703	1.07555	0.788227	1.03231	0.965865	0.760422
TG 56:9	1.07698	1.06931	0.81522	1.01132	0.958648	0.759067
TG 57:1	0.880604	0.969028	0.836651	0.953238	0.926672	0.757461
TG 57:2	0.893138	1.01144	0.832349	0.955979	0.89089	0.843719
TG 57:3	1.03124	0.998635	0.795951	1.0115	0.951927	0.580607
TG 57:4	0.986833	0.98392	0.791022	0.992261	0.918829	0.625295
TG 58:1	0.860958	0.964738	0.801541	0.971641	0.950174	0.752227
TG 58:10	0.964352	1.09207	0.916983	1.03605	0.988959	1.34314
TG 58:2	0.89901	1.03811	0.86528	0.994283	0.899414	0.79259
TG 58:3	0.895625	1.08294	0.862281	0.990209	0.969222	0.959642
TG 58:4	0.878888	1.07723	0.853559	0.983687	0.934963	1.11669
TG 58:5	0.916075	0.996497	0.894171	0.998563	0.92326	1.1942
TG 58:6	1.03807	0.998887	0.800742	1.03851	0.928766	0.66461
TG 58:7	1.0221	0.950025	0.81391	0.969785	0.906708	0.672459
TG 58:8	1.00024	1.04003	0.844464	1.01774	0.913866	0.701846
TG 58:9	0.998847	1.01654	0.768688	0.978558	0.913751	0.738968
TG 59:2	0.894946	1.02685	0.845546	0.997648	0.900784	0.733335
TG 59:3	0.918049	1.02685	0.832357	0.964661	0.906008	0.831193
TG 59:4	1.05701	1.02599	0.802791	1.04405	0.964504	0.585515
TG 60:10	1.01029	1.02665	0.662614	1.00899	0.948946	0.6704
TG 60:11	1.08476	1.03995	0.871942	1.04713	1.05102	0.737407
TG 60:12	1.11782	1.104	0.828636	1.0412	0.986816	0.775484
TG 60:2	0.888987	1.02875	0.827137	1.00314	0.925622	0.734427
TG 60:3	0.909801	1.05519	0.87617	1.00383	0.893736	0.784084
TG 60:4	0.99684	1.02568	0.810687	1.00634	0.970936	0.575429
TG 60:5	1.00352	1.02826	0.825994	1.00158	0.961368	0.600986
TG 60:6	0.988012	0.937639	0.806538	0.980057	0.920109	0.624099
TG 60:7	1.00711	0.959276	0.720832	1.03837	0.928354	0.653069
TG 60:8	1.17233	1.1141	0.939491	1.08139	0.948832	0.786203
TG 62:2	1.0068	0.972251	0.768005	0.99703	0.907012	0.492748
TG 63:3	0.984478	0.972272	0.783097	1.01591	0.931626	0.536387
TG O-50:1	1.04382	1.01362	0.785561	0.981296	0.958174	0.596065
TG O-50:2	1.04367	1.02848	0.805467	1.02726	0.96425	0.607948
TG O-50:3	1.00689	0.979107	0.793932	0.963859	0.91776	0.639129
TG O-52:3	1.03047	0.999166	0.804644	1.01721	0.948874	0.611808
TG	0.976489	0.999825	0.810742	0.98736	0.928139	0.752644
TG2	0.976489	0.999825	0.810742	0.98736	0.928139	0.752644
LPC 14:0	1.61973	2.10509	1.84819	0.970596	0.906474	0.695081
LPC 15:0	1.13845	1.2075	1.23774	0.830366	0.796278	0.716818
LPC 16:0	1.20106	1.22071	0.943908	1.01204	0.920137	0.695598
LPC 16:1	1.64485	2.01105	1.77992	0.960256	0.87663	0.670175
LPC 17:0	1.02711	0.922333	0.729405	0.981399	0.88366	0.634854
LPC 18:0	0.963256	0.927668	0.720588	0.976414	0.887231	0.648964
LPC 18:1	1.55398	1.80946	1.49427	0.997798	0.935636	0.691636
LPC 18:2	1.70226	2.03403	1.90761	1.06063	0.984545	0.758471
LPC 18:3	2.31526	2.08183	1.7314	1.91666	1.88082	0.886364
LPC 19:0	0.97863	0.930523	0.722452	0.959888	0.901207	0.715218
LPC 20:0	0.99989	0.99303	0.785215	0.991505	0.915264	0.700358
LPC 20:1	1.25929	1.3775	1.12864	1.01402	0.924589	0.72897
LPC 20:2	1.73395	2.11856	1.85072	1.08189	1.00176	0.756995
LPC 20:3	1.83244	2.22269	1.99067	1.1167	1.16289	0.893701
LPC 20:4	1.7588	2.19013	2.26084	1.00318	1.00046	0.807183
LPC 22:0	1.0249	0.966461	0.769931	0.991737	0.926268	0.728474
LPC 22:4	2.18971	2.8341	2.89202	1.18187	1.1781	0.992079
LPC 22:5	2.26749	3.04073	3.15914	1.21468	1.21079	1.04577
LPC 22:6	2.01777	2.72758	3.02065	1.05539	1.10496	0.960461
LPC 24:0	0.958689	0.942745	0.742038	0.999906	0.919272	0.69316
LPC	1.50938	1.73319	1.58577	1.06585	1.01585	0.771017
LPC2	1.50938	1.73319	1.58577	1.06585	1.01585	0.771017
PC 29:0	1.01654	0.985811	0.784432	0.796396	0.958201	0.735496
PC 30:0	1.09646	0.944615	0.712585	0.871908	0.962901	0.730684
PC 30:1	0.970179	0.92904	0.728654	0.866273	0.9539	0.749114
PC 31:0	1.05217	0.932309	0.767283	0.928858	0.99986	0.756478
PC 31:2	1.10489	1.09765	0.833933	1.10241	1.07452	0.826798
PC 32:0	1.02337	0.881761	0.730447	0.866557	0.938037	0.725933
PC 32:1	1.03624	0.965107	0.738487	0.893964	0.947878	0.758645
PC 32:2	1.05989	1.01993	0.790267	0.890889	0.982913	0.768104
PC 33:0	0.950175	0.852413	0.69174	0.891611	0.891924	0.709395
PC 33:1	0.99846	0.956016	0.731072	0.980774	0.952131	0.69529
PC 33:2	1.08616	0.974038	0.754796	0.865204	0.949034	0.739642
PC 33:3	1.18017	1.04428	0.915454	1.01852	1.13586	0.867873
PC 34:0	1.11781	1.03858	0.788606	0.929748	1.03215	0.799655
PC 34:1	1.09056	0.942748	0.74041	0.911489	0.927446	0.721622
PC 34:2	1.0652	0.974807	0.762725	0.927405	1.01937	0.775849
PC 34:3	1.13599	1.00144	0.819434	0.926616	1.03436	0.797384
PC 34:4	1.12459	0.988642	0.870481	0.945095	1.05488	0.867329
PC 35:0	1.009	0.896672	0.760483	0.869099	0.918735	0.714107
PC 35:1	1.06998	0.913446	0.734855	0.933366	0.966334	0.76626
PC 35:2	1.06195	0.970623	0.760476	0.898482	0.998203	0.747381
PC 35:3	1.1005	0.930376	0.731434	0.874981	0.988002	0.75878
PC 35:4	1.14578	1.09443	0.904089	0.941	1.06964	0.80937
PC 36:0	1.06146	0.959216	0.791162	0.862805	0.971087	0.748176
PC 36:1	1.03498	0.965268	0.764397	0.895591	0.976718	0.781004
PC 36:2	0.976718	0.85865	0.71655	0.952123	0.947426	0.731153
PC 36:3	1.04875	0.998884	0.807427	1.01325	1.01507	0.812046
PC 36:4	1.09258	1.07467	0.871959	0.945789	1.04216	0.880303
PC 36:5	1.15681	1.124	0.938542	0.988765	1.11993	0.904375
PC 37:1	1.00474	0.930776	0.736237	0.877442	0.935417	0.715595
PC 37:2	1.18635	1.02699	0.852214	0.965343	1.08572	0.856111
PC 37:4	1.09658	1.03191	0.802044	0.999327	1.04043	0.810464
PC 37:6	1.18837	1.18645	0.969687	1.01609	1.1719	0.956882
PC 38:0	1.06327	0.971235	0.798146	0.9114	1.00947	0.727599
PC 38:1	1.07411	0.960085	0.766062	0.882639	0.986586	0.725569
PC 38:2	1.03332	0.944888	0.787215	0.902045	0.993129	0.773997
PC 38:3	1.08046	0.933806	0.77623	0.962822	0.973602	0.816932
PC 38:4	1.11652	0.92366	0.856082	0.977324	0.998043	0.770027
PC 38:5	1.16028	1.05821	0.932191	1.03223	1.14981	0.933186
PC 38:6	1.17728	1.05551	0.904657	0.966148	1.10118	0.881399
PC 38:7	1.13936	1.04184	0.922734	1.01755	1.15138	0.947762
PC 39:4	1.23586	1.04072	0.897851	1.02206	1.12649	0.898802
PC 39:5	1.17995	1.07277	0.929797	0.98963	1.1377	0.924569
PC 39:6	1.17768	1.09808	0.882339	1.02418	1.12914	0.902292
PC 39:7	1.30505	1.30841	1.16104	1.09038	1.29285	1.03797
PC 40:0	1.0277	0.930322	0.753842	0.868113	0.917607	0.671829
PC 40:4	1.22572	1.07446	0.894343	0.983037	1.17442	0.9415
PC 40:6	1.14808	1.06839	0.909284	0.97401	1.13147	0.887641
PC 40:7	1.33806	1.15346	0.987047	1.06977	1.21717	1.03782
PC 40:8	1.29151	1.27863	1.16091	1.1048	1.28247	1.12231
PC 42:1	0.976465	0.873648	0.741549	0.869218	0.873971	0.722399
PC 42:10	1.3864	1.31467	1.24719	1.23754	1.45281	1.20688
PC 42:2	1.04449	0.949014	0.737561	0.929993	0.929916	0.747785
PC 42:4	1.08379	1.02676	0.822725	0.995772	1.08696	0.871248
PC 42:7	1.16955	1.09286	0.966597	1.04159	1.22925	0.981743
PC 42:8	3.3117	3.06806	2.88998	2.98826	2.8088	3.20388
PC 44:10	2.26907	2.46274	2.40724	2.12826	2.4188	2.10395
PC 44:11	1.79816	2.01223	1.81029	1.65601	1.68396	1.67278
PC 44:4	1.17236	1.04086	0.882108	1.00401	1.11689	0.847443
PC 44:5	1.1468	1.07545	0.932266	0.943899	1.10256	0.885091
PC 44:8	1.31866	1.326	1.25836	1.13574	1.42157	1.19614
PC	1.17992	1.09414	0.921967	1.02259	1.116	0.907631
PC2	1.17992	1.09414	0.921967	1.02259	1.116	0.907631
LPC O-16:0	1.04727	0.95771	0.639274	1.01944	0.96402	0.676096
LPC O-16:1	0.95419	0.59153	0.388604	1.25012	1.22978	0.934356
LPC O-18:0	1.047	1.00532	0.68611	1.01037	0.930934	0.676025
LPC O-18:1	1.41466	1.48688	0.994807	1.0923	1.00556	0.695367
LPC O-18:2	1.97595	2.49461	1.71385	1.20123	1.10842	0.87113
LPC O	1.28781	1.30721	0.884529	1.11469	1.04774	0.770595
LPC O2	1.28781	1.30721	0.884529	1.11469	1.04774	0.770595
PC O-16:0_16:0	0.903357	0.751908	0.58525	0.848218	0.823566	0.587547
PC O-16:0_18:2	1.07535	0.922426	0.746409	0.975433	1.00294	0.709679
PC O-16:1_18:1	0.911498	0.802736	0.616228	0.864772	0.839785	0.62203
PC O-16:1_18:2	0.905092	0.904082	0.731765	0.942301	0.944771	0.680624
PC O-18:1_18:1	0.878369	0.82722	0.618136	0.857779	0.86953	0.613136
PC O-18:1_18:2	0.891693	0.76407	0.642316	0.875804	0.817203	0.563466
PC O-33:1	0.772188	0.641212	0.539837	0.906376	0.735893	0.541975
PC O-36:0	0.942891	0.801414	0.579899	0.90398	0.852802	0.606551
PC O-36:1	0.839657	0.775516	0.610762	0.821252	0.802059	0.57096
PC O-38:3	0.953243	0.836188	0.717615	0.844607	0.91563	0.589737
PC O	0.907334	0.802677	0.638822	0.884052	0.860417	0.60857
PC O2	0.907334	0.802677	0.638822	0.884052	0.860417	0.60857
LPE 16:0	1.08175	1.15667	0.84785	0.873322	0.802552	0.547862
LPE 16:1	0.990515	1.02521	0.617136	0.872749	0.779918	0.42944
LPE 17:0	1.32295	1.56153	1.14944	1.05716	0.989198	0.687461
LPE 18:0	1.50618	1.81451	1.36041	1.09506	1.04865	0.76852
LPE 18:1	1.03551	1.09105	0.834897	0.830255	0.784661	0.528037
LPE 18:2	1.08436	1.14914	0.865949	0.865775	0.847229	0.521494
LPE 20:0	0.942199	0.930742	0.616776	0.929591	0.871636	0.637353
LPE 20:1	1.85558	2.1525	1.62296	1.14838	1.15492	0.705143
LPE 20:3	0.983657	1.01067	0.787754	0.813733	0.832643	0.540967
LPE 20:4	0.934544	0.947659	0.73298	0.792892	0.838939	0.53014
LPE 20:5	0.916196	0.921745	0.666321	0.783668	0.750916	0.485646
LPE 22:4	0.839446	0.813632	0.621153	0.751693	0.751785	0.507546
LPE 22:5	0.93699	0.907294	0.701889	0.82321	0.845575	0.55159
LPE 22:6	0.876752	0.880703	0.65268	0.871488	0.855569	0.557679
LPE	1.09333	1.16879	0.862728	0.893499	0.868156	0.571348
LPE2	1.09333	1.16879	0.862728	0.893499	0.868156	0.571348
PE 32:0	1.01226	0.959048	0.694972	0.935873	0.945968	0.702245
PE 32:1	0.941486	0.983247	0.654758	0.98252	0.908741	0.694235
PE 34:1	0.961794	0.945563	0.708175	0.911317	0.914071	0.709489
PE 34:2	1.01675	0.970965	0.701913	0.958449	0.923129	0.702493
PE 34:3	0.96509	0.917229	0.725998	1.01166	0.922111	0.780021
PE 35:2	0.979426	0.955253	0.684422	0.937837	0.879052	0.718823
PE 36:2	1.00476	0.961737	0.710149	0.949832	0.947235	0.748796
PE 36:3	1.02186	0.95473	0.766467	1.00272	0.958918	0.770961
PE 36:4	1.05264	1.0653	0.74765	1.02083	0.969817	0.769631
PE 36:5	1.09925	1.0346	0.870263	0.99305	1.03306	0.855706
PE 37:4	1.08291	1.05872	0.799168	1.04383	1.05194	0.821464
PE 38:4	0.992511	1.0007	0.778551	0.947791	0.963515	0.750334
PE 38:6	1.0678	1.00498	0.813047	1.07798	0.967543	0.802853
PE 40:5	1.09508	1.0545	0.806956	1.03014	1.05883	0.844371
PE 40:6	1.06956	1.05435	0.817951	1.0083	1.03467	0.795975
PE 40:7	1.13129	1.11686	0.891494	1.13412	1.11704	0.900341
PE 40:8	1.20441	1.12588	1.00188	1.12707	1.19971	0.996905
PE 42:7	1.1197	1.0814	0.870233	1.00969	1.09456	0.863302
PE 42:8	2.17296	2.16819	2.02799	2.11567	1.59948	1.89454
PE	1.10482	1.07438	0.845897	1.06309	1.02576	0.848552
PE2	1.10482	1.07438	0.845897	1.06309	1.02576	0.848552
LPE O-16:1	1.59301	1.79955	1.368	1.13719	1.06008	0.752048
LPE O-18:1	1.48581	1.62039	1.23951	1.13412	1.01439	0.74649
LPE O-18:2	1.53456	1.78701	1.34695	1.1333	1.09942	0.776497
LPE O-20:1	1.12717	1.31348	1.00145	1.11207	0.872459	0.767528
LPE O	1.43514	1.63011	1.23898	1.12917	1.01159	0.760641
LPE O2	1.43514	1.63011	1.23898	1.12917	1.01159	0.760641
PE O-16:1_16:0	1.10245	1.1053	0.800329	1.11126	1.04645	0.837731
PE O-16:1_18:1	1.13973	1.09505	0.824112	1.12099	1.04956	0.843885
PE O-16:1_18:2	1.07719	1.04457	0.803788	1.02755	1.06279	0.838826
PE O-16:1_20:4	1.16338	1.14023	0.902602	1.09951	1.13166	0.886844
PE O-16:1_22:6	1.13027	1.13453	0.881416	1.11709	1.11367	0.926598
PE O-18:1_16:0	1.1254	1.07487	0.770738	1.05469	1.04232	0.761972
PE O-18:1_18:1	1.11757	1.06226	0.806309	1.07746	1.04722	0.809109
PE O-18:1_18:2	1.13047	1.08168	0.842021	1.08596	1.03879	0.840012
PE O-18:1_20:4	1.18921	1.12777	0.881084	1.15115	1.10439	0.903138
PE O-18:1_22:6	1.12449	1.09609	0.865688	1.07734	1.08484	0.906035
PE O-18:2_14:0	1.17702	1.17202	0.79752	1.09432	1.11469	0.813157
PE O-18:2_18:2	1.05799	1.05015	0.824838	1.01975	1.04355	0.840678
PE O-18:2_20:4	1.1527	1.13482	0.938998	1.10409	1.182	0.949216
PE O-35:2	1.11051	1.06527	0.821248	1.08492	1.0534	0.824924
PE O-35:3	1.12532	1.05196	0.794195	1.1124	1.02447	0.844834
PE O-36:6	1.15372	1.15913	0.886873	1.06248	1.10924	0.947
PE O-38:3	1.16966	1.09367	0.847367	1.07952	1.08292	0.881609
PE O-38:4	1.08765	1.00498	0.818458	1.03555	1.00013	0.786131
PE O-40:8	1.2175	1.19694	1.04555	1.20614	1.21695	1.02234
PE O	1.13433	1.09954	0.850165	1.09064	1.08153	0.866529
PE O2	1.13433	1.09954	0.850165	1.09064	1.08153	0.866529
LPG 16:0	3.618	4.7478	4.54962	1.22968	1.24628	1.0174
LPG 18:1	2.30368	2.58799	2.38012	1.02033	1.03935	0.744755
LPG 18:2	1.91754	2.13651	1.94222	1.11407	1.075	0.750104
LPG	2.61308	3.15744	2.95732	1.12136	1.12021	0.837418
LPG2	2.61308	3.15744	2.95732	1.12136	1.12021	0.837418
PG 32:0	0.981319	0.920596	0.673172	1.03413	0.926681	0.662816
PG 32:1	1.03382	1.03917	0.77617	1.08511	0.959986	0.690228
PG 34:1	1.18085	1.29992	0.974103	1.29709	1.23398	1.01267
PG 36:1	1.18688	1.24389	0.954442	1.24033	1.20504	0.975348
PG 36:2	0.943807	0.928582	0.678738	0.95131	0.920059	0.681405
PG 36:3	1.06719	1.02273	0.76859	1.08447	0.978309	0.764712
PG 38:5	1.24339	1.22362	0.986499	1.15665	1.12679	0.869589
PG 38:6	1.09618	1.13326	0.949547	1.18287	1.222	0.917551
PG 40:6	1.04274	1.04968	0.877758	1.09475	1.01617	0.805604
PG 40:7	1.16465	1.19523	0.986564	1.27329	1.20437	0.969041
PG	1.09408	1.10567	0.862558	1.14	1.07934	0.834896
PG2	1.09408	1.10567	0.862558	1.14	1.07934	0.834896
LPI 18:0	0.345505	0.357494	0.260363	0.933567	0.87728	0.60183
LPI 20:4	0.28004	0.220977	0.187864	0.976556	1.0491	0.776224
LPI	0.312773	0.289235	0.224114	0.955062	0.963192	0.689027
LPI2	0.312773	0.289235	0.224114	0.955062	0.963192	0.689027
PI 36:3	1.03063	0.981843	0.774894	1.03614	1.01573	0.763604
PI 37:4	0.999516	0.933151	0.721436	0.966297	0.974802	0.730502
PI	1.01507	0.957497	0.748165	1.00122	0.995264	0.747053
PI2	1.01507	0.957497	0.748165	1.00122	0.995264	0.747053
LPS 18:0	3.09261	4.32757	4.64349	1.45545	1.70495	1.60348
LPS 18:1	2.61562	3.40444	3.38448	1.08458	1.19647	0.981932
LPS 20:4	2.53004	3.31395	3.37505	1.09805	1.24149	1.06553
LPS	2.74609	3.68199	3.801	1.21269	1.38097	1.21698
LPS2	2.74609	3.68199	3.801	1.21269	1.38097	1.21698
PS 34:1	0.943123	0.966987	0.657321	1.03737	0.941241	0.659271
PS 36:1	0.926126	0.965125	0.657198	0.958531	1.01427	0.64963
PS 36:2	0.944825	0.96831	0.655907	1.01874	0.994321	0.66146
PS 36:4	1.04434	1.07228	0.810166	1.13797	1.14506	0.786838
PS 38:1	0.951169	0.973023	0.663531	0.995245	1.02209	0.638775
PS 38:2	0.946046	0.981444	0.628612	0.929741	0.997246	0.679764
PS 38:3	0.944652	0.952109	0.650581	0.918632	1.00146	0.660515
PS 38:4	0.974245	1.04615	0.742448	1.07501	1.05828	0.720042
PS 40:1	0.907831	0.941654	0.679445	0.948805	0.987642	0.633582
PS 40:2	0.943964	1.00436	0.674067	1.03154	1.00609	0.682952
PS 40:4	1.00057	1.07188	0.746543	1.05685	1.1252	0.749119
PS 40:5	0.952454	0.990486	0.685919	1.0268	1.03848	0.687884
PS 40:6	0.958304	1.02318	0.726835	1.08814	1.11817	0.752929
PS 40:7	1.10797	1.13694	0.922812	1.18405	1.2929	0.889894
PS	0.967544	1.00671	0.707242	1.0291	1.05303	0.703761
PS2	0.967544	1.00671	0.707242	1.0291	1.05303	0.703761

## Sheet: Heart Individual Lipid FC
Analyte	heart_RT_35	heart_RT_90	heart_RT_120	heart_IW_35	heart_IW_90	heart_IW_120
Cer 18:0;O2/16:0	4.80545	6.48032	5.61665	1.05479	1.42711	1.02159
Cer 18:1;O2/16:0	3.05772	4.31677	3.82177	1.11204	1.23666	0.962497
Cer 18:1;O2/18:0	2.51472	2.82967	2.39268	1.09872	1.1992	0.799568
Cer 18:1;O2/20:0	1.69894	1.8255	1.45673	0.993891	1.05129	0.686953
Cer 18:1;O2/21:0	1.70042	1.78273	1.39761	1.12466	1.0767	0.636253
Cer 18:1;O2/22:0	1.40299	1.53181	1.18844	1.00991	0.993206	0.667719
Cer 18:1;O2/23:0	1.33946	1.42299	1.20174	1.01427	0.951949	0.712943
Cer 18:1;O2/24:0	1.44999	1.45678	1.23761	1.01723	1.01992	0.688105
Cer 18:1;O2/24:1	1.63226	1.81949	1.46634	1.076	1.14649	0.775778
Cer 18:2;O2/22:0	1.33378	1.35185	1.14521	1.05552	1.09516	0.735147
Cer 18:2;O2/23:0	1.36959	1.42981	1.11603	1.06842	1.04582	0.748366
Cer 18:2;O2/24:1	1.42638	1.55365	1.35354	1.03043	1.1317	0.731354
Cer	1.97764	2.31678	1.94953	1.05466	1.1146	0.763856
Cer2	1.97764	2.31678	1.94953	1.05466	1.1146	0.763856
HexCer 18:1;O2/22:0	0.861884	0.809717	0.558567	1.00157	0.810109	0.650778
HexCer	0.861884	0.809717	0.558567	1.00157	0.810109	0.650778
HexCer2	0.861884	0.809717	0.558567	1.00157	0.810109	0.650778
SM 32:1;O2	0.891888	0.736065	0.563103	1.05277	1.04388	0.741373
SM 33:1;O2	0.862974	0.727211	0.519754	0.967368	0.902871	0.677479
SM 34:0;O2	0.912768	0.805744	0.567129	0.993701	0.980611	0.680647
SM 34:1;O2	0.901174	0.798466	0.60425	0.973477	0.959702	0.703587
SM 34:1;O3	0.851025	0.736992	0.573645	0.93004	0.931352	0.683838
SM 34:2;O2	0.939045	0.741986	0.565625	1.04003	1.02948	0.744111
SM 35:1;O2	0.904219	0.804237	0.595732	0.969394	0.933018	0.672156
SM 36:0;O2	0.982328	0.896107	0.635676	0.988717	1.00537	0.720532
SM 36:1;O2	0.949817	0.799687	0.632559	0.934139	0.966592	0.671382
SM 36:2;O2	0.898273	0.78553	0.553328	0.939815	0.917468	0.705369
SM 37:1;O2	0.949549	0.813729	0.650456	0.961479	0.962581	0.702956
SM 37:2;O2	0.856912	0.874835	0.646342	1.01243	1.05451	0.794887
SM 38:0;O2	7.71014	6.80634	4.66753	7.08116	7.59513	5.58024
SM 38:1;O2	0.998052	0.901595	0.700967	1.05913	0.964514	0.724669
SM 38:2;O2	0.895353	0.822565	0.660979	0.984126	0.921744	0.714821
SM 39:1;O2	0.973697	0.887648	0.676927	1.00423	0.977599	0.691331
SM 39:2;O2	0.986982	0.881569	0.682328	1.01013	0.972728	0.717031
SM 40:0;O2	0.882775	0.769413	0.621409	0.950969	0.876949	0.621324
SM 40:1;O2	0.951501	0.867705	0.668975	1.00231	0.952895	0.670247
SM 40:2;O2	0.971664	0.849659	0.685506	1.01174	0.969442	0.7064
SM 40:3;O2	0.835622	0.785968	0.596696	0.867341	0.94454	0.762342
SM 41:1;O2	0.939369	0.850114	0.658668	1.00537	0.942413	0.650588
SM 41:2;O2	1.00386	0.929466	0.699849	1.04162	1.05758	0.740817
SM 41:3;O2	1.49082	1.32651	1.25675	1.48741	2.033	1.43813
SM 42:0;O2	1.40337	1.23474	0.71219	1.49989	1.03977	0.944068
SM 42:1;O2	0.998991	0.892266	0.667151	1.01393	0.899212	0.682396
SM 42:2;O2	0.967414	0.871039	0.681522	1.00951	0.977072	0.683058
SM 42:3;O2	0.967222	0.854293	0.696488	1.00237	0.971491	0.737111
SM 43:1;O2	0.933837	0.852832	0.637386	1.01518	0.989362	0.680359
SM 43:2;O2	0.990182	0.812673	0.644532	1.05537	0.9473	0.737792
SM	1.19336	1.05723	0.790782	1.22884	1.22401	0.899368
SM2	1.19336	1.05723	0.790782	1.22884	1.22401	0.899368
DG 36:2	1.12849	1.26194	1.0701	0.926019	1.02886	0.812183
DG 36:3	0.978841	1.13407	1.04935	0.81069	0.901245	0.87404
DG 38:4	0.921811	1.25822	1.13349	0.893203	1.41948	1.43661
DG	1.00971	1.21808	1.08431	0.876637	1.11653	1.04094
DG2	1.00971	1.21808	1.08431	0.876637	1.11653	1.04094
TG 46:2	0.805403	0.888356	1.00588	1.0882	0.795096	0.800981
TG 48:0	1.03629	1.05399	0.837423	1.10188	1.02906	0.783844
TG 48:1	0.915909	1.00761	0.7662	1.00883	0.902554	0.720495
TG 48:2	0.940534	0.966055	0.823028	1.04002	0.920767	0.774603
TG 48:3	0.880841	0.860641	0.75549	0.848834	0.820265	0.826168
TG 49:2	0.964651	0.958471	0.904937	0.975349	0.940926	0.871674
TG 50:0	1.02715	0.96722	1.39139	1.04149	0.998351	0.870853
TG 50:1	1.05422	1.03667	0.722358	1.07565	1.00732	0.748467
TG 50:2	0.979374	0.98948	0.716034	1.06181	0.931489	0.717944
TG 50:3	0.936075	0.934372	0.747729	0.938938	0.931139	0.823849
TG 50:4	0.863027	0.858064	0.766152	0.773804	0.899876	0.872219
TG 51:1	0.901215	0.794848	0.762414	1.01763	0.854335	0.700584
TG 51:2	0.95224	0.860794	0.771867	0.965669	0.857515	0.687163
TG 51:3	1.02719	0.965282	0.987101	1.04063	0.87689	0.870762
TG 52:1	1.02172	0.985285	0.69251	1.03067	0.954021	0.682834
TG 52:2	0.988906	0.936653	0.695632	1.03287	1.01058	0.719558
TG 52:3	0.95445	0.911032	0.740895	1.02865	0.929201	0.767874
TG 52:4	0.950425	0.916832	0.839532	0.901261	0.97889	0.902284
TG 53:1	0.895407	0.802501	1.20424	1.07292	0.872348	0.750378
TG 53:2	0.933908	0.861131	1.261	0.916557	0.87567	0.794634
TG 53:3	0.994452	0.914383	0.76105	0.996652	0.946145	0.755931
TG 53:4	0.94081	0.933551	0.805995	0.884828	0.902228	0.851244
TG 54:1	0.983208	0.979952	1.33313	1.08208	0.997381	0.827258
TG 54:2	1.00128	0.978115	1.26425	0.980943	0.987401	0.793783
TG 54:3	1.00417	0.934559	0.707915	1.01705	1.00524	0.767718
TG 54:4	0.962894	0.902839	0.772145	0.937572	0.945916	0.818456
TG 54:5	1.01836	0.967967	0.926105	0.945617	1.03949	0.98914
TG 54:6	0.895841	0.943798	0.843556	0.809113	1.04069	1.01921
TG 55:2	1.01997	0.90767	1.32582	1.06031	0.955887	0.778321
TG 55:3	0.958938	0.941241	1.39401	0.962388	0.937452	0.854639
TG 55:4	0.984962	0.879939	0.813874	0.996078	0.990372	0.806839
TG 56:1	0.95104	0.910488	1.25053	1.03322	0.859918	0.861873
TG 56:2	1.00374	0.968355	1.2576	1.05029	0.965079	0.809474
TG 56:3	1.01327	0.987213	1.36399	0.995628	1.04461	0.82281
TG 56:4	0.99142	0.906382	0.7431	0.960489	0.991334	0.835136
TG 56:6	0.964528	0.948908	0.957328	0.934666	1.07147	1.05066
TG 56:7	0.987344	0.979226	1.06232	0.955479	1.15428	1.19875
TG 56:8	0.929119	0.996383	1.0126	0.851554	1.15631	1.29552
TG 57:2	0.904732	0.861646	1.34734	1.01018	0.892293	0.760138
TG 57:3	1.0878	0.974568	0.82207	1.0839	1.00123	0.767826
TG 57:4	0.94456	0.892253	0.75204	0.985611	1.02668	0.892971
TG 58:2	1.03645	0.979907	1.27852	1.02832	0.988627	0.81272
TG 58:3	0.994503	0.967217	1.38219	1.01122	0.935848	0.815244
TG 58:4	0.960491	0.950138	1.50961	0.954363	1.02548	0.907051
TG 58:5	0.939777	0.933521	1.6198	0.890142	1.01645	1.0535
TG 58:6	0.997714	0.957094	0.939341	0.9686	1.09937	1.0187
TG 58:7	0.974494	0.976046	0.976525	0.923145	1.09238	1.10199
TG 58:8	1.07088	1.07421	1.1453	0.990252	1.22374	1.27667
TG 59:2	1.11312	1.03678	1.89486	1.21833	1.06275	0.873998
TG 59:3	0.957959	0.850049	1.34095	0.934112	0.935356	0.815791
TG 59:4	0.955419	0.885183	0.893681	1.01637	0.899307	0.752215
TG 60:11	1.04768	1.0959	1.29714	0.952508	1.33874	1.58721
TG 60:2	0.965755	0.827955	1.27052	0.979063	0.92431	0.779766
TG 60:3	0.985028	0.928903	1.27451	0.972324	0.953965	0.82088
TG 60:4	0.987502	0.90052	0.754411	0.9591	0.928806	0.781978
TG 60:5	1.02226	0.966993	0.889185	0.993977	1.05705	0.932971
TG 60:6	0.845021	0.804685	0.930235	0.867955	0.988234	0.949421
TG 62:2	1.04813	0.716514	0.704957	0.757722	0.965335	0.600533
TG 63:3	1.07365	0.914458	0.794179	1.09155	0.986831	0.825575
TG 70:3	1.0557	1.0557	0.564414	0.933571	0.915066	0.660414
TG O-50:2	1.13874	1.00073	0.794437	1.18335	1.01888	0.770689
TG O-50:3	1.01354	0.879628	0.883161	1.02546	0.888737	0.990452
TG O-52:3	1.16266	1.05114	0.89331	1.1219	1.13646	0.892107
TG	0.982823	0.936794	0.999044	0.988391	0.979039	0.861345
TG2	0.982823	0.936794	0.999044	0.988391	0.979039	0.861345
LPC 14:0	1.58294	1.87502	1.60744	1.11897	1.08921	0.709861
LPC 16:0	1.13876	1.20552	0.963197	1.06262	0.937474	0.657271
LPC 16:1	1.45351	1.56529	1.22039	1.16119	1.12474	0.752724
LPC 17:0	0.953593	0.944785	0.710633	0.964005	0.91256	0.638865
LPC 18:0	1.08548	1.0136	0.771297	1.02609	0.983086	0.690067
LPC 18:1	1.56049	1.8552	1.63259	1.07907	1.0896	0.835316
LPC 18:2	1.17102	1.42956	1.44608	0.813287	0.899818	1.05706
LPC 19:0	1.04256	0.977493	0.785938	0.987081	0.901845	0.705763
LPC 20:0	1.04755	0.908272	0.78837	1.02766	0.889235	0.667554
LPC 20:1	1.56393	1.63723	1.43006	1.06258	1.09127	0.826298
LPC 24:0	0.947328	0.875998	0.683434	0.852967	0.87274	0.673351
LPC	1.23156	1.29891	1.09449	1.01414	0.981052	0.746739
LPC2	1.23156	1.29891	1.09449	1.01414	0.981052	0.746739
PC 20:0	1.09761	1.05344	0.608775	1.30193	1.09026	0.581178
PC 22:1	1.16695	1.03667	0.653178	1.26817	1.08185	0.594197
PC 28:0	0.738438	0.800906	0.604692	1.0064	1.20757	0.731575
PC 30:0	1.01882	0.86812	0.709227	1.01544	0.947514	0.764707
PC 30:1	1.02348	0.875733	0.745671	1.07578	1.05125	0.837526
PC 31:0	0.937068	0.850379	0.657454	0.939391	0.927686	0.673378
PC 31:2	1.1124	1.09183	1.06444	1.04108	1.21458	1.13259
PC 32:0	0.876186	0.89919	0.671006	0.926646	0.902189	0.708758
PC 32:1	0.970221	0.879432	0.709881	0.950819	0.93056	0.740735
PC 32:2	0.895099	0.818362	0.770918	0.827864	0.92707	0.891544
PC 33:0	0.894307	0.858886	0.685698	0.941726	0.86938	0.672068
PC 33:1	0.931035	0.877913	0.690159	0.934255	0.917426	0.700038
PC 33:2	0.95977	0.822684	0.825064	0.840211	0.903489	0.93354
PC 34:0	0.9928	0.914849	0.736555	0.971001	0.922433	0.718544
PC 34:1	0.979564	0.840984	0.694749	0.9007	0.931994	0.684434
PC 34:2	0.879578	0.823878	0.718448	0.812677	0.856789	0.815019
PC 34:3	0.796435	0.761861	0.738267	0.745598	0.791556	0.936128
PC 35:0	0.932601	0.883104	0.687106	0.958238	0.907734	0.70729
PC 35:1	0.964883	0.872272	0.694389	0.929043	0.918968	0.736639
PC 35:2	0.864054	0.867835	0.775465	0.898769	0.911901	0.825192
PC 36:0	1.00963	0.987658	0.812952	0.993823	0.990993	0.706146
PC 36:1	0.986026	0.920665	0.727148	0.997725	0.914746	0.751299
PC 36:2	0.884978	0.822574	0.714692	0.873125	0.859016	0.760527
PC 36:3	0.81982	0.793593	0.71248	0.753819	0.798325	0.861911
PC 37:1	1.05591	0.909868	0.731929	1.02767	1.00369	0.726297
PC 37:2	0.950447	0.855543	0.769644	0.91264	0.924867	0.837639
PC 38:0	0.92117	0.832294	0.690784	0.927701	0.920657	0.67722
PC 38:1	0.96898	0.907976	0.700679	1.00125	1.018	0.75468
PC 38:2	0.960898	0.882207	0.76312	0.967595	0.92768	0.801996
PC 38:3	0.851123	0.833043	0.80416	0.763623	0.887589	0.963211
PC 40:0	1.01729	0.924539	0.733742	0.885673	0.906703	0.697167
PC 42:1	1.05732	0.864811	0.56881	1.02675	0.987907	0.733874
PC	0.95359	0.882284	0.724102	0.950535	0.948512	0.770533
PC2	0.95359	0.882284	0.724102	0.950535	0.948512	0.770533
LPC O-16:0	0.807563	0.585378	0.370864	0.991115	1.00827	0.595504
LPC O-16:1	1.92598	2.55781	2.3659	1.35504	1.60539	1.17699
LPC O-18:1	1.5119	1.71363	1.06503	1.40177	1.66304	1.2841
LPC O	1.41515	1.61894	1.26726	1.24931	1.42557	1.01887
LPC O2	1.41515	1.61894	1.26726	1.24931	1.42557	1.01887
PC O-16:0_16:0	0.713874	0.706871	0.477372	0.780522	0.660047	0.471883
PC O-16:0_18:2	0.846384	0.825194	0.671352	0.86426	0.869184	0.707514
PC O-16:1_18:1	0.680535	0.706617	0.545514	0.697543	0.645024	0.516664
PC O-16:1_18:2	0.720696	0.816806	0.690016	0.725671	0.783319	0.807595
PC O-18:1_18:1	0.726206	0.77096	0.555124	0.791912	0.688488	0.562523
PC O-18:1_18:2	0.643539	0.643644	0.548797	0.59795	0.602617	0.571703
PC O-33:1	0.673818	0.680571	0.444371	0.677498	0.713182	0.479875
PC O-36:0	0.843115	0.79887	0.557826	0.876474	0.751921	0.485379
PC O-36:1	0.799781	0.804648	0.554915	0.834453	0.768735	0.511508
PC O-38:3	0.643881	0.528538	0.649255	0.53386	0.651315	0.699162
PC O	0.729183	0.728272	0.569454	0.738014	0.713383	0.581381
PC O2	0.729183	0.728272	0.569454	0.738014	0.713383	0.581381
LPE 18:2	0.889004	0.836796	0.677219	0.818082	0.848555	0.600842
LPE 20:1	1.59056	1.99089	1.60247	0.995138	0.909525	0.836682
LPE 20:3	0.897712	0.972075	0.853674	0.780317	0.943921	0.799917
LPE 20:4	0.849152	0.878098	0.933245	0.662082	0.929588	0.931003
LPE 22:4	0.720878	0.753915	0.692349	0.645555	0.758511	0.712397
LPE	0.989462	1.08635	0.951791	0.780234	0.87802	0.776168
LPE2	0.989462	1.08635	0.951791	0.780234	0.87802	0.776168
PE 32:0	0.844365	0.85107	0.677787	0.920337	0.874016	0.587053
PE 32:1	1.60826	1.82606	1.43857	2.04235	1.9682	1.20564
PE 34:1	0.968915	0.924402	0.73625	0.967784	0.969512	0.698321
PE 34:2	0.940626	0.85216	0.768125	0.879488	0.942461	0.800021
PE 36:1	0.980564	0.928794	0.742591	0.952946	1.00961	0.76539
PE 36:2	0.910468	0.850663	0.795966	0.885292	0.949293	0.770621
PE 36:3	0.853794	0.864278	0.738561	0.828264	0.833105	0.847711
PE 38:2	1.03194	0.966304	0.876887	0.999063	1.11037	0.849682
PE	1.01737	1.00797	0.846842	1.05944	1.08207	0.815554
PE2	1.01737	1.00797	0.846842	1.05944	1.08207	0.815554
LPE O-18:1	1.43062	1.53535	1.12264	1.25715	1.4308	0.855934
LPE O	1.43062	1.53535	1.12264	1.25715	1.4308	0.855934
LPE O2	1.43062	1.53535	1.12264	1.25715	1.4308	0.855934
PE O-16:1_16:0	1.11277	1.13621	0.967835	1.10351	1.03207	1.0523
PE O-16:1_18:1	1.15946	1.14567	0.991018	1.06082	1.24623	1.0559
PE O-16:1_18:2	1.02042	1.03197	1.04889	0.960696	1.18285	1.1081
PE O-18:1_16:0	1.42829	1.31093	1.31137	1.3998	1.44819	1.42826
PE O-18:1_18:1	1.24936	1.12314	1.02192	1.06031	1.23071	1.03752
PE O-18:1_18:2	1.0886	1.09126	1.10545	1.00794	1.2669	1.17121
PE O-18:2_18:2	0.991186	1.03083	1.06923	0.888496	1.06885	1.29381
PE O	1.15001	1.12429	1.07367	1.0688	1.21083	1.16387
PE O2	1.15001	1.12429	1.07367	1.0688	1.21083	1.16387
LPG 16:0	1.81363	2.29805	2.21081	1.06066	1.07134	1.00044
LPG	1.81363	2.29805	2.21081	1.06066	1.07134	1.00044
LPG2	1.81363	2.29805	2.21081	1.06066	1.07134	1.00044
PG 32:0	0.918143	0.889323	0.647634	1.03177	0.934298	0.655314
PG	0.918143	0.889323	0.647634	1.03177	0.934298	0.655314
PG2	0.918143	0.889323	0.647634	1.03177	0.934298	0.655314
LPI 18:0	0.942635	0.997801	0.858028	0.964606	0.860645	0.692034
LPI	0.942635	0.997801	0.858028	0.964606	0.860645	0.692034
LPI2	0.942635	0.997801	0.858028	0.964606	0.860645	0.692034
PI 34:2	0.9005	0.93852	0.690646	0.824067	0.854117	0.860699
PI 35:2	0.687196	0.768751	0.728251	0.716028	0.823994	0.704079
PI 36:1	0.893543	0.935304	0.550352	0.942279	0.810802	0.569764
PI 36:2	0.890801	0.928747	0.656748	0.840946	0.814369	0.655831
PI 36:3	0.764833	0.811258	0.724518	0.687291	0.803405	0.885197
PI 38:3	1.03332	0.957495	0.7287	0.846867	0.874303	0.768777
PI 38:4	0.899934	0.983566	0.837806	0.777422	0.936238	0.986899
PI	0.867161	0.903377	0.702431	0.804986	0.845318	0.775892
PI2	0.867161	0.903377	0.702431	0.804986	0.845318	0.775892
LPS 18:0	1.06572	1.22368	1.05863	1.08632	1.06597	0.760295
LPS 18:1	2.0311	3.20617	3.00825	1.42682	1.47594	0.937193
LPS	1.54841	2.21492	2.03344	1.25657	1.27096	0.848744
LPS2	1.54841	2.21492	2.03344	1.25657	1.27096	0.848744
PS 34:1	0.949734	0.963932	0.680015	0.954379	1.06963	0.730412
PS 36:1	0.919549	0.900179	0.667967	0.933577	0.966988	0.711678
PS 36:2	0.935115	0.904687	0.714336	0.866303	0.983894	0.819746
PS 38:2	1.01481	0.885837	0.696055	0.932883	1.09151	0.866507
PS 38:3	1.05553	0.965937	0.831167	0.846951	1.11082	1.01135
PS 38:4	0.885822	0.92631	0.98168	0.752487	1.04743	1.31236
PS 40:4	0.927374	0.970463	0.916914	0.826796	0.942843	1.34541
PS	0.955419	0.931049	0.784019	0.873339	1.03045	0.971066
PS2	0.955419	0.931049	0.784019	0.873339	1.03045	0.971066

## Sheet: Spleen Individual Lipid FC
Analyte	spleen_RT_35	spleen_RT_90	spleen_RT_120	spleen_IW_35	spleen_IW_90	spleen_IW_120
Cer 18:0;O2/16:0	2.26174	2.77553	3.0531	1.13881	1.19072	1.25343
Cer 18:0;O2/22:0	1.81468	1.83177	1.8214	1.2216	0.926138	0.948468
Cer 18:0;O2/24:0	1.13808	1.0641	1.12578	0.889331	1.06001	1.10387
Cer 18:0;O2/24:1	1.95702	2.19888	2.47286	1.08975	1.11999	1.20953
Cer 18:1;O2/16:0	2.43017	3.16854	3.47005	1.09306	1.16092	1.2726
Cer 18:1;O2/18:0	2.40901	2.8425	3.19171	1.0052	1.08493	1.14638
Cer 18:1;O2/20:0	2.28944	2.56354	2.83411	1.09574	1.12241	1.13178
Cer 18:1;O2/22:0	2.32284	2.72292	2.81879	1.08774	1.11607	1.26157
Cer 18:1;O2/23:0	2.15451	2.41171	2.72067	1.04943	1.06473	1.24322
Cer 18:1;O2/24:0	1.95702	2.19888	2.47286	1.08975	1.11999	1.20953
Cer 18:1;O2/24:1	1.89739	2.16799	2.34469	1.12891	1.1988	1.39265
Cer 18:1;O2/26:0	2.40753	2.41748	3.23077	1.79432	1.91777	1.05002
Cer 18:2;O2/16:0	3.68463	5.40426	6.61948	1.23235	1.74366	1.84745
Cer 18:2;O2/22:0	1.76457	2.04175	2.00164	1.17818	1.24359	1.40553
Cer 18:2;O2/23:0	3.17957	4.01329	3.78166	1.84675	2.23307	2.38205
Cer 18:2;O2/24:1	1.67906	1.88484	2.05309	1.15072	1.21068	1.30938
Cer	2.2092	2.60675	2.87579	1.19323	1.28209	1.32297
Cer2	2.2092	2.60675	2.87579	1.19323	1.28209	1.32297
Hex2Cer 18:1;O2/16:0	2.41445	4.04149	4.76599	2.06492	1.13607	0.962358
Hex2Cer 18:1;O2/24:0	1.23335	1.49486	1.1997	0.929664	0.957167	1.12723
Hex2Cer 18:1;O2/24:1	0.955624	1.03322	1.22322	1.03539	0.861472	1.00784
HexCer 18:1;O2/18:0	0.672451	0.510365	0.43626	0.985281	1.03658	1.0342
HexCer 18:1;O2/20:0	0.637462	0.451054	0.474041	0.973794	0.985415	0.976999
HexCer 18:1;O2/22:0	0.653095	0.502943	0.496689	1.03052	1.03533	0.999756
HexCer 18:1;O2/23:1	0.541858	0.263187	0.151286	0.996686	1.07196	0.854824
HexCer 18:1;O2/24:0	0.735375	0.591078	0.552834	1.09561	1.07671	1.13167
HexCer 18:1;O2/24:1	0.642508	0.479884	0.454993	1.0309	0.972475	0.916601
HexCer 18:1;O2/24:2	0.634046	0.436114	0.409075	1.03687	0.926412	0.936511
HexCer	0.912022	0.980419	1.01641	1.11796	1.00596	0.994798
HexCer2	0.912022	0.980419	1.01641	1.11796	1.00596	0.994798
SM 32:1;O2	1.02927	0.96996	0.937761	1.00886	0.988292	0.98403
SM 33:1;O2	0.975087	0.972532	0.929474	0.999392	1.05803	1.03897
SM 33:2;O2	1.54804	2.89367	2.55793	1.3567	4.04024	2.5427
SM 34:0;O2	1.02052	1.01274	0.949203	0.949435	0.999175	1.00211
SM 34:1;O2	1.00376	0.978739	0.948842	0.970052	1.01495	1.03109
SM 34:1;O3	0.977916	0.987569	0.940399	0.961278	1.10729	1.04229
SM 34:2;O2	1.04133	0.939854	0.889357	1.00088	0.973138	0.988017
SM 35:1;O2	1.02924	1.03482	1.01459	0.989688	1.02332	1.02188
SM 36:0;O2	1.02873	1.0286	0.969091	0.992826	1.0691	1.02341
SM 36:1;O2	0.989856	0.947295	0.995906	0.935465	0.99034	0.991066
SM 36:2;O2	0.988943	0.945309	0.958222	1.01094	1.03055	1.05208
SM 37:1;O2	1.03262	0.997558	0.982937	0.944982	1.01654	1.00038
SM 38:0;O2	1.00196	0.952444	0.936792	0.964061	0.998039	1.01331
SM 38:1;O2	1.03317	0.965266	0.974407	0.985442	1.02582	1.01707
SM 38:2;O2	0.973021	1.00139	0.949983	1.05189	0.996957	1.00482
SM 39:1;O2	1.0097	0.979818	0.782661	1.03083	1.04731	1.02852
SM 39:2;O2	1.29845	1.15298	1.10627	1.57207	0.722947	1.10206
SM 40:0;O2	1.02635	0.980548	0.948619	1.01093	1.04073	1.01329
SM 40:1;O2	0.987142	0.965429	0.933462	0.938714	0.990415	1.00039
SM 40:2;O2	1.02442	0.945337	0.936881	0.948591	0.901206	0.98346
SM 40:3;O2	0.995472	1.0004	0.952109	1.01344	0.976656	1.0128
SM 41:1;O2	0.997509	1.01252	0.988893	0.998747	1.05351	1.03103
SM 41:2;O2	1.02754	1.0004	0.982148	0.997293	1.03848	1.03776
SM 42:0;O2	1.07258	1.14515	0.998003	0.965539	1.04969	1.13746
SM 42:1;O2	1.03388	0.985634	0.97707	0.983526	1.04769	0.988586
SM 42:1;O3	1.08795	1.11116	0.939097	1.00546	1.08717	1.10658
SM 42:2;O2	0.980697	0.959634	0.926256	0.944566	0.976921	0.986827
SM 42:3;O2	1.02948	0.955764	0.94172	0.969813	0.993494	0.992832
SM 43:1;O2	0.985426	1.03274	0.93427	0.961486	1.01869	1.07639
SM 43:2;O2	0.994868	0.957739	0.889458	0.94346	0.95952	1.004
SM 44:2;O2	1.06583	1.00992	0.960102	1.01642	1.02753	0.983338
SM 44:3;O2	0.942697	0.906329	0.833008	0.993596	0.94197	0.947851
SM	1.03855	1.05404	0.998904	1.01301	1.10018	1.06833
SM2	1.03855	1.05404	0.998904	1.01301	1.10018	1.06833
DG 34:1	0.135437	0.0786219	0.0526396	0.306485	0.258203	0.192081
DG 34:3	0.0982567	0.0392247	0.0258962	0.407712	0.281484	0.105717
DG 36:2	0.119028	0.0805108	0.0468097	0.391485	0.275904	0.192566
DG 36:3	0.135418	0.0717367	0.0487161	0.402576	0.297214	0.191463
DG 38:4	0.226842	0.153752	0.0872009	0.527524	0.474296	0.35007
DG 38:5	0.25299	0.155376	0.112833	0.550514	0.414127	0.319895
DG 40:6	0.33598	0.271292	0.173884	0.500336	0.430326	0.270508
DG 40:7	0.250234	0.150427	0.101365	0.534254	0.400806	0.292681
DG	0.194273	0.125118	0.081168	0.452611	0.354045	0.239373
DG2	0.194273	0.125118	0.081168	0.452611	0.354045	0.239373
TG 48:0	0.242947	0.147083	0.13801	1.46703	1.48512	1.33333
TG 50:0	0.108223	0.0681275	0.0491876	1.03264	0.947378	0.775062
TG 50:1	0.221995	0.0849354	0.0678853	0.550405	0.502275	0.339808
TG 50:2	0.181778	0.0599573	0.0436937	0.363499	0.299102	0.138394
[truncated: 284 more rows]

## Sheet: Liver Hypothesis Testing
Used parameters in GraphPad Prism
[truncated: 56 more rows]

[truncated: 4 more sheets: Kidney Hypothesis Testing, Heart Hypothesis Testing, Spleen Hypothesis Testing, Method Details]
